# Supplementary material
Source: publisher figshare collection journal article supplement (https://gsajournals.figshare.com/ndownloader/files/37493452)
Supplement: Supplementary file 1 [file 37493452]

g4908.t1_1	.	polypeptide	1	57	.	+	.	ID=g4908.t1_1;md5=b6c3040ddd72b5364406b6cca583768b
g4908.t1_1	MobiDBLite	protein_match	1	57	.	+	.	date=18-12-2020;Target=g4908.t1_1 1 57;ID=match$1_1_57;signature_desc=consensus disorder prediction;Name=mobidb-lite;status=T
g4908.t1_1	MobiDBLite	protein_match	1	27	.	+	.	date=18-12-2020;Target=g4908.t1_1 1 27;ID=match$2_1_27;signature_desc=consensus disorder prediction;Name=mobidb-lite;status=T
g4908.t1_1	MobiDBLite	protein_match	35	57	.	+	.	date=18-12-2020;Target=g4908.t1_1 35 57;ID=match$3_35_57;signature_desc=consensus disorder prediction;Name=mobidb-lite;status=T
g15575.t1_1	.	polypeptide	1	389	.	+	.	ID=g15575.t1_1;md5=99986d19fbf0df5fedb309f73e28c4cf
g15575.t1_1	PANTHER	protein_match	24	209	6.1E-169	+	.	date=18-12-2020;Target=g15575.t1_1 24 209;ID=match$4_24_209;Name=PTHR44129;status=T
g15575.t1_1	ProSiteProfiles	protein_match	286	311	11.01	+	.	date=18-12-2020;Target=g15575.t1_1 286 311;Ontology_term="GO:0005515";ID=match$5_286_311;signature_desc=Trp-Asp (WD) repeats profile.;Name=PS50082;status=T;Dbxref="InterPro:IPR001680"
g15575.t1_1	Gene3D	protein_match	223	388	7.1E-60	+	.	date=18-12-2020;Target=g15575.t1_1 223 388;Ontology_term="GO:0005515";ID=match$6_223_388;Name=G3DSA:2.130.10.10;status=T;Dbxref="InterPro:IPR015943"
g15575.t1_1	Gene3D	protein_match	111	212	2.1E-38	+	.	date=18-12-2020;Target=g15575.t1_1 111 212;Ontology_term="GO:0005515";ID=match$6_111_212;Name=G3DSA:2.130.10.10;status=T;Dbxref="InterPro:IPR015943"
g15575.t1_1	Coils	protein_match	68	88	.	+	.	date=18-12-2020;Target=g15575.t1_1 68 88;ID=match$7_68_88;Name=Coil;status=T
g15575.t1_1	ProSitePatterns	protein_match	289	303	.	+	.	date=18-12-2020;Target=g15575.t1_1 289 303;ID=match$8_289_303;signature_desc=Trp-Asp (WD) repeats signature.;Name=PS00678;status=T;Dbxref="InterPro:IPR019775"
g15575.t1_1	ProSitePatterns	protein_match	133	147	.	+	.	date=18-12-2020;Target=g15575.t1_1 133 147;ID=match$9_133_147;signature_desc=Trp-Asp (WD) repeats signature.;Name=PS00678;status=T;Dbxref="InterPro:IPR019775"
g15575.t1_1	PANTHER	protein_match	24	209	6.1E-169	+	.	date=18-12-2020;Target=g15575.t1_1 24 209;ID=match$10_24_209;Name=PTHR44129:SF10;status=T
g15575.t1_1	ProSiteProfiles	protein_match	354	389	11.979	+	.	date=18-12-2020;Target=g15575.t1_1 354 389;Ontology_term="GO:0005515";ID=match$11_354_389;signature_desc=Trp-Asp (WD) repeats profile.;Name=PS50082;status=T;Dbxref="InterPro:IPR001680"
g15575.t1_1	ProSitePatterns	protein_match	331	345	.	+	.	date=18-12-2020;Target=g15575.t1_1 331 345;ID=match$12_331_345;signature_desc=Trp-Asp (WD) repeats signature.;Name=PS00678;status=T;Dbxref="InterPro:IPR019775"
g15575.t1_1	ProSitePatterns	protein_match	175	189	.	+	.	date=18-12-2020;Target=g15575.t1_1 175 189;ID=match$13_175_189;signature_desc=Trp-Asp (WD) repeats signature.;Name=PS00678;status=T;Dbxref="InterPro:IPR019775"
g15575.t1_1	ProSiteProfiles	protein_match	19	51	9.295	+	.	date=18-12-2020;Target=g15575.t1_1 19 51;Ontology_term="GO:0005515";ID=match$14_19_51;signature_desc=LIS1 homology (LisH) motif profile.;Name=PS50896;status=T;Dbxref="InterPro:IPR006594"
g15575.t1_1	ProSiteProfiles	protein_match	114	155	16.557	+	.	date=18-12-2020;Target=g15575.t1_1 114 155;Ontology_term="GO:0005515";ID=match$15_114_155;signature_desc=Trp-Asp (WD) repeats profile.;Name=PS50082;status=T;Dbxref="InterPro:IPR001680"
g15575.t1_1	SUPERFAMILY	protein_match	104	385	1.86E-68	+	.	date=18-12-2020;Target=g15575.t1_1 104 385;Ontology_term="GO:0005515";ID=match$16_104_385;Name=SSF50978;status=T;Dbxref="InterPro:IPR036322"
g15575.t1_1	Gene3D	protein_match	21	96	1.4E-25	+	.	date=18-12-2020;Target=g15575.t1_1 21 96;ID=match$17_21_96;Name=G3DSA:1.20.960.30;status=T
g15575.t1_1	ProSiteProfiles	protein_match	156	190	14.886	+	.	date=18-12-2020;Target=g15575.t1_1 156 190;Ontology_term="GO:0005515";ID=match$18_156_190;signature_desc=Trp-Asp (WD) repeats profile.;Name=PS50082;status=T;Dbxref="InterPro:IPR001680"
g15575.t1_1	SMART	protein_match	19	51	0.0028	+	.	date=18-12-2020;Target=g15575.t1_1 19 51;Ontology_term="GO:0005515";ID=match$19_19_51;Name=SM00667;status=T;Dbxref="InterPro:IPR006594"
g15575.t1_1	ProSitePatterns	protein_match	373	387	.	+	.	date=18-12-2020;Target=g15575.t1_1 373 387;ID=match$20_373_387;signature_desc=Trp-Asp (WD) repeats signature.;Name=PS00678;status=T;Dbxref="InterPro:IPR019775"
g15575.t1_1	CDD	protein_match	110	385	1.09554E-70	+	.	date=18-12-2020;Target=g15575.t1_1 110 385;ID=match$21_110_385;signature_desc=WD40;Name=cd00200;status=T
g15575.t1_1	SMART	protein_match	347	386	2.2E-7	+	.	date=18-12-2020;Target=g15575.t1_1 347 386;Ontology_term="GO:0005515";ID=match$22_347_386;Name=SM00320;status=T;Dbxref="InterPro:IPR001680"
g15575.t1_1	SMART	protein_match	149	188	6.7E-11	+	.	date=18-12-2020;Target=g15575.t1_1 149 188;Ontology_term="GO:0005515";ID=match$22_149_188;Name=SM00320;status=T;Dbxref="InterPro:IPR001680"
g15575.t1_1	SMART	protein_match	305	344	1.4E-11	+	.	date=18-12-2020;Target=g15575.t1_1 305 344;Ontology_term="GO:0005515";ID=match$22_305_344;Name=SM00320;status=T;Dbxref="InterPro:IPR001680"
g15575.t1_1	SMART	protein_match	107	146	1.8E-6	+	.	date=18-12-2020;Target=g15575.t1_1 107 146;Ontology_term="GO:0005515";ID=match$22_107_146;Name=SM00320;status=T;Dbxref="InterPro:IPR001680"
g15575.t1_1	SMART	protein_match	243	302	5.5E-7	+	.	date=18-12-2020;Target=g15575.t1_1 243 302;Ontology_term="GO:0005515";ID=match$22_243_302;Name=SM00320;status=T;Dbxref="InterPro:IPR001680"
g15575.t1_1	SUPERFAMILY	protein_match	24	86	5.1E-18	+	.	date=18-12-2020;Target=g15575.t1_1 24 86;ID=match$23_24_86;Name=SSF109925;status=T;Dbxref="InterPro:IPR037190"
g15575.t1_1	ProSiteProfiles	protein_match	312	353	17.493	+	.	date=18-12-2020;Target=g15575.t1_1 312 353;Ontology_term="GO:0005515";ID=match$24_312_353;signature_desc=Trp-Asp (WD) repeats profile.;Name=PS50082;status=T;Dbxref="InterPro:IPR001680"
g15575.t1_1	Pfam	protein_match	24	47	1.2E-5	+	.	date=18-12-2020;Target=g15575.t1_1 24 47;Ontology_term="GO:0005515";ID=match$25_24_47;signature_desc=LisH;Name=PF08513;status=T;Dbxref="InterPro:IPR006594"
g15575.t1_1	ProSiteProfiles	protein_match	114	389	50.331	+	.	date=18-12-2020;Target=g15575.t1_1 114 389;Ontology_term="GO:0005515";ID=match$26_114_389;signature_desc=Trp-Asp (WD) repeats circular profile.;Name=PS50294;status=T;Dbxref="InterPro:IPR017986"
g15575.t1_1	PANTHER	protein_match	228	388	6.1E-169	+	.	date=18-12-2020;Target=g15575.t1_1 228 388;ID=match$27_228_388;Name=PTHR44129;status=T
g15575.t1_1	Pfam	protein_match	114	146	0.0022	+	.	date=18-12-2020;Target=g15575.t1_1 114 146;Ontology_term="GO:0005515";ID=match$28_114_146;signature_desc=WD domain, G-beta repeat;Name=PF00400;status=T;Dbxref="InterPro:IPR001680"
g15575.t1_1	Pfam	protein_match	308	344	2.5E-9	+	.	date=18-12-2020;Target=g15575.t1_1 308 344;Ontology_term="GO:0005515";ID=match$28_308_344;signature_desc=WD domain, G-beta repeat;Name=PF00400;status=T;Dbxref="InterPro:IPR001680"
g15575.t1_1	Pfam	protein_match	152	188	1.5E-7	+	.	date=18-12-2020;Target=g15575.t1_1 152 188;Ontology_term="GO:0005515";ID=match$28_152_188;signature_desc=WD domain, G-beta repeat;Name=PF00400;status=T;Dbxref="InterPro:IPR001680"
g15575.t1_1	Pfam	protein_match	349	385	4.3E-6	+	.	date=18-12-2020;Target=g15575.t1_1 349 385;Ontology_term="GO:0005515";ID=match$28_349_385;signature_desc=WD domain, G-beta repeat;Name=PF00400;status=T;Dbxref="InterPro:IPR001680"
g15575.t1_1	Pfam	protein_match	249	302	1.0E-5	+	.	date=18-12-2020;Target=g15575.t1_1 249 302;Ontology_term="GO:0005515";ID=match$28_249_302;signature_desc=WD domain, G-beta repeat;Name=PF00400;status=T;Dbxref="InterPro:IPR001680"
g15575.t1_1	PANTHER	protein_match	228	388	6.1E-169	+	.	date=18-12-2020;Target=g15575.t1_1 228 388;ID=match$29_228_388;Name=PTHR44129:SF10;status=T
g15575.t1_1	PRINTS	protein_match	289	303	4.7E-10	+	.	date=18-12-2020;Target=g15575.t1_1 289 303;ID=match$30_289_303;signature_desc=G protein beta WD-40 repeat signature;Name=PR00320;status=T;Dbxref="InterPro:IPR020472"
g15575.t1_1	PRINTS	protein_match	133	147	4.7E-10	+	.	date=18-12-2020;Target=g15575.t1_1 133 147;ID=match$30_133_147;signature_desc=G protein beta WD-40 repeat signature;Name=PR00320;status=T;Dbxref="InterPro:IPR020472"
g15575.t1_1	PRINTS	protein_match	331	345	4.7E-10	+	.	date=18-12-2020;Target=g15575.t1_1 331 345;ID=match$30_331_345;signature_desc=G protein beta WD-40 repeat signature;Name=PR00320;status=T;Dbxref="InterPro:IPR020472"
g11910.t1_1	.	polypeptide	1	221	.	+	.	ID=g11910.t1_1;md5=6faa874dabaaacb4347eb70b78eb6b55
g11910.t1_1	Pfam	protein_match	2	128	1.9E-15	+	.	date=18-12-2020;Target=g11910.t1_1 2 128;Ontology_term="GO:0016020","GO:0055085";ID=match$31_2_128;signature_desc=Amino acid permease;Name=PF00324;status=T;Dbxref="InterPro:IPR004841"
g11910.t1_1	PANTHER	protein_match	1	212	3.6E-66	+	.	date=18-12-2020;Target=g11910.t1_1 1 212;ID=match$32_1_212;Name=PTHR11827;status=T
g11910.t1_1	PANTHER	protein_match	1	212	3.6E-66	+	.	date=18-12-2020;Target=g11910.t1_1 1 212;Ontology_term="GO:0005887","GO:0006811","GO:0015379","GO:0071477","GO:1902476";ID=match$33_1_212;Name=PTHR11827:SF66;status=T;Dbxref="InterPro:IPR030364"
g1485.t1_1	.	polypeptide	1	79	.	+	.	ID=g1485.t1_1;md5=bf76b966a796cd23f59c6a8a9a400022
g1485.t1_1	MobiDBLite	protein_match	1	20	.	+	.	date=18-12-2020;Target=g1485.t1_1 1 20;ID=match$34_1_20;signature_desc=consensus disorder prediction;Name=mobidb-lite;status=T
g1485.t1_1	MobiDBLite	protein_match	44	79	.	+	.	date=18-12-2020;Target=g1485.t1_1 44 79;ID=match$35_44_79;signature_desc=consensus disorder prediction;Name=mobidb-lite;status=T
g1503.t1_1	.	polypeptide	1	325	.	+	.	ID=g1503.t1_1;md5=41c686e42f1cdedcf8093b70dc69660f
g1503.t1_1	SUPERFAMILY	protein_match	14	91	2.22E-19	+	.	date=18-12-2020;Target=g1503.t1_1 14 91;ID=match$36_14_91;Name=SSF46938;status=T;Dbxref="InterPro:IPR036273"
g1503.t1_1	PRINTS	protein_match	190	211	5.8E-12	+	.	date=18-12-2020;Target=g1503.t1_1 190 211;ID=match$37_190_211;signature_desc=Cellular retinaldehyde-binding protein signature;Name=PR00180;status=T
g1503.t1_1	PRINTS	protein_match	254	263	5.8E-12	+	.	date=18-12-2020;Target=g1503.t1_1 254 263;ID=match$37_254_263;signature_desc=Cellular retinaldehyde-binding protein signature;Name=PR00180;status=T
g1503.t1_1	PRINTS	protein_match	66	88	5.8E-12	+	.	date=18-12-2020;Target=g1503.t1_1 66 88;ID=match$37_66_88;signature_desc=Cellular retinaldehyde-binding protein signature;Name=PR00180;status=T
g1503.t1_1	PRINTS	protein_match	223	242	5.8E-12	+	.	date=18-12-2020;Target=g1503.t1_1 223 242;ID=match$37_223_242;signature_desc=Cellular retinaldehyde-binding protein signature;Name=PR00180;status=T
g1503.t1_1	ProSiteProfiles	protein_match	107	268	13.513	+	.	date=18-12-2020;Target=g1503.t1_1 107 268;ID=match$38_107_268;signature_desc=CRAL-TRIO lipid binding domain profile.;Name=PS50191;status=T;Dbxref="InterPro:IPR001251"
g1503.t1_1	Gene3D	protein_match	104	290	1.2E-32	+	.	date=18-12-2020;Target=g1503.t1_1 104 290;ID=match$39_104_290;Name=G3DSA:3.40.525.10;status=T;Dbxref="InterPro:IPR036865"
g1503.t1_1	SUPERFAMILY	protein_match	110	284	8.24E-35	+	.	date=18-12-2020;Target=g1503.t1_1 110 284;ID=match$40_110_284;Name=SSF52087;status=T;Dbxref="InterPro:IPR036865"
g1503.t1_1	SMART	protein_match	63	88	2.1E-6	+	.	date=18-12-2020;Target=g1503.t1_1 63 88;ID=match$41_63_88;Name=SM01100;status=T;Dbxref="InterPro:IPR011074"
g1503.t1_1	Gene3D	protein_match	8	94	2.8E-17	+	.	date=18-12-2020;Target=g1503.t1_1 8 94;ID=match$42_8_94;Name=G3DSA:1.10.8.20;status=T
g1503.t1_1	PANTHER	protein_match	3	324	8.8E-99	+	.	date=18-12-2020;Target=g1503.t1_1 3 324;ID=match$43_3_324;Name=PTHR10174;status=T
g1503.t1_1	SMART	protein_match	113	265	2.1E-5	+	.	date=18-12-2020;Target=g1503.t1_1 113 265;ID=match$44_113_265;Name=SM00516;status=T;Dbxref="InterPro:IPR001251"
g1503.t1_1	CDD	protein_match	116	263	3.79667E-20	+	.	date=18-12-2020;Target=g1503.t1_1 116 263;ID=match$45_116_263;signature_desc=SEC14;Name=cd00170;status=T;Dbxref="InterPro:IPR001251"
g1503.t1_1	PANTHER	protein_match	3	324	8.8E-99	+	.	date=18-12-2020;Target=g1503.t1_1 3 324;ID=match$46_3_324;Name=PTHR10174:SF166;status=T
g1503.t1_1	Pfam	protein_match	113	263	2.6E-24	+	.	date=18-12-2020;Target=g1503.t1_1 113 263;ID=match$47_113_263;signature_desc=CRAL/TRIO domain;Name=PF00650;status=T;Dbxref="InterPro:IPR001251"
g6045.t1_1	.	polypeptide	1	260	.	+	.	ID=g6045.t1_1;md5=81862af360e991de650ef0218055d7d7
g6045.t1_1	Gene3D	protein_match	18	259	1.9E-62	+	.	date=18-12-2020;Target=g6045.t1_1 18 259;ID=match$55_18_259;Name=G3DSA:3.40.630.30;status=T
g6045.t1_1	PANTHER	protein_match	48	257	4.2E-31	+	.	date=18-12-2020;Target=g6045.t1_1 48 257;ID=match$56_48_257;Name=PTHR20905:SF1;status=T
g6045.t1_1	SUPERFAMILY	protein_match	54	225	4.58E-8	+	.	date=18-12-2020;Target=g6045.t1_1 54 225;ID=match$57_54_225;Name=SSF55729;status=T;Dbxref="InterPro:IPR016181"
g6045.t1_1	PANTHER	protein_match	48	257	4.2E-31	+	.	date=18-12-2020;Target=g6045.t1_1 48 257;ID=match$58_48_257;Name=PTHR20905;status=T
g6045.t1_1	ProSiteProfiles	protein_match	105	244	9.368	+	.	date=18-12-2020;Target=g6045.t1_1 105 244;Ontology_term="GO:0008080";ID=match$59_105_244;signature_desc=Gcn5-related N-acetyltransferase (GNAT) domain profile.;Name=PS51186;status=T;Dbxref="InterPro:IPR000182"
g11865.t1_1	.	polypeptide	1	548	.	+	.	ID=g11865.t1_1;md5=7ad1d6a121a3f6bce8cadbdc60f0f765
g11865.t1_1	MobiDBLite	protein_match	285	309	.	+	.	date=18-12-2020;Target=g11865.t1_1 285 309;ID=match$60_285_309;signature_desc=consensus disorder prediction;Name=mobidb-lite;status=T
g11865.t1_1	PANTHER	protein_match	11	542	3.8E-66	+	.	date=18-12-2020;Target=g11865.t1_1 11 542;ID=match$61_11_542;Name=PTHR15696;status=T
g11865.t1_1	Gene3D	protein_match	346	546	4.6E-49	+	.	date=18-12-2020;Target=g11865.t1_1 346 546;ID=match$62_346_546;Name=G3DSA:3.40.50.1010;status=T
g11865.t1_1	SUPERFAMILY	protein_match	352	540	1.1E-6	+	.	date=18-12-2020;Target=g11865.t1_1 352 540;ID=match$63_352_540;Name=SSF88723;status=T;Dbxref="InterPro:IPR029060"
g11865.t1_1	SUPERFAMILY	protein_match	79	204	2.2E-11	+	.	date=18-12-2020;Target=g11865.t1_1 79 204;Ontology_term="GO:0005515";ID=match$64_79_204;Name=SSF48452;status=T;Dbxref="InterPro:IPR011990"
g11865.t1_1	CDD	protein_match	348	543	1.3155E-60	+	.	date=18-12-2020;Target=g11865.t1_1 348 543;ID=match$65_348_543;signature_desc=PIN_Smg6-like;Name=cd09885;status=T
g11865.t1_1	MobiDBLite	protein_match	310	331	.	+	.	date=18-12-2020;Target=g11865.t1_1 310 331;ID=match$66_310_331;signature_desc=consensus disorder prediction;Name=mobidb-lite;status=T
g11865.t1_1	Coils	protein_match	318	341	.	+	.	date=18-12-2020;Target=g11865.t1_1 318 341;ID=match$67_318_341;Name=Coil;status=T
g11865.t1_1	PANTHER	protein_match	11	542	3.8E-66	+	.	date=18-12-2020;Target=g11865.t1_1 11 542;ID=match$68_11_542;Name=PTHR15696:SF0;status=T
g11865.t1_1	Pfam	protein_match	18	163	1.2E-7	+	.	date=18-12-2020;Target=g11865.t1_1 18 163;ID=match$69_18_163;signature_desc=Est1 DNA/RNA binding domain;Name=PF10373;status=T;Dbxref="InterPro:IPR018834"
g11865.t1_1	Pfam	protein_match	355	534	4.9E-16	+	.	date=18-12-2020;Target=g11865.t1_1 355 534;ID=match$70_355_534;signature_desc=PIN domain;Name=PF13638;status=T;Dbxref="InterPro:IPR002716"
g11865.t1_1	SMART	protein_match	353	524	2.2E-12	+	.	date=18-12-2020;Target=g11865.t1_1 353 524;ID=match$71_353_524;Name=SM00670;status=T;Dbxref="InterPro:IPR002716"
g11865.t1_1	MobiDBLite	protein_match	255	331	.	+	.	date=18-12-2020;Target=g11865.t1_1 255 331;ID=match$72_255_331;signature_desc=consensus disorder prediction;Name=mobidb-lite;status=T
g2011.t1_1	.	polypeptide	1	388	.	+	.	ID=g2011.t1_1;md5=d051c163fc062b92a830689f433ccebc
g2011.t1_1	Gene3D	protein_match	57	287	2.3E-65	+	.	date=18-12-2020;Target=g2011.t1_1 57 287;ID=match$73_57_287;Name=G3DSA:2.40.10.10;status=T;Dbxref="InterPro:IPR043504"
g2011.t1_1	CDD	protein_match	45	289	2.19378E-77	+	.	date=18-12-2020;Target=g2011.t1_1 45 289;Ontology_term="GO:0004252","GO:0006508";ID=match$74_45_289;signature_desc=Tryp_SPc;Name=cd00190;status=T;Dbxref="InterPro:IPR001254"
g2011.t1_1	ProSitePatterns	protein_match	86	91	.	+	.	date=18-12-2020;Target=g2011.t1_1 86 91;Ontology_term="GO:0004252","GO:0006508";ID=match$75_86_91;signature_desc=Serine proteases, trypsin family, histidine active site.;Name=PS00134;status=T;Dbxref="InterPro:IPR018114"
g2011.t1_1	PANTHER	protein_match	3	289	1.4E-82	+	.	date=18-12-2020;Target=g2011.t1_1 3 289;ID=match$76_3_289;Name=PTHR24260;status=T
g2011.t1_1	Pfam	protein_match	45	286	9.5E-52	+	.	date=18-12-2020;Target=g2011.t1_1 45 286;Ontology_term="GO:0004252","GO:0006508";ID=match$77_45_286;signature_desc=Trypsin;Name=PF00089;status=T;Dbxref="InterPro:IPR001254"
g2011.t1_1	SUPERFAMILY	protein_match	34	289	2.19E-74	+	.	date=18-12-2020;Target=g2011.t1_1 34 289;ID=match$78_34_289;Name=SSF50494;status=T;Dbxref="InterPro:IPR009003"
g2011.t1_1	ProSitePatterns	protein_match	235	246	.	+	.	date=18-12-2020;Target=g2011.t1_1 235 246;ID=match$79_235_246;signature_desc=Serine proteases, trypsin family, serine active site.;Name=PS00135;status=T;Dbxref="InterPro:IPR033116"
g2011.t1_1	PANTHER	protein_match	3	289	1.4E-82	+	.	date=18-12-2020;Target=g2011.t1_1 3 289;ID=match$80_3_289;Name=PTHR24260:SF91;status=T
g2011.t1_1	PRINTS	protein_match	139	153	2.4E-13	+	.	date=18-12-2020;Target=g2011.t1_1 139 153;Ontology_term="GO:0004252","GO:0006508";ID=match$81_139_153;signature_desc=Chymotrypsin serine protease family (S1) signature;Name=PR00722;status=T;Dbxref="InterPro:IPR001314"
g2011.t1_1	PRINTS	protein_match	76	91	2.4E-13	+	.	date=18-12-2020;Target=g2011.t1_1 76 91;Ontology_term="GO:0004252","GO:0006508";ID=match$81_76_91;signature_desc=Chymotrypsin serine protease family (S1) signature;Name=PR00722;status=T;Dbxref="InterPro:IPR001314"
g2011.t1_1	PRINTS	protein_match	234	246	2.4E-13	+	.	date=18-12-2020;Target=g2011.t1_1 234 246;Ontology_term="GO:0004252","GO:0006508";ID=match$81_234_246;signature_desc=Chymotrypsin serine protease family (S1) signature;Name=PR00722;status=T;Dbxref="InterPro:IPR001314"
g2011.t1_1	Gene3D	protein_match	45	279	2.3E-65	+	.	date=18-12-2020;Target=g2011.t1_1 45 279;ID=match$82_45_279;Name=G3DSA:2.40.10.10;status=T;Dbxref="InterPro:IPR043504"
g2011.t1_1	ProSiteProfiles	protein_match	45	291	27.254	+	.	date=18-12-2020;Target=g2011.t1_1 45 291;Ontology_term="GO:0004252","GO:0006508";ID=match$83_45_291;signature_desc=Serine proteases, trypsin domain profile.;Name=PS50240;status=T;Dbxref="InterPro:IPR001254"
g2011.t1_1	SMART	protein_match	44	286	1.9E-75	+	.	date=18-12-2020;Target=g2011.t1_1 44 286;Ontology_term="GO:0004252","GO:0006508";ID=match$84_44_286;Name=SM00020;status=T;Dbxref="InterPro:IPR001254"
g6654.t1_1	.	polypeptide	1	118	.	+	.	ID=g6654.t1_1;md5=519324754cf119f4e3916029eca63d90
g6654.t1_1	Pfam	protein_match	36	117	7.3E-19	+	.	date=18-12-2020;Target=g6654.t1_1 36 117;ID=match$85_36_117;signature_desc=Carboxylesterase family;Name=PF00135;status=T;Dbxref="InterPro:IPR002018"
g6654.t1_1	MobiDBLite	protein_match	98	118	.	+	.	date=18-12-2020;Target=g6654.t1_1 98 118;ID=match$86_98_118;signature_desc=consensus disorder prediction;Name=mobidb-lite;status=T
g6654.t1_1	Gene3D	protein_match	3	118	6.2E-23	+	.	date=18-12-2020;Target=g6654.t1_1 3 118;ID=match$87_3_118;Name=G3DSA:3.40.50.1820;status=T;Dbxref="InterPro:IPR029058"
g6654.t1_1	PANTHER	protein_match	15	117	2.7E-19	+	.	date=18-12-2020;Target=g6654.t1_1 15 117;ID=match$88_15_117;Name=PTHR43142:SF1;status=T
g6654.t1_1	SUPERFAMILY	protein_match	36	117	2.82E-18	+	.	date=18-12-2020;Target=g6654.t1_1 36 117;ID=match$89_36_117;Name=SSF53474;status=T;Dbxref="InterPro:IPR029058"
g6654.t1_1	PANTHER	protein_match	15	117	2.7E-19	+	.	date=18-12-2020;Target=g6654.t1_1 15 117;ID=match$90_15_117;Name=PTHR43142;status=T
g15148.t1_1	.	polypeptide	1	499	.	+	.	ID=g15148.t1_1;md5=e83e4d3ec9e3595e1601d77ca9b855d1
g15148.t1_1	PIRSF	protein_match	48	490	1.3E-61	+	.	date=18-12-2020;Target=g15148.t1_1 48 490;Ontology_term="GO:0005337","GO:0016021","GO:1901642";ID=match$91_48_490;Name=PIRSF016379;status=T;Dbxref="InterPro:IPR002259"
g15148.t1_1	PRINTS	protein_match	207	229	6.9E-9	+	.	date=18-12-2020;Target=g15148.t1_1 207 229;Ontology_term="GO:0005337","GO:0016021","GO:1901642";ID=match$92_207_229;signature_desc=Delayed-early response protein/equilibrative nucleoside transporter signature;Name=PR01130;status=T;Dbxref="InterPro:IPR002259"
g15148.t1_1	PRINTS	protein_match	261	284	6.9E-9	+	.	date=18-12-2020;Target=g15148.t1_1 261 284;Ontology_term="GO:0005337","GO:0016021","GO:1901642";ID=match$92_261_284;signature_desc=Delayed-early response protein/equilibrative nucleoside transporter signature;Name=PR01130;status=T;Dbxref="InterPro:IPR002259"
g15148.t1_1	PRINTS	protein_match	235	255	6.9E-9	+	.	date=18-12-2020;Target=g15148.t1_1 235 255;Ontology_term="GO:0005337","GO:0016021","GO:1901642";ID=match$92_235_255;signature_desc=Delayed-early response protein/equilibrative nucleoside transporter signature;Name=PR01130;status=T;Dbxref="InterPro:IPR002259"
g15148.t1_1	PANTHER	protein_match	46	491	1.3E-189	+	.	date=18-12-2020;Target=g15148.t1_1 46 491;ID=match$93_46_491;Name=PTHR10332:SF80;status=T
g15148.t1_1	PANTHER	protein_match	46	491	1.3E-189	+	.	date=18-12-2020;Target=g15148.t1_1 46 491;Ontology_term="GO:0005337","GO:0016021","GO:1901642";ID=match$94_46_491;Name=PTHR10332;status=T;Dbxref="InterPro:IPR002259"
g15148.t1_1	Pfam	protein_match	201	485	1.5E-64	+	.	date=18-12-2020;Target=g15148.t1_1 201 485;Ontology_term="GO:0005337","GO:0016021","GO:1901642";ID=match$95_201_485;signature_desc=Nucleoside transporter;Name=PF01733;status=T;Dbxref="InterPro:IPR002259"
g15148.t1_1	SUPERFAMILY	protein_match	81	485	3.92E-10	+	.	date=18-12-2020;Target=g15148.t1_1 81 485;ID=match$96_81_485;Name=SSF103473;status=T;Dbxref="InterPro:IPR036259"
g11191.t1_1	.	polypeptide	1	1113	.	+	.	ID=g11191.t1_1;md5=e28244b26eb2ac405f2c3fd96e215689
g11191.t1_1	MobiDBLite	protein_match	380	408	.	+	.	date=18-12-2020;Target=g11191.t1_1 380 408;ID=match$97_380_408;signature_desc=consensus disorder prediction;Name=mobidb-lite;status=T
g11191.t1_1	MobiDBLite	protein_match	984	1022	.	+	.	date=18-12-2020;Target=g11191.t1_1 984 1022;ID=match$98_984_1022;signature_desc=consensus disorder prediction;Name=mobidb-lite;status=T
g11191.t1_1	MobiDBLite	protein_match	346	452	.	+	.	date=18-12-2020;Target=g11191.t1_1 346 452;ID=match$99_346_452;signature_desc=consensus disorder prediction;Name=mobidb-lite;status=T
g11191.t1_1	PANTHER	protein_match	21	842	0.0	+	.	date=18-12-2020;Target=g11191.t1_1 21 842;ID=match$100_21_842;Name=PTHR13865:SF28;status=T
g11191.t1_1	SUPERFAMILY	protein_match	21	122	2.23E-24	+	.	date=18-12-2020;Target=g11191.t1_1 21 122;Ontology_term="GO:0005515";ID=match$101_21_122;Name=SSF50156;status=T;Dbxref="InterPro:IPR036034"
g11191.t1_1	MobiDBLite	protein_match	984	1003	.	+	.	date=18-12-2020;Target=g11191.t1_1 984 1003;ID=match$102_984_1003;signature_desc=consensus disorder prediction;Name=mobidb-lite;status=T
g11191.t1_1	Pfam	protein_match	457	527	1.4E-13	+	.	date=18-12-2020;Target=g11191.t1_1 457 527;Ontology_term="GO:0005515";ID=match$103_457_527;signature_desc=PDZ domain;Name=PF00595;status=T;Dbxref="InterPro:IPR001478"
g11191.t1_1	Pfam	protein_match	36	119	1.2E-18	+	.	date=18-12-2020;Target=g11191.t1_1 36 119;Ontology_term="GO:0005515";ID=match$103_36_119;signature_desc=PDZ domain;Name=PF00595;status=T;Dbxref="InterPro:IPR001478"
g11191.t1_1	SUPERFAMILY	protein_match	210	292	5.78E-8	+	.	date=18-12-2020;Target=g11191.t1_1 210 292;Ontology_term="GO:0005515";ID=match$104_210_292;Name=SSF50156;status=T;Dbxref="InterPro:IPR036034"
g11191.t1_1	CDD	protein_match	450	527	4.93055E-18	+	.	date=18-12-2020;Target=g11191.t1_1 450 527;ID=match$105_450_527;signature_desc=PDZ_signaling;Name=cd00992;status=T
g11191.t1_1	SUPERFAMILY	protein_match	720	829	3.72E-17	+	.	date=18-12-2020;Target=g11191.t1_1 720 829;ID=match$106_720_829;Name=SSF52540;status=T;Dbxref="InterPro:IPR027417"
g11191.t1_1	ProSiteProfiles	protein_match	457	530	16.044	+	.	date=18-12-2020;Target=g11191.t1_1 457 530;Ontology_term="GO:0005515";ID=match$107_457_530;signature_desc=PDZ domain profile.;Name=PS50106;status=T;Dbxref="InterPro:IPR001478"
g11191.t1_1	CDD	protein_match	35	119	8.89756E-23	+	.	date=18-12-2020;Target=g11191.t1_1 35 119;ID=match$108_35_119;signature_desc=PDZ_signaling;Name=cd00992;status=T
g11191.t1_1	MobiDBLite	protein_match	931	963	.	+	.	date=18-12-2020;Target=g11191.t1_1 931 963;ID=match$109_931_963;signature_desc=consensus disorder prediction;Name=mobidb-lite;status=T
g11191.t1_1	MobiDBLite	protein_match	346	367	.	+	.	date=18-12-2020;Target=g11191.t1_1 346 367;ID=match$110_346_367;signature_desc=consensus disorder prediction;Name=mobidb-lite;status=T
g11191.t1_1	CDD	protein_match	546	607	1.96942E-35	+	.	date=18-12-2020;Target=g11191.t1_1 546 607;ID=match$111_546_607;signature_desc=SH3_ZO;Name=cd11859;status=T
g11191.t1_1	PANTHER	protein_match	21	842	0.0	+	.	date=18-12-2020;Target=g11191.t1_1 21 842;ID=match$112_21_842;Name=PTHR13865;status=T
g11191.t1_1	SUPERFAMILY	protein_match	545	611	5.08E-8	+	.	date=18-12-2020;Target=g11191.t1_1 545 611;Ontology_term="GO:0005515";ID=match$113_545_611;Name=SSF50044;status=T;Dbxref="InterPro:IPR036028"
g11191.t1_1	ProSiteProfiles	protein_match	542	610	12.486	+	.	date=18-12-2020;Target=g11191.t1_1 542 610;Ontology_term="GO:0005515";ID=match$114_542_610;signature_desc=Src homology 3 (SH3) domain profile.;Name=PS50002;status=T;Dbxref="InterPro:IPR001452"
g11191.t1_1	SMART	protein_match	459	530	3.1E-18	+	.	date=18-12-2020;Target=g11191.t1_1 459 530;Ontology_term="GO:0005515";ID=match$115_459_530;Name=SM00228;status=T;Dbxref="InterPro:IPR001478"
g11191.t1_1	SMART	protein_match	44	122	2.3E-17	+	.	date=18-12-2020;Target=g11191.t1_1 44 122;Ontology_term="GO:0005515";ID=match$115_44_122;Name=SM00228;status=T;Dbxref="InterPro:IPR001478"
g11191.t1_1	SMART	protein_match	146	291	0.37	+	.	date=18-12-2020;Target=g11191.t1_1 146 291;Ontology_term="GO:0005515";ID=match$115_146_291;Name=SM00228;status=T;Dbxref="InterPro:IPR001478"
g11191.t1_1	CDD	protein_match	208	288	3.68165E-6	+	.	date=18-12-2020;Target=g11191.t1_1 208 288;ID=match$116_208_288;signature_desc=PDZ_signaling;Name=cd00992;status=T
g11191.t1_1	SUPERFAMILY	protein_match	440	544	1.31E-26	+	.	date=18-12-2020;Target=g11191.t1_1 440 544;Ontology_term="GO:0005515";ID=match$117_440_544;Name=SSF50156;status=T;Dbxref="InterPro:IPR036034"
g11191.t1_1	Gene3D	protein_match	20	126	1.3E-31	+	.	date=18-12-2020;Target=g11191.t1_1 20 126;Ontology_term="GO:0005515";ID=match$118_20_126;Name=G3DSA:2.30.42.10;status=T;Dbxref="InterPro:IPR036034"
g11191.t1_1	Gene3D	protein_match	435	544	9.4E-25	+	.	date=18-12-2020;Target=g11191.t1_1 435 544;Ontology_term="GO:0005515";ID=match$119_435_544;Name=G3DSA:2.30.42.10;status=T;Dbxref="InterPro:IPR036034"
g11191.t1_1	Pfam	protein_match	546	607	3.4E-8	+	.	date=18-12-2020;Target=g11191.t1_1 546 607;Ontology_term="GO:0005515";ID=match$120_546_607;signature_desc=Variant SH3 domain;Name=PF07653;status=T;Dbxref="InterPro:IPR001452"
g11191.t1_1	ProSiteProfiles	protein_match	209	291	10.195	+	.	date=18-12-2020;Target=g11191.t1_1 209 291;Ontology_term="GO:0005515";ID=match$121_209_291;signature_desc=PDZ domain profile.;Name=PS50106;status=T;Dbxref="InterPro:IPR001478"
g11191.t1_1	SMART	protein_match	638	822	1.9E-44	+	.	date=18-12-2020;Target=g11191.t1_1 638 822;ID=match$122_638_822;Name=SM00072;status=T;Dbxref="InterPro:IPR008145"
g11191.t1_1	Pfam	protein_match	721	820	3.1E-12	+	.	date=18-12-2020;Target=g11191.t1_1 721 820;ID=match$123_721_820;signature_desc=Guanylate kinase;Name=PF00625;status=T;Dbxref="InterPro:IPR008145"
g11191.t1_1	ProSiteProfiles	protein_match	718	819	17.117	+	.	date=18-12-2020;Target=g11191.t1_1 718 819;ID=match$124_718_819;signature_desc=Guanylate kinase-like domain profile.;Name=PS50052;status=T;Dbxref="InterPro:IPR008144"
g11191.t1_1	ProSiteProfiles	protein_match	35	122	20.787	+	.	date=18-12-2020;Target=g11191.t1_1 35 122;Ontology_term="GO:0005515";ID=match$125_35_122;signature_desc=PDZ domain profile.;Name=PS50106;status=T;Dbxref="InterPro:IPR001478"
g11191.t1_1	Gene3D	protein_match	181	292	6.6E-11	+	.	date=18-12-2020;Target=g11191.t1_1 181 292;Ontology_term="GO:0005515";ID=match$126_181_292;Name=G3DSA:2.30.42.10;status=T;Dbxref="InterPro:IPR036034"
g1617.t1_1	.	polypeptide	1	113	.	+	.	ID=g1617.t1_1;md5=e9e66ab4f5963ac4bbda9a83699f47d7
g1617.t1_1	Pfam	protein_match	55	79	3.8E-5	+	.	date=18-12-2020;Target=g1617.t1_1 55 79;ID=match$127_55_79;signature_desc=Zinc finger, C2H2 type;Name=PF00096;status=T;Dbxref="InterPro:IPR013087"
g1617.t1_1	Pfam	protein_match	85	107	1.5E-4	+	.	date=18-12-2020;Target=g1617.t1_1 85 107;ID=match$127_85_107;signature_desc=Zinc finger, C2H2 type;Name=PF00096;status=T;Dbxref="InterPro:IPR013087"
g1617.t1_1	SUPERFAMILY	protein_match	53	107	4.43E-14	+	.	date=18-12-2020;Target=g1617.t1_1 53 107;ID=match$128_53_107;Name=SSF57667;status=T;Dbxref="InterPro:IPR036236"
g1617.t1_1	ProSitePatterns	protein_match	57	79	.	+	.	date=18-12-2020;Target=g1617.t1_1 57 79;ID=match$129_57_79;signature_desc=Zinc finger C2H2 type domain signature.;Name=PS00028;status=T;Dbxref="InterPro:IPR013087"
g1617.t1_1	ProSiteProfiles	protein_match	85	112	11.24	+	.	date=18-12-2020;Target=g1617.t1_1 85 112;ID=match$130_85_112;signature_desc=Zinc finger C2H2 type domain profile.;Name=PS50157;status=T;Dbxref="InterPro:IPR013087"
g1617.t1_1	Gene3D	protein_match	53	77	1.3E-14	+	.	date=18-12-2020;Target=g1617.t1_1 53 77;ID=match$131_53_77;Name=G3DSA:3.30.160.60;status=T
g1617.t1_1	ProSitePatterns	protein_match	87	107	.	+	.	date=18-12-2020;Target=g1617.t1_1 87 107;ID=match$132_87_107;signature_desc=Zinc finger C2H2 type domain signature.;Name=PS00028;status=T;Dbxref="InterPro:IPR013087"
g1617.t1_1	PANTHER	protein_match	50	112	6.0E-49	+	.	date=18-12-2020;Target=g1617.t1_1 50 112;ID=match$133_50_112;Name=PTHR23235;status=T
g1617.t1_1	ProSiteProfiles	protein_match	55	84	14.378	+	.	date=18-12-2020;Target=g1617.t1_1 55 84;ID=match$134_55_84;signature_desc=Zinc finger C2H2 type domain profile.;Name=PS50157;status=T;Dbxref="InterPro:IPR013087"
g1617.t1_1	PANTHER	protein_match	50	112	6.0E-49	+	.	date=18-12-2020;Target=g1617.t1_1 50 112;ID=match$135_50_112;Name=PTHR23235:SF100;status=T
g1617.t1_1	SMART	protein_match	55	79	0.0014	+	.	date=18-12-2020;Target=g1617.t1_1 55 79;ID=match$136_55_79;Name=SM00355;status=T;Dbxref="InterPro:IPR013087"
g1617.t1_1	SMART	protein_match	85	107	0.0019	+	.	date=18-12-2020;Target=g1617.t1_1 85 107;ID=match$136_85_107;Name=SM00355;status=T;Dbxref="InterPro:IPR013087"
g1617.t1_1	Gene3D	protein_match	78	113	4.5E-12	+	.	date=18-12-2020;Target=g1617.t1_1 78 113;ID=match$137_78_113;Name=G3DSA:3.30.160.60;status=T
g6022.t1_1	.	polypeptide	1	125	.	+	.	ID=g6022.t1_1;md5=86fe1c1e21c2cccd8a023ad09723359a
g6022.t1_1	Pfam	protein_match	1	71	1.1E-15	+	.	date=18-12-2020;Target=g6022.t1_1 1 71;ID=match$138_1_71;signature_desc=Protein of unknown function (DUF1295);Name=PF06966;status=T;Dbxref="InterPro:IPR010721"
g6022.t1_1	PANTHER	protein_match	1	71	1.6E-17	+	.	date=18-12-2020;Target=g6022.t1_1 1 71;ID=match$139_1_71;Name=PTHR32251;status=T;Dbxref="InterPro:IPR010721"
g6022.t1_1	PANTHER	protein_match	1	71	1.6E-17	+	.	date=18-12-2020;Target=g6022.t1_1 1 71;ID=match$140_1_71;Name=PTHR32251:SF15;status=T
g1289.t1_1	.	polypeptide	1	1165	.	+	.	ID=g1289.t1_1;md5=242586d743c9d8fe32d4b9ad22b9e0c5
g1289.t1_1	Pfam	protein_match	384	1154	2.6E-298	+	.	date=18-12-2020;Target=g1289.t1_1 384 1154;Ontology_term="GO:0015078","GO:0033179","GO:1902600";ID=match$141_384_1154;signature_desc=V-type ATPase 116kDa subunit family;Name=PF01496;status=T;Dbxref="InterPro:IPR002490"
g1289.t1_1	PANTHER	protein_match	357	1162	0.0	+	.	date=18-12-2020;Target=g1289.t1_1 357 1162;Ontology_term="GO:0015078","GO:0033179","GO:1902600";ID=match$142_357_1162;Name=PTHR11629;status=T;Dbxref="InterPro:IPR002490"
g1289.t1_1	Coils	protein_match	452	479	.	+	.	date=18-12-2020;Target=g1289.t1_1 452 479;ID=match$143_452_479;Name=Coil;status=T
g1289.t1_1	TIGRFAM	protein_match	4	340	3.2E-147	+	.	date=18-12-2020;Target=g1289.t1_1 4 340;ID=match$144_4_340;signature_desc=salvage_mtnA: S-methyl-5-thioribose-1-phosphate isomerase;Name=TIGR00512;status=T;Dbxref="InterPro:IPR005251"
g1289.t1_1	Gene3D	protein_match	1	156	2.0E-52	+	.	date=18-12-2020;Target=g1289.t1_1 1 156;ID=match$145_1_156;Name=G3DSA:1.20.120.420;status=T;Dbxref="InterPro:IPR027363"
g1289.t1_1	Pfam	protein_match	44	341	1.9E-82	+	.	date=18-12-2020;Target=g1289.t1_1 44 341;Ontology_term="GO:0044237";ID=match$146_44_341;signature_desc=Initiation factor 2 subunit family;Name=PF01008;status=T;Dbxref="InterPro:IPR000649"
g1289.t1_1	SUPERFAMILY	protein_match	3	346	4.12E-114	+	.	date=18-12-2020;Target=g1289.t1_1 3 346;ID=match$147_3_346;Name=SSF100950;status=T;Dbxref="InterPro:IPR037171"
g1289.t1_1	Hamap	protein_match	3	350	71.33313	+	.	date=18-12-2020;Target=g1289.t1_1 3 350;ID=match$148_3_350;signature_desc=Putative methylthioribose-1-phosphate isomerase [mtnA].;Name=MF_01678;status=T;Dbxref="InterPro:IPR005251"
g1289.t1_1	PANTHER	protein_match	357	1162	0.0	+	.	date=18-12-2020;Target=g1289.t1_1 357 1162;ID=match$149_357_1162;Name=PTHR11629:SF61;status=T
g1289.t1_1	Gene3D	protein_match	157	357	8.2E-71	+	.	date=18-12-2020;Target=g1289.t1_1 157 357;ID=match$150_157_357;Name=G3DSA:3.40.50.10470;status=T;Dbxref="InterPro:IPR042529"
g1289.t1_1	TIGRFAM	protein_match	32	340	1.7E-112	+	.	date=18-12-2020;Target=g1289.t1_1 32 340;Ontology_term="GO:0044249";ID=match$151_32_340;signature_desc=eIF-2B_rel: eIF-2B alpha/beta/delta-related uncharacterized proteins;Name=TIGR00524;status=T;Dbxref="InterPro:IPR011559"
g6144.t1_1	.	polypeptide	1	46	.	+	.	ID=g6144.t1_1;md5=bb1fc10e28f97bfae2b7d9300d9fbc90
g6144.t1_1	MobiDBLite	protein_match	24	46	.	+	.	date=18-12-2020;Target=g6144.t1_1 24 46;ID=match$152_24_46;signature_desc=consensus disorder prediction;Name=mobidb-lite;status=T
g529.t1_1	.	polypeptide	1	108	.	+	.	ID=g529.t1_1;md5=edd8fa47b3e45e2ac5f68ad80533a6b6
g529.t1_1	SMART	protein_match	5	102	3.7E-19	+	.	date=18-12-2020;Target=g529.t1_1 5 102;Ontology_term="GO:0005549";ID=match$153_5_102;Name=SM00708;status=T;Dbxref="InterPro:IPR006170"
g529.t1_1	PANTHER	protein_match	2	104	1.2E-42	+	.	date=18-12-2020;Target=g529.t1_1 2 104;ID=match$154_2_104;Name=PTHR11857:SF45;status=T
g529.t1_1	Gene3D	protein_match	1	107	9.4E-26	+	.	date=18-12-2020;Target=g529.t1_1 1 107;Ontology_term="GO:0005549";ID=match$155_1_107;Name=G3DSA:1.10.238.20;status=T;Dbxref="InterPro:IPR036728"
g529.t1_1	PRINTS	protein_match	85	103	2.7E-11	+	.	date=18-12-2020;Target=g529.t1_1 85 103;ID=match$156_85_103;signature_desc=Mealworm beetle B protein signature;Name=PR00485;status=T
g529.t1_1	PRINTS	protein_match	41	58	2.7E-11	+	.	date=18-12-2020;Target=g529.t1_1 41 58;ID=match$156_41_58;signature_desc=Mealworm beetle B protein signature;Name=PR00485;status=T
g529.t1_1	PRINTS	protein_match	9	21	2.7E-11	+	.	date=18-12-2020;Target=g529.t1_1 9 21;ID=match$156_9_21;signature_desc=Mealworm beetle B protein signature;Name=PR00485;status=T
g529.t1_1	SUPERFAMILY	protein_match	3	103	6.54E-28	+	.	date=18-12-2020;Target=g529.t1_1 3 103;Ontology_term="GO:0005549";ID=match$157_3_103;Name=SSF47565;status=T;Dbxref="InterPro:IPR036728"
g529.t1_1	PANTHER	protein_match	2	104	1.2E-42	+	.	date=18-12-2020;Target=g529.t1_1 2 104;ID=match$158_2_104;Name=PTHR11857;status=T
g529.t1_1	Pfam	protein_match	2	99	6.7E-20	+	.	date=18-12-2020;Target=g529.t1_1 2 99;Ontology_term="GO:0005549";ID=match$159_2_99;signature_desc=PBP/GOBP family;Name=PF01395;status=T;Dbxref="InterPro:IPR006170"
g8758.t1_1	.	polypeptide	1	780	.	+	.	ID=g8758.t1_1;md5=a8e1f76cdc4b38fb584507d629af9b88
g8758.t1_1	MobiDBLite	protein_match	1	30	.	+	.	date=18-12-2020;Target=g8758.t1_1 1 30;ID=match$160_1_30;signature_desc=consensus disorder prediction;Name=mobidb-lite;status=T
g17442.t1_1	.	polypeptide	1	606	.	+	.	ID=g17442.t1_1;md5=c51fe5fa7d3e8f808234efb33e4e14a1
g17442.t1_1	Pfam	protein_match	85	508	1.4E-91	+	.	date=18-12-2020;Target=g17442.t1_1 85 508;ID=match$161_85_508;signature_desc=AMP-binding enzyme;Name=PF00501;status=T;Dbxref="InterPro:IPR000873"
g17442.t1_1	PANTHER	protein_match	79	603	2.4E-144	+	.	date=18-12-2020;Target=g17442.t1_1 79 603;ID=match$162_79_603;Name=PTHR24096:SF312;status=T
g17442.t1_1	ProSitePatterns	protein_match	250	261	.	+	.	date=18-12-2020;Target=g17442.t1_1 250 261;ID=match$163_250_261;signature_desc=Putative AMP-binding domain signature.;Name=PS00455;status=T;Dbxref="InterPro:IPR020845"
g17442.t1_1	Pfam	protein_match	517	593	1.7E-18	+	.	date=18-12-2020;Target=g17442.t1_1 517 593;ID=match$164_517_593;signature_desc=AMP-binding enzyme C-terminal domain;Name=PF13193;status=T;Dbxref="InterPro:IPR025110"
g17442.t1_1	CDD	protein_match	99	595	0.0	+	.	date=18-12-2020;Target=g17442.t1_1 99 595;ID=match$165_99_595;signature_desc=Firefly_Luc_like;Name=cd05911;status=T
g17442.t1_1	Gene3D	protein_match	504	603	8.1E-33	+	.	date=18-12-2020;Target=g17442.t1_1 504 603;ID=match$166_504_603;Name=G3DSA:3.30.300.30;status=T
g17442.t1_1	SUPERFAMILY	protein_match	73	600	1.31E-131	+	.	date=18-12-2020;Target=g17442.t1_1 73 600;ID=match$167_73_600;Name=SSF56801;status=T
g17442.t1_1	Gene3D	protein_match	67	503	4.7E-116	+	.	date=18-12-2020;Target=g17442.t1_1 67 503;ID=match$168_67_503;Name=G3DSA:3.40.50.12780;status=T;Dbxref="InterPro:IPR042099"
g17442.t1_1	PANTHER	protein_match	79	603	2.4E-144	+	.	date=18-12-2020;Target=g17442.t1_1 79 603;ID=match$169_79_603;Name=PTHR24096;status=T
g15103.t1_1	.	polypeptide	1	78	.	+	.	ID=g15103.t1_1;md5=6d0ae62411bf195528d985b85da6caac
g15103.t1_1	Gene3D	protein_match	2	77	5.3E-8	+	.	date=18-12-2020;Target=g15103.t1_1 2 77;ID=match$170_2_77;Name=G3DSA:3.30.980.30;status=T
g149.t1_1	.	polypeptide	1	953	.	+	.	ID=g149.t1_1;md5=2a93b7c160f8fd1b9f0c1f4b9e361243
g149.t1_1	MobiDBLite	protein_match	938	953	.	+	.	date=18-12-2020;Target=g149.t1_1 938 953;ID=match$171_938_953;signature_desc=consensus disorder prediction;Name=mobidb-lite;status=T
g149.t1_1	ProSitePatterns	protein_match	833	853	.	+	.	date=18-12-2020;Target=g149.t1_1 833 853;ID=match$172_833_853;signature_desc=Zinc finger C2H2 type domain signature.;Name=PS00028;status=T;Dbxref="InterPro:IPR013087"
g149.t1_1	Coils	protein_match	436	456	.	+	.	date=18-12-2020;Target=g149.t1_1 436 456;ID=match$173_436_456;Name=Coil;status=T
g149.t1_1	MobiDBLite	protein_match	557	577	.	+	.	date=18-12-2020;Target=g149.t1_1 557 577;ID=match$174_557_577;signature_desc=consensus disorder prediction;Name=mobidb-lite;status=T
g149.t1_1	ProSiteProfiles	protein_match	831	858	11.967	+	.	date=18-12-2020;Target=g149.t1_1 831 858;ID=match$175_831_858;signature_desc=Zinc finger C2H2 type domain profile.;Name=PS50157;status=T;Dbxref="InterPro:IPR013087"
g149.t1_1	ProSiteProfiles	protein_match	773	802	16.082	+	.	date=18-12-2020;Target=g149.t1_1 773 802;ID=match$176_773_802;signature_desc=Zinc finger C2H2 type domain profile.;Name=PS50157;status=T;Dbxref="InterPro:IPR013087"
g149.t1_1	ProSitePatterns	protein_match	805	825	.	+	.	date=18-12-2020;Target=g149.t1_1 805 825;ID=match$177_805_825;signature_desc=Zinc finger C2H2 type domain signature.;Name=PS00028;status=T;Dbxref="InterPro:IPR013087"
g149.t1_1	MobiDBLite	protein_match	305	357	.	+	.	date=18-12-2020;Target=g149.t1_1 305 357;ID=match$178_305_357;signature_desc=consensus disorder prediction;Name=mobidb-lite;status=T
g149.t1_1	ProSiteProfiles	protein_match	803	830	16.498	+	.	date=18-12-2020;Target=g149.t1_1 803 830;ID=match$179_803_830;signature_desc=Zinc finger C2H2 type domain profile.;Name=PS50157;status=T;Dbxref="InterPro:IPR013087"
g149.t1_1	Gene3D	protein_match	831	865	9.1E-11	+	.	date=18-12-2020;Target=g149.t1_1 831 865;ID=match$180_831_865;Name=G3DSA:3.30.160.60;status=T
g149.t1_1	MobiDBLite	protein_match	1	28	.	+	.	date=18-12-2020;Target=g149.t1_1 1 28;ID=match$181_1_28;signature_desc=consensus disorder prediction;Name=mobidb-lite;status=T
g149.t1_1	SUPERFAMILY	protein_match	797	849	1.94E-16	+	.	date=18-12-2020;Target=g149.t1_1 797 849;ID=match$182_797_849;Name=SSF57667;status=T;Dbxref="InterPro:IPR036236"
g149.t1_1	PANTHER	protein_match	606	866	2.6E-126	+	.	date=18-12-2020;Target=g149.t1_1 606 866;ID=match$183_606_866;Name=PTHR23235;status=T
g149.t1_1	MobiDBLite	protein_match	212	228	.	+	.	date=18-12-2020;Target=g149.t1_1 212 228;ID=match$184_212_228;signature_desc=consensus disorder prediction;Name=mobidb-lite;status=T
g149.t1_1	MobiDBLite	protein_match	376	459	.	+	.	date=18-12-2020;Target=g149.t1_1 376 459;ID=match$185_376_459;signature_desc=consensus disorder prediction;Name=mobidb-lite;status=T
g149.t1_1	Gene3D	protein_match	770	799	5.1E-14	+	.	date=18-12-2020;Target=g149.t1_1 770 799;ID=match$186_770_799;Name=G3DSA:3.30.160.60;status=T
g149.t1_1	MobiDBLite	protein_match	867	907	.	+	.	date=18-12-2020;Target=g149.t1_1 867 907;ID=match$187_867_907;signature_desc=consensus disorder prediction;Name=mobidb-lite;status=T
g149.t1_1	ProSitePatterns	protein_match	775	797	.	+	.	date=18-12-2020;Target=g149.t1_1 775 797;ID=match$188_775_797;signature_desc=Zinc finger C2H2 type domain signature.;Name=PS00028;status=T;Dbxref="InterPro:IPR013087"
g149.t1_1	SUPERFAMILY	protein_match	765	812	1.03E-12	+	.	date=18-12-2020;Target=g149.t1_1 765 812;ID=match$189_765_812;Name=SSF57667;status=T;Dbxref="InterPro:IPR036236"
g149.t1_1	MobiDBLite	protein_match	229	286	.	+	.	date=18-12-2020;Target=g149.t1_1 229 286;ID=match$190_229_286;signature_desc=consensus disorder prediction;Name=mobidb-lite;status=T
g149.t1_1	MobiDBLite	protein_match	287	301	.	+	.	date=18-12-2020;Target=g149.t1_1 287 301;ID=match$191_287_301;signature_desc=consensus disorder prediction;Name=mobidb-lite;status=T
g149.t1_1	MobiDBLite	protein_match	908	925	.	+	.	date=18-12-2020;Target=g149.t1_1 908 925;ID=match$192_908_925;signature_desc=consensus disorder prediction;Name=mobidb-lite;status=T
g149.t1_1	MobiDBLite	protein_match	846	953	.	+	.	date=18-12-2020;Target=g149.t1_1 846 953;ID=match$193_846_953;signature_desc=consensus disorder prediction;Name=mobidb-lite;status=T
g149.t1_1	MobiDBLite	protein_match	554	598	.	+	.	date=18-12-2020;Target=g149.t1_1 554 598;ID=match$194_554_598;signature_desc=consensus disorder prediction;Name=mobidb-lite;status=T
g149.t1_1	PANTHER	protein_match	606	866	2.6E-126	+	.	date=18-12-2020;Target=g149.t1_1 606 866;ID=match$195_606_866;Name=PTHR23235:SF60;status=T
g149.t1_1	MobiDBLite	protein_match	176	459	.	+	.	date=18-12-2020;Target=g149.t1_1 176 459;ID=match$196_176_459;signature_desc=consensus disorder prediction;Name=mobidb-lite;status=T
g149.t1_1	Pfam	protein_match	831	853	0.0038	+	.	date=18-12-2020;Target=g149.t1_1 831 853;ID=match$197_831_853;signature_desc=Zinc finger, C2H2 type;Name=PF00096;status=T;Dbxref="InterPro:IPR013087"
g149.t1_1	Pfam	protein_match	803	825	3.2E-4	+	.	date=18-12-2020;Target=g149.t1_1 803 825;ID=match$197_803_825;signature_desc=Zinc finger, C2H2 type;Name=PF00096;status=T;Dbxref="InterPro:IPR013087"
g149.t1_1	Pfam	protein_match	773	797	2.5E-5	+	.	date=18-12-2020;Target=g149.t1_1 773 797;ID=match$197_773_797;signature_desc=Zinc finger, C2H2 type;Name=PF00096;status=T;Dbxref="InterPro:IPR013087"
g149.t1_1	Gene3D	protein_match	800	830	6.4E-15	+	.	date=18-12-2020;Target=g149.t1_1 800 830;ID=match$198_800_830;Name=G3DSA:3.30.160.60;status=T
g149.t1_1	SMART	protein_match	831	853	0.0086	+	.	date=18-12-2020;Target=g149.t1_1 831 853;ID=match$199_831_853;Name=SM00355;status=T;Dbxref="InterPro:IPR013087"
g149.t1_1	SMART	protein_match	803	825	0.0062	+	.	date=18-12-2020;Target=g149.t1_1 803 825;ID=match$199_803_825;Name=SM00355;status=T;Dbxref="InterPro:IPR013087"
g149.t1_1	SMART	protein_match	773	797	1.4E-4	+	.	date=18-12-2020;Target=g149.t1_1 773 797;ID=match$199_773_797;Name=SM00355;status=T;Dbxref="InterPro:IPR013087"
g17900.t1_1	.	polypeptide	1	1569	.	+	.	ID=g17900.t1_1;md5=01a78e5a6d3a316d7e480765a3e05225
g17900.t1_1	MobiDBLite	protein_match	798	816	.	+	.	date=18-12-2020;Target=g17900.t1_1 798 816;ID=match$200_798_816;signature_desc=consensus disorder prediction;Name=mobidb-lite;status=T
g17900.t1_1	MobiDBLite	protein_match	1342	1395	.	+	.	date=18-12-2020;Target=g17900.t1_1 1342 1395;ID=match$201_1342_1395;signature_desc=consensus disorder prediction;Name=mobidb-lite;status=T
g17900.t1_1	PANTHER	protein_match	477	704	3.7E-77	+	.	date=18-12-2020;Target=g17900.t1_1 477 704;ID=match$202_477_704;Name=PTHR21254;status=T
g17900.t1_1	PANTHER	protein_match	1178	1344	3.7E-77	+	.	date=18-12-2020;Target=g17900.t1_1 1178 1344;ID=match$202_1178_1344;Name=PTHR21254;status=T
g17900.t1_1	PANTHER	protein_match	1039	1155	3.7E-77	+	.	date=18-12-2020;Target=g17900.t1_1 1039 1155;ID=match$202_1039_1155;Name=PTHR21254;status=T
g17900.t1_1	MobiDBLite	protein_match	879	927	.	+	.	date=18-12-2020;Target=g17900.t1_1 879 927;ID=match$203_879_927;signature_desc=consensus disorder prediction;Name=mobidb-lite;status=T
g17900.t1_1	MobiDBLite	protein_match	687	738	.	+	.	date=18-12-2020;Target=g17900.t1_1 687 738;ID=match$204_687_738;signature_desc=consensus disorder prediction;Name=mobidb-lite;status=T
g17900.t1_1	MobiDBLite	protein_match	1468	1569	.	+	.	date=18-12-2020;Target=g17900.t1_1 1468 1569;ID=match$205_1468_1569;signature_desc=consensus disorder prediction;Name=mobidb-lite;status=T
g17900.t1_1	MobiDBLite	protein_match	687	719	.	+	.	date=18-12-2020;Target=g17900.t1_1 687 719;ID=match$206_687_719;signature_desc=consensus disorder prediction;Name=mobidb-lite;status=T
g17900.t1_1	MobiDBLite	protein_match	1342	1373	.	+	.	date=18-12-2020;Target=g17900.t1_1 1342 1373;ID=match$207_1342_1373;signature_desc=consensus disorder prediction;Name=mobidb-lite;status=T
g17900.t1_1	MobiDBLite	protein_match	462	529	.	+	.	date=18-12-2020;Target=g17900.t1_1 462 529;ID=match$208_462_529;signature_desc=consensus disorder prediction;Name=mobidb-lite;status=T
g17900.t1_1	MobiDBLite	protein_match	897	920	.	+	.	date=18-12-2020;Target=g17900.t1_1 897 920;ID=match$209_897_920;signature_desc=consensus disorder prediction;Name=mobidb-lite;status=T
g17900.t1_1	MobiDBLite	protein_match	1416	1439	.	+	.	date=18-12-2020;Target=g17900.t1_1 1416 1439;ID=match$210_1416_1439;signature_desc=consensus disorder prediction;Name=mobidb-lite;status=T
g17900.t1_1	MobiDBLite	protein_match	1532	1547	.	+	.	date=18-12-2020;Target=g17900.t1_1 1532 1547;ID=match$211_1532_1547;signature_desc=consensus disorder prediction;Name=mobidb-lite;status=T
g17900.t1_1	MobiDBLite	protein_match	1417	1439	.	+	.	date=18-12-2020;Target=g17900.t1_1 1417 1439;ID=match$212_1417_1439;signature_desc=consensus disorder prediction;Name=mobidb-lite;status=T
g17900.t1_1	MobiDBLite	protein_match	1379	1395	.	+	.	date=18-12-2020;Target=g17900.t1_1 1379 1395;ID=match$213_1379_1395;signature_desc=consensus disorder prediction;Name=mobidb-lite;status=T
g17900.t1_1	Coils	protein_match	177	178	.	+	.	date=18-12-2020;Target=g17900.t1_1 177 178;ID=match$214_177_178;Name=Coil;status=T
g17900.t1_1	MobiDBLite	protein_match	1480	1494	.	+	.	date=18-12-2020;Target=g17900.t1_1 1480 1494;ID=match$215_1480_1494;signature_desc=consensus disorder prediction;Name=mobidb-lite;status=T
g17900.t1_1	MobiDBLite	protein_match	798	841	.	+	.	date=18-12-2020;Target=g17900.t1_1 798 841;ID=match$216_798_841;signature_desc=consensus disorder prediction;Name=mobidb-lite;status=T
g17900.t1_1	MobiDBLite	protein_match	472	498	.	+	.	date=18-12-2020;Target=g17900.t1_1 472 498;ID=match$217_472_498;signature_desc=consensus disorder prediction;Name=mobidb-lite;status=T
g17900.t1_1	SUPERFAMILY	protein_match	936	1090	4.46E-5	+	.	date=18-12-2020;Target=g17900.t1_1 936 1090;ID=match$218_936_1090;Name=SSF49562;status=T
g17900.t1_1	Coils	protein_match	1314	1334	.	+	.	date=18-12-2020;Target=g17900.t1_1 1314 1334;ID=match$219_1314_1334;Name=Coil;status=T
g17900.t1_1	MobiDBLite	protein_match	823	837	.	+	.	date=18-12-2020;Target=g17900.t1_1 823 837;ID=match$220_823_837;signature_desc=consensus disorder prediction;Name=mobidb-lite;status=T
g17900.t1_1	MobiDBLite	protein_match	1549	1569	.	+	.	date=18-12-2020;Target=g17900.t1_1 1549 1569;ID=match$221_1549_1569;signature_desc=consensus disorder prediction;Name=mobidb-lite;status=T
g7854.t1_1	.	polypeptide	1	200	.	+	.	ID=g7854.t1_1;md5=e863296e0ceefc0285501ba2b80424f3
g7854.t1_1	MobiDBLite	protein_match	59	103	.	+	.	date=18-12-2020;Target=g7854.t1_1 59 103;ID=match$222_59_103;signature_desc=consensus disorder prediction;Name=mobidb-lite;status=T
g7854.t1_1	MobiDBLite	protein_match	76	91	.	+	.	date=18-12-2020;Target=g7854.t1_1 76 91;ID=match$223_76_91;signature_desc=consensus disorder prediction;Name=mobidb-lite;status=T
g9721.t1_1	.	polypeptide	1	403	.	+	.	ID=g9721.t1_1;md5=9cdc987e1440237320df5acc56ac98e0
g9721.t1_1	Gene3D	protein_match	3	118	7.1E-14	+	.	date=18-12-2020;Target=g9721.t1_1 3 118;ID=match$224_3_118;Name=G3DSA:3.40.30.10;status=T;Dbxref="InterPro:IPR036249"
g9721.t1_1	Pfam	protein_match	15	109	6.0E-8	+	.	date=18-12-2020;Target=g9721.t1_1 15 109;ID=match$225_15_109;signature_desc=Thioredoxin;Name=PF00085;status=T;Dbxref="InterPro:IPR013766"
g9721.t1_1	SUPERFAMILY	protein_match	14	112	9.31E-14	+	.	date=18-12-2020;Target=g9721.t1_1 14 112;ID=match$226_14_112;Name=SSF52833;status=T;Dbxref="InterPro:IPR036249"
g9721.t1_1	Pfam	protein_match	237	402	1.2E-42	+	.	date=18-12-2020;Target=g9721.t1_1 237 402;ID=match$227_237_402;signature_desc=Domain of unknown function (DUF4746);Name=PF15928;status=T;Dbxref="InterPro:IPR031827"
g9721.t1_1	PANTHER	protein_match	1	401	3.9E-86	+	.	date=18-12-2020;Target=g9721.t1_1 1 401;ID=match$228_1_401;Name=PTHR46135;status=T
g9721.t1_1	CDD	protein_match	11	112	9.1052E-45	+	.	date=18-12-2020;Target=g9721.t1_1 11 112;ID=match$229_11_112;signature_desc=TRX_NDPK;Name=cd02948;status=T
g9721.t1_1	ProSitePatterns	protein_match	31	49	.	+	.	date=18-12-2020;Target=g9721.t1_1 31 49;ID=match$230_31_49;signature_desc=Thioredoxin family active site.;Name=PS00194;status=T;Dbxref="InterPro:IPR017937"
g9721.t1_1	PANTHER	protein_match	1	401	3.9E-86	+	.	date=18-12-2020;Target=g9721.t1_1 1 401;ID=match$231_1_401;Name=PTHR46135:SF3;status=T
g9721.t1_1	Coils	protein_match	145	165	.	+	.	date=18-12-2020;Target=g9721.t1_1 145 165;ID=match$232_145_165;Name=Coil;status=T
g9938.t1_1	.	polypeptide	1	70	.	+	.	ID=g9938.t1_1;md5=bff93a2a8899e8b7d9d09d5003310e11
g9938.t1_1	PANTHER	protein_match	1	69	3.5E-13	+	.	date=18-12-2020;Target=g9938.t1_1 1 69;ID=match$233_1_69;Name=PTHR28388;status=T;Dbxref="InterPro:IPR029409"
g9938.t1_1	Pfam	protein_match	1	69	4.4E-12	+	.	date=18-12-2020;Target=g9938.t1_1 1 69;ID=match$234_1_69;signature_desc=Transmembrane protein 237;Name=PF15383;status=T;Dbxref="InterPro:IPR029409"
g17774.t1_1	.	polypeptide	1	517	.	+	.	ID=g17774.t1_1;md5=fb8a38706d8c9529cf40c519b0ab7221
g17774.t1_1	Pfam	protein_match	106	506	2.6E-81	+	.	date=18-12-2020;Target=g17774.t1_1 106 506;ID=match$235_106_506;signature_desc=Transmembrane amino acid transporter protein;Name=PF01490;status=T;Dbxref="InterPro:IPR013057"
g17774.t1_1	MobiDBLite	protein_match	73	95	.	+	.	date=18-12-2020;Target=g17774.t1_1 73 95;ID=match$236_73_95;signature_desc=consensus disorder prediction;Name=mobidb-lite;status=T
g17774.t1_1	MobiDBLite	protein_match	21	55	.	+	.	date=18-12-2020;Target=g17774.t1_1 21 55;ID=match$237_21_55;signature_desc=consensus disorder prediction;Name=mobidb-lite;status=T
g17774.t1_1	PANTHER	protein_match	64	510	1.8E-160	+	.	date=18-12-2020;Target=g17774.t1_1 64 510;ID=match$238_64_510;Name=PTHR22950:SF460;status=T
g17774.t1_1	PANTHER	protein_match	64	510	1.8E-160	+	.	date=18-12-2020;Target=g17774.t1_1 64 510;ID=match$239_64_510;Name=PTHR22950;status=T
g3341.t1_1	.	polypeptide	1	547	.	+	.	ID=g3341.t1_1;md5=fd875e8527f51284f26206b4621045b2
g3341.t1_1	SUPERFAMILY	protein_match	5	533	2.2E-113	+	.	date=18-12-2020;Target=g3341.t1_1 5 533;ID=match$240_5_533;Name=SSF53474;status=T;Dbxref="InterPro:IPR029058"
g3341.t1_1	Gene3D	protein_match	1	539	7.9E-149	+	.	date=18-12-2020;Target=g3341.t1_1 1 539;ID=match$241_1_539;Name=G3DSA:3.40.50.1820;status=T;Dbxref="InterPro:IPR029058"
g3341.t1_1	PANTHER	protein_match	6	540	4.9E-141	+	.	date=18-12-2020;Target=g3341.t1_1 6 540;ID=match$242_6_540;Name=PTHR11559;status=T
g3341.t1_1	PANTHER	protein_match	6	540	4.9E-141	+	.	date=18-12-2020;Target=g3341.t1_1 6 540;ID=match$243_6_540;Name=PTHR11559:SF405;status=T
g3341.t1_1	Pfam	protein_match	7	493	6.6E-118	+	.	date=18-12-2020;Target=g3341.t1_1 7 493;ID=match$244_7_493;signature_desc=Carboxylesterase family;Name=PF00135;status=T;Dbxref="InterPro:IPR002018"
g3341.t1_1	ProSitePatterns	protein_match	102	118	.	+	.	date=18-12-2020;Target=g3341.t1_1 102 118;Ontology_term="GO:0016787";ID=match$245_102_118;signature_desc=Lipolytic enzymes "G-D-X-G" family, putative histidine active site.;Name=PS01173;status=T;Dbxref="InterPro:IPR002168"
g3341.t1_1	ProSitePatterns	protein_match	175	190	.	+	.	date=18-12-2020;Target=g3341.t1_1 175 190;ID=match$246_175_190;signature_desc=Carboxylesterases type-B serine active site.;Name=PS00122;status=T;Dbxref="InterPro:IPR019826"
g4939.t1_1	.	polypeptide	1	185	.	+	.	ID=g4939.t1_1;md5=09c4d489ae6b4a3364200a8640002ddc
g4939.t1_1	MobiDBLite	protein_match	165	179	.	+	.	date=18-12-2020;Target=g4939.t1_1 165 179;ID=match$247_165_179;signature_desc=consensus disorder prediction;Name=mobidb-lite;status=T
g4939.t1_1	MobiDBLite	protein_match	150	185	.	+	.	date=18-12-2020;Target=g4939.t1_1 150 185;ID=match$248_150_185;signature_desc=consensus disorder prediction;Name=mobidb-lite;status=T
g12153.t1_1	.	polypeptide	1	184	.	+	.	ID=g12153.t1_1;md5=fb9951b32263963cd344fcaa4dd22826
g12153.t1_1	PANTHER	protein_match	12	182	2.1E-77	+	.	date=18-12-2020;Target=g12153.t1_1 12 182;ID=match$249_12_182;Name=PTHR10052;status=T;Dbxref="InterPro:IPR028877"
g12153.t1_1	Hamap	protein_match	13	76	21.278423	+	.	date=18-12-2020;Target=g12153.t1_1 13 76;ID=match$250_13_76;signature_desc=50S ribosomal protein L18Ae [rpl18a].;Name=MF_00273;status=T;Dbxref="InterPro:IPR028877"
g12153.t1_1	Gene3D	protein_match	79	154	1.5E-43	+	.	date=18-12-2020;Target=g12153.t1_1 79 154;ID=match$251_79_154;Name=G3DSA:3.10.20.10;status=T
g12153.t1_1	Gene3D	protein_match	9	78	5.1E-34	+	.	date=18-12-2020;Target=g12153.t1_1 9 78;ID=match$252_9_78;Name=G3DSA:3.10.20.10;status=T
g12153.t1_1	PANTHER	protein_match	12	182	2.1E-77	+	.	date=18-12-2020;Target=g12153.t1_1 12 182;ID=match$253_12_182;Name=PTHR10052:SF50;status=T
g12153.t1_1	Pfam	protein_match	13	136	1.9E-56	+	.	date=18-12-2020;Target=g12153.t1_1 13 136;Ontology_term="GO:0003735","GO:0005840","GO:0006412";ID=match$254_13_136;signature_desc=Ribosomal proteins 50S-L18Ae/60S-L20/60S-L18A;Name=PF01775;status=T;Dbxref="InterPro:IPR023573"
g12153.t1_1	SUPERFAMILY	protein_match	78	153	2.35E-27	+	.	date=18-12-2020;Target=g12153.t1_1 78 153;ID=match$255_78_153;Name=SSF160374;status=T
g12153.t1_1	PIRSF	protein_match	6	182	1.1E-72	+	.	date=18-12-2020;Target=g12153.t1_1 6 182;Ontology_term="GO:0003735","GO:0005840","GO:0006412";ID=match$256_6_182;Name=PIRSF002190;status=T;Dbxref="InterPro:IPR021138"
g17767.t1_1	.	polypeptide	1	199	.	+	.	ID=g17767.t1_1;md5=9a7deb08227b94a4b9486f6e9dcb6507
g17767.t1_1	MobiDBLite	protein_match	177	199	.	+	.	date=18-12-2020;Target=g17767.t1_1 177 199;ID=match$257_177_199;signature_desc=consensus disorder prediction;Name=mobidb-lite;status=T
g17767.t1_1	MobiDBLite	protein_match	82	109	.	+	.	date=18-12-2020;Target=g17767.t1_1 82 109;ID=match$258_82_109;signature_desc=consensus disorder prediction;Name=mobidb-lite;status=T
g17767.t1_1	MobiDBLite	protein_match	20	44	.	+	.	date=18-12-2020;Target=g17767.t1_1 20 44;ID=match$259_20_44;signature_desc=consensus disorder prediction;Name=mobidb-lite;status=T
g17767.t1_1	MobiDBLite	protein_match	92	109	.	+	.	date=18-12-2020;Target=g17767.t1_1 92 109;ID=match$260_92_109;signature_desc=consensus disorder prediction;Name=mobidb-lite;status=T
g8440.t1_1	.	polypeptide	1	1277	.	+	.	ID=g8440.t1_1;md5=b283423f232c3a5702fd38de0baea9e0
g8440.t1_1	Gene3D	protein_match	925	983	4.8E-17	+	.	date=18-12-2020;Target=g8440.t1_1 925 983;ID=match$261_925_983;Name=G3DSA:3.30.420.40;status=T
g8440.t1_1	Gene3D	protein_match	1003	1132	4.7E-66	+	.	date=18-12-2020;Target=g8440.t1_1 1003 1132;ID=match$262_1003_1132;Name=G3DSA:2.60.34.10;status=T;Dbxref="InterPro:IPR029047"
g8440.t1_1	ProSitePatterns	protein_match	957	971	.	+	.	date=18-12-2020;Target=g8440.t1_1 957 971;ID=match$263_957_971;signature_desc=Heat shock hsp70 proteins family signature 3.;Name=PS01036;status=T;Dbxref="InterPro:IPR018181"
g8440.t1_1	Gene3D	protein_match	786	815	2.7E-10	+	.	date=18-12-2020;Target=g8440.t1_1 786 815;ID=match$264_786_815;Name=G3DSA:3.30.420.40;status=T
g8440.t1_1	ProSitePatterns	protein_match	601	608	.	+	.	date=18-12-2020;Target=g8440.t1_1 601 608;ID=match$265_601_608;signature_desc=Heat shock hsp70 proteins family signature 1.;Name=PS00297;status=T;Dbxref="InterPro:IPR018181"
g8440.t1_1	Gene3D	protein_match	1133	1236	1.7E-39	+	.	date=18-12-2020;Target=g8440.t1_1 1133 1236;ID=match$266_1133_1236;Name=G3DSA:1.20.1270.10;status=T;Dbxref="InterPro:IPR029048"
g8440.t1_1	CDD	protein_match	598	1004	0.0	+	.	date=18-12-2020;Target=g8440.t1_1 598 1004;ID=match$267_598_1004;signature_desc=HSPA1-2_6-8-like_NBD;Name=cd10233;status=T
g8440.t1_1	Coils	protein_match	1135	1158	.	+	.	date=18-12-2020;Target=g8440.t1_1 1135 1158;ID=match$268_1135_1158;Name=Coil;status=T
g8440.t1_1	SUPERFAMILY	protein_match	784	810	4.62E-6	+	.	date=18-12-2020;Target=g8440.t1_1 784 810;ID=match$269_784_810;Name=SSF53067;status=T;Dbxref="InterPro:IPR043129"
g8440.t1_1	Pfam	protein_match	728	809	8.2E-9	+	.	date=18-12-2020;Target=g8440.t1_1 728 809;ID=match$270_728_809;signature_desc=MreB/Mbl protein;Name=PF06723;status=T
g8440.t1_1	SUPERFAMILY	protein_match	323	588	4.59E-54	+	.	date=18-12-2020;Target=g8440.t1_1 323 588;ID=match$271_323_588;Name=SSF56112;status=T;Dbxref="InterPro:IPR011009"
g8440.t1_1	Pfam	protein_match	357	588	3.2E-41	+	.	date=18-12-2020;Target=g8440.t1_1 357 588;Ontology_term="GO:0004672","GO:0005524","GO:0006468";ID=match$272_357_588;signature_desc=Protein kinase domain;Name=PF00069;status=T;Dbxref="InterPro:IPR000719"
g8440.t1_1	MobiDBLite	protein_match	266	322	.	+	.	date=18-12-2020;Target=g8440.t1_1 266 322;ID=match$273_266_322;signature_desc=consensus disorder prediction;Name=mobidb-lite;status=T
g8440.t1_1	ProSiteProfiles	protein_match	332	589	33.488	+	.	date=18-12-2020;Target=g8440.t1_1 332 589;Ontology_term="GO:0004672","GO:0005524","GO:0006468";ID=match$274_332_589;signature_desc=Protein kinase domain profile.;Name=PS50011;status=T;Dbxref="InterPro:IPR000719"
g8440.t1_1	SUPERFAMILY	protein_match	597	779	1.76E-72	+	.	date=18-12-2020;Target=g8440.t1_1 597 779;ID=match$275_597_779;Name=SSF53067;status=T;Dbxref="InterPro:IPR043129"
g8440.t1_1	SMART	protein_match	332	589	3.8E-43	+	.	date=18-12-2020;Target=g8440.t1_1 332 589;Ontology_term="GO:0004672","GO:0005524","GO:0006468";ID=match$276_332_589;Name=SM00220;status=T;Dbxref="InterPro:IPR000719"
g8440.t1_1	SUPERFAMILY	protein_match	1009	1166	6.02E-65	+	.	date=18-12-2020;Target=g8440.t1_1 1009 1166;ID=match$277_1009_1166;Name=SSF100920;status=T;Dbxref="InterPro:IPR029047"
g8440.t1_1	ProSitePatterns	protein_match	789	802	.	+	.	date=18-12-2020;Target=g8440.t1_1 789 802;ID=match$278_789_802;signature_desc=Heat shock hsp70 proteins family signature 2.;Name=PS00329;status=T;Dbxref="InterPro:IPR018181"
g8440.t1_1	Gene3D	protein_match	852	924	2.2E-29	+	.	date=18-12-2020;Target=g8440.t1_1 852 924;ID=match$279_852_924;Name=G3DSA:3.90.640.10;status=T
g8440.t1_1	MobiDBLite	protein_match	84	130	.	+	.	date=18-12-2020;Target=g8440.t1_1 84 130;ID=match$280_84_130;signature_desc=consensus disorder prediction;Name=mobidb-lite;status=T
g8440.t1_1	MobiDBLite	protein_match	63	133	.	+	.	date=18-12-2020;Target=g8440.t1_1 63 133;ID=match$281_63_133;signature_desc=consensus disorder prediction;Name=mobidb-lite;status=T
g8440.t1_1	Gene3D	protein_match	400	595	1.3E-43	+	.	date=18-12-2020;Target=g8440.t1_1 400 595;ID=match$282_400_595;Name=G3DSA:1.10.510.10;status=T
g8440.t1_1	Pfam	protein_match	811	1235	5.0E-166	+	.	date=18-12-2020;Target=g8440.t1_1 811 1235;Ontology_term="GO:0005524","GO:0016887";ID=match$283_811_1235;signature_desc=Hsp70 protein;Name=PF00012;status=T;Dbxref="InterPro:IPR013126"
g8440.t1_1	SUPERFAMILY	protein_match	1161	1242	1.1E-30	+	.	date=18-12-2020;Target=g8440.t1_1 1161 1242;ID=match$284_1161_1242;Name=SSF100934;status=T;Dbxref="InterPro:IPR029048"
g8440.t1_1	Gene3D	protein_match	660	710	4.0E-29	+	.	date=18-12-2020;Target=g8440.t1_1 660 710;ID=match$285_660_710;Name=G3DSA:3.30.30.30;status=T
g8440.t1_1	ProSitePatterns	protein_match	436	448	.	+	.	date=18-12-2020;Target=g8440.t1_1 436 448;Ontology_term="GO:0004672","GO:0006468";ID=match$286_436_448;signature_desc=Serine/Threonine protein kinases active-site signature.;Name=PS00108;status=T;Dbxref="InterPro:IPR008271"
g8440.t1_1	PANTHER	protein_match	813	1241	0.0	+	.	date=18-12-2020;Target=g8440.t1_1 813 1241;ID=match$287_813_1241;Name=PTHR19375:SF382;status=T
g8440.t1_1	Gene3D	protein_match	345	398	1.1E-6	+	.	date=18-12-2020;Target=g8440.t1_1 345 398;ID=match$288_345_398;Name=G3DSA:3.30.200.20;status=T
g8440.t1_1	PANTHER	protein_match	813	1241	0.0	+	.	date=18-12-2020;Target=g8440.t1_1 813 1241;Ontology_term="GO:0005524","GO:0016887";ID=match$289_813_1241;Name=PTHR19375;status=T;Dbxref="InterPro:IPR013126"
g8440.t1_1	PANTHER	protein_match	594	811	0.0	+	.	date=18-12-2020;Target=g8440.t1_1 594 811;Ontology_term="GO:0005524","GO:0016887";ID=match$289_594_811;Name=PTHR19375;status=T;Dbxref="InterPro:IPR013126"
g8440.t1_1	MobiDBLite	protein_match	1244	1277	.	+	.	date=18-12-2020;Target=g8440.t1_1 1244 1277;ID=match$290_1244_1277;signature_desc=consensus disorder prediction;Name=mobidb-lite;status=T
g8440.t1_1	PRINTS	protein_match	1013	1032	1.4E-80	+	.	date=18-12-2020;Target=g8440.t1_1 1013 1032;ID=match$291_1013_1032;signature_desc=70kDa heat shock protein signature;Name=PR00301;status=T
g8440.t1_1	PRINTS	protein_match	1094	1110	1.4E-80	+	.	date=18-12-2020;Target=g8440.t1_1 1094 1110;ID=match$291_1094_1110;signature_desc=70kDa heat shock protein signature;Name=PR00301;status=T
g8440.t1_1	PRINTS	protein_match	625	637	1.4E-80	+	.	date=18-12-2020;Target=g8440.t1_1 625 637;ID=match$291_625_637;signature_desc=70kDa heat shock protein signature;Name=PR00301;status=T
g8440.t1_1	PRINTS	protein_match	954	970	1.4E-80	+	.	date=18-12-2020;Target=g8440.t1_1 954 970;ID=match$291_954_970;signature_desc=70kDa heat shock protein signature;Name=PR00301;status=T
g8440.t1_1	PRINTS	protein_match	734	754	1.4E-80	+	.	date=18-12-2020;Target=g8440.t1_1 734 754;ID=match$291_734_754;signature_desc=70kDa heat shock protein signature;Name=PR00301;status=T
g8440.t1_1	PRINTS	protein_match	986	1006	1.4E-80	+	.	date=18-12-2020;Target=g8440.t1_1 986 1006;ID=match$291_986_1006;signature_desc=70kDa heat shock protein signature;Name=PR00301;status=T
g8440.t1_1	PRINTS	protein_match	597	610	1.4E-80	+	.	date=18-12-2020;Target=g8440.t1_1 597 610;ID=match$291_597_610;signature_desc=70kDa heat shock protein signature;Name=PR00301;status=T
g8440.t1_1	PRINTS	protein_match	647	655	1.4E-80	+	.	date=18-12-2020;Target=g8440.t1_1 647 655;ID=match$291_647_655;signature_desc=70kDa heat shock protein signature;Name=PR00301;status=T
g8440.t1_1	ProSitePatterns	protein_match	820	833	.	+	.	date=18-12-2020;Target=g8440.t1_1 820 833;ID=match$292_820_833;signature_desc=Heat shock hsp70 proteins family signature 2.;Name=PS00329;status=T;Dbxref="InterPro:IPR018181"
g8440.t1_1	PANTHER	protein_match	594	811	0.0	+	.	date=18-12-2020;Target=g8440.t1_1 594 811;ID=match$293_594_811;Name=PTHR19375:SF382;status=T
g8440.t1_1	SUPERFAMILY	protein_match	814	1005	2.1E-69	+	.	date=18-12-2020;Target=g8440.t1_1 814 1005;ID=match$294_814_1005;Name=SSF53067;status=T;Dbxref="InterPro:IPR043129"
g10033.t1_1	.	polypeptide	1	81	.	+	.	ID=g10033.t1_1;md5=163b2797177015697528500ab7ec5b79
g10033.t1_1	Pfam	protein_match	6	80	1.5E-16	+	.	date=18-12-2020;Target=g10033.t1_1 6 80;Ontology_term="GO:0005515";ID=match$295_6_80;signature_desc=BTB/POZ domain;Name=PF00651;status=T;Dbxref="InterPro:IPR000210"
g10033.t1_1	Gene3D	protein_match	2	81	7.3E-21	+	.	date=18-12-2020;Target=g10033.t1_1 2 81;ID=match$296_2_81;Name=G3DSA:3.30.710.10;status=T
g10033.t1_1	PANTHER	protein_match	2	81	8.2E-22	+	.	date=18-12-2020;Target=g10033.t1_1 2 81;ID=match$297_2_81;Name=PTHR45774:SF4;status=T
g10033.t1_1	ProSiteProfiles	protein_match	13	81	19.051	+	.	date=18-12-2020;Target=g10033.t1_1 13 81;Ontology_term="GO:0005515";ID=match$298_13_81;signature_desc=BTB domain profile.;Name=PS50097;status=T;Dbxref="InterPro:IPR000210"
g10033.t1_1	SUPERFAMILY	protein_match	5	81	4.51E-21	+	.	date=18-12-2020;Target=g10033.t1_1 5 81;ID=match$299_5_81;Name=SSF54695;status=T;Dbxref="InterPro:IPR011333"
g10033.t1_1	PANTHER	protein_match	2	81	8.2E-22	+	.	date=18-12-2020;Target=g10033.t1_1 2 81;ID=match$300_2_81;Name=PTHR45774;status=T
g14024.t1_1	.	polypeptide	1	98	.	+	.	ID=g14024.t1_1;md5=ba3887368dc7cc45053eec61948c6645
g14024.t1_1	Coils	protein_match	84	92	.	+	.	date=18-12-2020;Target=g14024.t1_1 84 92;ID=match$301_84_92;Name=Coil;status=T
g14024.t1_1	Coils	protein_match	97	97	.	+	.	date=18-12-2020;Target=g14024.t1_1 97 97;ID=match$302_97_97;Name=Coil;status=T
g15300.t1_1	.	polypeptide	1	413	.	+	.	ID=g15300.t1_1;md5=911e82862eeda054911a7bb4b0eb308e
g15300.t1_1	Gene3D	protein_match	17	394	1.9E-158	+	.	date=18-12-2020;Target=g15300.t1_1 17 394;Ontology_term="GO:0006400","GO:0016763";ID=match$303_17_394;Name=G3DSA:3.20.20.105;status=T;Dbxref="InterPro:IPR036511"
g15300.t1_1	Pfam	protein_match	39	389	1.8E-148	+	.	date=18-12-2020;Target=g15300.t1_1 39 389;Ontology_term="GO:0006400","GO:0016763";ID=match$304_39_389;signature_desc=Queuine tRNA-ribosyltransferase;Name=PF01702;status=T;Dbxref="InterPro:IPR002616"
g15300.t1_1	SUPERFAMILY	protein_match	29	389	3.4E-141	+	.	date=18-12-2020;Target=g15300.t1_1 29 389;Ontology_term="GO:0006400","GO:0016763";ID=match$305_29_389;Name=SSF51713;status=T;Dbxref="InterPro:IPR036511"
g15300.t1_1	MobiDBLite	protein_match	1	25	.	+	.	date=18-12-2020;Target=g15300.t1_1 1 25;ID=match$306_1_25;signature_desc=consensus disorder prediction;Name=mobidb-lite;status=T
g15300.t1_1	Hamap	protein_match	27	390	52.372253	+	.	date=18-12-2020;Target=g15300.t1_1 27 390;Ontology_term="GO:0008479","GO:0101030";ID=match$307_27_390;signature_desc=Queuine tRNA-ribosyltransferase [tgt].;Name=MF_00168;status=T;Dbxref="InterPro:IPR004803"
g15300.t1_1	PANTHER	protein_match	26	412	4.7E-188	+	.	date=18-12-2020;Target=g15300.t1_1 26 412;ID=match$308_26_412;Name=PTHR43530;status=T
g15300.t1_1	TIGRFAM	protein_match	31	388	2.1E-127	+	.	date=18-12-2020;Target=g15300.t1_1 31 388;Ontology_term="GO:0006400","GO:0016763";ID=match$309_31_388;signature_desc=tgt_general: tRNA-guanine family transglycosylase;Name=TIGR00449;status=T;Dbxref="InterPro:IPR002616"
g15300.t1_1	TIGRFAM	protein_match	37	389	1.4E-132	+	.	date=18-12-2020;Target=g15300.t1_1 37 389;Ontology_term="GO:0008479","GO:0101030";ID=match$310_37_389;signature_desc=Q_tRNA_tgt: tRNA-guanine transglycosylase;Name=TIGR00430;status=T;Dbxref="InterPro:IPR004803"
g3943.t1_1	.	polypeptide	1	130	.	+	.	ID=g3943.t1_1;md5=72675eff2db8df4cf7556e612a9a55e9
g3943.t1_1	SUPERFAMILY	protein_match	5	80	1.1E-24	+	.	date=18-12-2020;Target=g3943.t1_1 5 80;ID=match$311_5_80;Name=SSF110857;status=T;Dbxref="InterPro:IPR036568"
g3943.t1_1	CDD	protein_match	8	79	4.80788E-14	+	.	date=18-12-2020;Target=g3943.t1_1 8 79;ID=match$312_8_79;signature_desc=GGCT_like;Name=cd06661;status=T;Dbxref="InterPro:IPR013024"
g3943.t1_1	PANTHER	protein_match	5	80	9.7E-25	+	.	date=18-12-2020;Target=g3943.t1_1 5 80;ID=match$313_5_80;Name=PTHR12510:SF4;status=T
g3943.t1_1	Gene3D	protein_match	1	82	1.8E-26	+	.	date=18-12-2020;Target=g3943.t1_1 1 82;ID=match$314_1_82;Name=G3DSA:3.10.490.10;status=T
g3943.t1_1	PANTHER	protein_match	5	80	9.7E-25	+	.	date=18-12-2020;Target=g3943.t1_1 5 80;Ontology_term="GO:0061929";ID=match$315_5_80;Name=PTHR12510;status=T;Dbxref="InterPro:IPR039126"
g3943.t1_1	MobiDBLite	protein_match	102	130	.	+	.	date=18-12-2020;Target=g3943.t1_1 102 130;ID=match$316_102_130;signature_desc=consensus disorder prediction;Name=mobidb-lite;status=T
g3943.t1_1	Pfam	protein_match	8	79	5.1E-13	+	.	date=18-12-2020;Target=g3943.t1_1 8 79;ID=match$317_8_79;signature_desc=Gamma-glutamyl cyclotransferase, AIG2-like;Name=PF06094;status=T;Dbxref="InterPro:IPR009288"
g3349.t1_1	.	polypeptide	1	685	.	+	.	ID=g3349.t1_1;md5=a86ec4d1bb960e781b1273ba9431d9cb
g3349.t1_1	Gene3D	protein_match	302	476	2.8E-53	+	.	date=18-12-2020;Target=g3349.t1_1 302 476;ID=match$318_302_476;Name=G3DSA:1.20.140.10;status=T
g3349.t1_1	SUPERFAMILY	protein_match	300	474	8.52E-47	+	.	date=18-12-2020;Target=g3349.t1_1 300 474;Ontology_term="GO:0016627","GO:0055114";ID=match$319_300_474;Name=SSF47203;status=T;Dbxref="InterPro:IPR036250"
g3349.t1_1	PIRSF	protein_match	7	683	2.1E-181	+	.	date=18-12-2020;Target=g3349.t1_1 7 683;Ontology_term="GO:0003997","GO:0005777","GO:0006631","GO:0071949";ID=match$320_7_683;Name=PIRSF000168;status=T;Dbxref="InterPro:IPR012258"
g3349.t1_1	Pfam	protein_match	503	676	1.3E-46	+	.	date=18-12-2020;Target=g3349.t1_1 503 676;Ontology_term="GO:0003997","GO:0005777","GO:0006635";ID=match$321_503_676;signature_desc=Acyl-CoA oxidase;Name=PF01756;status=T;Dbxref="InterPro:IPR002655"
g3349.t1_1	Gene3D	protein_match	501	633	5.5E-13	+	.	date=18-12-2020;Target=g3349.t1_1 501 633;ID=match$322_501_633;Name=G3DSA:1.20.140.10;status=T
g3349.t1_1	SUPERFAMILY	protein_match	501	676	1.65E-48	+	.	date=18-12-2020;Target=g3349.t1_1 501 676;Ontology_term="GO:0016627","GO:0055114";ID=match$323_501_676;Name=SSF47203;status=T;Dbxref="InterPro:IPR036250"
g3349.t1_1	Pfam	protein_match	155	265	2.2E-19	+	.	date=18-12-2020;Target=g3349.t1_1 155 265;Ontology_term="GO:0016627","GO:0055114";ID=match$324_155_265;signature_desc=Acyl-CoA dehydrogenase, middle domain;Name=PF02770;status=T;Dbxref="InterPro:IPR006091"
g3349.t1_1	PANTHER	protein_match	3	684	0.0	+	.	date=18-12-2020;Target=g3349.t1_1 3 684;ID=match$325_3_684;Name=PTHR10909;status=T
g3349.t1_1	SUPERFAMILY	protein_match	20	281	1.31E-46	+	.	date=18-12-2020;Target=g3349.t1_1 20 281;Ontology_term="GO:0016627","GO:0055114";ID=match$326_20_281;Name=SSF56645;status=T;Dbxref="InterPro:IPR009100"
g3349.t1_1	Coils	protein_match	67	87	.	+	.	date=18-12-2020;Target=g3349.t1_1 67 87;ID=match$327_67_87;Name=Coil;status=T
g3349.t1_1	Gene3D	protein_match	155	292	1.3E-47	+	.	date=18-12-2020;Target=g3349.t1_1 155 292;ID=match$328_155_292;Name=G3DSA:2.40.110.10;status=T
g3349.t1_1	PANTHER	protein_match	3	684	0.0	+	.	date=18-12-2020;Target=g3349.t1_1 3 684;ID=match$329_3_684;Name=PTHR10909:SF223;status=T
g13970.t1_1	.	polypeptide	1	457	.	+	.	ID=g13970.t1_1;md5=7c020ce2553ef6d4d34eae1dfd56dc46
g13970.t1_1	PANTHER	protein_match	53	370	7.1E-53	+	.	date=18-12-2020;Target=g13970.t1_1 53 370;ID=match$330_53_370;Name=PTHR46953;status=T
g13970.t1_1	PANTHER	protein_match	53	370	7.1E-53	+	.	date=18-12-2020;Target=g13970.t1_1 53 370;ID=match$331_53_370;Name=PTHR46953:SF1;status=T
g1337.t1_1	.	polypeptide	1	240	.	+	.	ID=g1337.t1_1;md5=5e2219334e6ca158e3ea3b3aef176a48
g1337.t1_1	PANTHER	protein_match	1	222	3.3E-33	+	.	date=18-12-2020;Target=g1337.t1_1 1 222;ID=match$332_1_222;Name=PTHR24240:SF165;status=T
g1337.t1_1	Gene3D	protein_match	1	201	1.4E-16	+	.	date=18-12-2020;Target=g1337.t1_1 1 201;ID=match$333_1_201;Name=G3DSA:1.20.1070.10;status=T
g1337.t1_1	PRINTS	protein_match	24	45	1.8E-7	+	.	date=18-12-2020;Target=g1337.t1_1 24 45;Ontology_term="GO:0004930","GO:0007186","GO:0016021";ID=match$334_24_45;signature_desc=Rhodopsin-like GPCR superfamily signature;Name=PR00237;status=T;Dbxref="InterPro:IPR000276"
g1337.t1_1	PRINTS	protein_match	111	135	1.8E-7	+	.	date=18-12-2020;Target=g1337.t1_1 111 135;Ontology_term="GO:0004930","GO:0007186","GO:0016021";ID=match$334_111_135;signature_desc=Rhodopsin-like GPCR superfamily signature;Name=PR00237;status=T;Dbxref="InterPro:IPR000276"
g1337.t1_1	PRINTS	protein_match	64	87	1.8E-7	+	.	date=18-12-2020;Target=g1337.t1_1 64 87;Ontology_term="GO:0004930","GO:0007186","GO:0016021";ID=match$334_64_87;signature_desc=Rhodopsin-like GPCR superfamily signature;Name=PR00237;status=T;Dbxref="InterPro:IPR000276"
g1337.t1_1	PRINTS	protein_match	146	172	1.8E-7	+	.	date=18-12-2020;Target=g1337.t1_1 146 172;Ontology_term="GO:0004930","GO:0007186","GO:0016021";ID=match$334_146_172;signature_desc=Rhodopsin-like GPCR superfamily signature;Name=PR00237;status=T;Dbxref="InterPro:IPR000276"
g1337.t1_1	SUPERFAMILY	protein_match	1	189	1.92E-16	+	.	date=18-12-2020;Target=g1337.t1_1 1 189;ID=match$335_1_189;Name=SSF81321;status=T
g1337.t1_1	ProSiteProfiles	protein_match	1	164	13.07	+	.	date=18-12-2020;Target=g1337.t1_1 1 164;Ontology_term="GO:0016021";ID=match$336_1_164;signature_desc=G-protein coupled receptors family 1 profile.;Name=PS50262;status=T;Dbxref="InterPro:IPR017452"
g1337.t1_1	PANTHER	protein_match	1	222	3.3E-33	+	.	date=18-12-2020;Target=g1337.t1_1 1 222;ID=match$337_1_222;Name=PTHR24240;status=T
g17220.t1_1	.	polypeptide	1	140	.	+	.	ID=g17220.t1_1;md5=b04f1c27252636f192339b8878fecba7
g17220.t1_1	SUPERFAMILY	protein_match	23	77	1.98E-10	+	.	date=18-12-2020;Target=g17220.t1_1 23 77;ID=match$338_23_77;Name=SSF57667;status=T;Dbxref="InterPro:IPR036236"
g17220.t1_1	SMART	protein_match	40	63	0.025	+	.	date=18-12-2020;Target=g17220.t1_1 40 63;ID=match$339_40_63;Name=SM00355;status=T;Dbxref="InterPro:IPR013087"
g17220.t1_1	SMART	protein_match	12	33	18.0	+	.	date=18-12-2020;Target=g17220.t1_1 12 33;ID=match$339_12_33;Name=SM00355;status=T;Dbxref="InterPro:IPR013087"
g17220.t1_1	SMART	protein_match	98	121	0.025	+	.	date=18-12-2020;Target=g17220.t1_1 98 121;ID=match$339_98_121;Name=SM00355;status=T;Dbxref="InterPro:IPR013087"
g17220.t1_1	SMART	protein_match	69	92	0.031	+	.	date=18-12-2020;Target=g17220.t1_1 69 92;ID=match$339_69_92;Name=SM00355;status=T;Dbxref="InterPro:IPR013087"
g17220.t1_1	Gene3D	protein_match	63	93	1.1E-6	+	.	date=18-12-2020;Target=g17220.t1_1 63 93;ID=match$340_63_93;Name=G3DSA:3.30.160.60;status=T
g17220.t1_1	ProSitePatterns	protein_match	100	121	.	+	.	date=18-12-2020;Target=g17220.t1_1 100 121;ID=match$341_100_121;signature_desc=Zinc finger C2H2 type domain signature.;Name=PS00028;status=T;Dbxref="InterPro:IPR013087"
g17220.t1_1	Pfam	protein_match	69	92	0.0033	+	.	date=18-12-2020;Target=g17220.t1_1 69 92;ID=match$342_69_92;signature_desc=Zinc finger, C2H2 type;Name=PF00096;status=T;Dbxref="InterPro:IPR013087"
g17220.t1_1	Pfam	protein_match	98	121	0.0019	+	.	date=18-12-2020;Target=g17220.t1_1 98 121;ID=match$342_98_121;signature_desc=Zinc finger, C2H2 type;Name=PF00096;status=T;Dbxref="InterPro:IPR013087"
g17220.t1_1	Pfam	protein_match	42	63	0.001	+	.	date=18-12-2020;Target=g17220.t1_1 42 63;ID=match$342_42_63;signature_desc=Zinc finger, C2H2 type;Name=PF00096;status=T;Dbxref="InterPro:IPR013087"
g17220.t1_1	PANTHER	protein_match	42	136	3.0E-31	+	.	date=18-12-2020;Target=g17220.t1_1 42 136;ID=match$343_42_136;Name=PTHR24390:SF92;status=T
g17220.t1_1	SUPERFAMILY	protein_match	63	116	4.42E-13	+	.	date=18-12-2020;Target=g17220.t1_1 63 116;ID=match$344_63_116;Name=SSF57667;status=T;Dbxref="InterPro:IPR036236"
g17220.t1_1	Gene3D	protein_match	1	62	1.9E-10	+	.	date=18-12-2020;Target=g17220.t1_1 1 62;ID=match$345_1_62;Name=G3DSA:3.30.160.60;status=T
g17220.t1_1	ProSiteProfiles	protein_match	98	126	12.341	+	.	date=18-12-2020;Target=g17220.t1_1 98 126;ID=match$346_98_126;signature_desc=Zinc finger C2H2 type domain profile.;Name=PS50157;status=T;Dbxref="InterPro:IPR013087"
g17220.t1_1	ProSiteProfiles	protein_match	40	68	10.887	+	.	date=18-12-2020;Target=g17220.t1_1 40 68;ID=match$347_40_68;signature_desc=Zinc finger C2H2 type domain profile.;Name=PS50157;status=T;Dbxref="InterPro:IPR013087"
g17220.t1_1	PANTHER	protein_match	42	136	3.0E-31	+	.	date=18-12-2020;Target=g17220.t1_1 42 136;ID=match$348_42_136;Name=PTHR24390;status=T
g17220.t1_1	ProSitePatterns	protein_match	42	63	.	+	.	date=18-12-2020;Target=g17220.t1_1 42 63;ID=match$349_42_63;signature_desc=Zinc finger C2H2 type domain signature.;Name=PS00028;status=T;Dbxref="InterPro:IPR013087"
g17220.t1_1	PANTHER	protein_match	10	109	3.0E-31	+	.	date=18-12-2020;Target=g17220.t1_1 10 109;ID=match$350_10_109;Name=PTHR24390;status=T
g17220.t1_1	Gene3D	protein_match	94	140	9.8E-10	+	.	date=18-12-2020;Target=g17220.t1_1 94 140;ID=match$351_94_140;Name=G3DSA:3.30.160.60;status=T
g17220.t1_1	ProSitePatterns	protein_match	71	92	.	+	.	date=18-12-2020;Target=g17220.t1_1 71 92;ID=match$352_71_92;signature_desc=Zinc finger C2H2 type domain signature.;Name=PS00028;status=T;Dbxref="InterPro:IPR013087"
g17220.t1_1	ProSiteProfiles	protein_match	69	97	11.468	+	.	date=18-12-2020;Target=g17220.t1_1 69 97;ID=match$353_69_97;signature_desc=Zinc finger C2H2 type domain profile.;Name=PS50157;status=T;Dbxref="InterPro:IPR013087"
g17220.t1_1	PANTHER	protein_match	10	109	3.0E-31	+	.	date=18-12-2020;Target=g17220.t1_1 10 109;ID=match$354_10_109;Name=PTHR24390:SF92;status=T
g10198.t1_1	.	polypeptide	1	203	.	+	.	ID=g10198.t1_1;md5=12770d3b549319da33fecd6832ed14b7
g10198.t1_1	Coils	protein_match	111	131	.	+	.	date=18-12-2020;Target=g10198.t1_1 111 131;ID=match$355_111_131;Name=Coil;status=T
g2744.t1_1	.	polypeptide	1	543	.	+	.	ID=g2744.t1_1;md5=d595a24fa599089030cf4ddb34555157
g2744.t1_1	MobiDBLite	protein_match	75	104	.	+	.	date=18-12-2020;Target=g2744.t1_1 75 104;ID=match$356_75_104;signature_desc=consensus disorder prediction;Name=mobidb-lite;status=T
g2744.t1_1	Pfam	protein_match	144	217	1.8E-15	+	.	date=18-12-2020;Target=g2744.t1_1 144 217;Ontology_term="GO:0005634","GO:0008270";ID=match$357_144_217;signature_desc=Zinc-finger associated domain (zf-AD);Name=PF07776;status=T;Dbxref="InterPro:IPR012934"
g2744.t1_1	SUPERFAMILY	protein_match	143	218	1.41E-10	+	.	date=18-12-2020;Target=g2744.t1_1 143 218;ID=match$358_143_218;Name=SSF57716;status=T
g2744.t1_1	MobiDBLite	protein_match	1	50	.	+	.	date=18-12-2020;Target=g2744.t1_1 1 50;ID=match$359_1_50;signature_desc=consensus disorder prediction;Name=mobidb-lite;status=T
g2744.t1_1	Pfam	protein_match	419	503	4.5E-20	+	.	date=18-12-2020;Target=g2744.t1_1 419 503;ID=match$360_419_503;signature_desc=Domain of unknown function (DUF4806);Name=PF16064;status=T;Dbxref="InterPro:IPR032071"
g2744.t1_1	SMART	protein_match	143	220	1.1E-6	+	.	date=18-12-2020;Target=g2744.t1_1 143 220;Ontology_term="GO:0005634","GO:0008270";ID=match$361_143_220;Name=SM00868;status=T;Dbxref="InterPro:IPR012934"
g15827.t1_1	.	polypeptide	1	537	.	+	.	ID=g15827.t1_1;md5=10ee18243b4cfafd78e51a987d12bce2
g15827.t1_1	PANTHER	protein_match	18	503	2.9E-130	+	.	date=18-12-2020;Target=g15827.t1_1 18 503;ID=match$362_18_503;Name=PTHR48043;status=T
g15827.t1_1	CDD	protein_match	29	458	1.21101E-74	+	.	date=18-12-2020;Target=g15827.t1_1 29 458;ID=match$363_29_458;signature_desc=GT1_Gtf-like;Name=cd03784;status=T
g15827.t1_1	Gene3D	protein_match	277	446	2.5E-49	+	.	date=18-12-2020;Target=g15827.t1_1 277 446;ID=match$364_277_446;Name=G3DSA:3.40.50.2000;status=T
g15827.t1_1	PANTHER	protein_match	18	503	2.9E-130	+	.	date=18-12-2020;Target=g15827.t1_1 18 503;ID=match$365_18_503;Name=PTHR48043:SF114;status=T
g15827.t1_1	Pfam	protein_match	136	499	1.1E-78	+	.	date=18-12-2020;Target=g15827.t1_1 136 499;Ontology_term="GO:0008194";ID=match$366_136_499;signature_desc=UDP-glucoronosyl and UDP-glucosyl transferase;Name=PF00201;status=T;Dbxref="InterPro:IPR002213"
g15827.t1_1	ProSitePatterns	protein_match	351	394	.	+	.	date=18-12-2020;Target=g15827.t1_1 351 394;ID=match$367_351_394;signature_desc=UDP-glycosyltransferases signature.;Name=PS00375;status=T;Dbxref="InterPro:IPR035595"
g15827.t1_1	SUPERFAMILY	protein_match	30	471	9.42E-112	+	.	date=18-12-2020;Target=g15827.t1_1 30 471;ID=match$368_30_471;Name=SSF53756;status=T
g15827.t1_1	Gene3D	protein_match	28	259	5.8E-5	+	.	date=18-12-2020;Target=g15827.t1_1 28 259;ID=match$369_28_259;Name=G3DSA:3.40.50.2000;status=T
g261.t1_1	.	polypeptide	1	1204	.	+	.	ID=g261.t1_1;md5=d00104670730f9f7807b01966b82f11b
g261.t1_1	MobiDBLite	protein_match	922	962	.	+	.	date=18-12-2020;Target=g261.t1_1 922 962;ID=match$370_922_962;signature_desc=consensus disorder prediction;Name=mobidb-lite;status=T
g261.t1_1	MobiDBLite	protein_match	632	735	.	+	.	date=18-12-2020;Target=g261.t1_1 632 735;ID=match$371_632_735;signature_desc=consensus disorder prediction;Name=mobidb-lite;status=T
g261.t1_1	MobiDBLite	protein_match	399	427	.	+	.	date=18-12-2020;Target=g261.t1_1 399 427;ID=match$372_399_427;signature_desc=consensus disorder prediction;Name=mobidb-lite;status=T
g261.t1_1	MobiDBLite	protein_match	386	485	.	+	.	date=18-12-2020;Target=g261.t1_1 386 485;ID=match$373_386_485;signature_desc=consensus disorder prediction;Name=mobidb-lite;status=T
g261.t1_1	MobiDBLite	protein_match	354	372	.	+	.	date=18-12-2020;Target=g261.t1_1 354 372;ID=match$374_354_372;signature_desc=consensus disorder prediction;Name=mobidb-lite;status=T
g261.t1_1	MobiDBLite	protein_match	889	1136	.	+	.	date=18-12-2020;Target=g261.t1_1 889 1136;ID=match$375_889_1136;signature_desc=consensus disorder prediction;Name=mobidb-lite;status=T
g261.t1_1	MobiDBLite	protein_match	754	845	.	+	.	date=18-12-2020;Target=g261.t1_1 754 845;ID=match$376_754_845;signature_desc=consensus disorder prediction;Name=mobidb-lite;status=T
g261.t1_1	MobiDBLite	protein_match	1	20	.	+	.	date=18-12-2020;Target=g261.t1_1 1 20;ID=match$377_1_20;signature_desc=consensus disorder prediction;Name=mobidb-lite;status=T
g261.t1_1	MobiDBLite	protein_match	243	317	.	+	.	date=18-12-2020;Target=g261.t1_1 243 317;ID=match$378_243_317;signature_desc=consensus disorder prediction;Name=mobidb-lite;status=T
g261.t1_1	MobiDBLite	protein_match	977	1003	.	+	.	date=18-12-2020;Target=g261.t1_1 977 1003;ID=match$379_977_1003;signature_desc=consensus disorder prediction;Name=mobidb-lite;status=T
g261.t1_1	MobiDBLite	protein_match	83	117	.	+	.	date=18-12-2020;Target=g261.t1_1 83 117;ID=match$380_83_117;signature_desc=consensus disorder prediction;Name=mobidb-lite;status=T
g261.t1_1	MobiDBLite	protein_match	344	374	.	+	.	date=18-12-2020;Target=g261.t1_1 344 374;ID=match$381_344_374;signature_desc=consensus disorder prediction;Name=mobidb-lite;status=T
g261.t1_1	MobiDBLite	protein_match	445	481	.	+	.	date=18-12-2020;Target=g261.t1_1 445 481;ID=match$382_445_481;signature_desc=consensus disorder prediction;Name=mobidb-lite;status=T
g6828.t1_1	.	polypeptide	1	124	.	+	.	ID=g6828.t1_1;md5=1a57aa51a4e4ee3e8ade8f2efd877cb5
g6828.t1_1	MobiDBLite	protein_match	76	97	.	+	.	date=18-12-2020;Target=g6828.t1_1 76 97;ID=match$383_76_97;signature_desc=consensus disorder prediction;Name=mobidb-lite;status=T
g6828.t1_1	MobiDBLite	protein_match	1	20	.	+	.	date=18-12-2020;Target=g6828.t1_1 1 20;ID=match$384_1_20;signature_desc=consensus disorder prediction;Name=mobidb-lite;status=T
g6828.t1_1	MobiDBLite	protein_match	1	59	.	+	.	date=18-12-2020;Target=g6828.t1_1 1 59;ID=match$385_1_59;signature_desc=consensus disorder prediction;Name=mobidb-lite;status=T
g5698.t1_1	.	polypeptide	1	117	.	+	.	ID=g5698.t1_1;md5=d3ddd439e7614c277a41b8307664af66
g5698.t1_1	SUPERFAMILY	protein_match	13	106	2.8E-35	+	.	date=18-12-2020;Target=g5698.t1_1 13 106;ID=match$386_13_106;Name=SSF55315;status=T;Dbxref="InterPro:IPR029064"
g5698.t1_1	PANTHER	protein_match	1	111	1.9E-60	+	.	date=18-12-2020;Target=g5698.t1_1 1 111;Ontology_term="GO:0003723";ID=match$387_1_111;Name=PTHR11449;status=T;Dbxref="InterPro:IPR039109"
g5698.t1_1	Gene3D	protein_match	1	105	4.7E-54	+	.	date=18-12-2020;Target=g5698.t1_1 1 105;ID=match$388_1_105;Name=G3DSA:3.30.1330.30;status=T;Dbxref="InterPro:IPR029064"
g5698.t1_1	PANTHER	protein_match	1	111	1.9E-60	+	.	date=18-12-2020;Target=g5698.t1_1 1 111;Ontology_term="GO:0003723","GO:0003735","GO:0022625";ID=match$389_1_111;Name=PTHR11449:SF12;status=T;Dbxref="InterPro:IPR000231"
g5698.t1_1	Hamap	protein_match	12	109	21.485332	+	.	date=18-12-2020;Target=g5698.t1_1 12 109;Ontology_term="GO:0003723","GO:0003735","GO:0022625";ID=match$390_12_109;signature_desc=50S ribosomal protein L30e [rpl30e].;Name=MF_00481;status=T;Dbxref="InterPro:IPR000231"
g5698.t1_1	Pfam	protein_match	13	105	4.4E-25	+	.	date=18-12-2020;Target=g5698.t1_1 13 105;ID=match$391_13_105;signature_desc=Ribosomal protein L7Ae/L30e/S12e/Gadd45 family;Name=PF01248;status=T;Dbxref="InterPro:IPR004038"
g5698.t1_1	ProSitePatterns	protein_match	80	100	.	+	.	date=18-12-2020;Target=g5698.t1_1 80 100;ID=match$392_80_100;signature_desc=Ribosomal protein L30e signature 2.;Name=PS00993;status=T;Dbxref="InterPro:IPR022991"
g5698.t1_1	ProSitePatterns	protein_match	24	48	.	+	.	date=18-12-2020;Target=g5698.t1_1 24 48;ID=match$393_24_48;signature_desc=Ribosomal protein L30e signature 1.;Name=PS00709;status=T;Dbxref="InterPro:IPR022991"
g14270.t1_1	.	polypeptide	1	211	.	+	.	ID=g14270.t1_1;md5=4ac4e599f3e2ef74346a77d9609eaa61
g14270.t1_1	Hamap	protein_match	3	192	30.170696	+	.	date=18-12-2020;Target=g14270.t1_1 3 192;Ontology_term="GO:0004385","GO:0006163";ID=match$394_3_192;signature_desc=Guanylate kinase [gmk].;Name=MF_00328;status=T;Dbxref="InterPro:IPR017665"
g14270.t1_1	ProSitePatterns	protein_match	41	58	.	+	.	date=18-12-2020;Target=g14270.t1_1 41 58;ID=match$395_41_58;signature_desc=Guanylate kinase-like signature.;Name=PS00856;status=T;Dbxref="InterPro:IPR020590"
g14270.t1_1	Gene3D	protein_match	10	184	1.8E-73	+	.	date=18-12-2020;Target=g14270.t1_1 10 184;ID=match$396_10_184;Name=G3DSA:3.40.50.300;status=T
g14270.t1_1	Coils	protein_match	130	150	.	+	.	date=18-12-2020;Target=g14270.t1_1 130 150;ID=match$397_130_150;Name=Coil;status=T
g14270.t1_1	ProSiteProfiles	protein_match	6	189	45.136	+	.	date=18-12-2020;Target=g14270.t1_1 6 189;ID=match$398_6_189;signature_desc=Guanylate kinase-like domain profile.;Name=PS50052;status=T;Dbxref="InterPro:IPR008144"
g14270.t1_1	PANTHER	protein_match	4	201	4.5E-92	+	.	date=18-12-2020;Target=g14270.t1_1 4 201;ID=match$399_4_201;Name=PTHR23117;status=T
g14270.t1_1	CDD	protein_match	8	185	9.77122E-70	+	.	date=18-12-2020;Target=g14270.t1_1 8 185;ID=match$400_8_185;signature_desc=GMPK;Name=cd00071;status=T
g14270.t1_1	SUPERFAMILY	protein_match	5	191	3.69E-67	+	.	date=18-12-2020;Target=g14270.t1_1 5 191;ID=match$401_5_191;Name=SSF52540;status=T;Dbxref="InterPro:IPR027417"
g14270.t1_1	Pfam	protein_match	7	189	5.2E-65	+	.	date=18-12-2020;Target=g14270.t1_1 7 189;ID=match$402_7_189;signature_desc=Guanylate kinase;Name=PF00625;status=T;Dbxref="InterPro:IPR008145"
g14270.t1_1	SMART	protein_match	5	192	1.6E-84	+	.	date=18-12-2020;Target=g14270.t1_1 5 192;ID=match$403_5_192;Name=SM00072;status=T;Dbxref="InterPro:IPR008145"
g14270.t1_1	TIGRFAM	protein_match	8	188	1.7E-62	+	.	date=18-12-2020;Target=g14270.t1_1 8 188;Ontology_term="GO:0004385","GO:0006163";ID=match$404_8_188;signature_desc=guanyl_kin: guanylate kinase;Name=TIGR03263;status=T;Dbxref="InterPro:IPR017665"
g14270.t1_1	Gene3D	protein_match	38	97	1.8E-73	+	.	date=18-12-2020;Target=g14270.t1_1 38 97;ID=match$405_38_97;Name=G3DSA:3.30.63.10;status=T
g3313.t1_1	.	polypeptide	1	74	.	+	.	ID=g3313.t1_1;md5=09d09d24c55ae45fa77e363ef4855cdb
g3313.t1_1	MobiDBLite	protein_match	31	66	.	+	.	date=18-12-2020;Target=g3313.t1_1 31 66;ID=match$406_31_66;signature_desc=consensus disorder prediction;Name=mobidb-lite;status=T
g3313.t1_1	MobiDBLite	protein_match	1	74	.	+	.	date=18-12-2020;Target=g3313.t1_1 1 74;ID=match$407_1_74;signature_desc=consensus disorder prediction;Name=mobidb-lite;status=T
g9460.t1_1	.	polypeptide	1	164	.	+	.	ID=g9460.t1_1;md5=89b0e05917683c4c17ff5b17e72bc27d
g9460.t1_1	ProSitePatterns	protein_match	94	120	.	+	.	date=18-12-2020;Target=g9460.t1_1 94 120;ID=match$408_94_120;signature_desc=Chitin-binding type R&R domain signature.;Name=PS00233;status=T;Dbxref="InterPro:IPR031311"
g9460.t1_1	PRINTS	protein_match	103	114	6.9E-6	+	.	date=18-12-2020;Target=g9460.t1_1 103 114;Ontology_term="GO:0042302";ID=match$409_103_114;signature_desc=Insect cuticle protein signature;Name=PR00947;status=T;Dbxref="InterPro:IPR000618"
g9460.t1_1	PRINTS	protein_match	92	103	6.9E-6	+	.	date=18-12-2020;Target=g9460.t1_1 92 103;Ontology_term="GO:0042302";ID=match$409_92_103;signature_desc=Insect cuticle protein signature;Name=PR00947;status=T;Dbxref="InterPro:IPR000618"
g9460.t1_1	PRINTS	protein_match	64	75	6.9E-6	+	.	date=18-12-2020;Target=g9460.t1_1 64 75;Ontology_term="GO:0042302";ID=match$409_64_75;signature_desc=Insect cuticle protein signature;Name=PR00947;status=T;Dbxref="InterPro:IPR000618"
g9460.t1_1	PANTHER	protein_match	6	125	2.7E-32	+	.	date=18-12-2020;Target=g9460.t1_1 6 125;ID=match$410_6_125;Name=PTHR12236:SF76;status=T
g9460.t1_1	ProSiteProfiles	protein_match	63	134	13.842	+	.	date=18-12-2020;Target=g9460.t1_1 63 134;Ontology_term="GO:0042302";ID=match$411_63_134;signature_desc=Chitin-binding type R&R domain profile.;Name=PS51155;status=T;Dbxref="InterPro:IPR000618"
g9460.t1_1	Pfam	protein_match	66	118	1.7E-11	+	.	date=18-12-2020;Target=g9460.t1_1 66 118;Ontology_term="GO:0042302";ID=match$412_66_118;signature_desc=Insect cuticle protein;Name=PF00379;status=T;Dbxref="InterPro:IPR000618"
g9460.t1_1	PANTHER	protein_match	6	125	2.7E-32	+	.	date=18-12-2020;Target=g9460.t1_1 6 125;ID=match$413_6_125;Name=PTHR12236;status=T
g4439.t1_1	.	polypeptide	1	261	.	+	.	ID=g4439.t1_1;md5=9d3d3bcc1085ec72edb712ef2f55c135
g4439.t1_1	SUPERFAMILY	protein_match	84	247	1.7E-57	+	.	date=18-12-2020;Target=g4439.t1_1 84 247;ID=match$414_84_247;Name=SSF56496;status=T;Dbxref="InterPro:IPR036056"
g4439.t1_1	SMART	protein_match	86	259	3.0E-36	+	.	date=18-12-2020;Target=g4439.t1_1 86 259;ID=match$415_86_259;Name=SM00186;status=T;Dbxref="InterPro:IPR002181"
g4439.t1_1	CDD	protein_match	86	248	3.42685E-70	+	.	date=18-12-2020;Target=g4439.t1_1 86 248;ID=match$416_86_248;signature_desc=FReD;Name=cd00087;status=T;Dbxref="InterPro:IPR002181"
g4439.t1_1	ProSiteProfiles	protein_match	82	261	41.27	+	.	date=18-12-2020;Target=g4439.t1_1 82 261;ID=match$417_82_261;signature_desc=Fibrinogen C-terminal domain profile.;Name=PS51406;status=T;Dbxref="InterPro:IPR002181"
g4439.t1_1	Gene3D	protein_match	87	222	3.3E-45	+	.	date=18-12-2020;Target=g4439.t1_1 87 222;ID=match$418_87_222;Name=G3DSA:3.90.215.10;status=T;Dbxref="InterPro:IPR014716"
g4439.t1_1	PANTHER	protein_match	80	248	3.1E-49	+	.	date=18-12-2020;Target=g4439.t1_1 80 248;ID=match$419_80_248;Name=PTHR19143;status=T
g4439.t1_1	Gene3D	protein_match	223	250	7.8E-6	+	.	date=18-12-2020;Target=g4439.t1_1 223 250;ID=match$420_223_250;Name=G3DSA:4.10.530.10;status=T;Dbxref="InterPro:IPR014715"
g4439.t1_1	Pfam	protein_match	96	248	3.2E-42	+	.	date=18-12-2020;Target=g4439.t1_1 96 248;ID=match$421_96_248;signature_desc=Fibrinogen beta and gamma chains, C-terminal globular domain;Name=PF00147;status=T;Dbxref="InterPro:IPR002181"
g4439.t1_1	PANTHER	protein_match	80	248	3.1E-49	+	.	date=18-12-2020;Target=g4439.t1_1 80 248;ID=match$422_80_248;Name=PTHR19143:SF209;status=T
g2244.t1_1	.	polypeptide	1	313	.	+	.	ID=g2244.t1_1;md5=f6ecae6a91586a78115270fc4ce381aa
g2244.t1_1	Gene3D	protein_match	1	264	1.3E-88	+	.	date=18-12-2020;Target=g2244.t1_1 1 264;ID=match$423_1_264;Name=G3DSA:3.90.180.10;status=T
g2244.t1_1	Pfam	protein_match	111	241	1.3E-17	+	.	date=18-12-2020;Target=g2244.t1_1 111 241;ID=match$424_111_241;signature_desc=Zinc-binding dehydrogenase;Name=PF13602;status=T
g2244.t1_1	PANTHER	protein_match	1	312	7.2E-150	+	.	date=18-12-2020;Target=g2244.t1_1 1 312;ID=match$425_1_312;Name=PTHR43775:SF23;status=T
g2244.t1_1	Pfam	protein_match	268	311	9.5E-6	+	.	date=18-12-2020;Target=g2244.t1_1 268 311;ID=match$426_268_311;signature_desc=KR domain;Name=PF08659;status=T;Dbxref="InterPro:IPR013968"
g2244.t1_1	PANTHER	protein_match	1	312	7.2E-150	+	.	date=18-12-2020;Target=g2244.t1_1 1 312;ID=match$427_1_312;Name=PTHR43775;status=T
g2244.t1_1	SMART	protein_match	2	241	1.1E-73	+	.	date=18-12-2020;Target=g2244.t1_1 2 241;Ontology_term="GO:0016491";ID=match$428_2_241;Name=SM00829;status=T;Dbxref="InterPro:IPR020843"
g2244.t1_1	SUPERFAMILY	protein_match	30	206	1.57E-37	+	.	date=18-12-2020;Target=g2244.t1_1 30 206;ID=match$429_30_206;Name=SSF51735;status=T;Dbxref="InterPro:IPR036291"
g2244.t1_1	CDD	protein_match	1	241	1.69264E-98	+	.	date=18-12-2020;Target=g2244.t1_1 1 241;ID=match$430_1_241;signature_desc=enoyl_red;Name=cd05195;status=T
g10852.t1_1	.	polypeptide	1	42	.	+	.	ID=g10852.t1_1;md5=225227e0dca7603c61a317ac34b7cfc6
g10852.t1_1	MobiDBLite	protein_match	14	42	.	+	.	date=18-12-2020;Target=g10852.t1_1 14 42;ID=match$431_14_42;signature_desc=consensus disorder prediction;Name=mobidb-lite;status=T
g10852.t1_1	Coils	protein_match	1	42	.	+	.	date=18-12-2020;Target=g10852.t1_1 1 42;ID=match$432_1_42;Name=Coil;status=T
g12244.t1_1	.	polypeptide	1	106	.	+	.	ID=g12244.t1_1;md5=3740af36b7b535b9206c16bb6db9e388
g12244.t1_1	Pfam	protein_match	23	104	2.1E-15	+	.	date=18-12-2020;Target=g12244.t1_1 23 104;ID=match$433_23_104;signature_desc=SCP-2 sterol transfer family;Name=PF02036;status=T;Dbxref="InterPro:IPR003033"
g12244.t1_1	PANTHER	protein_match	4	105	4.1E-16	+	.	date=18-12-2020;Target=g12244.t1_1 4 105;ID=match$434_4_105;Name=PTHR10094:SF25;status=T
g12244.t1_1	Gene3D	protein_match	1	106	4.9E-29	+	.	date=18-12-2020;Target=g12244.t1_1 1 106;ID=match$435_1_106;Name=G3DSA:3.30.1050.10;status=T;Dbxref="InterPro:IPR036527"
g12244.t1_1	SUPERFAMILY	protein_match	2	105	2.1E-21	+	.	date=18-12-2020;Target=g12244.t1_1 2 105;ID=match$436_2_105;Name=SSF55718;status=T;Dbxref="InterPro:IPR036527"
g12244.t1_1	PANTHER	protein_match	4	105	4.1E-16	+	.	date=18-12-2020;Target=g12244.t1_1 4 105;ID=match$437_4_105;Name=PTHR10094;status=T;Dbxref="InterPro:IPR039543"
g18106.t1_1	.	polypeptide	1	1101	.	+	.	ID=g18106.t1_1;md5=8b9fd64d563ca0c7425ab9f4766975d8
g18106.t1_1	Coils	protein_match	488	515	.	+	.	date=18-12-2020;Target=g18106.t1_1 488 515;ID=match$438_488_515;Name=Coil;status=T
g18106.t1_1	MobiDBLite	protein_match	982	1009	.	+	.	date=18-12-2020;Target=g18106.t1_1 982 1009;ID=match$439_982_1009;signature_desc=consensus disorder prediction;Name=mobidb-lite;status=T
g18106.t1_1	MobiDBLite	protein_match	221	253	.	+	.	date=18-12-2020;Target=g18106.t1_1 221 253;ID=match$440_221_253;signature_desc=consensus disorder prediction;Name=mobidb-lite;status=T
g18106.t1_1	MobiDBLite	protein_match	1	253	.	+	.	date=18-12-2020;Target=g18106.t1_1 1 253;ID=match$441_1_253;signature_desc=consensus disorder prediction;Name=mobidb-lite;status=T
g18106.t1_1	MobiDBLite	protein_match	15	54	.	+	.	date=18-12-2020;Target=g18106.t1_1 15 54;ID=match$442_15_54;signature_desc=consensus disorder prediction;Name=mobidb-lite;status=T
g18106.t1_1	Coils	protein_match	544	581	.	+	.	date=18-12-2020;Target=g18106.t1_1 544 581;ID=match$443_544_581;Name=Coil;status=T
g18106.t1_1	MobiDBLite	protein_match	833	859	.	+	.	date=18-12-2020;Target=g18106.t1_1 833 859;ID=match$444_833_859;signature_desc=consensus disorder prediction;Name=mobidb-lite;status=T
g18106.t1_1	Coils	protein_match	643	670	.	+	.	date=18-12-2020;Target=g18106.t1_1 643 670;ID=match$445_643_670;Name=Coil;status=T
g18106.t1_1	Coils	protein_match	888	908	.	+	.	date=18-12-2020;Target=g18106.t1_1 888 908;ID=match$446_888_908;Name=Coil;status=T
g18106.t1_1	PANTHER	protein_match	39	1084	4.2E-207	+	.	date=18-12-2020;Target=g18106.t1_1 39 1084;ID=match$447_39_1084;Name=PTHR14826:SF14;status=T
g18106.t1_1	MobiDBLite	protein_match	1053	1101	.	+	.	date=18-12-2020;Target=g18106.t1_1 1053 1101;ID=match$448_1053_1101;signature_desc=consensus disorder prediction;Name=mobidb-lite;status=T
g18106.t1_1	PRINTS	protein_match	477	495	7.7E-9	+	.	date=18-12-2020;Target=g18106.t1_1 477 495;ID=match$449_477_495;signature_desc=Angiomotin family signature;Name=PR01807;status=T;Dbxref="InterPro:IPR009114"
g18106.t1_1	PRINTS	protein_match	500	515	7.7E-9	+	.	date=18-12-2020;Target=g18106.t1_1 500 515;ID=match$449_500_515;signature_desc=Angiomotin family signature;Name=PR01807;status=T;Dbxref="InterPro:IPR009114"
g18106.t1_1	PRINTS	protein_match	601	618	7.7E-9	+	.	date=18-12-2020;Target=g18106.t1_1 601 618;ID=match$449_601_618;signature_desc=Angiomotin family signature;Name=PR01807;status=T;Dbxref="InterPro:IPR009114"
g18106.t1_1	PRINTS	protein_match	585	599	7.7E-9	+	.	date=18-12-2020;Target=g18106.t1_1 585 599;ID=match$449_585_599;signature_desc=Angiomotin family signature;Name=PR01807;status=T;Dbxref="InterPro:IPR009114"
g18106.t1_1	Pfam	protein_match	588	735	7.9E-16	+	.	date=18-12-2020;Target=g18106.t1_1 588 735;ID=match$450_588_735;signature_desc=Angiomotin C terminal;Name=PF12240;status=T;Dbxref="InterPro:IPR024646"
g18106.t1_1	Coils	protein_match	585	622	.	+	.	date=18-12-2020;Target=g18106.t1_1 585 622;ID=match$451_585_622;Name=Coil;status=T
g18106.t1_1	MobiDBLite	protein_match	982	1032	.	+	.	date=18-12-2020;Target=g18106.t1_1 982 1032;ID=match$452_982_1032;signature_desc=consensus disorder prediction;Name=mobidb-lite;status=T
g18106.t1_1	MobiDBLite	protein_match	160	198	.	+	.	date=18-12-2020;Target=g18106.t1_1 160 198;ID=match$453_160_198;signature_desc=consensus disorder prediction;Name=mobidb-lite;status=T
g18106.t1_1	MobiDBLite	protein_match	275	303	.	+	.	date=18-12-2020;Target=g18106.t1_1 275 303;ID=match$454_275_303;signature_desc=consensus disorder prediction;Name=mobidb-lite;status=T
g18106.t1_1	MobiDBLite	protein_match	606	637	.	+	.	date=18-12-2020;Target=g18106.t1_1 606 637;ID=match$455_606_637;signature_desc=consensus disorder prediction;Name=mobidb-lite;status=T
g18106.t1_1	MobiDBLite	protein_match	336	417	.	+	.	date=18-12-2020;Target=g18106.t1_1 336 417;ID=match$456_336_417;signature_desc=consensus disorder prediction;Name=mobidb-lite;status=T
g18106.t1_1	MobiDBLite	protein_match	343	357	.	+	.	date=18-12-2020;Target=g18106.t1_1 343 357;ID=match$457_343_357;signature_desc=consensus disorder prediction;Name=mobidb-lite;status=T
g18106.t1_1	MobiDBLite	protein_match	358	374	.	+	.	date=18-12-2020;Target=g18106.t1_1 358 374;ID=match$458_358_374;signature_desc=consensus disorder prediction;Name=mobidb-lite;status=T
g18106.t1_1	MobiDBLite	protein_match	607	622	.	+	.	date=18-12-2020;Target=g18106.t1_1 607 622;ID=match$459_607_622;signature_desc=consensus disorder prediction;Name=mobidb-lite;status=T
g18106.t1_1	Coils	protein_match	675	730	.	+	.	date=18-12-2020;Target=g18106.t1_1 675 730;ID=match$460_675_730;Name=Coil;status=T
g18106.t1_1	MobiDBLite	protein_match	121	136	.	+	.	date=18-12-2020;Target=g18106.t1_1 121 136;ID=match$461_121_136;signature_desc=consensus disorder prediction;Name=mobidb-lite;status=T
g18106.t1_1	PANTHER	protein_match	39	1084	4.2E-207	+	.	date=18-12-2020;Target=g18106.t1_1 39 1084;ID=match$462_39_1084;Name=PTHR14826;status=T
g11285.t1_1	.	polypeptide	1	561	.	+	.	ID=g11285.t1_1;md5=1c1ccd09e4f5ae0ff79d7705f10e25d1
g11285.t1_1	PANTHER	protein_match	39	519	2.3E-233	+	.	date=18-12-2020;Target=g11285.t1_1 39 519;Ontology_term="GO:0016791";ID=match$463_39_519;Name=PTHR11596;status=T;Dbxref="InterPro:IPR001952"
g11285.t1_1	PRINTS	protein_match	130	145	1.3E-41	+	.	date=18-12-2020;Target=g11285.t1_1 130 145;Ontology_term="GO:0016791";ID=match$464_130_145;signature_desc=Alkaline phosphatase signature;Name=PR00113;status=T;Dbxref="InterPro:IPR001952"
g11285.t1_1	PRINTS	protein_match	179	199	1.3E-41	+	.	date=18-12-2020;Target=g11285.t1_1 179 199;Ontology_term="GO:0016791";ID=match$464_179_199;signature_desc=Alkaline phosphatase signature;Name=PR00113;status=T;Dbxref="InterPro:IPR001952"
g11285.t1_1	PRINTS	protein_match	80	100	1.3E-41	+	.	date=18-12-2020;Target=g11285.t1_1 80 100;Ontology_term="GO:0016791";ID=match$464_80_100;signature_desc=Alkaline phosphatase signature;Name=PR00113;status=T;Dbxref="InterPro:IPR001952"
g11285.t1_1	PRINTS	protein_match	236	246	1.3E-41	+	.	date=18-12-2020;Target=g11285.t1_1 236 246;Ontology_term="GO:0016791";ID=match$464_236_246;signature_desc=Alkaline phosphatase signature;Name=PR00113;status=T;Dbxref="InterPro:IPR001952"
g11285.t1_1	PRINTS	protein_match	326	355	1.3E-41	+	.	date=18-12-2020;Target=g11285.t1_1 326 355;Ontology_term="GO:0016791";ID=match$464_326_355;signature_desc=Alkaline phosphatase signature;Name=PR00113;status=T;Dbxref="InterPro:IPR001952"
g11285.t1_1	Gene3D	protein_match	52	522	1.2E-162	+	.	date=18-12-2020;Target=g11285.t1_1 52 522;Ontology_term="GO:0003824";ID=match$465_52_522;Name=G3DSA:3.40.720.10;status=T;Dbxref="InterPro:IPR017850"
g11285.t1_1	Pfam	protein_match	80	513	8.0E-120	+	.	date=18-12-2020;Target=g11285.t1_1 80 513;Ontology_term="GO:0016791";ID=match$466_80_513;signature_desc=Alkaline phosphatase;Name=PF00245;status=T;Dbxref="InterPro:IPR001952"
g11285.t1_1	PANTHER	protein_match	39	519	2.3E-233	+	.	date=18-12-2020;Target=g11285.t1_1 39 519;ID=match$467_39_519;Name=PTHR11596:SF75;status=T
g11285.t1_1	SMART	protein_match	81	514	4.7E-144	+	.	date=18-12-2020;Target=g11285.t1_1 81 514;Ontology_term="GO:0016791";ID=match$468_81_514;Name=SM00098;status=T;Dbxref="InterPro:IPR001952"
g11285.t1_1	Coils	protein_match	63	83	.	+	.	date=18-12-2020;Target=g11285.t1_1 63 83;ID=match$469_63_83;Name=Coil;status=T
g11285.t1_1	CDD	protein_match	81	512	2.77014E-106	+	.	date=18-12-2020;Target=g11285.t1_1 81 512;Ontology_term="GO:0016791";ID=match$470_81_512;signature_desc=ALP;Name=cd16012;status=T;Dbxref="InterPro:IPR001952"
g11285.t1_1	SUPERFAMILY	protein_match	52	517	2.8E-135	+	.	date=18-12-2020;Target=g11285.t1_1 52 517;Ontology_term="GO:0003824";ID=match$471_52_517;Name=SSF53649;status=T;Dbxref="InterPro:IPR017850"
g2234.t1_1	.	polypeptide	1	1430	.	+	.	ID=g2234.t1_1;md5=d01b38db0210b4c01ba35558a258606b
g2234.t1_1	Gene3D	protein_match	1253	1319	3.0E-5	+	.	date=18-12-2020;Target=g2234.t1_1 1253 1319;ID=match$472_1253_1319;Name=G3DSA:2.60.420.10;status=T
g2234.t1_1	PANTHER	protein_match	661	1310	0.0	+	.	date=18-12-2020;Target=g2234.t1_1 661 1310;ID=match$473_661_1310;Name=PTHR11051;status=T
g2234.t1_1	SUPERFAMILY	protein_match	862	1310	9.98E-78	+	.	date=18-12-2020;Target=g2234.t1_1 862 1310;Ontology_term="GO:0005975";ID=match$474_862_1310;Name=SSF48208;status=T;Dbxref="InterPro:IPR008928"
g2234.t1_1	PANTHER	protein_match	661	1310	0.0	+	.	date=18-12-2020;Target=g2234.t1_1 661 1310;ID=match$475_661_1310;Name=PTHR11051:SF8;status=T
g2234.t1_1	Pfam	protein_match	300	510	7.4E-46	+	.	date=18-12-2020;Target=g2234.t1_1 300 510;Ontology_term="GO:0003824","GO:0005975";ID=match$476_300_510;signature_desc=Glycosyl hydrolase family 65 central catalytic domain;Name=PF03632;status=T;Dbxref="InterPro:IPR005195"
g2234.t1_1	Pfam	protein_match	1152	1266	5.5E-7	+	.	date=18-12-2020;Target=g2234.t1_1 1152 1266;Ontology_term="GO:0003824","GO:0005975";ID=match$476_1152_1266;signature_desc=Glycosyl hydrolase family 65 central catalytic domain;Name=PF03632;status=T;Dbxref="InterPro:IPR005195"
g2234.t1_1	Pfam	protein_match	515	630	5.1E-9	+	.	date=18-12-2020;Target=g2234.t1_1 515 630;Ontology_term="GO:0003824","GO:0005975";ID=match$476_515_630;signature_desc=Glycosyl hydrolase family 65 central catalytic domain;Name=PF03632;status=T;Dbxref="InterPro:IPR005195"
g2234.t1_1	Pfam	protein_match	940	1147	5.2E-45	+	.	date=18-12-2020;Target=g2234.t1_1 940 1147;Ontology_term="GO:0003824","GO:0005975";ID=match$476_940_1147;signature_desc=Glycosyl hydrolase family 65 central catalytic domain;Name=PF03632;status=T;Dbxref="InterPro:IPR005195"
g2234.t1_1	SUPERFAMILY	protein_match	214	660	1.02E-81	+	.	date=18-12-2020;Target=g2234.t1_1 214 660;Ontology_term="GO:0005975";ID=match$477_214_660;Name=SSF48208;status=T;Dbxref="InterPro:IPR008928"
g2234.t1_1	Gene3D	protein_match	260	617	1.0E-76	+	.	date=18-12-2020;Target=g2234.t1_1 260 617;Ontology_term="GO:0005975";ID=match$478_260_617;Name=G3DSA:1.50.10.10;status=T;Dbxref="InterPro:IPR012341"
g2234.t1_1	Gene3D	protein_match	896	1252	1.0E-74	+	.	date=18-12-2020;Target=g2234.t1_1 896 1252;Ontology_term="GO:0005975";ID=match$478_896_1252;Name=G3DSA:1.50.10.10;status=T;Dbxref="InterPro:IPR012341"
g2234.t1_1	MobiDBLite	protein_match	1407	1430	.	+	.	date=18-12-2020;Target=g2234.t1_1 1407 1430;ID=match$479_1407_1430;signature_desc=consensus disorder prediction;Name=mobidb-lite;status=T
g2234.t1_1	PANTHER	protein_match	11	659	0.0	+	.	date=18-12-2020;Target=g2234.t1_1 11 659;ID=match$480_11_659;Name=PTHR11051:SF8;status=T
g2234.t1_1	PANTHER	protein_match	11	659	0.0	+	.	date=18-12-2020;Target=g2234.t1_1 11 659;ID=match$481_11_659;Name=PTHR11051;status=T
g3183.t1_1	.	polypeptide	1	110	.	+	.	ID=g3183.t1_1;md5=7bfbd551481616b9c608632a136b47f2
g3183.t1_1	Pfam	protein_match	16	89	7.1E-8	+	.	date=18-12-2020;Target=g3183.t1_1 16 89;Ontology_term="GO:0003824","GO:0005975","GO:0043169";ID=match$482_16_89;signature_desc=Alpha amylase, C-terminal all-beta domain;Name=PF02806;status=T;Dbxref="InterPro:IPR006048"
g3183.t1_1	Gene3D	protein_match	12	110	8.8E-25	+	.	date=18-12-2020;Target=g3183.t1_1 12 110;ID=match$483_12_110;Name=G3DSA:2.60.40.1180;status=T;Dbxref="InterPro:IPR013780"
g3183.t1_1	PANTHER	protein_match	1	106	1.1E-14	+	.	date=18-12-2020;Target=g3183.t1_1 1 106;ID=match$484_1_106;Name=PTHR43447:SF27;status=T
g3183.t1_1	SUPERFAMILY	protein_match	12	102	1.2E-21	+	.	date=18-12-2020;Target=g3183.t1_1 12 102;ID=match$485_12_102;Name=SSF51011;status=T
g3183.t1_1	SMART	protein_match	14	107	1.3E-18	+	.	date=18-12-2020;Target=g3183.t1_1 14 107;ID=match$486_14_107;Name=SM00632;status=T;Dbxref="InterPro:IPR031319"
g3183.t1_1	PANTHER	protein_match	1	106	1.1E-14	+	.	date=18-12-2020;Target=g3183.t1_1 1 106;ID=match$487_1_106;Name=PTHR43447;status=T
g15379.t1_1	.	polypeptide	1	222	.	+	.	ID=g15379.t1_1;md5=9747174e5718d7c05ac4fc3818c9ccf5
g15379.t1_1	SUPERFAMILY	protein_match	11	188	1.31E-55	+	.	date=18-12-2020;Target=g15379.t1_1 11 188;Ontology_term="GO:0004842";ID=match$488_11_188;Name=SSF56204;status=T;Dbxref="InterPro:IPR035983"
g15379.t1_1	PANTHER	protein_match	1	215	2.4E-135	+	.	date=18-12-2020;Target=g15379.t1_1 1 215;ID=match$489_1_215;Name=PTHR22870:SF398;status=T
g15379.t1_1	SMART	protein_match	1	199	2.2E-7	+	.	date=18-12-2020;Target=g15379.t1_1 1 199;Ontology_term="GO:0004842";ID=match$490_1_199;Name=SM00119;status=T;Dbxref="InterPro:IPR000569"
g15379.t1_1	Pfam	protein_match	12	188	1.4E-42	+	.	date=18-12-2020;Target=g15379.t1_1 12 188;Ontology_term="GO:0004842";ID=match$491_12_188;signature_desc=HECT-domain (ubiquitin-transferase);Name=PF00632;status=T;Dbxref="InterPro:IPR000569"
g15379.t1_1	Gene3D	protein_match	10	41	7.3E-15	+	.	date=18-12-2020;Target=g15379.t1_1 10 41;ID=match$492_10_41;Name=G3DSA:3.30.2160.10;status=T
g15379.t1_1	Gene3D	protein_match	42	76	7.3E-15	+	.	date=18-12-2020;Target=g15379.t1_1 42 76;ID=match$493_42_76;Name=G3DSA:3.90.1750.10;status=T
g15379.t1_1	ProSiteProfiles	protein_match	22	185	35.099	+	.	date=18-12-2020;Target=g15379.t1_1 22 185;Ontology_term="GO:0004842";ID=match$494_22_185;signature_desc=HECT domain profile.;Name=PS50237;status=T;Dbxref="InterPro:IPR000569"
g15379.t1_1	PANTHER	protein_match	1	215	2.4E-135	+	.	date=18-12-2020;Target=g15379.t1_1 1 215;ID=match$495_1_215;Name=PTHR22870;status=T
g15379.t1_1	Gene3D	protein_match	78	191	3.7E-29	+	.	date=18-12-2020;Target=g15379.t1_1 78 191;ID=match$496_78_191;Name=G3DSA:3.30.2410.10;status=T
g17472.t1_1	.	polypeptide	1	327	.	+	.	ID=g17472.t1_1;md5=a5543d6cb73be66197e7422f77072ca0
g17472.t1_1	MobiDBLite	protein_match	1	29	.	+	.	date=18-12-2020;Target=g17472.t1_1 1 29;ID=match$497_1_29;signature_desc=consensus disorder prediction;Name=mobidb-lite;status=T
g17472.t1_1	PANTHER	protein_match	7	323	1.3E-109	+	.	date=18-12-2020;Target=g17472.t1_1 7 323;ID=match$498_7_323;Name=PTHR10174;status=T
g17472.t1_1	MobiDBLite	protein_match	1	17	.	+	.	date=18-12-2020;Target=g17472.t1_1 1 17;ID=match$499_1_17;signature_desc=consensus disorder prediction;Name=mobidb-lite;status=T
g17472.t1_1	SUPERFAMILY	protein_match	128	295	1.1E-35	+	.	date=18-12-2020;Target=g17472.t1_1 128 295;ID=match$500_128_295;Name=SSF52087;status=T;Dbxref="InterPro:IPR036865"
g17472.t1_1	SMART	protein_match	72	97	5.3E-4	+	.	date=18-12-2020;Target=g17472.t1_1 72 97;ID=match$501_72_97;Name=SM01100;status=T;Dbxref="InterPro:IPR011074"
g17472.t1_1	Gene3D	protein_match	104	282	8.5E-36	+	.	date=18-12-2020;Target=g17472.t1_1 104 282;ID=match$502_104_282;Name=G3DSA:3.40.525.10;status=T;Dbxref="InterPro:IPR036865"
g17472.t1_1	Pfam	protein_match	129	273	1.1E-25	+	.	date=18-12-2020;Target=g17472.t1_1 129 273;ID=match$503_129_273;signature_desc=CRAL/TRIO domain;Name=PF00650;status=T;Dbxref="InterPro:IPR001251"
g17472.t1_1	SUPERFAMILY	protein_match	36	113	8.63E-21	+	.	date=18-12-2020;Target=g17472.t1_1 36 113;ID=match$504_36_113;Name=SSF46938;status=T;Dbxref="InterPro:IPR036273"
g17472.t1_1	ProSiteProfiles	protein_match	118	278	14.03	+	.	date=18-12-2020;Target=g17472.t1_1 118 278;ID=match$505_118_278;signature_desc=CRAL-TRIO lipid binding domain profile.;Name=PS50191;status=T;Dbxref="InterPro:IPR001251"
g17472.t1_1	PRINTS	protein_match	264	273	1.4E-14	+	.	date=18-12-2020;Target=g17472.t1_1 264 273;ID=match$506_264_273;signature_desc=Cellular retinaldehyde-binding protein signature;Name=PR00180;status=T
g17472.t1_1	PRINTS	protein_match	233	252	1.4E-14	+	.	date=18-12-2020;Target=g17472.t1_1 233 252;ID=match$506_233_252;signature_desc=Cellular retinaldehyde-binding protein signature;Name=PR00180;status=T
g17472.t1_1	PRINTS	protein_match	200	221	1.4E-14	+	.	date=18-12-2020;Target=g17472.t1_1 200 221;ID=match$506_200_221;signature_desc=Cellular retinaldehyde-binding protein signature;Name=PR00180;status=T
g17472.t1_1	PRINTS	protein_match	75	97	1.4E-14	+	.	date=18-12-2020;Target=g17472.t1_1 75 97;ID=match$506_75_97;signature_desc=Cellular retinaldehyde-binding protein signature;Name=PR00180;status=T
g17472.t1_1	PANTHER	protein_match	7	323	1.3E-109	+	.	date=18-12-2020;Target=g17472.t1_1 7 323;ID=match$507_7_323;Name=PTHR10174:SF166;status=T
g17472.t1_1	SMART	protein_match	120	275	4.1E-7	+	.	date=18-12-2020;Target=g17472.t1_1 120 275;ID=match$508_120_275;Name=SM00516;status=T;Dbxref="InterPro:IPR001251"
g17472.t1_1	CDD	protein_match	119	273	1.83486E-19	+	.	date=18-12-2020;Target=g17472.t1_1 119 273;ID=match$509_119_273;signature_desc=SEC14;Name=cd00170;status=T;Dbxref="InterPro:IPR001251"
g17472.t1_1	Gene3D	protein_match	23	103	1.2E-16	+	.	date=18-12-2020;Target=g17472.t1_1 23 103;ID=match$510_23_103;Name=G3DSA:1.10.8.20;status=T
g15271.t1_1	.	polypeptide	1	126	.	+	.	ID=g15271.t1_1;md5=ae60338170ad41aeba2f63c1119e4609
g15271.t1_1	Gene3D	protein_match	69	126	7.1E-24	+	.	date=18-12-2020;Target=g15271.t1_1 69 126;ID=match$511_69_126;Name=G3DSA:3.30.930.10;status=T
g15271.t1_1	PANTHER	protein_match	54	126	5.5E-23	+	.	date=18-12-2020;Target=g15271.t1_1 54 126;Ontology_term="GO:0009249";ID=match$512_54_126;Name=PTHR12561;status=T;Dbxref="InterPro:IPR004562"
g15271.t1_1	MobiDBLite	protein_match	18	44	.	+	.	date=18-12-2020;Target=g15271.t1_1 18 44;ID=match$513_18_44;signature_desc=consensus disorder prediction;Name=mobidb-lite;status=T
g15271.t1_1	SUPERFAMILY	protein_match	64	126	2.49E-15	+	.	date=18-12-2020;Target=g15271.t1_1 64 126;ID=match$514_64_126;Name=SSF55681;status=T
g15769.t1_1	.	polypeptide	1	211	.	+	.	ID=g15769.t1_1;md5=53173f3b8c1307731a62f7622c43042a
g15769.t1_1	Pfam	protein_match	10	153	7.6E-41	+	.	date=18-12-2020;Target=g15769.t1_1 10 153;Ontology_term="GO:0005525";ID=match$515_10_153;signature_desc=ADP-ribosylation factor family;Name=PF00025;status=T;Dbxref="InterPro:IPR006689"
g15769.t1_1	SMART	protein_match	1	193	4.9E-27	+	.	date=18-12-2020;Target=g15769.t1_1 1 193;ID=match$516_1_193;Name=SM00177;status=T
g15769.t1_1	SMART	protein_match	5	204	2.2E-12	+	.	date=18-12-2020;Target=g15769.t1_1 5 204;ID=match$517_5_204;Name=SM00178;status=T
g15769.t1_1	PANTHER	protein_match	1	164	5.5E-65	+	.	date=18-12-2020;Target=g15769.t1_1 1 164;ID=match$518_1_164;Name=PTHR45909;status=T
g15769.t1_1	TIGRFAM	protein_match	17	140	5.6E-18	+	.	date=18-12-2020;Target=g15769.t1_1 17 140;Ontology_term="GO:0005525";ID=match$519_17_140;signature_desc=small_GTP: small GTP-binding protein domain;Name=TIGR00231;status=T;Dbxref="InterPro:IPR005225"
g15769.t1_1	PANTHER	protein_match	1	164	5.5E-65	+	.	date=18-12-2020;Target=g15769.t1_1 1 164;ID=match$520_1_164;Name=PTHR45909:SF1;status=T
g15769.t1_1	Gene3D	protein_match	19	169	1.2E-45	+	.	date=18-12-2020;Target=g15769.t1_1 19 169;ID=match$521_19_169;Name=G3DSA:3.40.50.300;status=T
g15769.t1_1	ProSiteProfiles	protein_match	11	208	18.117	+	.	date=18-12-2020;Target=g15769.t1_1 11 208;ID=match$522_11_208;signature_desc=small GTPase Arf family profile.;Name=PS51417;status=T
g15769.t1_1	PRINTS	protein_match	18	39	1.7E-6	+	.	date=18-12-2020;Target=g15769.t1_1 18 39;ID=match$523_18_39;signature_desc=Transforming protein P21 ras signature;Name=PR00449;status=T
g15769.t1_1	PRINTS	protein_match	62	84	1.7E-6	+	.	date=18-12-2020;Target=g15769.t1_1 62 84;ID=match$523_62_84;signature_desc=Transforming protein P21 ras signature;Name=PR00449;status=T
g15769.t1_1	PRINTS	protein_match	125	138	1.7E-6	+	.	date=18-12-2020;Target=g15769.t1_1 125 138;ID=match$523_125_138;signature_desc=Transforming protein P21 ras signature;Name=PR00449;status=T
g15769.t1_1	SUPERFAMILY	protein_match	14	160	1.25E-38	+	.	date=18-12-2020;Target=g15769.t1_1 14 160;ID=match$524_14_160;Name=SSF52540;status=T;Dbxref="InterPro:IPR027417"
g15769.t1_1	CDD	protein_match	19	164	3.63994E-94	+	.	date=18-12-2020;Target=g15769.t1_1 19 164;ID=match$525_19_164;signature_desc=Arfrp1;Name=cd04160;status=T
g7431.t1_1	.	polypeptide	1	267	.	+	.	ID=g7431.t1_1;md5=da8da4f5fc7756ef1b9b3c9faeb51049
g7431.t1_1	MobiDBLite	protein_match	27	47	.	+	.	date=18-12-2020;Target=g7431.t1_1 27 47;ID=match$526_27_47;signature_desc=consensus disorder prediction;Name=mobidb-lite;status=T
g7431.t1_1	MobiDBLite	protein_match	1	48	.	+	.	date=18-12-2020;Target=g7431.t1_1 1 48;ID=match$527_1_48;signature_desc=consensus disorder prediction;Name=mobidb-lite;status=T
g7431.t1_1	Pfam	protein_match	69	251	2.9E-35	+	.	date=18-12-2020;Target=g7431.t1_1 69 251;Ontology_term="GO:0005375","GO:0016021","GO:0035434";ID=match$528_69_251;signature_desc=Ctr copper transporter family;Name=PF04145;status=T;Dbxref="InterPro:IPR007274"
g7431.t1_1	PANTHER	protein_match	29	266	6.4E-42	+	.	date=18-12-2020;Target=g7431.t1_1 29 266;Ontology_term="GO:0005375","GO:0016021","GO:0035434";ID=match$529_29_266;Name=PTHR12483;status=T;Dbxref="InterPro:IPR007274"
g7431.t1_1	PANTHER	protein_match	29	266	6.4E-42	+	.	date=18-12-2020;Target=g7431.t1_1 29 266;ID=match$530_29_266;Name=PTHR12483:SF27;status=T
g1708.t1_1	.	polypeptide	1	114	.	+	.	ID=g1708.t1_1;md5=69a7e37247e8ccaac06eab38d5f21df7
g1708.t1_1	MobiDBLite	protein_match	19	38	.	+	.	date=18-12-2020;Target=g1708.t1_1 19 38;ID=match$531_19_38;signature_desc=consensus disorder prediction;Name=mobidb-lite;status=T
g1708.t1_1	MobiDBLite	protein_match	1	18	.	+	.	date=18-12-2020;Target=g1708.t1_1 1 18;ID=match$532_1_18;signature_desc=consensus disorder prediction;Name=mobidb-lite;status=T
g1708.t1_1	MobiDBLite	protein_match	1	66	.	+	.	date=18-12-2020;Target=g1708.t1_1 1 66;ID=match$533_1_66;signature_desc=consensus disorder prediction;Name=mobidb-lite;status=T
g15939.t1_1	.	polypeptide	1	1180	.	+	.	ID=g15939.t1_1;md5=b161a8ed426966cb1e59f1d8c97c31e9
g15939.t1_1	MobiDBLite	protein_match	920	1015	.	+	.	date=18-12-2020;Target=g15939.t1_1 920 1015;ID=match$534_920_1015;signature_desc=consensus disorder prediction;Name=mobidb-lite;status=T
g15939.t1_1	MobiDBLite	protein_match	961	975	.	+	.	date=18-12-2020;Target=g15939.t1_1 961 975;ID=match$535_961_975;signature_desc=consensus disorder prediction;Name=mobidb-lite;status=T
g15939.t1_1	MobiDBLite	protein_match	258	440	.	+	.	date=18-12-2020;Target=g15939.t1_1 258 440;ID=match$536_258_440;signature_desc=consensus disorder prediction;Name=mobidb-lite;status=T
g15939.t1_1	MobiDBLite	protein_match	1050	1070	.	+	.	date=18-12-2020;Target=g15939.t1_1 1050 1070;ID=match$537_1050_1070;signature_desc=consensus disorder prediction;Name=mobidb-lite;status=T
g15939.t1_1	MobiDBLite	protein_match	327	348	.	+	.	date=18-12-2020;Target=g15939.t1_1 327 348;ID=match$538_327_348;signature_desc=consensus disorder prediction;Name=mobidb-lite;status=T
g15939.t1_1	MobiDBLite	protein_match	925	959	.	+	.	date=18-12-2020;Target=g15939.t1_1 925 959;ID=match$539_925_959;signature_desc=consensus disorder prediction;Name=mobidb-lite;status=T
g15939.t1_1	MobiDBLite	protein_match	407	438	.	+	.	date=18-12-2020;Target=g15939.t1_1 407 438;ID=match$540_407_438;signature_desc=consensus disorder prediction;Name=mobidb-lite;status=T
g15939.t1_1	MobiDBLite	protein_match	725	741	.	+	.	date=18-12-2020;Target=g15939.t1_1 725 741;ID=match$541_725_741;signature_desc=consensus disorder prediction;Name=mobidb-lite;status=T
g15939.t1_1	MobiDBLite	protein_match	106	155	.	+	.	date=18-12-2020;Target=g15939.t1_1 106 155;ID=match$542_106_155;signature_desc=consensus disorder prediction;Name=mobidb-lite;status=T
g15939.t1_1	MobiDBLite	protein_match	113	134	.	+	.	date=18-12-2020;Target=g15939.t1_1 113 134;ID=match$543_113_134;signature_desc=consensus disorder prediction;Name=mobidb-lite;status=T
g15939.t1_1	MobiDBLite	protein_match	703	750	.	+	.	date=18-12-2020;Target=g15939.t1_1 703 750;ID=match$544_703_750;signature_desc=consensus disorder prediction;Name=mobidb-lite;status=T
g15939.t1_1	MobiDBLite	protein_match	977	993	.	+	.	date=18-12-2020;Target=g15939.t1_1 977 993;ID=match$545_977_993;signature_desc=consensus disorder prediction;Name=mobidb-lite;status=T
g15939.t1_1	MobiDBLite	protein_match	349	375	.	+	.	date=18-12-2020;Target=g15939.t1_1 349 375;ID=match$546_349_375;signature_desc=consensus disorder prediction;Name=mobidb-lite;status=T
g14017.t1_1	.	polypeptide	1	545	.	+	.	ID=g14017.t1_1;md5=5105b13656bea41733777a741af53035
g14017.t1_1	SUPERFAMILY	protein_match	43	536	3.23E-25	+	.	date=18-12-2020;Target=g14017.t1_1 43 536;ID=match$547_43_536;Name=SSF103473;status=T;Dbxref="InterPro:IPR036259"
g14017.t1_1	Pfam	protein_match	66	442	9.5E-11	+	.	date=18-12-2020;Target=g14017.t1_1 66 442;Ontology_term="GO:0022857","GO:0055085";ID=match$548_66_442;signature_desc=Major Facilitator Superfamily;Name=PF07690;status=T;Dbxref="InterPro:IPR011701"
g14017.t1_1	Coils	protein_match	264	284	.	+	.	date=18-12-2020;Target=g14017.t1_1 264 284;ID=match$549_264_284;Name=Coil;status=T
g14017.t1_1	PANTHER	protein_match	43	535	1.3E-96	+	.	date=18-12-2020;Target=g14017.t1_1 43 535;ID=match$550_43_535;Name=PTHR19432;status=T
g12319.t1_1	.	polypeptide	1	652	.	+	.	ID=g12319.t1_1;md5=a1ca3364740159e2aa56c77e1fce2953
g12319.t1_1	Pfam	protein_match	522	604	1.0E-7	+	.	date=18-12-2020;Target=g12319.t1_1 522 604;ID=match$551_522_604;signature_desc=Zinc finger protein;Name=PF12417;status=T;Dbxref="InterPro:IPR022137"
g12319.t1_1	MobiDBLite	protein_match	265	279	.	+	.	date=18-12-2020;Target=g12319.t1_1 265 279;ID=match$552_265_279;signature_desc=consensus disorder prediction;Name=mobidb-lite;status=T
g12319.t1_1	MobiDBLite	protein_match	32	101	.	+	.	date=18-12-2020;Target=g12319.t1_1 32 101;ID=match$553_32_101;signature_desc=consensus disorder prediction;Name=mobidb-lite;status=T
g12319.t1_1	MobiDBLite	protein_match	342	367	.	+	.	date=18-12-2020;Target=g12319.t1_1 342 367;ID=match$554_342_367;signature_desc=consensus disorder prediction;Name=mobidb-lite;status=T
g12319.t1_1	MobiDBLite	protein_match	288	302	.	+	.	date=18-12-2020;Target=g12319.t1_1 288 302;ID=match$555_288_302;signature_desc=consensus disorder prediction;Name=mobidb-lite;status=T
g12319.t1_1	MobiDBLite	protein_match	162	176	.	+	.	date=18-12-2020;Target=g12319.t1_1 162 176;ID=match$556_162_176;signature_desc=consensus disorder prediction;Name=mobidb-lite;status=T
g12319.t1_1	MobiDBLite	protein_match	484	508	.	+	.	date=18-12-2020;Target=g12319.t1_1 484 508;ID=match$557_484_508;signature_desc=consensus disorder prediction;Name=mobidb-lite;status=T
g12319.t1_1	MobiDBLite	protein_match	232	264	.	+	.	date=18-12-2020;Target=g12319.t1_1 232 264;ID=match$558_232_264;signature_desc=consensus disorder prediction;Name=mobidb-lite;status=T
g12319.t1_1	Pfam	protein_match	55	108	1.1E-17	+	.	date=18-12-2020;Target=g12319.t1_1 55 108;ID=match$559_55_108;signature_desc=NF-kappa-B-activating protein;Name=PF15692;status=T
g12319.t1_1	MobiDBLite	protein_match	382	396	.	+	.	date=18-12-2020;Target=g12319.t1_1 382 396;ID=match$560_382_396;signature_desc=consensus disorder prediction;Name=mobidb-lite;status=T
g12319.t1_1	MobiDBLite	protein_match	419	449	.	+	.	date=18-12-2020;Target=g12319.t1_1 419 449;ID=match$561_419_449;signature_desc=consensus disorder prediction;Name=mobidb-lite;status=T
g12319.t1_1	MobiDBLite	protein_match	467	482	.	+	.	date=18-12-2020;Target=g12319.t1_1 467 482;ID=match$562_467_482;signature_desc=consensus disorder prediction;Name=mobidb-lite;status=T
g12319.t1_1	MobiDBLite	protein_match	1	508	.	+	.	date=18-12-2020;Target=g12319.t1_1 1 508;ID=match$563_1_508;signature_desc=consensus disorder prediction;Name=mobidb-lite;status=T
g12319.t1_1	MobiDBLite	protein_match	138	154	.	+	.	date=18-12-2020;Target=g12319.t1_1 138 154;ID=match$564_138_154;signature_desc=consensus disorder prediction;Name=mobidb-lite;status=T
g1430.t1_1	.	polypeptide	1	247	.	+	.	ID=g1430.t1_1;md5=18fbc2199fb9d2c2becd079bd806428e
g1430.t1_1	MobiDBLite	protein_match	34	49	.	+	.	date=18-12-2020;Target=g1430.t1_1 34 49;ID=match$565_34_49;signature_desc=consensus disorder prediction;Name=mobidb-lite;status=T
g1430.t1_1	MobiDBLite	protein_match	139	153	.	+	.	date=18-12-2020;Target=g1430.t1_1 139 153;ID=match$566_139_153;signature_desc=consensus disorder prediction;Name=mobidb-lite;status=T
g1430.t1_1	MobiDBLite	protein_match	1	224	.	+	.	date=18-12-2020;Target=g1430.t1_1 1 224;ID=match$567_1_224;signature_desc=consensus disorder prediction;Name=mobidb-lite;status=T
g1430.t1_1	MobiDBLite	protein_match	100	123	.	+	.	date=18-12-2020;Target=g1430.t1_1 100 123;ID=match$568_100_123;signature_desc=consensus disorder prediction;Name=mobidb-lite;status=T
g1430.t1_1	MobiDBLite	protein_match	59	82	.	+	.	date=18-12-2020;Target=g1430.t1_1 59 82;ID=match$569_59_82;signature_desc=consensus disorder prediction;Name=mobidb-lite;status=T
g1430.t1_1	MobiDBLite	protein_match	161	193	.	+	.	date=18-12-2020;Target=g1430.t1_1 161 193;ID=match$570_161_193;signature_desc=consensus disorder prediction;Name=mobidb-lite;status=T
g9171.t1_1	.	polypeptide	1	175	.	+	.	ID=g9171.t1_1;md5=eec18c4522eb184272af112caf26e501
g9171.t1_1	MobiDBLite	protein_match	37	57	.	+	.	date=18-12-2020;Target=g9171.t1_1 37 57;ID=match$571_37_57;signature_desc=consensus disorder prediction;Name=mobidb-lite;status=T
g9171.t1_1	Hamap	protein_match	70	168	24.813656	+	.	date=18-12-2020;Target=g9171.t1_1 70 168;Ontology_term="GO:0003735","GO:0005840","GO:0006412";ID=match$572_70_168;signature_desc=50S ribosomal protein L35Ae [rpl35ae].;Name=MF_00573;status=T;Dbxref="InterPro:IPR001780"
g9171.t1_1	Pfam	protein_match	68	168	3.2E-40	+	.	date=18-12-2020;Target=g9171.t1_1 68 168;Ontology_term="GO:0003735","GO:0005840","GO:0006412";ID=match$573_68_168;signature_desc=Ribosomal protein L35Ae;Name=PF01247;status=T;Dbxref="InterPro:IPR001780"
g9171.t1_1	Gene3D	protein_match	65	174	2.9E-49	+	.	date=18-12-2020;Target=g9171.t1_1 65 174;ID=match$574_65_174;Name=G3DSA:2.40.10.190;status=T;Dbxref="InterPro:IPR038661"
g9171.t1_1	MobiDBLite	protein_match	1	62	.	+	.	date=18-12-2020;Target=g9171.t1_1 1 62;ID=match$575_1_62;signature_desc=consensus disorder prediction;Name=mobidb-lite;status=T
g9171.t1_1	PANTHER	protein_match	53	174	1.5E-42	+	.	date=18-12-2020;Target=g9171.t1_1 53 174;Ontology_term="GO:0003735","GO:0005840","GO:0006412";ID=match$576_53_174;Name=PTHR10902;status=T;Dbxref="InterPro:IPR001780"
g9171.t1_1	ProSitePatterns	protein_match	136	157	.	+	.	date=18-12-2020;Target=g9171.t1_1 136 157;Ontology_term="GO:0003735","GO:0005840","GO:0006412";ID=match$577_136_157;signature_desc=Ribosomal protein L35Ae signature.;Name=PS01105;status=T;Dbxref="InterPro:IPR018266"
g9171.t1_1	SUPERFAMILY	protein_match	68	168	4.5E-33	+	.	date=18-12-2020;Target=g9171.t1_1 68 168;ID=match$578_68_168;Name=SSF50447;status=T;Dbxref="InterPro:IPR009000"
g11743.t1_1	.	polypeptide	1	278	.	+	.	ID=g11743.t1_1;md5=814ffdcde7aa19e0224c8857cd6d12ec
g11743.t1_1	PANTHER	protein_match	2	132	6.6E-45	+	.	date=18-12-2020;Target=g11743.t1_1 2 132;Ontology_term="GO:0055114";ID=match$579_2_132;Name=PTHR16557;status=T;Dbxref="InterPro:IPR004574"
g11743.t1_1	Pfam	protein_match	2	130	3.6E-33	+	.	date=18-12-2020;Target=g11743.t1_1 2 130;ID=match$580_2_130;signature_desc=2OG-Fe(II) oxygenase superfamily;Name=PF13532;status=T;Dbxref="InterPro:IPR027450"
g11743.t1_1	Gene3D	protein_match	1	146	5.8E-42	+	.	date=18-12-2020;Target=g11743.t1_1 1 146;ID=match$581_1_146;Name=G3DSA:2.60.120.590;status=T;Dbxref="InterPro:IPR037151"
g11743.t1_1	ProSiteProfiles	protein_match	47	151	8.097	+	.	date=18-12-2020;Target=g11743.t1_1 47 151;Ontology_term="GO:0016491","GO:0055114";ID=match$582_47_151;signature_desc=Fe(2+) 2-oxoglutarate dioxygenase domain profile.;Name=PS51471;status=T;Dbxref="InterPro:IPR005123"
g11743.t1_1	PANTHER	protein_match	2	132	6.6E-45	+	.	date=18-12-2020;Target=g11743.t1_1 2 132;ID=match$583_2_132;Name=PTHR16557:SF8;status=T
g11743.t1_1	SUPERFAMILY	protein_match	2	130	2.2E-33	+	.	date=18-12-2020;Target=g11743.t1_1 2 130;ID=match$584_2_130;Name=SSF51197;status=T
g2479.t1_1	.	polypeptide	1	275	.	+	.	ID=g2479.t1_1;md5=1d362e8bba37559858de0e9aabf875dc
g2479.t1_1	MobiDBLite	protein_match	36	58	.	+	.	date=18-12-2020;Target=g2479.t1_1 36 58;ID=match$585_36_58;signature_desc=consensus disorder prediction;Name=mobidb-lite;status=T
g2479.t1_1	SUPERFAMILY	protein_match	207	273	1.1E-12	+	.	date=18-12-2020;Target=g2479.t1_1 207 273;ID=match$586_207_273;Name=SSF81321;status=T
g2479.t1_1	Gene3D	protein_match	193	275	1.4E-15	+	.	date=18-12-2020;Target=g2479.t1_1 193 275;ID=match$587_193_275;Name=G3DSA:1.20.1070.10;status=T
g2479.t1_1	PANTHER	protein_match	63	161	1.0E-58	+	.	date=18-12-2020;Target=g2479.t1_1 63 161;ID=match$588_63_161;Name=PTHR24247:SF238;status=T
g2479.t1_1	PANTHER	protein_match	199	273	1.0E-58	+	.	date=18-12-2020;Target=g2479.t1_1 199 273;ID=match$589_199_273;Name=PTHR24247:SF238;status=T
g2479.t1_1	PANTHER	protein_match	199	273	1.0E-58	+	.	date=18-12-2020;Target=g2479.t1_1 199 273;ID=match$590_199_273;Name=PTHR24247;status=T
g2479.t1_1	SUPERFAMILY	protein_match	71	165	1.37E-19	+	.	date=18-12-2020;Target=g2479.t1_1 71 165;ID=match$591_71_165;Name=SSF81321;status=T
g2479.t1_1	PRINTS	protein_match	77	101	1.0E-10	+	.	date=18-12-2020;Target=g2479.t1_1 77 101;Ontology_term="GO:0004930","GO:0007186","GO:0016021";ID=match$592_77_101;signature_desc=Rhodopsin-like GPCR superfamily signature;Name=PR00237;status=T;Dbxref="InterPro:IPR000276"
g2479.t1_1	PRINTS	protein_match	110	131	1.0E-10	+	.	date=18-12-2020;Target=g2479.t1_1 110 131;Ontology_term="GO:0004930","GO:0007186","GO:0016021";ID=match$592_110_131;signature_desc=Rhodopsin-like GPCR superfamily signature;Name=PR00237;status=T;Dbxref="InterPro:IPR000276"
g2479.t1_1	PANTHER	protein_match	63	161	1.0E-58	+	.	date=18-12-2020;Target=g2479.t1_1 63 161;ID=match$593_63_161;Name=PTHR24247;status=T
g2479.t1_1	ProSiteProfiles	protein_match	228	275	11.244	+	.	date=18-12-2020;Target=g2479.t1_1 228 275;Ontology_term="GO:0016021";ID=match$594_228_275;signature_desc=G-protein coupled receptors family 1 profile.;Name=PS50262;status=T;Dbxref="InterPro:IPR017452"
g2479.t1_1	Pfam	protein_match	92	163	1.3E-18	+	.	date=18-12-2020;Target=g2479.t1_1 92 163;Ontology_term="GO:0004930","GO:0007186","GO:0016021";ID=match$595_92_163;signature_desc=7 transmembrane receptor (rhodopsin family);Name=PF00001;status=T;Dbxref="InterPro:IPR000276"
g2479.t1_1	ProSiteProfiles	protein_match	92	148	12.668	+	.	date=18-12-2020;Target=g2479.t1_1 92 148;Ontology_term="GO:0016021";ID=match$596_92_148;signature_desc=G-protein coupled receptors family 1 profile.;Name=PS50262;status=T;Dbxref="InterPro:IPR017452"
g2479.t1_1	Gene3D	protein_match	82	162	2.2E-24	+	.	date=18-12-2020;Target=g2479.t1_1 82 162;ID=match$597_82_162;Name=G3DSA:1.20.1070.10;status=T
g2479.t1_1	Pfam	protein_match	228	273	1.6E-9	+	.	date=18-12-2020;Target=g2479.t1_1 228 273;Ontology_term="GO:0004930","GO:0007186","GO:0016021";ID=match$598_228_273;signature_desc=7 transmembrane receptor (rhodopsin family);Name=PF00001;status=T;Dbxref="InterPro:IPR000276"
g12701.t1_1	.	polypeptide	1	284	.	+	.	ID=g12701.t1_1;md5=e93698447f68b2338ca2e0d5ac74b36d
g12701.t1_1	MobiDBLite	protein_match	203	234	.	+	.	date=18-12-2020;Target=g12701.t1_1 203 234;ID=match$599_203_234;signature_desc=consensus disorder prediction;Name=mobidb-lite;status=T
g12701.t1_1	MobiDBLite	protein_match	98	114	.	+	.	date=18-12-2020;Target=g12701.t1_1 98 114;ID=match$600_98_114;signature_desc=consensus disorder prediction;Name=mobidb-lite;status=T
g12701.t1_1	MobiDBLite	protein_match	203	231	.	+	.	date=18-12-2020;Target=g12701.t1_1 203 231;ID=match$601_203_231;signature_desc=consensus disorder prediction;Name=mobidb-lite;status=T
g12701.t1_1	MobiDBLite	protein_match	98	123	.	+	.	date=18-12-2020;Target=g12701.t1_1 98 123;ID=match$602_98_123;signature_desc=consensus disorder prediction;Name=mobidb-lite;status=T
g7738.t1_1	.	polypeptide	1	91	.	+	.	ID=g7738.t1_1;md5=4232d47f7aab407957f8e7f6a0437d57
g7738.t1_1	MobiDBLite	protein_match	1	16	.	+	.	date=18-12-2020;Target=g7738.t1_1 1 16;ID=match$603_1_16;signature_desc=consensus disorder prediction;Name=mobidb-lite;status=T
g7738.t1_1	MobiDBLite	protein_match	31	48	.	+	.	date=18-12-2020;Target=g7738.t1_1 31 48;ID=match$604_31_48;signature_desc=consensus disorder prediction;Name=mobidb-lite;status=T
g7738.t1_1	MobiDBLite	protein_match	1	91	.	+	.	date=18-12-2020;Target=g7738.t1_1 1 91;ID=match$605_1_91;signature_desc=consensus disorder prediction;Name=mobidb-lite;status=T
g7738.t1_1	MobiDBLite	protein_match	49	72	.	+	.	date=18-12-2020;Target=g7738.t1_1 49 72;ID=match$606_49_72;signature_desc=consensus disorder prediction;Name=mobidb-lite;status=T
g3537.t1_1	.	polypeptide	1	235	.	+	.	ID=g3537.t1_1;md5=9e119c6ce51cb76ff2718988d920ff41
g3537.t1_1	MobiDBLite	protein_match	1	148	.	+	.	date=18-12-2020;Target=g3537.t1_1 1 148;ID=match$607_1_148;signature_desc=consensus disorder prediction;Name=mobidb-lite;status=T
g3537.t1_1	MobiDBLite	protein_match	169	235	.	+	.	date=18-12-2020;Target=g3537.t1_1 169 235;ID=match$608_169_235;signature_desc=consensus disorder prediction;Name=mobidb-lite;status=T
g3537.t1_1	MobiDBLite	protein_match	172	191	.	+	.	date=18-12-2020;Target=g3537.t1_1 172 191;ID=match$609_172_191;signature_desc=consensus disorder prediction;Name=mobidb-lite;status=T
g3537.t1_1	MobiDBLite	protein_match	1	134	.	+	.	date=18-12-2020;Target=g3537.t1_1 1 134;ID=match$610_1_134;signature_desc=consensus disorder prediction;Name=mobidb-lite;status=T
g14859.t1_1	.	polypeptide	1	152	.	+	.	ID=g14859.t1_1;md5=a03ce0f1af20bedee168e45807bfec63
g14859.t1_1	PANTHER	protein_match	4	141	7.3E-37	+	.	date=18-12-2020;Target=g14859.t1_1 4 141;ID=match$611_4_141;Name=PTHR33562:SF1;status=T
g14859.t1_1	Pfam	protein_match	20	123	1.8E-14	+	.	date=18-12-2020;Target=g14859.t1_1 20 123;Ontology_term="GO:0030431","GO:0032222","GO:1903818";ID=match$612_20_123;signature_desc=Sleepless protein;Name=PF17064;status=T;Dbxref="InterPro:IPR031424"
g14859.t1_1	PANTHER	protein_match	4	141	7.3E-37	+	.	date=18-12-2020;Target=g14859.t1_1 4 141;ID=match$613_4_141;Name=PTHR33562;status=T
g17497.t1_1	.	polypeptide	1	1547	.	+	.	ID=g17497.t1_1;md5=f3d7aa90fdd2887601bf236a50cc99e1
g17497.t1_1	MobiDBLite	protein_match	1	21	.	+	.	date=18-12-2020;Target=g17497.t1_1 1 21;ID=match$614_1_21;signature_desc=consensus disorder prediction;Name=mobidb-lite;status=T
g17497.t1_1	MobiDBLite	protein_match	568	598	.	+	.	date=18-12-2020;Target=g17497.t1_1 568 598;ID=match$615_568_598;signature_desc=consensus disorder prediction;Name=mobidb-lite;status=T
g17497.t1_1	CDD	protein_match	1509	1546	7.73579E-10	+	.	date=18-12-2020;Target=g17497.t1_1 1509 1546;ID=match$616_1509_1546;signature_desc=SOCS_SOCS_like;Name=cd03717;status=T
g17497.t1_1	MobiDBLite	protein_match	1	61	.	+	.	date=18-12-2020;Target=g17497.t1_1 1 61;ID=match$617_1_61;signature_desc=consensus disorder prediction;Name=mobidb-lite;status=T
g17497.t1_1	SUPERFAMILY	protein_match	1512	1546	1.22E-6	+	.	date=18-12-2020;Target=g17497.t1_1 1512 1546;Ontology_term="GO:0035556";ID=match$618_1512_1546;Name=SSF158235;status=T;Dbxref="InterPro:IPR036036"
g17497.t1_1	MobiDBLite	protein_match	26	45	.	+	.	date=18-12-2020;Target=g17497.t1_1 26 45;ID=match$619_26_45;signature_desc=consensus disorder prediction;Name=mobidb-lite;status=T
g17497.t1_1	MobiDBLite	protein_match	739	798	.	+	.	date=18-12-2020;Target=g17497.t1_1 739 798;ID=match$620_739_798;signature_desc=consensus disorder prediction;Name=mobidb-lite;status=T
g17497.t1_1	MobiDBLite	protein_match	492	514	.	+	.	date=18-12-2020;Target=g17497.t1_1 492 514;ID=match$621_492_514;signature_desc=consensus disorder prediction;Name=mobidb-lite;status=T
g17497.t1_1	CDD	protein_match	1316	1506	2.14966E-40	+	.	date=18-12-2020;Target=g17497.t1_1 1316 1506;ID=match$622_1316_1506;signature_desc=SPRY_NHR_like;Name=cd12887;status=T
g17497.t1_1	MobiDBLite	protein_match	635	655	.	+	.	date=18-12-2020;Target=g17497.t1_1 635 655;ID=match$623_635_655;signature_desc=consensus disorder prediction;Name=mobidb-lite;status=T
g17497.t1_1	Pfam	protein_match	1513	1545	2.9E-5	+	.	date=18-12-2020;Target=g17497.t1_1 1513 1545;ID=match$624_1513_1545;signature_desc=SOCS box;Name=PF07525;status=T;Dbxref="InterPro:IPR001496"
g17497.t1_1	Gene3D	protein_match	1314	1506	4.1E-28	+	.	date=18-12-2020;Target=g17497.t1_1 1314 1506;ID=match$625_1314_1506;Name=G3DSA:2.60.120.920;status=T;Dbxref="InterPro:IPR043136"
g17497.t1_1	PANTHER	protein_match	1317	1546	5.6E-49	+	.	date=18-12-2020;Target=g17497.t1_1 1317 1546;ID=match$626_1317_1546;Name=PTHR12429:SF8;status=T
g17497.t1_1	ProSiteProfiles	protein_match	1307	1508	23.814	+	.	date=18-12-2020;Target=g17497.t1_1 1307 1508;ID=match$627_1307_1508;signature_desc=Neuralized homology repeat (NHR) domain profile.;Name=PS51065;status=T;Dbxref="InterPro:IPR006573"
g17497.t1_1	MobiDBLite	protein_match	622	702	.	+	.	date=18-12-2020;Target=g17497.t1_1 622 702;ID=match$628_622_702;signature_desc=consensus disorder prediction;Name=mobidb-lite;status=T
g17497.t1_1	Pfam	protein_match	1316	1506	5.1E-27	+	.	date=18-12-2020;Target=g17497.t1_1 1316 1506;ID=match$629_1316_1506;signature_desc=Neuralized;Name=PF07177;status=T;Dbxref="InterPro:IPR006573"
g17497.t1_1	MobiDBLite	protein_match	87	157	.	+	.	date=18-12-2020;Target=g17497.t1_1 87 157;ID=match$630_87_157;signature_desc=consensus disorder prediction;Name=mobidb-lite;status=T
g17497.t1_1	MobiDBLite	protein_match	672	694	.	+	.	date=18-12-2020;Target=g17497.t1_1 672 694;ID=match$631_672_694;signature_desc=consensus disorder prediction;Name=mobidb-lite;status=T
g17497.t1_1	SMART	protein_match	1511	1547	2.6E-4	+	.	date=18-12-2020;Target=g17497.t1_1 1511 1547;ID=match$632_1511_1547;Name=SM00969;status=T;Dbxref="InterPro:IPR001496"
g17497.t1_1	ProSiteProfiles	protein_match	1513	1547	10.877	+	.	date=18-12-2020;Target=g17497.t1_1 1513 1547;ID=match$633_1513_1547;signature_desc=SOCS box domain profile.;Name=PS50225;status=T;Dbxref="InterPro:IPR001496"
g17497.t1_1	PANTHER	protein_match	1317	1546	5.6E-49	+	.	date=18-12-2020;Target=g17497.t1_1 1317 1546;ID=match$634_1317_1546;Name=PTHR12429;status=T;Dbxref="InterPro:IPR037962"
g17497.t1_1	MobiDBLite	protein_match	462	522	.	+	.	date=18-12-2020;Target=g17497.t1_1 462 522;ID=match$635_462_522;signature_desc=consensus disorder prediction;Name=mobidb-lite;status=T
g17497.t1_1	MobiDBLite	protein_match	813	834	.	+	.	date=18-12-2020;Target=g17497.t1_1 813 834;ID=match$636_813_834;signature_desc=consensus disorder prediction;Name=mobidb-lite;status=T
g17497.t1_1	MobiDBLite	protein_match	362	395	.	+	.	date=18-12-2020;Target=g17497.t1_1 362 395;ID=match$637_362_395;signature_desc=consensus disorder prediction;Name=mobidb-lite;status=T
g17497.t1_1	MobiDBLite	protein_match	130	144	.	+	.	date=18-12-2020;Target=g17497.t1_1 130 144;ID=match$638_130_144;signature_desc=consensus disorder prediction;Name=mobidb-lite;status=T
g17497.t1_1	MobiDBLite	protein_match	251	283	.	+	.	date=18-12-2020;Target=g17497.t1_1 251 283;ID=match$639_251_283;signature_desc=consensus disorder prediction;Name=mobidb-lite;status=T
g17497.t1_1	SMART	protein_match	1310	1417	1.6E-6	+	.	date=18-12-2020;Target=g17497.t1_1 1310 1417;ID=match$640_1310_1417;Name=SM00588;status=T;Dbxref="InterPro:IPR006573"
g17497.t1_1	MobiDBLite	protein_match	328	346	.	+	.	date=18-12-2020;Target=g17497.t1_1 328 346;ID=match$641_328_346;signature_desc=consensus disorder prediction;Name=mobidb-lite;status=T
g17497.t1_1	MobiDBLite	protein_match	268	283	.	+	.	date=18-12-2020;Target=g17497.t1_1 268 283;ID=match$642_268_283;signature_desc=consensus disorder prediction;Name=mobidb-lite;status=T
g17497.t1_1	MobiDBLite	protein_match	328	395	.	+	.	date=18-12-2020;Target=g17497.t1_1 328 395;ID=match$643_328_395;signature_desc=consensus disorder prediction;Name=mobidb-lite;status=T
g14534.t1_1	.	polypeptide	1	67	.	+	.	ID=g14534.t1_1;md5=177313007e99725f2da8920f44dba037
g14534.t1_1	SMART	protein_match	9	48	5.2E-5	+	.	date=18-12-2020;Target=g14534.t1_1 9 48;Ontology_term="GO:0005515";ID=match$644_9_48;Name=SM00320;status=T;Dbxref="InterPro:IPR001680"
g14534.t1_1	ProSiteProfiles	protein_match	1	57	12.71	+	.	date=18-12-2020;Target=g14534.t1_1 1 57;Ontology_term="GO:0005515";ID=match$645_1_57;signature_desc=Trp-Asp (WD) repeats circular profile.;Name=PS50294;status=T;Dbxref="InterPro:IPR017986"
g14534.t1_1	SUPERFAMILY	protein_match	2	55	2.52E-10	+	.	date=18-12-2020;Target=g14534.t1_1 2 55;Ontology_term="GO:0005515";ID=match$646_2_55;Name=SSF50978;status=T;Dbxref="InterPro:IPR036322"
g14534.t1_1	Gene3D	protein_match	1	65	2.0E-11	+	.	date=18-12-2020;Target=g14534.t1_1 1 65;Ontology_term="GO:0005515";ID=match$647_1_65;Name=G3DSA:2.130.10.10;status=T;Dbxref="InterPro:IPR015943"
g14534.t1_1	PANTHER	protein_match	1	65	1.9E-16	+	.	date=18-12-2020;Target=g14534.t1_1 1 65;ID=match$648_1_65;Name=PTHR19854:SF15;status=T
g14534.t1_1	PANTHER	protein_match	1	65	1.9E-16	+	.	date=18-12-2020;Target=g14534.t1_1 1 65;ID=match$649_1_65;Name=PTHR19854;status=T
g15786.t1_1	.	polypeptide	1	526	.	+	.	ID=g15786.t1_1;md5=843761f2bf42ee3af08fa50f6b8ebda0
g15786.t1_1	MobiDBLite	protein_match	411	526	.	+	.	date=18-12-2020;Target=g15786.t1_1 411 526;ID=match$650_411_526;signature_desc=consensus disorder prediction;Name=mobidb-lite;status=T
g15786.t1_1	MobiDBLite	protein_match	456	477	.	+	.	date=18-12-2020;Target=g15786.t1_1 456 477;ID=match$651_456_477;signature_desc=consensus disorder prediction;Name=mobidb-lite;status=T
g15786.t1_1	MobiDBLite	protein_match	478	500	.	+	.	date=18-12-2020;Target=g15786.t1_1 478 500;ID=match$652_478_500;signature_desc=consensus disorder prediction;Name=mobidb-lite;status=T
g15786.t1_1	MobiDBLite	protein_match	75	95	.	+	.	date=18-12-2020;Target=g15786.t1_1 75 95;ID=match$653_75_95;signature_desc=consensus disorder prediction;Name=mobidb-lite;status=T
g9428.t1_1	.	polypeptide	1	240	.	+	.	ID=g9428.t1_1;md5=9b0c517e86157d23fd756837fb99cd84
g9428.t1_1	MobiDBLite	protein_match	74	115	.	+	.	date=18-12-2020;Target=g9428.t1_1 74 115;ID=match$659_74_115;signature_desc=consensus disorder prediction;Name=mobidb-lite;status=T
g9428.t1_1	MobiDBLite	protein_match	116	130	.	+	.	date=18-12-2020;Target=g9428.t1_1 116 130;ID=match$660_116_130;signature_desc=consensus disorder prediction;Name=mobidb-lite;status=T
g9428.t1_1	MobiDBLite	protein_match	52	67	.	+	.	date=18-12-2020;Target=g9428.t1_1 52 67;ID=match$661_52_67;signature_desc=consensus disorder prediction;Name=mobidb-lite;status=T
g9428.t1_1	Coils	protein_match	82	127	.	+	.	date=18-12-2020;Target=g9428.t1_1 82 127;ID=match$662_82_127;Name=Coil;status=T
g9428.t1_1	MobiDBLite	protein_match	15	37	.	+	.	date=18-12-2020;Target=g9428.t1_1 15 37;ID=match$663_15_37;signature_desc=consensus disorder prediction;Name=mobidb-lite;status=T
g9428.t1_1	Pfam	protein_match	42	233	6.9E-37	+	.	date=18-12-2020;Target=g9428.t1_1 42 233;ID=match$664_42_233;signature_desc=Nuclear RNA-splicing-associated protein;Name=PF10500;status=T;Dbxref="InterPro:IPR019532"
g9428.t1_1	PANTHER	protein_match	70	222	1.9E-16	+	.	date=18-12-2020;Target=g9428.t1_1 70 222;ID=match$665_70_222;Name=PTHR13595:SF1;status=T
g9428.t1_1	MobiDBLite	protein_match	1	156	.	+	.	date=18-12-2020;Target=g9428.t1_1 1 156;ID=match$666_1_156;signature_desc=consensus disorder prediction;Name=mobidb-lite;status=T
g9428.t1_1	PANTHER	protein_match	70	222	1.9E-16	+	.	date=18-12-2020;Target=g9428.t1_1 70 222;ID=match$667_70_222;Name=PTHR13595;status=T
g11875.t1_1	.	polypeptide	1	888	.	+	.	ID=g11875.t1_1;md5=e2cf3cd2e283b4b07c4d7e57b5977a10
g11875.t1_1	PANTHER	protein_match	17	291	7.0E-129	+	.	date=18-12-2020;Target=g11875.t1_1 17 291;ID=match$668_17_291;Name=PTHR31927:SF15;status=T
g11875.t1_1	PANTHER	protein_match	498	797	7.0E-129	+	.	date=18-12-2020;Target=g11875.t1_1 498 797;ID=match$668_498_797;Name=PTHR31927:SF15;status=T
g11875.t1_1	SMART	protein_match	195	288	1.1E-19	+	.	date=18-12-2020;Target=g11875.t1_1 195 288;ID=match$669_195_288;Name=SM00690;status=T;Dbxref="InterPro:IPR004145"
g11875.t1_1	SMART	protein_match	647	743	6.4E-26	+	.	date=18-12-2020;Target=g11875.t1_1 647 743;ID=match$669_647_743;Name=SM00690;status=T;Dbxref="InterPro:IPR004145"
g11875.t1_1	Pfam	protein_match	195	285	1.1E-23	+	.	date=18-12-2020;Target=g11875.t1_1 195 285;ID=match$670_195_285;signature_desc=Domain of unknown function (DUF243);Name=PF03103;status=T;Dbxref="InterPro:IPR004145"
g11875.t1_1	Pfam	protein_match	649	740	9.6E-25	+	.	date=18-12-2020;Target=g11875.t1_1 649 740;ID=match$670_649_740;signature_desc=Domain of unknown function (DUF243);Name=PF03103;status=T;Dbxref="InterPro:IPR004145"
g11875.t1_1	PANTHER	protein_match	17	291	7.0E-129	+	.	date=18-12-2020;Target=g11875.t1_1 17 291;ID=match$671_17_291;Name=PTHR31927;status=T
g11875.t1_1	PANTHER	protein_match	498	797	7.0E-129	+	.	date=18-12-2020;Target=g11875.t1_1 498 797;ID=match$671_498_797;Name=PTHR31927;status=T
g15045.t1_1	.	polypeptide	1	308	.	+	.	ID=g15045.t1_1;md5=b6ece30397b323e59b2c590455d68406
g15045.t1_1	MobiDBLite	protein_match	1	48	.	+	.	date=18-12-2020;Target=g15045.t1_1 1 48;ID=match$672_1_48;signature_desc=consensus disorder prediction;Name=mobidb-lite;status=T
g15045.t1_1	MobiDBLite	protein_match	97	140	.	+	.	date=18-12-2020;Target=g15045.t1_1 97 140;ID=match$673_97_140;signature_desc=consensus disorder prediction;Name=mobidb-lite;status=T
g15045.t1_1	MobiDBLite	protein_match	92	142	.	+	.	date=18-12-2020;Target=g15045.t1_1 92 142;ID=match$674_92_142;signature_desc=consensus disorder prediction;Name=mobidb-lite;status=T
g8042.t1_1	.	polypeptide	1	1002	.	+	.	ID=g8042.t1_1;md5=86effd79b1bf191ea279b5c4b3713142
g8042.t1_1	Gene3D	protein_match	213	289	3.7E-17	+	.	date=18-12-2020;Target=g8042.t1_1 213 289;ID=match$675_213_289;Name=G3DSA:1.10.20.130;status=T
g8042.t1_1	ProSitePatterns	protein_match	20	55	.	+	.	date=18-12-2020;Target=g8042.t1_1 20 55;Ontology_term="GO:0003677","GO:0008270";ID=match$676_20_55;signature_desc=Poly(ADP-ribose) polymerase zinc finger domain signature.;Name=PS00347;status=T;Dbxref="InterPro:IPR001510"
g8042.t1_1	ProSiteProfiles	protein_match	651	768	41.531	+	.	date=18-12-2020;Target=g8042.t1_1 651 768;Ontology_term="GO:0003950","GO:0006471";ID=match$677_651_768;signature_desc=PARP alpha-helical domain profile.;Name=PS51060;status=T;Dbxref="InterPro:IPR004102"
g8042.t1_1	CDD	protein_match	651	996	2.11496E-169	+	.	date=18-12-2020;Target=g8042.t1_1 651 996;ID=match$678_651_996;signature_desc=parp_like;Name=cd01437;status=T
g8042.t1_1	SMART	protein_match	542	622	3.0E-32	+	.	date=18-12-2020;Target=g8042.t1_1 542 622;ID=match$679_542_622;Name=SM00773;status=T;Dbxref="InterPro:IPR008893"
g8042.t1_1	ProSiteProfiles	protein_match	118	207	30.466	+	.	date=18-12-2020;Target=g8042.t1_1 118 207;Ontology_term="GO:0003677","GO:0008270";ID=match$680_118_207;signature_desc=Poly(ADP-ribose) polymerase zinc finger domain profile.;Name=PS50064;status=T;Dbxref="InterPro:IPR001510"
g8042.t1_1	ProSiteProfiles	protein_match	777	1002	103.175	+	.	date=18-12-2020;Target=g8042.t1_1 777 1002;Ontology_term="GO:0003950";ID=match$681_777_1002;signature_desc=PARP catalytic domain profile.;Name=PS51059;status=T;Dbxref="InterPro:IPR012317"
g8042.t1_1	Gene3D	protein_match	507	651	3.4E-47	+	.	date=18-12-2020;Target=g8042.t1_1 507 651;ID=match$682_507_651;Name=G3DSA:2.20.140.10;status=T;Dbxref="InterPro:IPR036930"
g8042.t1_1	Pfam	protein_match	652	783	1.0E-44	+	.	date=18-12-2020;Target=g8042.t1_1 652 783;Ontology_term="GO:0003950","GO:0006471";ID=match$683_652_783;signature_desc=Poly(ADP-ribose) polymerase, regulatory domain;Name=PF02877;status=T;Dbxref="InterPro:IPR004102"
g8042.t1_1	Pfam	protein_match	542	620	6.5E-25	+	.	date=18-12-2020;Target=g8042.t1_1 542 620;ID=match$684_542_620;signature_desc=WGR domain;Name=PF05406;status=T;Dbxref="InterPro:IPR008893"
g8042.t1_1	CDD	protein_match	391	464	4.36639E-23	+	.	date=18-12-2020;Target=g8042.t1_1 391 464;ID=match$685_391_464;signature_desc=BRCT_PARP1;Name=cd17747;status=T
g8042.t1_1	PANTHER	protein_match	49	995	8.5E-262	+	.	date=18-12-2020;Target=g8042.t1_1 49 995;ID=match$686_49_995;Name=PTHR10459;status=T
g8042.t1_1	SMART	protein_match	388	467	2.3E-4	+	.	date=18-12-2020;Target=g8042.t1_1 388 467;ID=match$687_388_467;Name=SM00292;status=T;Dbxref="InterPro:IPR001357"
g8042.t1_1	SUPERFAMILY	protein_match	786	1000	5.66E-76	+	.	date=18-12-2020;Target=g8042.t1_1 786 1000;ID=match$688_786_1000;Name=SSF56399;status=T
g8042.t1_1	SMART	protein_match	278	332	6.6E-26	+	.	date=18-12-2020;Target=g8042.t1_1 278 332;ID=match$689_278_332;Name=SM01335;status=T;Dbxref="InterPro:IPR012982"
g8042.t1_1	Gene3D	protein_match	654	995	3.0E-149	+	.	date=18-12-2020;Target=g8042.t1_1 654 995;ID=match$690_654_995;Name=G3DSA:3.90.228.10;status=T
g8042.t1_1	SUPERFAMILY	protein_match	114	222	9.27E-25	+	.	date=18-12-2020;Target=g8042.t1_1 114 222;ID=match$691_114_222;Name=SSF57716;status=T
g8042.t1_1	Gene3D	protein_match	290	351	8.3E-19	+	.	date=18-12-2020;Target=g8042.t1_1 290 351;ID=match$692_290_351;Name=G3DSA:2.20.25.630;status=T;Dbxref="InterPro:IPR038650"
g8042.t1_1	SUPERFAMILY	protein_match	5	86	4.92E-25	+	.	date=18-12-2020;Target=g8042.t1_1 5 86;ID=match$693_5_86;Name=SSF57716;status=T
g8042.t1_1	SUPERFAMILY	protein_match	509	634	6.93E-40	+	.	date=18-12-2020;Target=g8042.t1_1 509 634;ID=match$694_509_634;Name=SSF142921;status=T;Dbxref="InterPro:IPR036930"
g8042.t1_1	PANTHER	protein_match	49	995	8.5E-262	+	.	date=18-12-2020;Target=g8042.t1_1 49 995;ID=match$695_49_995;Name=PTHR10459:SF80;status=T
g8042.t1_1	SMART	protein_match	11	87	2.9E-37	+	.	date=18-12-2020;Target=g8042.t1_1 11 87;Ontology_term="GO:0003677","GO:0008270";ID=match$696_11_87;Name=SM01336;status=T;Dbxref="InterPro:IPR001510"
g8042.t1_1	SMART	protein_match	121	204	8.6E-28	+	.	date=18-12-2020;Target=g8042.t1_1 121 204;Ontology_term="GO:0003677","GO:0008270";ID=match$696_121_204;Name=SM01336;status=T;Dbxref="InterPro:IPR001510"
g8042.t1_1	ProSiteProfiles	protein_match	8	90	31.098	+	.	date=18-12-2020;Target=g8042.t1_1 8 90;Ontology_term="GO:0003677","GO:0008270";ID=match$697_8_90;signature_desc=Poly(ADP-ribose) polymerase zinc finger domain profile.;Name=PS50064;status=T;Dbxref="InterPro:IPR001510"
g8042.t1_1	CDD	protein_match	532	636	7.54867E-49	+	.	date=18-12-2020;Target=g8042.t1_1 532 636;ID=match$698_532_636;signature_desc=WGR_PARP1_like;Name=cd08001;status=T
g8042.t1_1	ProSiteProfiles	protein_match	386	461	10.78	+	.	date=18-12-2020;Target=g8042.t1_1 386 461;ID=match$699_386_461;signature_desc=BRCT domain profile.;Name=PS50172;status=T;Dbxref="InterPro:IPR001357"
g8042.t1_1	Pfam	protein_match	279	331	1.2E-18	+	.	date=18-12-2020;Target=g8042.t1_1 279 331;ID=match$700_279_331;signature_desc=PADR1 (NUC008) domain;Name=PF08063;status=T;Dbxref="InterPro:IPR012982"
g8042.t1_1	Gene3D	protein_match	114	204	7.0E-21	+	.	date=18-12-2020;Target=g8042.t1_1 114 204;Ontology_term="GO:0003677","GO:0008270";ID=match$701_114_204;Name=G3DSA:3.30.1740.10;status=T;Dbxref="InterPro:IPR036957"
g8042.t1_1	PIRSF	protein_match	1	1001	0.0	+	.	date=18-12-2020;Target=g8042.t1_1 1 1001;Ontology_term="GO:0003677","GO:0003950","GO:0005634","GO:0006471","GO:0008270","GO:0051287";ID=match$702_1_1001;Name=PIRSF000489;status=T;Dbxref="InterPro:IPR008288"
g8042.t1_1	Coils	protein_match	213	233	.	+	.	date=18-12-2020;Target=g8042.t1_1 213 233;ID=match$703_213_233;Name=Coil;status=T
g8042.t1_1	SUPERFAMILY	protein_match	387	466	2.76E-8	+	.	date=18-12-2020;Target=g8042.t1_1 387 466;ID=match$704_387_466;Name=SSF52113;status=T;Dbxref="InterPro:IPR036420"
g8042.t1_1	Pfam	protein_match	797	996	1.0E-74	+	.	date=18-12-2020;Target=g8042.t1_1 797 996;Ontology_term="GO:0003950";ID=match$705_797_996;signature_desc=Poly(ADP-ribose) polymerase catalytic domain;Name=PF00644;status=T;Dbxref="InterPro:IPR012317"
g8042.t1_1	Pfam	protein_match	11	85	2.4E-17	+	.	date=18-12-2020;Target=g8042.t1_1 11 85;Ontology_term="GO:0003677","GO:0008270";ID=match$706_11_85;signature_desc=Poly(ADP-ribose) polymerase and DNA-Ligase Zn-finger region;Name=PF00645;status=T;Dbxref="InterPro:IPR001510"
g8042.t1_1	Pfam	protein_match	121	202	7.3E-14	+	.	date=18-12-2020;Target=g8042.t1_1 121 202;Ontology_term="GO:0003677","GO:0008270";ID=match$706_121_202;signature_desc=Poly(ADP-ribose) polymerase and DNA-Ligase Zn-finger region;Name=PF00645;status=T;Dbxref="InterPro:IPR001510"
g8042.t1_1	Pfam	protein_match	388	461	1.2E-5	+	.	date=18-12-2020;Target=g8042.t1_1 388 461;ID=match$707_388_461;signature_desc=BRCA1 C Terminus (BRCT) domain;Name=PF00533;status=T;Dbxref="InterPro:IPR001357"
g8042.t1_1	Gene3D	protein_match	667	774	3.0E-149	+	.	date=18-12-2020;Target=g8042.t1_1 667 774;Ontology_term="GO:0003950","GO:0006471";ID=match$708_667_774;Name=G3DSA:1.20.142.10;status=T;Dbxref="InterPro:IPR036616"
g8042.t1_1	Gene3D	protein_match	1	106	4.2E-28	+	.	date=18-12-2020;Target=g8042.t1_1 1 106;Ontology_term="GO:0003677","GO:0008270";ID=match$709_1_106;Name=G3DSA:3.30.1740.10;status=T;Dbxref="InterPro:IPR036957"
g8042.t1_1	Gene3D	protein_match	383	490	1.8E-26	+	.	date=18-12-2020;Target=g8042.t1_1 383 490;ID=match$710_383_490;Name=G3DSA:3.40.50.10190;status=T;Dbxref="InterPro:IPR036420"
g8042.t1_1	SUPERFAMILY	protein_match	651	787	1.57E-44	+	.	date=18-12-2020;Target=g8042.t1_1 651 787;Ontology_term="GO:0003950","GO:0006471";ID=match$711_651_787;Name=SSF47587;status=T;Dbxref="InterPro:IPR036616"
g12458.t1_1	.	polypeptide	1	801	.	+	.	ID=g12458.t1_1;md5=2a6d8daffd875bb5c23ae67522f41ea0
g12458.t1_1	Coils	protein_match	671	698	.	+	.	date=18-12-2020;Target=g12458.t1_1 671 698;ID=match$712_671_698;Name=Coil;status=T
g12458.t1_1	MobiDBLite	protein_match	152	166	.	+	.	date=18-12-2020;Target=g12458.t1_1 152 166;ID=match$713_152_166;signature_desc=consensus disorder prediction;Name=mobidb-lite;status=T
g12458.t1_1	Coils	protein_match	400	420	.	+	.	date=18-12-2020;Target=g12458.t1_1 400 420;ID=match$714_400_420;Name=Coil;status=T
g12458.t1_1	SUPERFAMILY	protein_match	374	610	1.46E-22	+	.	date=18-12-2020;Target=g12458.t1_1 374 610;ID=match$715_374_610;Name=SSF103657;status=T;Dbxref="InterPro:IPR027267"
g12458.t1_1	MobiDBLite	protein_match	43	87	.	+	.	date=18-12-2020;Target=g12458.t1_1 43 87;ID=match$716_43_87;signature_desc=consensus disorder prediction;Name=mobidb-lite;status=T
g12458.t1_1	MobiDBLite	protein_match	312	350	.	+	.	date=18-12-2020;Target=g12458.t1_1 312 350;ID=match$717_312_350;signature_desc=consensus disorder prediction;Name=mobidb-lite;status=T
g12458.t1_1	MobiDBLite	protein_match	253	289	.	+	.	date=18-12-2020;Target=g12458.t1_1 253 289;ID=match$718_253_289;signature_desc=consensus disorder prediction;Name=mobidb-lite;status=T
g12458.t1_1	MobiDBLite	protein_match	104	120	.	+	.	date=18-12-2020;Target=g12458.t1_1 104 120;ID=match$719_104_120;signature_desc=consensus disorder prediction;Name=mobidb-lite;status=T
g12458.t1_1	MobiDBLite	protein_match	312	331	.	+	.	date=18-12-2020;Target=g12458.t1_1 312 331;ID=match$720_312_331;signature_desc=consensus disorder prediction;Name=mobidb-lite;status=T
g12458.t1_1	MobiDBLite	protein_match	754	801	.	+	.	date=18-12-2020;Target=g12458.t1_1 754 801;ID=match$721_754_801;signature_desc=consensus disorder prediction;Name=mobidb-lite;status=T
g12458.t1_1	Gene3D	protein_match	360	608	8.3E-31	+	.	date=18-12-2020;Target=g12458.t1_1 360 608;ID=match$722_360_608;Name=G3DSA:1.20.1270.60;status=T;Dbxref="InterPro:IPR027267"
g12458.t1_1	MobiDBLite	protein_match	1	210	.	+	.	date=18-12-2020;Target=g12458.t1_1 1 210;ID=match$723_1_210;signature_desc=consensus disorder prediction;Name=mobidb-lite;status=T
g2478.t1_1	.	polypeptide	1	627	.	+	.	ID=g2478.t1_1;md5=40c6a6eae51da9cfdb0c7df2152fdda4
g2478.t1_1	Coils	protein_match	150	170	.	+	.	date=18-12-2020;Target=g2478.t1_1 150 170;ID=match$724_150_170;Name=Coil;status=T
g2478.t1_1	Coils	protein_match	98	118	.	+	.	date=18-12-2020;Target=g2478.t1_1 98 118;ID=match$725_98_118;Name=Coil;status=T
g2478.t1_1	Coils	protein_match	424	475	.	+	.	date=18-12-2020;Target=g2478.t1_1 424 475;ID=match$726_424_475;Name=Coil;status=T
g2478.t1_1	Coils	protein_match	202	306	.	+	.	date=18-12-2020;Target=g2478.t1_1 202 306;ID=match$727_202_306;Name=Coil;status=T
g2478.t1_1	ProSiteProfiles	protein_match	1	26	5.0	+	.	date=18-12-2020;Target=g2478.t1_1 1 26;ID=match$728_1_26;signature_desc=Prokaryotic membrane lipoprotein lipid attachment site profile.;Name=PS51257;status=T
g12638.t1_1	.	polypeptide	1	616	.	+	.	ID=g12638.t1_1;md5=961b469de4e00618f830494faf40636f
g12638.t1_1	Coils	protein_match	176	178	.	+	.	date=18-12-2020;Target=g12638.t1_1 176 178;ID=match$729_176_178;Name=Coil;status=T
g12638.t1_1	ProSitePatterns	protein_match	65	77	.	+	.	date=18-12-2020;Target=g12638.t1_1 65 77;Ontology_term="GO:0006857","GO:0016020","GO:0022857";ID=match$730_65_77;signature_desc=PTR2 family proton/oligopeptide symporters signature 2.;Name=PS01023;status=T;Dbxref="InterPro:IPR018456"
g12638.t1_1	Gene3D	protein_match	1	297	1.5E-64	+	.	date=18-12-2020;Target=g12638.t1_1 1 297;ID=match$731_1_297;Name=G3DSA:1.20.1250.20;status=T
g12638.t1_1	Pfam	protein_match	473	537	6.7E-13	+	.	date=18-12-2020;Target=g12638.t1_1 473 537;Ontology_term="GO:0016020","GO:0022857","GO:0055085";ID=match$732_473_537;signature_desc=POT family;Name=PF00854;status=T;Dbxref="InterPro:IPR000109"
g12638.t1_1	Pfam	protein_match	2	169	1.3E-47	+	.	date=18-12-2020;Target=g12638.t1_1 2 169;Ontology_term="GO:0016020","GO:0022857","GO:0055085";ID=match$732_2_169;signature_desc=POT family;Name=PF00854;status=T;Dbxref="InterPro:IPR000109"
g12638.t1_1	Pfam	protein_match	196	294	2.3E-22	+	.	date=18-12-2020;Target=g12638.t1_1 196 294;Ontology_term="GO:0016020","GO:0022857","GO:0055085";ID=match$732_196_294;signature_desc=POT family;Name=PF00854;status=T;Dbxref="InterPro:IPR000109"
g12638.t1_1	Gene3D	protein_match	428	584	8.9E-32	+	.	date=18-12-2020;Target=g12638.t1_1 428 584;ID=match$733_428_584;Name=G3DSA:1.20.1250.20;status=T
g12638.t1_1	PANTHER	protein_match	1	580	5.5E-175	+	.	date=18-12-2020;Target=g12638.t1_1 1 580;ID=match$734_1_580;Name=PTHR11654:SF465;status=T
g12638.t1_1	PANTHER	protein_match	1	580	5.5E-175	+	.	date=18-12-2020;Target=g12638.t1_1 1 580;Ontology_term="GO:0016020","GO:0022857","GO:0055085";ID=match$735_1_580;Name=PTHR11654;status=T;Dbxref="InterPro:IPR000109"
g12638.t1_1	SUPERFAMILY	protein_match	3	121	1.44E-7	+	.	date=18-12-2020;Target=g12638.t1_1 3 121;ID=match$736_3_121;Name=SSF103473;status=T;Dbxref="InterPro:IPR036259"
g16693.t1_1	.	polypeptide	1	117	.	+	.	ID=g16693.t1_1;md5=4d3166831c93c9ea32d781dc4da6cb76
g16693.t1_1	MobiDBLite	protein_match	1	44	.	+	.	date=18-12-2020;Target=g16693.t1_1 1 44;ID=match$748_1_44;signature_desc=consensus disorder prediction;Name=mobidb-lite;status=T
g16693.t1_1	MobiDBLite	protein_match	1	42	.	+	.	date=18-12-2020;Target=g16693.t1_1 1 42;ID=match$749_1_42;signature_desc=consensus disorder prediction;Name=mobidb-lite;status=T
g12996.t1_1	.	polypeptide	1	304	.	+	.	ID=g12996.t1_1;md5=de3da1534fe49c0e2f91f37c11329805
g12996.t1_1	CDD	protein_match	199	246	1.5798E-18	+	.	date=18-12-2020;Target=g12996.t1_1 199 246;ID=match$750_199_246;signature_desc=DD_cGKI-alpha;Name=cd12085;status=T
g12996.t1_1	MobiDBLite	protein_match	88	155	.	+	.	date=18-12-2020;Target=g12996.t1_1 88 155;ID=match$751_88_155;signature_desc=consensus disorder prediction;Name=mobidb-lite;status=T
g12996.t1_1	PANTHER	protein_match	136	300	1.3E-16	+	.	date=18-12-2020;Target=g12996.t1_1 136 300;ID=match$752_136_300;Name=PTHR24353;status=T
g12996.t1_1	MobiDBLite	protein_match	53	75	.	+	.	date=18-12-2020;Target=g12996.t1_1 53 75;ID=match$753_53_75;signature_desc=consensus disorder prediction;Name=mobidb-lite;status=T
g12996.t1_1	Pfam	protein_match	207	241	5.4E-16	+	.	date=18-12-2020;Target=g12996.t1_1 207 241;ID=match$754_207_241;signature_desc=Coiled-coil N-terminus of cGMP-dependent protein kinase;Name=PF16808;status=T;Dbxref="InterPro:IPR031831"
g12996.t1_1	Coils	protein_match	216	236	.	+	.	date=18-12-2020;Target=g12996.t1_1 216 236;ID=match$755_216_236;Name=Coil;status=T
g12996.t1_1	MobiDBLite	protein_match	88	127	.	+	.	date=18-12-2020;Target=g12996.t1_1 88 127;ID=match$756_88_127;signature_desc=consensus disorder prediction;Name=mobidb-lite;status=T
g12996.t1_1	Gene3D	protein_match	201	245	6.1E-8	+	.	date=18-12-2020;Target=g12996.t1_1 201 245;ID=match$757_201_245;Name=G3DSA:1.20.5.490;status=T
g12996.t1_1	PANTHER	protein_match	136	300	1.3E-16	+	.	date=18-12-2020;Target=g12996.t1_1 136 300;ID=match$758_136_300;Name=PTHR24353:SF130;status=T
g6554.t1_1	.	polypeptide	1	52	.	+	.	ID=g6554.t1_1;md5=4ee125113a727f45488070628373579b
g6554.t1_1	PRINTS	protein_match	6	28	3.7E-16	+	.	date=18-12-2020;Target=g6554.t1_1 6 28;Ontology_term="GO:0004618","GO:0006096";ID=match$759_6_28;signature_desc=Phosphoglycerate kinase family signature;Name=PR00477;status=T;Dbxref="InterPro:IPR001576"
g6554.t1_1	PRINTS	protein_match	35	52	3.7E-16	+	.	date=18-12-2020;Target=g6554.t1_1 35 52;Ontology_term="GO:0004618","GO:0006096";ID=match$759_35_52;signature_desc=Phosphoglycerate kinase family signature;Name=PR00477;status=T;Dbxref="InterPro:IPR001576"
g6554.t1_1	PANTHER	protein_match	2	51	5.9E-19	+	.	date=18-12-2020;Target=g6554.t1_1 2 51;Ontology_term="GO:0004618","GO:0006096";ID=match$760_2_51;Name=PTHR11406;status=T;Dbxref="InterPro:IPR001576"
g6554.t1_1	PANTHER	protein_match	2	51	5.9E-19	+	.	date=18-12-2020;Target=g6554.t1_1 2 51;ID=match$761_2_51;Name=PTHR11406:SF0;status=T
g6554.t1_1	Pfam	protein_match	2	51	2.0E-14	+	.	date=18-12-2020;Target=g6554.t1_1 2 51;Ontology_term="GO:0004618","GO:0006096";ID=match$762_2_51;signature_desc=Phosphoglycerate kinase;Name=PF00162;status=T;Dbxref="InterPro:IPR001576"
g6554.t1_1	Gene3D	protein_match	1	52	9.1E-18	+	.	date=18-12-2020;Target=g6554.t1_1 1 52;Ontology_term="GO:0004618","GO:0006096";ID=match$763_1_52;Name=G3DSA:3.40.50.1260;status=T;Dbxref="InterPro:IPR015824"
g6554.t1_1	SUPERFAMILY	protein_match	2	51	2.22E-15	+	.	date=18-12-2020;Target=g6554.t1_1 2 51;Ontology_term="GO:0004618","GO:0006096";ID=match$764_2_51;Name=SSF53748;status=T;Dbxref="InterPro:IPR036043"
g12722.t1_1	.	polypeptide	1	510	.	+	.	ID=g12722.t1_1;md5=ea2286a127b8ab0714143c40e6032a0d
g12722.t1_1	Coils	protein_match	8	28	.	+	.	date=18-12-2020;Target=g12722.t1_1 8 28;ID=match$765_8_28;Name=Coil;status=T
g12722.t1_1	PANTHER	protein_match	8	435	7.7E-15	+	.	date=18-12-2020;Target=g12722.t1_1 8 435;Ontology_term="GO:0000226","GO:0008017";ID=match$766_8_435;Name=PTHR19321;status=T;Dbxref="InterPro:IPR007145"
g12722.t1_1	MobiDBLite	protein_match	352	374	.	+	.	date=18-12-2020;Target=g12722.t1_1 352 374;ID=match$767_352_374;signature_desc=consensus disorder prediction;Name=mobidb-lite;status=T
g12722.t1_1	PANTHER	protein_match	8	435	7.7E-15	+	.	date=18-12-2020;Target=g12722.t1_1 8 435;ID=match$768_8_435;Name=PTHR19321:SF0;status=T
g12722.t1_1	MobiDBLite	protein_match	351	510	.	+	.	date=18-12-2020;Target=g12722.t1_1 351 510;ID=match$769_351_510;signature_desc=consensus disorder prediction;Name=mobidb-lite;status=T
g12722.t1_1	Pfam	protein_match	172	454	1.1E-14	+	.	date=18-12-2020;Target=g12722.t1_1 172 454;ID=match$770_172_454;signature_desc=Microtubule associated protein (MAP65/ASE1 family);Name=PF03999;status=T
g12722.t1_1	MobiDBLite	protein_match	92	107	.	+	.	date=18-12-2020;Target=g12722.t1_1 92 107;ID=match$771_92_107;signature_desc=consensus disorder prediction;Name=mobidb-lite;status=T
g12722.t1_1	Coils	protein_match	261	292	.	+	.	date=18-12-2020;Target=g12722.t1_1 261 292;ID=match$772_261_292;Name=Coil;status=T
g12722.t1_1	MobiDBLite	protein_match	82	113	.	+	.	date=18-12-2020;Target=g12722.t1_1 82 113;ID=match$773_82_113;signature_desc=consensus disorder prediction;Name=mobidb-lite;status=T
g12722.t1_1	Gene3D	protein_match	211	326	5.8E-13	+	.	date=18-12-2020;Target=g12722.t1_1 211 326;ID=match$774_211_326;Name=G3DSA:1.20.58.1520;status=T
g12722.t1_1	MobiDBLite	protein_match	419	481	.	+	.	date=18-12-2020;Target=g12722.t1_1 419 481;ID=match$775_419_481;signature_desc=consensus disorder prediction;Name=mobidb-lite;status=T
g17405.t1_1	.	polypeptide	1	73	.	+	.	ID=g17405.t1_1;md5=013ae36a2cd90dca783b093c5f901b88
g17405.t1_1	MobiDBLite	protein_match	1	29	.	+	.	date=18-12-2020;Target=g17405.t1_1 1 29;ID=match$776_1_29;signature_desc=consensus disorder prediction;Name=mobidb-lite;status=T
g17405.t1_1	MobiDBLite	protein_match	12	29	.	+	.	date=18-12-2020;Target=g17405.t1_1 12 29;ID=match$777_12_29;signature_desc=consensus disorder prediction;Name=mobidb-lite;status=T
g14487.t1_1	.	polypeptide	1	390	.	+	.	ID=g14487.t1_1;md5=4a23d128dfbc12bf008ca78e972170a4
g14487.t1_1	PIRSF	protein_match	2	349	4.0E-44	+	.	date=18-12-2020;Target=g14487.t1_1 2 349;ID=match$778_2_349;Name=PIRSF006060;status=T
g14487.t1_1	PANTHER	protein_match	158	366	1.1E-188	+	.	date=18-12-2020;Target=g14487.t1_1 158 366;ID=match$779_158_366;Name=PTHR11785:SF527;status=T
g14487.t1_1	PANTHER	protein_match	2	153	1.1E-188	+	.	date=18-12-2020;Target=g14487.t1_1 2 153;ID=match$780_2_153;Name=PTHR11785:SF527;status=T
g14487.t1_1	PANTHER	protein_match	2	153	1.1E-188	+	.	date=18-12-2020;Target=g14487.t1_1 2 153;ID=match$781_2_153;Name=PTHR11785;status=T
g14487.t1_1	Gene3D	protein_match	1	355	3.1E-54	+	.	date=18-12-2020;Target=g14487.t1_1 1 355;ID=match$782_1_355;Name=G3DSA:1.20.1740.10;status=T
g14487.t1_1	PANTHER	protein_match	158	366	1.1E-188	+	.	date=18-12-2020;Target=g14487.t1_1 158 366;ID=match$783_158_366;Name=PTHR11785;status=T
g14487.t1_1	Pfam	protein_match	3	307	9.9E-38	+	.	date=18-12-2020;Target=g14487.t1_1 3 307;Ontology_term="GO:0016020","GO:0022857","GO:0055085";ID=match$784_3_307;signature_desc=Amino acid permease;Name=PF13520;status=T;Dbxref="InterPro:IPR002293"
g12330.t1_1	.	polypeptide	1	640	.	+	.	ID=g12330.t1_1;md5=5836b37bc093e7248ba4029d78cec5b5
g12330.t1_1	CDD	protein_match	233	281	6.46051E-26	+	.	date=18-12-2020;Target=g12330.t1_1 233 281;ID=match$785_233_281;signature_desc=ZZ_dystrophin;Name=cd02334;status=T
g12330.t1_1	ProSiteProfiles	protein_match	229	276	12.388	+	.	date=18-12-2020;Target=g12330.t1_1 229 276;Ontology_term="GO:0008270";ID=match$786_229_276;signature_desc=Zinc finger ZZ-type profile.;Name=PS50135;status=T;Dbxref="InterPro:IPR000433"
g12330.t1_1	PIRSF	protein_match	1	547	1.1E-285	+	.	date=18-12-2020;Target=g12330.t1_1 1 547;ID=match$787_1_547;Name=PIRSF038204;status=T;Dbxref="InterPro:IPR017432"
g12330.t1_1	PIRSF	protein_match	576	638	3.4	+	.	date=18-12-2020;Target=g12330.t1_1 576 638;ID=match$787_576_638;Name=PIRSF038204;status=T;Dbxref="InterPro:IPR017432"
g12330.t1_1	SUPERFAMILY	protein_match	211	292	1.88E-18	+	.	date=18-12-2020;Target=g12330.t1_1 211 292;ID=match$788_211_292;Name=SSF57850;status=T
g12330.t1_1	MobiDBLite	protein_match	486	640	.	+	.	date=18-12-2020;Target=g12330.t1_1 486 640;ID=match$789_486_640;signature_desc=consensus disorder prediction;Name=mobidb-lite;status=T
g12330.t1_1	MobiDBLite	protein_match	571	585	.	+	.	date=18-12-2020;Target=g12330.t1_1 571 585;ID=match$790_571_585;signature_desc=consensus disorder prediction;Name=mobidb-lite;status=T
g12330.t1_1	PANTHER	protein_match	9	521	4.0E-198	+	.	date=18-12-2020;Target=g12330.t1_1 9 521;ID=match$791_9_521;Name=PTHR12268:SF22;status=T
g12330.t1_1	Coils	protein_match	413	447	.	+	.	date=18-12-2020;Target=g12330.t1_1 413 447;ID=match$792_413_447;Name=Coil;status=T
g12330.t1_1	MobiDBLite	protein_match	608	629	.	+	.	date=18-12-2020;Target=g12330.t1_1 608 629;ID=match$793_608_629;signature_desc=consensus disorder prediction;Name=mobidb-lite;status=T
g12330.t1_1	Gene3D	protein_match	224	284	9.4E-22	+	.	date=18-12-2020;Target=g12330.t1_1 224 284;ID=match$794_224_284;Name=G3DSA:3.30.60.90;status=T;Dbxref="InterPro:IPR043145"
g12330.t1_1	ProSitePatterns	protein_match	235	262	.	+	.	date=18-12-2020;Target=g12330.t1_1 235 262;Ontology_term="GO:0008270";ID=match$795_235_262;signature_desc=Zinc finger ZZ-type signature.;Name=PS01357;status=T;Dbxref="InterPro:IPR000433"
g12330.t1_1	CDD	protein_match	46	206	3.52277E-98	+	.	date=18-12-2020;Target=g12330.t1_1 46 206;ID=match$796_46_206;signature_desc=EFh_DTN;Name=cd16244;status=T
g12330.t1_1	SUPERFAMILY	protein_match	136	228	1.29E-23	+	.	date=18-12-2020;Target=g12330.t1_1 136 228;ID=match$797_136_228;Name=SSF47473;status=T;Dbxref="InterPro:IPR011992"
g12330.t1_1	MobiDBLite	protein_match	510	528	.	+	.	date=18-12-2020;Target=g12330.t1_1 510 528;ID=match$798_510_528;signature_desc=consensus disorder prediction;Name=mobidb-lite;status=T
g12330.t1_1	Pfam	protein_match	235	273	1.3E-8	+	.	date=18-12-2020;Target=g12330.t1_1 235 273;Ontology_term="GO:0008270";ID=match$799_235_273;signature_desc=Zinc finger, ZZ type;Name=PF00569;status=T;Dbxref="InterPro:IPR000433"
g12330.t1_1	Gene3D	protein_match	41	135	4.0E-19	+	.	date=18-12-2020;Target=g12330.t1_1 41 135;ID=match$800_41_135;Name=G3DSA:1.10.238.10;status=T
g12330.t1_1	SMART	protein_match	229	274	2.9E-12	+	.	date=18-12-2020;Target=g12330.t1_1 229 274;Ontology_term="GO:0008270";ID=match$801_229_274;Name=SM00291;status=T;Dbxref="InterPro:IPR000433"
g12330.t1_1	Coils	protein_match	478	498	.	+	.	date=18-12-2020;Target=g12330.t1_1 478 498;ID=match$802_478_498;Name=Coil;status=T
g12330.t1_1	PANTHER	protein_match	9	521	4.0E-198	+	.	date=18-12-2020;Target=g12330.t1_1 9 521;ID=match$803_9_521;Name=PTHR12268;status=T
g12330.t1_1	MobiDBLite	protein_match	491	509	.	+	.	date=18-12-2020;Target=g12330.t1_1 491 509;ID=match$804_491_509;signature_desc=consensus disorder prediction;Name=mobidb-lite;status=T
g12330.t1_1	Pfam	protein_match	136	224	8.5E-23	+	.	date=18-12-2020;Target=g12330.t1_1 136 224;ID=match$805_136_224;signature_desc=EF-hand;Name=PF09069;status=T;Dbxref="InterPro:IPR015154"
g12330.t1_1	Pfam	protein_match	10	132	5.1E-41	+	.	date=18-12-2020;Target=g12330.t1_1 10 132;ID=match$806_10_132;signature_desc=EF hand;Name=PF09068;status=T;Dbxref="InterPro:IPR015153"
g12330.t1_1	SUPERFAMILY	protein_match	16	133	2.04E-35	+	.	date=18-12-2020;Target=g12330.t1_1 16 133;ID=match$807_16_133;Name=SSF47473;status=T;Dbxref="InterPro:IPR011992"
g18195.t1_1	.	polypeptide	1	88	.	+	.	ID=g18195.t1_1;md5=744ad83450c65f70a0e7800ff44f1399
g18195.t1_1	MobiDBLite	protein_match	42	88	.	+	.	date=18-12-2020;Target=g18195.t1_1 42 88;ID=match$808_42_88;signature_desc=consensus disorder prediction;Name=mobidb-lite;status=T
g2988.t1_1	.	polypeptide	1	764	.	+	.	ID=g2988.t1_1;md5=40316b6688f22806a2010137ffc20997
g2988.t1_1	MobiDBLite	protein_match	233	257	.	+	.	date=18-12-2020;Target=g2988.t1_1 233 257;ID=match$809_233_257;signature_desc=consensus disorder prediction;Name=mobidb-lite;status=T
g2988.t1_1	Pfam	protein_match	570	590	2.0E-5	+	.	date=18-12-2020;Target=g2988.t1_1 570 590;ID=match$810_570_590;signature_desc=Zinc finger, C2H2 type;Name=PF00096;status=T;Dbxref="InterPro:IPR013087"
g2988.t1_1	Pfam	protein_match	540	562	0.0067	+	.	date=18-12-2020;Target=g2988.t1_1 540 562;ID=match$810_540_562;signature_desc=Zinc finger, C2H2 type;Name=PF00096;status=T;Dbxref="InterPro:IPR013087"
g2988.t1_1	ProSitePatterns	protein_match	514	534	.	+	.	date=18-12-2020;Target=g2988.t1_1 514 534;ID=match$811_514_534;signature_desc=Zinc finger C2H2 type domain signature.;Name=PS00028;status=T;Dbxref="InterPro:IPR013087"
g2988.t1_1	Coils	protein_match	297	328	.	+	.	date=18-12-2020;Target=g2988.t1_1 297 328;ID=match$812_297_328;Name=Coil;status=T
g2988.t1_1	PANTHER	protein_match	14	666	1.0E-256	+	.	date=18-12-2020;Target=g2988.t1_1 14 666;ID=match$813_14_666;Name=PTHR24393;status=T
g2988.t1_1	MobiDBLite	protein_match	588	659	.	+	.	date=18-12-2020;Target=g2988.t1_1 588 659;ID=match$814_588_659;signature_desc=consensus disorder prediction;Name=mobidb-lite;status=T
g2988.t1_1	Gene3D	protein_match	574	616	4.5E-5	+	.	date=18-12-2020;Target=g2988.t1_1 574 616;ID=match$815_574_616;Name=G3DSA:3.30.160.60;status=T
g2988.t1_1	PANTHER	protein_match	14	666	1.0E-256	+	.	date=18-12-2020;Target=g2988.t1_1 14 666;ID=match$816_14_666;Name=PTHR24393:SF40;status=T
g2988.t1_1	SUPERFAMILY	protein_match	480	530	1.03E-8	+	.	date=18-12-2020;Target=g2988.t1_1 480 530;ID=match$817_480_530;Name=SSF57667;status=T;Dbxref="InterPro:IPR036236"
g2988.t1_1	MobiDBLite	protein_match	449	467	.	+	.	date=18-12-2020;Target=g2988.t1_1 449 467;ID=match$818_449_467;signature_desc=consensus disorder prediction;Name=mobidb-lite;status=T
g2988.t1_1	MobiDBLite	protein_match	709	764	.	+	.	date=18-12-2020;Target=g2988.t1_1 709 764;ID=match$819_709_764;signature_desc=consensus disorder prediction;Name=mobidb-lite;status=T
g2988.t1_1	MobiDBLite	protein_match	318	353	.	+	.	date=18-12-2020;Target=g2988.t1_1 318 353;ID=match$820_318_353;signature_desc=consensus disorder prediction;Name=mobidb-lite;status=T
g2988.t1_1	ProSitePatterns	protein_match	542	562	.	+	.	date=18-12-2020;Target=g2988.t1_1 542 562;ID=match$821_542_562;signature_desc=Zinc finger C2H2 type domain signature.;Name=PS00028;status=T;Dbxref="InterPro:IPR013087"
g2988.t1_1	Gene3D	protein_match	447	536	2.6E-10	+	.	date=18-12-2020;Target=g2988.t1_1 447 536;ID=match$822_447_536;Name=G3DSA:3.30.160.60;status=T
g2988.t1_1	MobiDBLite	protein_match	233	281	.	+	.	date=18-12-2020;Target=g2988.t1_1 233 281;ID=match$823_233_281;signature_desc=consensus disorder prediction;Name=mobidb-lite;status=T
g2988.t1_1	MobiDBLite	protein_match	390	409	.	+	.	date=18-12-2020;Target=g2988.t1_1 390 409;ID=match$824_390_409;signature_desc=consensus disorder prediction;Name=mobidb-lite;status=T
g2988.t1_1	MobiDBLite	protein_match	602	659	.	+	.	date=18-12-2020;Target=g2988.t1_1 602 659;ID=match$825_602_659;signature_desc=consensus disorder prediction;Name=mobidb-lite;status=T
g2988.t1_1	SMART	protein_match	512	534	0.13	+	.	date=18-12-2020;Target=g2988.t1_1 512 534;ID=match$826_512_534;Name=SM00355;status=T;Dbxref="InterPro:IPR013087"
g2988.t1_1	SMART	protein_match	484	506	0.05	+	.	date=18-12-2020;Target=g2988.t1_1 484 506;ID=match$826_484_506;Name=SM00355;status=T;Dbxref="InterPro:IPR013087"
g2988.t1_1	SMART	protein_match	568	590	0.0086	+	.	date=18-12-2020;Target=g2988.t1_1 568 590;ID=match$826_568_590;Name=SM00355;status=T;Dbxref="InterPro:IPR013087"
g2988.t1_1	SMART	protein_match	540	562	0.014	+	.	date=18-12-2020;Target=g2988.t1_1 540 562;ID=match$826_540_562;Name=SM00355;status=T;Dbxref="InterPro:IPR013087"
g2988.t1_1	Gene3D	protein_match	537	573	1.5E-11	+	.	date=18-12-2020;Target=g2988.t1_1 537 573;ID=match$827_537_573;Name=G3DSA:3.30.160.60;status=T
g2988.t1_1	ProSitePatterns	protein_match	570	590	.	+	.	date=18-12-2020;Target=g2988.t1_1 570 590;ID=match$828_570_590;signature_desc=Zinc finger C2H2 type domain signature.;Name=PS00028;status=T;Dbxref="InterPro:IPR013087"
g2988.t1_1	SUPERFAMILY	protein_match	523	577	2.23E-14	+	.	date=18-12-2020;Target=g2988.t1_1 523 577;ID=match$829_523_577;Name=SSF57667;status=T;Dbxref="InterPro:IPR036236"
g2988.t1_1	ProSiteProfiles	protein_match	568	595	11.822	+	.	date=18-12-2020;Target=g2988.t1_1 568 595;ID=match$830_568_595;signature_desc=Zinc finger C2H2 type domain profile.;Name=PS50157;status=T;Dbxref="InterPro:IPR013087"
g2988.t1_1	ProSiteProfiles	protein_match	512	539	11.884	+	.	date=18-12-2020;Target=g2988.t1_1 512 539;ID=match$831_512_539;signature_desc=Zinc finger C2H2 type domain profile.;Name=PS50157;status=T;Dbxref="InterPro:IPR013087"
g2988.t1_1	ProSitePatterns	protein_match	485	506	.	+	.	date=18-12-2020;Target=g2988.t1_1 485 506;ID=match$832_485_506;signature_desc=Zinc finger C2H2 type domain signature.;Name=PS00028;status=T;Dbxref="InterPro:IPR013087"
g2988.t1_1	MobiDBLite	protein_match	381	473	.	+	.	date=18-12-2020;Target=g2988.t1_1 381 473;ID=match$833_381_473;signature_desc=consensus disorder prediction;Name=mobidb-lite;status=T
g2988.t1_1	MobiDBLite	protein_match	709	758	.	+	.	date=18-12-2020;Target=g2988.t1_1 709 758;ID=match$834_709_758;signature_desc=consensus disorder prediction;Name=mobidb-lite;status=T
g2988.t1_1	ProSiteProfiles	protein_match	484	511	10.305	+	.	date=18-12-2020;Target=g2988.t1_1 484 511;ID=match$835_484_511;signature_desc=Zinc finger C2H2 type domain profile.;Name=PS50157;status=T;Dbxref="InterPro:IPR013087"
g2988.t1_1	ProSiteProfiles	protein_match	540	567	12.217	+	.	date=18-12-2020;Target=g2988.t1_1 540 567;ID=match$836_540_567;signature_desc=Zinc finger C2H2 type domain profile.;Name=PS50157;status=T;Dbxref="InterPro:IPR013087"
g12848.t1_1	.	polypeptide	1	490	.	+	.	ID=g12848.t1_1;md5=025ffc8d66d266721902ddb4d9151413
g12848.t1_1	PANTHER	protein_match	1	488	1.2E-296	+	.	date=18-12-2020;Target=g12848.t1_1 1 488;ID=match$837_1_488;Name=PTHR22255:SF1;status=T
g12848.t1_1	PANTHER	protein_match	1	488	1.2E-296	+	.	date=18-12-2020;Target=g12848.t1_1 1 488;ID=match$838_1_488;Name=PTHR22255;status=T
g7465.t1_1	.	polypeptide	1	827	.	+	.	ID=g7465.t1_1;md5=b79b4ae0cfb625d3bb1d70afcff5ecf5
g7465.t1_1	MobiDBLite	protein_match	759	800	.	+	.	date=18-12-2020;Target=g7465.t1_1 759 800;ID=match$839_759_800;signature_desc=consensus disorder prediction;Name=mobidb-lite;status=T
g7465.t1_1	MobiDBLite	protein_match	776	800	.	+	.	date=18-12-2020;Target=g7465.t1_1 776 800;ID=match$840_776_800;signature_desc=consensus disorder prediction;Name=mobidb-lite;status=T
g7465.t1_1	Pfam	protein_match	157	417	2.4E-43	+	.	date=18-12-2020;Target=g7465.t1_1 157 417;Ontology_term="GO:0004930","GO:0007186","GO:0016021";ID=match$841_157_417;signature_desc=7 transmembrane receptor (rhodopsin family);Name=PF00001;status=T;Dbxref="InterPro:IPR000276"
g7465.t1_1	ProSitePatterns	protein_match	226	242	.	+	.	date=18-12-2020;Target=g7465.t1_1 226 242;Ontology_term="GO:0004930","GO:0007186","GO:0016021";ID=match$842_226_242;signature_desc=G-protein coupled receptors family 1 signature.;Name=PS00237;status=T;Dbxref="InterPro:IPR000276"
g7465.t1_1	PANTHER	protein_match	562	650	1.3E-211	+	.	date=18-12-2020;Target=g7465.t1_1 562 650;ID=match$843_562_650;Name=PTHR24235;status=T
g7465.t1_1	PANTHER	protein_match	322	425	1.3E-211	+	.	date=18-12-2020;Target=g7465.t1_1 322 425;ID=match$843_322_425;Name=PTHR24235;status=T
g7465.t1_1	PANTHER	protein_match	425	531	1.3E-211	+	.	date=18-12-2020;Target=g7465.t1_1 425 531;ID=match$843_425_531;Name=PTHR24235;status=T
g7465.t1_1	ProSiteProfiles	protein_match	157	505	42.9	+	.	date=18-12-2020;Target=g7465.t1_1 157 505;Ontology_term="GO:0016021";ID=match$844_157_505;signature_desc=G-protein coupled receptors family 1 profile.;Name=PS50262;status=T;Dbxref="InterPro:IPR017452"
g7465.t1_1	PANTHER	protein_match	562	650	1.3E-211	+	.	date=18-12-2020;Target=g7465.t1_1 562 650;ID=match$845_562_650;Name=PTHR24235:SF29;status=T
g7465.t1_1	PANTHER	protein_match	322	425	1.3E-211	+	.	date=18-12-2020;Target=g7465.t1_1 322 425;ID=match$845_322_425;Name=PTHR24235:SF29;status=T
g7465.t1_1	PANTHER	protein_match	425	531	1.3E-211	+	.	date=18-12-2020;Target=g7465.t1_1 425 531;ID=match$845_425_531;Name=PTHR24235:SF29;status=T
g7465.t1_1	PRINTS	protein_match	220	242	7.3E-42	+	.	date=18-12-2020;Target=g7465.t1_1 220 242;Ontology_term="GO:0004930","GO:0007186","GO:0016021";ID=match$846_220_242;signature_desc=Rhodopsin-like GPCR superfamily signature;Name=PR00237;status=T;Dbxref="InterPro:IPR000276"
g7465.t1_1	PRINTS	protein_match	487	513	7.3E-42	+	.	date=18-12-2020;Target=g7465.t1_1 487 513;Ontology_term="GO:0004930","GO:0007186","GO:0016021";ID=match$846_487_513;signature_desc=Rhodopsin-like GPCR superfamily signature;Name=PR00237;status=T;Dbxref="InterPro:IPR000276"
g7465.t1_1	PRINTS	protein_match	390	414	7.3E-42	+	.	date=18-12-2020;Target=g7465.t1_1 390 414;Ontology_term="GO:0004930","GO:0007186","GO:0016021";ID=match$846_390_414;signature_desc=Rhodopsin-like GPCR superfamily signature;Name=PR00237;status=T;Dbxref="InterPro:IPR000276"
g7465.t1_1	PRINTS	protein_match	338	361	7.3E-42	+	.	date=18-12-2020;Target=g7465.t1_1 338 361;Ontology_term="GO:0004930","GO:0007186","GO:0016021";ID=match$846_338_361;signature_desc=Rhodopsin-like GPCR superfamily signature;Name=PR00237;status=T;Dbxref="InterPro:IPR000276"
g7465.t1_1	PRINTS	protein_match	175	196	7.3E-42	+	.	date=18-12-2020;Target=g7465.t1_1 175 196;Ontology_term="GO:0004930","GO:0007186","GO:0016021";ID=match$846_175_196;signature_desc=Rhodopsin-like GPCR superfamily signature;Name=PR00237;status=T;Dbxref="InterPro:IPR000276"
g7465.t1_1	PRINTS	protein_match	254	275	7.3E-42	+	.	date=18-12-2020;Target=g7465.t1_1 254 275;Ontology_term="GO:0004930","GO:0007186","GO:0016021";ID=match$846_254_275;signature_desc=Rhodopsin-like GPCR superfamily signature;Name=PR00237;status=T;Dbxref="InterPro:IPR000276"
g7465.t1_1	PRINTS	protein_match	142	166	7.3E-42	+	.	date=18-12-2020;Target=g7465.t1_1 142 166;Ontology_term="GO:0004930","GO:0007186","GO:0016021";ID=match$846_142_166;signature_desc=Rhodopsin-like GPCR superfamily signature;Name=PR00237;status=T;Dbxref="InterPro:IPR000276"
g7465.t1_1	PANTHER	protein_match	131	317	1.3E-211	+	.	date=18-12-2020;Target=g7465.t1_1 131 317;ID=match$847_131_317;Name=PTHR24235;status=T
g7465.t1_1	MobiDBLite	protein_match	609	664	.	+	.	date=18-12-2020;Target=g7465.t1_1 609 664;ID=match$848_609_664;signature_desc=consensus disorder prediction;Name=mobidb-lite;status=T
g7465.t1_1	CDD	protein_match	141	516	1.55766E-129	+	.	date=18-12-2020;Target=g7465.t1_1 141 516;ID=match$849_141_516;signature_desc=7tmA_NPYR-like;Name=cd15203;status=T
g7465.t1_1	Gene3D	protein_match	425	531	2.5E-27	+	.	date=18-12-2020;Target=g7465.t1_1 425 531;ID=match$850_425_531;Name=G3DSA:1.20.1070.10;status=T
g7465.t1_1	Gene3D	protein_match	130	424	2.9E-71	+	.	date=18-12-2020;Target=g7465.t1_1 130 424;ID=match$850_130_424;Name=G3DSA:1.20.1070.10;status=T
g7465.t1_1	PRINTS	protein_match	167	179	8.2E-17	+	.	date=18-12-2020;Target=g7465.t1_1 167 179;Ontology_term="GO:0004983","GO:0007186","GO:0016021";ID=match$851_167_179;signature_desc=Neuropeptide Y receptor signature;Name=PR01012;status=T;Dbxref="InterPro:IPR000611"
g7465.t1_1	PRINTS	protein_match	197	209	8.2E-17	+	.	date=18-12-2020;Target=g7465.t1_1 197 209;Ontology_term="GO:0004983","GO:0007186","GO:0016021";ID=match$851_197_209;signature_desc=Neuropeptide Y receptor signature;Name=PR01012;status=T;Dbxref="InterPro:IPR000611"
g7465.t1_1	PRINTS	protein_match	220	235	8.2E-17	+	.	date=18-12-2020;Target=g7465.t1_1 220 235;Ontology_term="GO:0004983","GO:0007186","GO:0016021";ID=match$851_220_235;signature_desc=Neuropeptide Y receptor signature;Name=PR01012;status=T;Dbxref="InterPro:IPR000611"
g7465.t1_1	PRINTS	protein_match	492	501	8.2E-17	+	.	date=18-12-2020;Target=g7465.t1_1 492 501;Ontology_term="GO:0004983","GO:0007186","GO:0016021";ID=match$851_492_501;signature_desc=Neuropeptide Y receptor signature;Name=PR01012;status=T;Dbxref="InterPro:IPR000611"
g7465.t1_1	PRINTS	protein_match	503	516	8.2E-17	+	.	date=18-12-2020;Target=g7465.t1_1 503 516;Ontology_term="GO:0004983","GO:0007186","GO:0016021";ID=match$851_503_516;signature_desc=Neuropeptide Y receptor signature;Name=PR01012;status=T;Dbxref="InterPro:IPR000611"
g7465.t1_1	SUPERFAMILY	protein_match	437	524	4.03E-20	+	.	date=18-12-2020;Target=g7465.t1_1 437 524;ID=match$852_437_524;Name=SSF81321;status=T
g7465.t1_1	SMART	protein_match	151	520	4.7E-6	+	.	date=18-12-2020;Target=g7465.t1_1 151 520;Ontology_term="GO:0004930","GO:0007186","GO:0016021";ID=match$853_151_520;Name=SM01381;status=T;Dbxref="InterPro:IPR000276"
g7465.t1_1	MobiDBLite	protein_match	593	667	.	+	.	date=18-12-2020;Target=g7465.t1_1 593 667;ID=match$854_593_667;signature_desc=consensus disorder prediction;Name=mobidb-lite;status=T
g7465.t1_1	Pfam	protein_match	432	505	1.4E-9	+	.	date=18-12-2020;Target=g7465.t1_1 432 505;Ontology_term="GO:0004930","GO:0007186","GO:0016021";ID=match$855_432_505;signature_desc=7 transmembrane receptor (rhodopsin family);Name=PF00001;status=T;Dbxref="InterPro:IPR000276"
g7465.t1_1	PANTHER	protein_match	131	317	1.3E-211	+	.	date=18-12-2020;Target=g7465.t1_1 131 317;ID=match$856_131_317;Name=PTHR24235:SF29;status=T
g7465.t1_1	SUPERFAMILY	protein_match	136	420	1.46E-53	+	.	date=18-12-2020;Target=g7465.t1_1 136 420;ID=match$857_136_420;Name=SSF81321;status=T
g8333.t1_1	.	polypeptide	1	464	.	+	.	ID=g8333.t1_1;md5=853f59a4451fc8b0e2960670fbdd3d0c
g8333.t1_1	PANTHER	protein_match	17	460	5.6E-179	+	.	date=18-12-2020;Target=g8333.t1_1 17 460;Ontology_term="GO:0016020";ID=match$858_17_460;Name=PTHR11923;status=T;Dbxref="InterPro:IPR002159"
g8333.t1_1	PANTHER	protein_match	17	460	5.6E-179	+	.	date=18-12-2020;Target=g8333.t1_1 17 460;ID=match$859_17_460;Name=PTHR11923:SF95;status=T
g8333.t1_1	Pfam	protein_match	21	458	5.8E-114	+	.	date=18-12-2020;Target=g8333.t1_1 21 458;Ontology_term="GO:0016020";ID=match$860_21_458;signature_desc=CD36 family;Name=PF01130;status=T;Dbxref="InterPro:IPR002159"
g8333.t1_1	PRINTS	protein_match	350	374	1.7E-31	+	.	date=18-12-2020;Target=g8333.t1_1 350 374;Ontology_term="GO:0016020";ID=match$861_350_374;signature_desc=Adhesion molecule CD36 family signature;Name=PR01609;status=T;Dbxref="InterPro:IPR002159"
g8333.t1_1	PRINTS	protein_match	61	82	1.7E-31	+	.	date=18-12-2020;Target=g8333.t1_1 61 82;Ontology_term="GO:0016020";ID=match$861_61_82;signature_desc=Adhesion molecule CD36 family signature;Name=PR01609;status=T;Dbxref="InterPro:IPR002159"
g8333.t1_1	PRINTS	protein_match	397	418	1.7E-31	+	.	date=18-12-2020;Target=g8333.t1_1 397 418;Ontology_term="GO:0016020";ID=match$861_397_418;signature_desc=Adhesion molecule CD36 family signature;Name=PR01609;status=T;Dbxref="InterPro:IPR002159"
g8333.t1_1	PRINTS	protein_match	87	99	1.7E-31	+	.	date=18-12-2020;Target=g8333.t1_1 87 99;Ontology_term="GO:0016020";ID=match$861_87_99;signature_desc=Adhesion molecule CD36 family signature;Name=PR01609;status=T;Dbxref="InterPro:IPR002159"
g8333.t1_1	PRINTS	protein_match	114	133	1.7E-31	+	.	date=18-12-2020;Target=g8333.t1_1 114 133;Ontology_term="GO:0016020";ID=match$861_114_133;signature_desc=Adhesion molecule CD36 family signature;Name=PR01609;status=T;Dbxref="InterPro:IPR002159"
g8333.t1_1	PRINTS	protein_match	267	291	1.7E-31	+	.	date=18-12-2020;Target=g8333.t1_1 267 291;Ontology_term="GO:0016020";ID=match$861_267_291;signature_desc=Adhesion molecule CD36 family signature;Name=PR01609;status=T;Dbxref="InterPro:IPR002159"
g6050.t1_1	.	polypeptide	1	204	.	+	.	ID=g6050.t1_1;md5=b57adf60c2261512fb0fce602f9af0be
g6050.t1_1	MobiDBLite	protein_match	1	61	.	+	.	date=18-12-2020;Target=g6050.t1_1 1 61;ID=match$862_1_61;signature_desc=consensus disorder prediction;Name=mobidb-lite;status=T
g6050.t1_1	MobiDBLite	protein_match	37	61	.	+	.	date=18-12-2020;Target=g6050.t1_1 37 61;ID=match$863_37_61;signature_desc=consensus disorder prediction;Name=mobidb-lite;status=T
g13089.t1_1	.	polypeptide	1	55	.	+	.	ID=g13089.t1_1;md5=50a2328492931dfbe906d78af11e1f3b
g13089.t1_1	PANTHER	protein_match	7	55	2.9E-13	+	.	date=18-12-2020;Target=g13089.t1_1 7 55;ID=match$864_7_55;Name=PTHR13923:SF23;status=T
g13089.t1_1	PANTHER	protein_match	7	55	2.9E-13	+	.	date=18-12-2020;Target=g13089.t1_1 7 55;Ontology_term="GO:0006888";ID=match$865_7_55;Name=PTHR13923;status=T;Dbxref="InterPro:IPR040251"
g13089.t1_1	Gene3D	protein_match	3	55	1.6E-9	+	.	date=18-12-2020;Target=g13089.t1_1 3 55;Ontology_term="GO:0005515";ID=match$866_3_55;Name=G3DSA:2.130.10.10;status=T;Dbxref="InterPro:IPR015943"
g16627.t1_1	.	polypeptide	1	410	.	+	.	ID=g16627.t1_1;md5=758ae35de4464ad02bb79c4fe1a097bc
g16627.t1_1	MobiDBLite	protein_match	205	252	.	+	.	date=18-12-2020;Target=g16627.t1_1 205 252;ID=match$867_205_252;signature_desc=consensus disorder prediction;Name=mobidb-lite;status=T
g16627.t1_1	MobiDBLite	protein_match	387	410	.	+	.	date=18-12-2020;Target=g16627.t1_1 387 410;ID=match$868_387_410;signature_desc=consensus disorder prediction;Name=mobidb-lite;status=T
g16627.t1_1	MobiDBLite	protein_match	94	121	.	+	.	date=18-12-2020;Target=g16627.t1_1 94 121;ID=match$869_94_121;signature_desc=consensus disorder prediction;Name=mobidb-lite;status=T
g16627.t1_1	MobiDBLite	protein_match	1	36	.	+	.	date=18-12-2020;Target=g16627.t1_1 1 36;ID=match$870_1_36;signature_desc=consensus disorder prediction;Name=mobidb-lite;status=T
g16627.t1_1	MobiDBLite	protein_match	71	123	.	+	.	date=18-12-2020;Target=g16627.t1_1 71 123;ID=match$871_71_123;signature_desc=consensus disorder prediction;Name=mobidb-lite;status=T
g6286.t1_1	.	polypeptide	1	590	.	+	.	ID=g6286.t1_1;md5=664c659156bc7564e6bd0906d3a87441
g6286.t1_1	PANTHER	protein_match	524	576	3.0E-16	+	.	date=18-12-2020;Target=g6286.t1_1 524 576;Ontology_term="GO:0000922","GO:0005813","GO:0005874","GO:0032467";ID=match$872_524_576;Name=PTHR21616;status=T;Dbxref="InterPro:IPR026708"
g6286.t1_1	MobiDBLite	protein_match	393	475	.	+	.	date=18-12-2020;Target=g6286.t1_1 393 475;ID=match$873_393_475;signature_desc=consensus disorder prediction;Name=mobidb-lite;status=T
g6286.t1_1	PANTHER	protein_match	124	309	3.0E-16	+	.	date=18-12-2020;Target=g6286.t1_1 124 309;ID=match$874_124_309;Name=PTHR21616:SF3;status=T
g6286.t1_1	MobiDBLite	protein_match	270	320	.	+	.	date=18-12-2020;Target=g6286.t1_1 270 320;ID=match$875_270_320;signature_desc=consensus disorder prediction;Name=mobidb-lite;status=T
g6286.t1_1	PANTHER	protein_match	124	309	3.0E-16	+	.	date=18-12-2020;Target=g6286.t1_1 124 309;Ontology_term="GO:0000922","GO:0005813","GO:0005874","GO:0032467";ID=match$876_124_309;Name=PTHR21616;status=T;Dbxref="InterPro:IPR026708"
g6286.t1_1	PANTHER	protein_match	524	576	3.0E-16	+	.	date=18-12-2020;Target=g6286.t1_1 524 576;ID=match$877_524_576;Name=PTHR21616:SF3;status=T
g6286.t1_1	MobiDBLite	protein_match	404	418	.	+	.	date=18-12-2020;Target=g6286.t1_1 404 418;ID=match$878_404_418;signature_desc=consensus disorder prediction;Name=mobidb-lite;status=T
g6286.t1_1	MobiDBLite	protein_match	432	465	.	+	.	date=18-12-2020;Target=g6286.t1_1 432 465;ID=match$879_432_465;signature_desc=consensus disorder prediction;Name=mobidb-lite;status=T
g6286.t1_1	MobiDBLite	protein_match	54	76	.	+	.	date=18-12-2020;Target=g6286.t1_1 54 76;ID=match$880_54_76;signature_desc=consensus disorder prediction;Name=mobidb-lite;status=T
g6286.t1_1	MobiDBLite	protein_match	45	86	.	+	.	date=18-12-2020;Target=g6286.t1_1 45 86;ID=match$881_45_86;signature_desc=consensus disorder prediction;Name=mobidb-lite;status=T
g2127.t1_1	.	polypeptide	1	47	.	+	.	ID=g2127.t1_1;md5=fd19c1856a0907983b62b8f972bd7a54
g2127.t1_1	PANTHER	protein_match	2	47	7.3E-16	+	.	date=18-12-2020;Target=g2127.t1_1 2 47;ID=match$882_2_47;Name=PTHR43038:SF5;status=T
g2127.t1_1	PANTHER	protein_match	2	47	7.3E-16	+	.	date=18-12-2020;Target=g2127.t1_1 2 47;ID=match$883_2_47;Name=PTHR43038;status=T
g9909.t1_1	.	polypeptide	1	173	.	+	.	ID=g9909.t1_1;md5=40fe58c47abd2b88de34986e57f785f2
g9909.t1_1	CDD	protein_match	6	159	3.94621E-92	+	.	date=18-12-2020;Target=g9909.t1_1 6 159;ID=match$884_6_159;signature_desc=PTP-IVa;Name=cd14500;status=T
g9909.t1_1	ProSiteProfiles	protein_match	83	149	15.395	+	.	date=18-12-2020;Target=g9909.t1_1 83 149;Ontology_term="GO:0016311","GO:0016791";ID=match$885_83_149;signature_desc=Tyrosine specific protein phosphatases family profile.;Name=PS50056;status=T;Dbxref="InterPro:IPR000387"
g9909.t1_1	SUPERFAMILY	protein_match	19	153	3.26E-34	+	.	date=18-12-2020;Target=g9909.t1_1 19 153;ID=match$886_19_153;Name=SSF52799;status=T;Dbxref="InterPro:IPR029021"
g9909.t1_1	PANTHER	protein_match	7	171	1.0E-67	+	.	date=18-12-2020;Target=g9909.t1_1 7 171;ID=match$887_7_171;Name=PTHR23339:SF100;status=T
g9909.t1_1	Pfam	protein_match	37	144	1.3E-5	+	.	date=18-12-2020;Target=g9909.t1_1 37 144;ID=match$888_37_144;signature_desc=Dual specificity phosphatase, catalytic domain;Name=PF00782;status=T
g9909.t1_1	PANTHER	protein_match	7	171	1.0E-67	+	.	date=18-12-2020;Target=g9909.t1_1 7 171;ID=match$889_7_171;Name=PTHR23339;status=T
g9909.t1_1	Gene3D	protein_match	2	170	2.9E-48	+	.	date=18-12-2020;Target=g9909.t1_1 2 170;ID=match$890_2_170;Name=G3DSA:3.90.190.10;status=T;Dbxref="InterPro:IPR029021"
g14773.t1_1	.	polypeptide	1	78	.	+	.	ID=g14773.t1_1;md5=4dbe25371de04b8a6a00d52c669e69ee
g14773.t1_1	MobiDBLite	protein_match	45	78	.	+	.	date=18-12-2020;Target=g14773.t1_1 45 78;ID=match$891_45_78;signature_desc=consensus disorder prediction;Name=mobidb-lite;status=T
g3573.t1_1	.	polypeptide	1	305	.	+	.	ID=g3573.t1_1;md5=b45e3b3bb9df2c30f00a104207bf7430
g3573.t1_1	Pfam	protein_match	26	292	5.3E-66	+	.	date=18-12-2020;Target=g3573.t1_1 26 292;Ontology_term="GO:0044237";ID=match$892_26_292;signature_desc=Initiation factor 2 subunit family;Name=PF01008;status=T;Dbxref="InterPro:IPR000649"
g3573.t1_1	Gene3D	protein_match	5	109	7.2E-28	+	.	date=18-12-2020;Target=g3573.t1_1 5 109;ID=match$893_5_109;Name=G3DSA:1.20.120.1070;status=T;Dbxref="InterPro:IPR042528"
g3573.t1_1	SUPERFAMILY	protein_match	7	303	7.18E-80	+	.	date=18-12-2020;Target=g3573.t1_1 7 303;ID=match$894_7_303;Name=SSF100950;status=T;Dbxref="InterPro:IPR037171"
g3573.t1_1	PANTHER	protein_match	6	304	6.2E-111	+	.	date=18-12-2020;Target=g3573.t1_1 6 304;ID=match$895_6_304;Name=PTHR45860;status=T
g3573.t1_1	Gene3D	protein_match	111	305	2.6E-77	+	.	date=18-12-2020;Target=g3573.t1_1 111 305;ID=match$896_111_305;Name=G3DSA:3.40.50.10470;status=T;Dbxref="InterPro:IPR042529"
g3573.t1_1	PANTHER	protein_match	6	304	6.2E-111	+	.	date=18-12-2020;Target=g3573.t1_1 6 304;ID=match$897_6_304;Name=PTHR45860:SF1;status=T
g13974.t1_1	.	polypeptide	1	406	.	+	.	ID=g13974.t1_1;md5=6b2d09f78b925983f0203d5fb6a11aa2
g13974.t1_1	PANTHER	protein_match	17	403	1.0E-213	+	.	date=18-12-2020;Target=g13974.t1_1 17 403;ID=match$898_17_403;Name=PTHR11964:SF11;status=T
g13974.t1_1	PANTHER	protein_match	17	403	1.0E-213	+	.	date=18-12-2020;Target=g13974.t1_1 17 403;Ontology_term="GO:0004478","GO:0005524","GO:0006556";ID=match$899_17_403;Name=PTHR11964;status=T;Dbxref="InterPro:IPR002133"
g13974.t1_1	ProSitePatterns	protein_match	287	295	.	+	.	date=18-12-2020;Target=g13974.t1_1 287 295;Ontology_term="GO:0004478","GO:0006556";ID=match$900_287_295;signature_desc=S-adenosylmethionine synthase signature 2.;Name=PS00377;status=T;Dbxref="InterPro:IPR022631"
g13974.t1_1	Pfam	protein_match	27	123	4.2E-41	+	.	date=18-12-2020;Target=g13974.t1_1 27 123;Ontology_term="GO:0004478","GO:0006556";ID=match$901_27_123;signature_desc=S-adenosylmethionine synthetase, N-terminal domain;Name=PF00438;status=T;Dbxref="InterPro:IPR022628"
g13974.t1_1	ProSitePatterns	protein_match	140	150	.	+	.	date=18-12-2020;Target=g13974.t1_1 140 150;Ontology_term="GO:0004478","GO:0006556";ID=match$902_140_150;signature_desc=S-adenosylmethionine synthase signature 1.;Name=PS00376;status=T;Dbxref="InterPro:IPR022631"
g13974.t1_1	Hamap	protein_match	25	404	49.083878	+	.	date=18-12-2020;Target=g13974.t1_1 25 404;Ontology_term="GO:0004478","GO:0005524","GO:0006556";ID=match$903_25_404;signature_desc=S-adenosylmethionine synthase [metK].;Name=MF_00086;status=T;Dbxref="InterPro:IPR002133"
g13974.t1_1	SUPERFAMILY	protein_match	137	260	3.39E-49	+	.	date=18-12-2020;Target=g13974.t1_1 137 260;Ontology_term="GO:0004478","GO:0006556";ID=match$904_137_260;Name=SSF55973;status=T;Dbxref="InterPro:IPR022636"
g13974.t1_1	Pfam	protein_match	139	259	5.4E-44	+	.	date=18-12-2020;Target=g13974.t1_1 139 259;Ontology_term="GO:0004478","GO:0006556";ID=match$905_139_259;signature_desc=S-adenosylmethionine synthetase, central domain;Name=PF02772;status=T;Dbxref="InterPro:IPR022629"
g13974.t1_1	CDD	protein_match	28	400	0.0	+	.	date=18-12-2020;Target=g13974.t1_1 28 400;ID=match$906_28_400;signature_desc=S-AdoMet_synt;Name=cd18079;status=T
g13974.t1_1	Pfam	protein_match	261	397	1.6E-66	+	.	date=18-12-2020;Target=g13974.t1_1 261 397;Ontology_term="GO:0004478","GO:0006556";ID=match$907_261_397;signature_desc=S-adenosylmethionine synthetase, C-terminal domain;Name=PF02773;status=T;Dbxref="InterPro:IPR022630"
g13974.t1_1	PIRSF	protein_match	21	405	1.3E-160	+	.	date=18-12-2020;Target=g13974.t1_1 21 405;Ontology_term="GO:0004478","GO:0005524","GO:0006556";ID=match$908_21_405;Name=PIRSF000497;status=T;Dbxref="InterPro:IPR002133"
g13974.t1_1	Gene3D	protein_match	28	263	1.3E-171	+	.	date=18-12-2020;Target=g13974.t1_1 28 263;ID=match$909_28_263;Name=G3DSA:3.30.300.10;status=T
g13974.t1_1	SUPERFAMILY	protein_match	26	133	9.81E-46	+	.	date=18-12-2020;Target=g13974.t1_1 26 133;Ontology_term="GO:0004478","GO:0006556";ID=match$910_26_133;Name=SSF55973;status=T;Dbxref="InterPro:IPR022636"
g13974.t1_1	TIGRFAM	protein_match	28	402	5.9E-176	+	.	date=18-12-2020;Target=g13974.t1_1 28 402;Ontology_term="GO:0004478","GO:0005524","GO:0006556";ID=match$911_28_402;signature_desc=metK: methionine adenosyltransferase;Name=TIGR01034;status=T;Dbxref="InterPro:IPR002133"
g13974.t1_1	Gene3D	protein_match	34	300	1.3E-171	+	.	date=18-12-2020;Target=g13974.t1_1 34 300;ID=match$912_34_300;Name=G3DSA:3.30.300.10;status=T
g13974.t1_1	SUPERFAMILY	protein_match	261	401	1.77E-65	+	.	date=18-12-2020;Target=g13974.t1_1 261 401;Ontology_term="GO:0004478","GO:0006556";ID=match$913_261_401;Name=SSF55973;status=T;Dbxref="InterPro:IPR022636"
g13974.t1_1	Gene3D	protein_match	138	397	1.3E-171	+	.	date=18-12-2020;Target=g13974.t1_1 138 397;ID=match$914_138_397;Name=G3DSA:3.30.300.10;status=T
g7658.t1_1	.	polypeptide	1	156	.	+	.	ID=g7658.t1_1;md5=744a49086cd792e186116d1bf7ec1876
g7658.t1_1	MobiDBLite	protein_match	76	114	.	+	.	date=18-12-2020;Target=g7658.t1_1 76 114;ID=match$915_76_114;signature_desc=consensus disorder prediction;Name=mobidb-lite;status=T
g7658.t1_1	PANTHER	protein_match	101	151	1.8E-17	+	.	date=18-12-2020;Target=g7658.t1_1 101 151;ID=match$916_101_151;Name=PTHR24064:SF187;status=T
g7658.t1_1	PANTHER	protein_match	101	151	1.8E-17	+	.	date=18-12-2020;Target=g7658.t1_1 101 151;ID=match$917_101_151;Name=PTHR24064;status=T
g4239.t1_1	.	polypeptide	1	913	.	+	.	ID=g4239.t1_1;md5=9b65d1cfb9cf7dc5ba37da2a33aa697b
g4239.t1_1	Pfam	protein_match	139	196	2.0E-13	+	.	date=18-12-2020;Target=g4239.t1_1 139 196;ID=match$918_139_196;signature_desc=Histone methyltransferase Tudor domain 1;Name=PF18359;status=T;Dbxref="InterPro:IPR041291"
g4239.t1_1	MobiDBLite	protein_match	337	371	.	+	.	date=18-12-2020;Target=g4239.t1_1 337 371;ID=match$919_337_371;signature_desc=consensus disorder prediction;Name=mobidb-lite;status=T
g4239.t1_1	Gene3D	protein_match	771	911	2.5E-20	+	.	date=18-12-2020;Target=g4239.t1_1 771 911;ID=match$920_771_911;Name=G3DSA:2.170.270.10;status=T
g4239.t1_1	SUPERFAMILY	protein_match	522	902	1.12E-66	+	.	date=18-12-2020;Target=g4239.t1_1 522 902;ID=match$921_522_902;Name=SSF82199;status=T
g4239.t1_1	PANTHER	protein_match	3	912	1.6E-250	+	.	date=18-12-2020;Target=g4239.t1_1 3 912;ID=match$922_3_912;Name=PTHR46024:SF1;status=T
g4239.t1_1	Gene3D	protein_match	518	747	1.3E-46	+	.	date=18-12-2020;Target=g4239.t1_1 518 747;ID=match$923_518_747;Name=G3DSA:2.170.270.10;status=T
g4239.t1_1	ProSiteProfiles	protein_match	449	517	11.856	+	.	date=18-12-2020;Target=g4239.t1_1 449 517;Ontology_term="GO:0003677";ID=match$924_449_517;signature_desc=Methyl-CpG-binding domain (MBD) profile.;Name=PS50982;status=T;Dbxref="InterPro:IPR001739"
g4239.t1_1	SUPERFAMILY	protein_match	451	521	5.89E-13	+	.	date=18-12-2020;Target=g4239.t1_1 451 521;Ontology_term="GO:0003677";ID=match$925_451_521;Name=SSF54171;status=T;Dbxref="InterPro:IPR016177"
g4239.t1_1	MobiDBLite	protein_match	722	744	.	+	.	date=18-12-2020;Target=g4239.t1_1 722 744;ID=match$926_722_744;signature_desc=consensus disorder prediction;Name=mobidb-lite;status=T
g4239.t1_1	ProSiteProfiles	protein_match	655	887	15.39	+	.	date=18-12-2020;Target=g4239.t1_1 655 887;Ontology_term="GO:0005515";ID=match$927_655_887;signature_desc=SET domain profile.;Name=PS50280;status=T;Dbxref="InterPro:IPR001214"
g4239.t1_1	SMART	protein_match	452	524	1.4E-4	+	.	date=18-12-2020;Target=g4239.t1_1 452 524;Ontology_term="GO:0003677";ID=match$928_452_524;Name=SM00391;status=T;Dbxref="InterPro:IPR001739"
g4239.t1_1	ProSiteProfiles	protein_match	579	652	10.456	+	.	date=18-12-2020;Target=g4239.t1_1 579 652;Ontology_term="GO:0005634","GO:0008270","GO:0018024","GO:0034968";ID=match$929_579_652;signature_desc=Pre-SET domain profile.;Name=PS50867;status=T;Dbxref="InterPro:IPR007728"
g4239.t1_1	MobiDBLite	protein_match	336	371	.	+	.	date=18-12-2020;Target=g4239.t1_1 336 371;ID=match$930_336_371;signature_desc=consensus disorder prediction;Name=mobidb-lite;status=T
g4239.t1_1	Pfam	protein_match	666	886	9.8E-20	+	.	date=18-12-2020;Target=g4239.t1_1 666 886;Ontology_term="GO:0005515";ID=match$931_666_886;signature_desc=SET domain;Name=PF00856;status=T;Dbxref="InterPro:IPR001214"
g4239.t1_1	MobiDBLite	protein_match	722	814	.	+	.	date=18-12-2020;Target=g4239.t1_1 722 814;ID=match$932_722_814;signature_desc=consensus disorder prediction;Name=mobidb-lite;status=T
g4239.t1_1	PANTHER	protein_match	3	912	1.6E-250	+	.	date=18-12-2020;Target=g4239.t1_1 3 912;ID=match$933_3_912;Name=PTHR46024;status=T
g4239.t1_1	Pfam	protein_match	535	647	1.6E-14	+	.	date=18-12-2020;Target=g4239.t1_1 535 647;Ontology_term="GO:0005634","GO:0008270","GO:0018024","GO:0034968";ID=match$934_535_647;signature_desc=Pre-SET motif;Name=PF05033;status=T;Dbxref="InterPro:IPR007728"
g4239.t1_1	Pfam	protein_match	458	516	6.0E-9	+	.	date=18-12-2020;Target=g4239.t1_1 458 516;Ontology_term="GO:0003677";ID=match$935_458_516;signature_desc=Methyl-CpG binding domain;Name=PF01429;status=T;Dbxref="InterPro:IPR001739"
g4239.t1_1	Gene3D	protein_match	234	292	1.6E-19	+	.	date=18-12-2020;Target=g4239.t1_1 234 292;ID=match$936_234_292;Name=G3DSA:2.30.30.140;status=T
g4239.t1_1	Pfam	protein_match	239	287	2.4E-16	+	.	date=18-12-2020;Target=g4239.t1_1 239 287;ID=match$937_239_287;signature_desc=Histone methyltransferase Tudor domain;Name=PF18358;status=T;Dbxref="InterPro:IPR041292"
g4239.t1_1	SMART	protein_match	531	638	3.3E-13	+	.	date=18-12-2020;Target=g4239.t1_1 531 638;Ontology_term="GO:0005634","GO:0008270","GO:0018024","GO:0034968";ID=match$938_531_638;Name=SM00468;status=T;Dbxref="InterPro:IPR007728"
g4239.t1_1	SMART	protein_match	655	893	8.0E-28	+	.	date=18-12-2020;Target=g4239.t1_1 655 893;Ontology_term="GO:0005515";ID=match$939_655_893;Name=SM00317;status=T;Dbxref="InterPro:IPR001214"
g4239.t1_1	CDD	protein_match	455	512	6.80066E-19	+	.	date=18-12-2020;Target=g4239.t1_1 455 512;ID=match$940_455_512;signature_desc=HMT_MBD;Name=cd01395;status=T
g4239.t1_1	Gene3D	protein_match	456	516	2.1E-6	+	.	date=18-12-2020;Target=g4239.t1_1 456 516;ID=match$941_456_516;Name=G3DSA:3.30.890.10;status=T
g4239.t1_1	CDD	protein_match	529	912	1.9272E-143	+	.	date=18-12-2020;Target=g4239.t1_1 529 912;ID=match$942_529_912;signature_desc=SET_SETDB1;Name=cd10517;status=T
g4239.t1_1	Gene3D	protein_match	128	231	7.6E-24	+	.	date=18-12-2020;Target=g4239.t1_1 128 231;ID=match$943_128_231;Name=G3DSA:2.30.30.140;status=T
g10562.t1_1	.	polypeptide	1	81	.	+	.	ID=g10562.t1_1;md5=caa55615b320e5415bcda63d5353a777
g10562.t1_1	PANTHER	protein_match	4	81	7.6E-14	+	.	date=18-12-2020;Target=g10562.t1_1 4 81;ID=match$944_4_81;Name=PTHR11223;status=T
g10562.t1_1	PANTHER	protein_match	4	81	7.6E-14	+	.	date=18-12-2020;Target=g10562.t1_1 4 81;Ontology_term="GO:0051168";ID=match$945_4_81;Name=PTHR11223:SF3;status=T;Dbxref="InterPro:IPR040018"
g10562.t1_1	Gene3D	protein_match	2	81	2.9E-25	+	.	date=18-12-2020;Target=g10562.t1_1 2 81;ID=match$946_2_81;Name=G3DSA:1.25.10.10;status=T;Dbxref="InterPro:IPR011989"
g7874.t1_1	.	polypeptide	1	270	.	+	.	ID=g7874.t1_1;md5=7505f86fc8fbdcd7efcff551ddd78f2e
g7874.t1_1	Gene3D	protein_match	1	51	4.4E-21	+	.	date=18-12-2020;Target=g7874.t1_1 1 51;ID=match$947_1_51;Name=G3DSA:1.10.132.30;status=T;Dbxref="InterPro:IPR038120"
g7874.t1_1	SUPERFAMILY	protein_match	167	242	2.49E-7	+	.	date=18-12-2020;Target=g7874.t1_1 167 242;ID=match$948_167_242;Name=SSF47095;status=T;Dbxref="InterPro:IPR036910"
g7874.t1_1	Pfam	protein_match	49	151	5.1E-33	+	.	date=18-12-2020;Target=g7874.t1_1 49 151;Ontology_term="GO:0003677","GO:0003899","GO:0006351";ID=match$949_49_151;signature_desc=RNA polymerase Rpb1, domain 5;Name=PF04998;status=T;Dbxref="InterPro:IPR007081"
g7874.t1_1	SUPERFAMILY	protein_match	1	175	3.43E-60	+	.	date=18-12-2020;Target=g7874.t1_1 1 175;ID=match$950_1_175;Name=SSF64484;status=T
g7874.t1_1	Gene3D	protein_match	89	126	4.3E-13	+	.	date=18-12-2020;Target=g7874.t1_1 89 126;ID=match$951_89_126;Name=G3DSA:2.20.25.410;status=T
g7874.t1_1	ProSiteProfiles	protein_match	180	242	9.74	+	.	date=18-12-2020;Target=g7874.t1_1 180 242;ID=match$952_180_242;signature_desc=HMG boxes A and B DNA-binding domains profile.;Name=PS50118;status=T;Dbxref="InterPro:IPR009071"
g7874.t1_1	Gene3D	protein_match	161	244	3.5E-7	+	.	date=18-12-2020;Target=g7874.t1_1 161 244;ID=match$953_161_244;Name=G3DSA:1.10.30.10;status=T;Dbxref="InterPro:IPR036910"
g7874.t1_1	PANTHER	protein_match	1	162	1.3E-75	+	.	date=18-12-2020;Target=g7874.t1_1 1 162;Ontology_term="GO:0003899","GO:0006351","GO:0008270";ID=match$954_1_162;Name=PTHR19376:SF11;status=T;Dbxref="InterPro:IPR015699"
g7874.t1_1	PANTHER	protein_match	1	162	1.3E-75	+	.	date=18-12-2020;Target=g7874.t1_1 1 162;ID=match$955_1_162;Name=PTHR19376;status=T
g7874.t1_1	Pfam	protein_match	1	42	1.0E-9	+	.	date=18-12-2020;Target=g7874.t1_1 1 42;Ontology_term="GO:0003677","GO:0003899","GO:0006351";ID=match$956_1_42;signature_desc=RNA polymerase Rpb1, domain 4;Name=PF05000;status=T;Dbxref="InterPro:IPR007083"
g17033.t1_1	.	polypeptide	1	87	.	+	.	ID=g17033.t1_1;md5=b298713eeda181108d2f56aaf1ed6df7
g17033.t1_1	Pfam	protein_match	2	87	1.7E-18	+	.	date=18-12-2020;Target=g17033.t1_1 2 87;Ontology_term="GO:0005230","GO:0006811","GO:0016021";ID=match$957_2_87;signature_desc=Neurotransmitter-gated ion-channel ligand binding domain;Name=PF02931;status=T;Dbxref="InterPro:IPR006202"
g17033.t1_1	Gene3D	protein_match	1	87	1.0E-33	+	.	date=18-12-2020;Target=g17033.t1_1 1 87;Ontology_term="GO:0005230","GO:0006811","GO:0016021";ID=match$958_1_87;Name=G3DSA:2.70.170.10;status=T;Dbxref="InterPro:IPR036734"
g17033.t1_1	PANTHER	protein_match	1	87	2.0E-39	+	.	date=18-12-2020;Target=g17033.t1_1 1 87;Ontology_term="GO:0004888","GO:0005216","GO:0016021","GO:0034220";ID=match$959_1_87;Name=PTHR18945;status=T;Dbxref="InterPro:IPR006201"
g17033.t1_1	PANTHER	protein_match	1	87	2.0E-39	+	.	date=18-12-2020;Target=g17033.t1_1 1 87;ID=match$960_1_87;Name=PTHR18945:SF493;status=T
g17033.t1_1	SUPERFAMILY	protein_match	2	87	4.58E-23	+	.	date=18-12-2020;Target=g17033.t1_1 2 87;Ontology_term="GO:0005230","GO:0006811","GO:0016021";ID=match$961_2_87;Name=SSF63712;status=T;Dbxref="InterPro:IPR036734"
g16939.t1_1	.	polypeptide	1	362	.	+	.	ID=g16939.t1_1;md5=4abbe5df2f5c8ba69b111ecd16cf87d8
g16939.t1_1	PANTHER	protein_match	80	357	1.7E-63	+	.	date=18-12-2020;Target=g16939.t1_1 80 357;ID=match$962_80_357;Name=PTHR43731;status=T
g16939.t1_1	PANTHER	protein_match	80	357	1.7E-63	+	.	date=18-12-2020;Target=g16939.t1_1 80 357;ID=match$963_80_357;Name=PTHR43731:SF14;status=T
g16939.t1_1	SUPERFAMILY	protein_match	160	339	9.94E-31	+	.	date=18-12-2020;Target=g16939.t1_1 160 339;ID=match$964_160_339;Name=SSF144091;status=T
g16939.t1_1	Pfam	protein_match	191	340	3.0E-27	+	.	date=18-12-2020;Target=g16939.t1_1 191 340;Ontology_term="GO:0004252","GO:0016021";ID=match$965_191_340;signature_desc=Rhomboid family;Name=PF01694;status=T;Dbxref="InterPro:IPR022764"
g16939.t1_1	Gene3D	protein_match	150	343	5.6E-23	+	.	date=18-12-2020;Target=g16939.t1_1 150 343;ID=match$966_150_343;Name=G3DSA:1.20.1540.10;status=T;Dbxref="InterPro:IPR035952"
g3764.t1_1	.	polypeptide	1	508	.	+	.	ID=g3764.t1_1;md5=4481a813ecb2cd680bf15dca0efabef3
g3764.t1_1	ProSitePatterns	protein_match	314	328	.	+	.	date=18-12-2020;Target=g3764.t1_1 314 328;Ontology_term="GO:0019346","GO:0030170";ID=match$967_314_328;signature_desc=Cys/Met metabolism enzymes pyridoxal-phosphate attachment site.;Name=PS00868;status=T;Dbxref="InterPro:IPR000277"
g3764.t1_1	PANTHER	protein_match	263	507	2.4E-209	+	.	date=18-12-2020;Target=g3764.t1_1 263 507;ID=match$968_263_507;Name=PTHR11808:SF15;status=T
g3764.t1_1	Pfam	protein_match	8	231	1.2E-81	+	.	date=18-12-2020;Target=g3764.t1_1 8 231;Ontology_term="GO:0019346","GO:0030170";ID=match$969_8_231;signature_desc=Cys/Met metabolism PLP-dependent enzyme;Name=PF01053;status=T;Dbxref="InterPro:IPR000277"
g3764.t1_1	Pfam	protein_match	263	504	1.7E-103	+	.	date=18-12-2020;Target=g3764.t1_1 263 504;Ontology_term="GO:0019346","GO:0030170";ID=match$969_263_504;signature_desc=Cys/Met metabolism PLP-dependent enzyme;Name=PF01053;status=T;Dbxref="InterPro:IPR000277"
g3764.t1_1	CDD	protein_match	25	505	6.42319E-179	+	.	date=18-12-2020;Target=g3764.t1_1 25 505;Ontology_term="GO:0019346","GO:0030170";ID=match$970_25_505;signature_desc=CGS_like;Name=cd00614;status=T;Dbxref="InterPro:IPR000277"
g3764.t1_1	SUPERFAMILY	protein_match	231	506	4.03E-90	+	.	date=18-12-2020;Target=g3764.t1_1 231 506;ID=match$971_231_506;Name=SSF53383;status=T;Dbxref="InterPro:IPR015424"
g3764.t1_1	Gene3D	protein_match	6	233	2.0E-83	+	.	date=18-12-2020;Target=g3764.t1_1 6 233;Ontology_term="GO:0003824";ID=match$972_6_233;Name=G3DSA:3.40.640.10;status=T;Dbxref="InterPro:IPR015421"
g3764.t1_1	Gene3D	protein_match	373	508	2.7E-57	+	.	date=18-12-2020;Target=g3764.t1_1 373 508;Ontology_term="GO:0003824";ID=match$973_373_508;Name=G3DSA:3.90.1150.10;status=T;Dbxref="InterPro:IPR015422"
g3764.t1_1	PANTHER	protein_match	263	507	2.4E-209	+	.	date=18-12-2020;Target=g3764.t1_1 263 507;Ontology_term="GO:0019346","GO:0030170";ID=match$974_263_507;Name=PTHR11808;status=T;Dbxref="InterPro:IPR000277"
g3764.t1_1	PANTHER	protein_match	5	231	2.4E-209	+	.	date=18-12-2020;Target=g3764.t1_1 5 231;Ontology_term="GO:0019346","GO:0030170";ID=match$975_5_231;Name=PTHR11808;status=T;Dbxref="InterPro:IPR000277"
g3764.t1_1	SUPERFAMILY	protein_match	6	244	9.04E-60	+	.	date=18-12-2020;Target=g3764.t1_1 6 244;ID=match$976_6_244;Name=SSF53383;status=T;Dbxref="InterPro:IPR015424"
g3764.t1_1	ProSitePatterns	protein_match	193	207	.	+	.	date=18-12-2020;Target=g3764.t1_1 193 207;Ontology_term="GO:0019346","GO:0030170";ID=match$977_193_207;signature_desc=Cys/Met metabolism enzymes pyridoxal-phosphate attachment site.;Name=PS00868;status=T;Dbxref="InterPro:IPR000277"
g3764.t1_1	Gene3D	protein_match	262	372	5.1E-45	+	.	date=18-12-2020;Target=g3764.t1_1 262 372;Ontology_term="GO:0003824";ID=match$978_262_372;Name=G3DSA:3.40.640.10;status=T;Dbxref="InterPro:IPR015421"
g3764.t1_1	PANTHER	protein_match	5	231	2.4E-209	+	.	date=18-12-2020;Target=g3764.t1_1 5 231;ID=match$979_5_231;Name=PTHR11808:SF15;status=T
g1313.t1_1	.	polypeptide	1	88	.	+	.	ID=g1313.t1_1;md5=ec5bb207a9dc5727cf567c576d2f3f05
g1313.t1_1	Gene3D	protein_match	1	26	2.2E-5	+	.	date=18-12-2020;Target=g1313.t1_1 1 26;ID=match$980_1_26;Name=G3DSA:3.40.50.1440;status=T;Dbxref="InterPro:IPR036525"
g1313.t1_1	SUPERFAMILY	protein_match	1	19	2.29E-5	+	.	date=18-12-2020;Target=g1313.t1_1 1 19;ID=match$981_1_19;Name=SSF52490;status=T;Dbxref="InterPro:IPR036525"
g1313.t1_1	ProSitePatterns	protein_match	1	4	.	+	.	date=18-12-2020;Target=g1313.t1_1 1 4;ID=match$982_1_4;signature_desc=Tubulin-beta mRNA autoregulation signal.;Name=PS00228;status=T;Dbxref="InterPro:IPR013838"
g17534.t1_1	.	polypeptide	1	117	.	+	.	ID=g17534.t1_1;md5=56fcbc88ce847f1f5a139ab0883cfaec
g17534.t1_1	Pfam	protein_match	22	94	4.7E-13	+	.	date=18-12-2020;Target=g17534.t1_1 22 94;ID=match$983_22_94;signature_desc=Macroglobulin domain MG3;Name=PF17791;status=T;Dbxref="InterPro:IPR041555"
g17534.t1_1	Gene3D	protein_match	26	117	3.7E-34	+	.	date=18-12-2020;Target=g17534.t1_1 26 117;ID=match$984_26_117;Name=G3DSA:2.60.40.1940;status=T
g7733.t1_1	.	polypeptide	1	83	.	+	.	ID=g7733.t1_1;md5=e78dc28c828dcb85d9beea047ff72fcb
g7733.t1_1	SUPERFAMILY	protein_match	1	68	2.16E-16	+	.	date=18-12-2020;Target=g7733.t1_1 1 68;ID=match$985_1_68;Name=SSF46966;status=T
g7733.t1_1	Pfam	protein_match	1	67	8.0E-13	+	.	date=18-12-2020;Target=g7733.t1_1 1 67;Ontology_term="GO:0005515";ID=match$986_1_67;signature_desc=Spectrin repeat;Name=PF00435;status=T;Dbxref="InterPro:IPR002017"
g7733.t1_1	PANTHER	protein_match	1	83	3.4E-25	+	.	date=18-12-2020;Target=g7733.t1_1 1 83;ID=match$987_1_83;Name=PTHR23167:SF64;status=T
g7733.t1_1	CDD	protein_match	1	83	2.30656E-12	+	.	date=18-12-2020;Target=g7733.t1_1 1 83;ID=match$988_1_83;signature_desc=SPEC;Name=cd00176;status=T
g7733.t1_1	PANTHER	protein_match	1	83	3.4E-25	+	.	date=18-12-2020;Target=g7733.t1_1 1 83;ID=match$989_1_83;Name=PTHR23167;status=T
g7733.t1_1	Gene3D	protein_match	1	83	1.4E-20	+	.	date=18-12-2020;Target=g7733.t1_1 1 83;ID=match$990_1_83;Name=G3DSA:1.20.58.1940;status=T
g12202.t1_1	.	polypeptide	1	118	.	+	.	ID=g12202.t1_1;md5=a3c1bd97639112a788e49708ed694812
g12202.t1_1	Gene3D	protein_match	21	107	1.2E-14	+	.	date=18-12-2020;Target=g12202.t1_1 21 107;ID=match$991_21_107;Name=G3DSA:2.20.25.240;status=T
g12202.t1_1	Pfam	protein_match	33	94	3.6E-15	+	.	date=18-12-2020;Target=g12202.t1_1 33 94;ID=match$992_33_94;signature_desc=FLYWCH zinc finger domain;Name=PF04500;status=T;Dbxref="InterPro:IPR007588"
g10096.t1_1	.	polypeptide	1	694	.	+	.	ID=g10096.t1_1;md5=80f8f63676a0e354a6c375e5c94cae9f
g10096.t1_1	SUPERFAMILY	protein_match	280	370	2.89E-19	+	.	date=18-12-2020;Target=g10096.t1_1 280 370;ID=match$993_280_370;Name=SSF54236;status=T;Dbxref="InterPro:IPR029071"
g10096.t1_1	CDD	protein_match	282	366	9.56461E-21	+	.	date=18-12-2020;Target=g10096.t1_1 282 366;ID=match$994_282_366;signature_desc=RA;Name=cd17043;status=T
g10096.t1_1	MobiDBLite	protein_match	520	597	.	+	.	date=18-12-2020;Target=g10096.t1_1 520 597;ID=match$995_520_597;signature_desc=consensus disorder prediction;Name=mobidb-lite;status=T
g10096.t1_1	Gene3D	protein_match	165	278	1.3E-17	+	.	date=18-12-2020;Target=g10096.t1_1 165 278;ID=match$996_165_278;Name=G3DSA:3.10.20.90;status=T
g10096.t1_1	MobiDBLite	protein_match	1	36	.	+	.	date=18-12-2020;Target=g10096.t1_1 1 36;ID=match$997_1_36;signature_desc=consensus disorder prediction;Name=mobidb-lite;status=T
g10096.t1_1	MobiDBLite	protein_match	103	126	.	+	.	date=18-12-2020;Target=g10096.t1_1 103 126;ID=match$998_103_126;signature_desc=consensus disorder prediction;Name=mobidb-lite;status=T
g10096.t1_1	Pfam	protein_match	281	370	2.2E-13	+	.	date=18-12-2020;Target=g10096.t1_1 281 370;Ontology_term="GO:0007165";ID=match$999_281_370;signature_desc=Ras association (RalGDS/AF-6) domain;Name=PF00788;status=T;Dbxref="InterPro:IPR000159"
g10096.t1_1	Pfam	protein_match	186	279	4.0E-13	+	.	date=18-12-2020;Target=g10096.t1_1 186 279;Ontology_term="GO:0007165";ID=match$999_186_279;signature_desc=Ras association (RalGDS/AF-6) domain;Name=PF00788;status=T;Dbxref="InterPro:IPR000159"
g10096.t1_1	PANTHER	protein_match	138	693	2.9E-137	+	.	date=18-12-2020;Target=g10096.t1_1 138 693;ID=match$1000_138_693;Name=PTHR21298;status=T
g10096.t1_1	MobiDBLite	protein_match	520	552	.	+	.	date=18-12-2020;Target=g10096.t1_1 520 552;ID=match$1001_520_552;signature_desc=consensus disorder prediction;Name=mobidb-lite;status=T
g10096.t1_1	ProSiteProfiles	protein_match	279	371	27.516	+	.	date=18-12-2020;Target=g10096.t1_1 279 371;Ontology_term="GO:0007165";ID=match$1002_279_371;signature_desc=Ras-associating (RA) domain profile.;Name=PS50200;status=T;Dbxref="InterPro:IPR000159"
g10096.t1_1	Gene3D	protein_match	279	374	6.2E-15	+	.	date=18-12-2020;Target=g10096.t1_1 279 374;ID=match$1003_279_374;Name=G3DSA:3.10.20.90;status=T
g10096.t1_1	SMART	protein_match	185	280	3.1E-6	+	.	date=18-12-2020;Target=g10096.t1_1 185 280;Ontology_term="GO:0007165";ID=match$1004_185_280;Name=SM00314;status=T;Dbxref="InterPro:IPR000159"
g10096.t1_1	SMART	protein_match	281	371	2.3E-9	+	.	date=18-12-2020;Target=g10096.t1_1 281 371;Ontology_term="GO:0007165";ID=match$1004_281_371;Name=SM00314;status=T;Dbxref="InterPro:IPR000159"
g10096.t1_1	MobiDBLite	protein_match	153	179	.	+	.	date=18-12-2020;Target=g10096.t1_1 153 179;ID=match$1005_153_179;signature_desc=consensus disorder prediction;Name=mobidb-lite;status=T
g10096.t1_1	MobiDBLite	protein_match	110	124	.	+	.	date=18-12-2020;Target=g10096.t1_1 110 124;ID=match$1006_110_124;signature_desc=consensus disorder prediction;Name=mobidb-lite;status=T
g10096.t1_1	ProSiteProfiles	protein_match	185	278	14.399	+	.	date=18-12-2020;Target=g10096.t1_1 185 278;Ontology_term="GO:0007165";ID=match$1007_185_278;signature_desc=Ras-associating (RA) domain profile.;Name=PS50200;status=T;Dbxref="InterPro:IPR000159"
g10096.t1_1	SUPERFAMILY	protein_match	187	279	9.3E-16	+	.	date=18-12-2020;Target=g10096.t1_1 187 279;ID=match$1008_187_279;Name=SSF54236;status=T;Dbxref="InterPro:IPR029071"
g10096.t1_1	MobiDBLite	protein_match	579	597	.	+	.	date=18-12-2020;Target=g10096.t1_1 579 597;ID=match$1009_579_597;signature_desc=consensus disorder prediction;Name=mobidb-lite;status=T
g2681.t1_1	.	polypeptide	1	175	.	+	.	ID=g2681.t1_1;md5=2ce4b05ab7fb9f4e42980c11266146bd
g2681.t1_1	Coils	protein_match	126	146	.	+	.	date=18-12-2020;Target=g2681.t1_1 126 146;ID=match$1010_126_146;Name=Coil;status=T
g6281.t1_1	.	polypeptide	1	235	.	+	.	ID=g6281.t1_1;md5=f79d2b81eba4c059a9ef76f88f28a01d
g6281.t1_1	MobiDBLite	protein_match	1	20	.	+	.	date=18-12-2020;Target=g6281.t1_1 1 20;ID=match$1011_1_20;signature_desc=consensus disorder prediction;Name=mobidb-lite;status=T
g15264.t1_1	.	polypeptide	1	444	.	+	.	ID=g15264.t1_1;md5=2120f9c0c2b385ecb145f15d21bca29d
g15264.t1_1	MobiDBLite	protein_match	406	433	.	+	.	date=18-12-2020;Target=g15264.t1_1 406 433;ID=match$1012_406_433;signature_desc=consensus disorder prediction;Name=mobidb-lite;status=T
g15264.t1_1	MobiDBLite	protein_match	181	206	.	+	.	date=18-12-2020;Target=g15264.t1_1 181 206;ID=match$1013_181_206;signature_desc=consensus disorder prediction;Name=mobidb-lite;status=T
g15264.t1_1	MobiDBLite	protein_match	160	210	.	+	.	date=18-12-2020;Target=g15264.t1_1 160 210;ID=match$1014_160_210;signature_desc=consensus disorder prediction;Name=mobidb-lite;status=T
g15264.t1_1	MobiDBLite	protein_match	388	444	.	+	.	date=18-12-2020;Target=g15264.t1_1 388 444;ID=match$1015_388_444;signature_desc=consensus disorder prediction;Name=mobidb-lite;status=T
g2036.t1_1	.	polypeptide	1	151	.	+	.	ID=g2036.t1_1;md5=8a557a56e1da4f5edd5913ab0b4ed4d7
g2036.t1_1	MobiDBLite	protein_match	79	104	.	+	.	date=18-12-2020;Target=g2036.t1_1 79 104;ID=match$1016_79_104;signature_desc=consensus disorder prediction;Name=mobidb-lite;status=T
g2036.t1_1	MobiDBLite	protein_match	82	104	.	+	.	date=18-12-2020;Target=g2036.t1_1 82 104;ID=match$1017_82_104;signature_desc=consensus disorder prediction;Name=mobidb-lite;status=T
g13231.t1_1	.	polypeptide	1	2343	.	+	.	ID=g13231.t1_1;md5=54eebfd739744c03d7219fb8a0d192da
g13231.t1_1	MobiDBLite	protein_match	2130	2151	.	+	.	date=18-12-2020;Target=g13231.t1_1 2130 2151;ID=match$1018_2130_2151;signature_desc=consensus disorder prediction;Name=mobidb-lite;status=T
g13231.t1_1	MobiDBLite	protein_match	781	825	.	+	.	date=18-12-2020;Target=g13231.t1_1 781 825;ID=match$1019_781_825;signature_desc=consensus disorder prediction;Name=mobidb-lite;status=T
g13231.t1_1	MobiDBLite	protein_match	563	577	.	+	.	date=18-12-2020;Target=g13231.t1_1 563 577;ID=match$1020_563_577;signature_desc=consensus disorder prediction;Name=mobidb-lite;status=T
g13231.t1_1	MobiDBLite	protein_match	300	334	.	+	.	date=18-12-2020;Target=g13231.t1_1 300 334;ID=match$1021_300_334;signature_desc=consensus disorder prediction;Name=mobidb-lite;status=T
g13231.t1_1	MobiDBLite	protein_match	797	811	.	+	.	date=18-12-2020;Target=g13231.t1_1 797 811;ID=match$1022_797_811;signature_desc=consensus disorder prediction;Name=mobidb-lite;status=T
g13231.t1_1	CDD	protein_match	1454	1517	3.29053E-24	+	.	date=18-12-2020;Target=g13231.t1_1 1454 1517;ID=match$1023_1454_1517;signature_desc=BACK_BTBD8;Name=cd18490;status=T;Dbxref="InterPro:IPR043225"
g13231.t1_1	MobiDBLite	protein_match	1981	2013	.	+	.	date=18-12-2020;Target=g13231.t1_1 1981 2013;ID=match$1024_1981_2013;signature_desc=consensus disorder prediction;Name=mobidb-lite;status=T
g13231.t1_1	MobiDBLite	protein_match	985	1000	.	+	.	date=18-12-2020;Target=g13231.t1_1 985 1000;ID=match$1025_985_1000;signature_desc=consensus disorder prediction;Name=mobidb-lite;status=T
g13231.t1_1	Gene3D	protein_match	1312	1485	3.8E-26	+	.	date=18-12-2020;Target=g13231.t1_1 1312 1485;ID=match$1026_1312_1485;Name=G3DSA:3.30.710.10;status=T
g13231.t1_1	ProSiteProfiles	protein_match	1345	1412	13.012	+	.	date=18-12-2020;Target=g13231.t1_1 1345 1412;Ontology_term="GO:0005515";ID=match$1027_1345_1412;signature_desc=BTB domain profile.;Name=PS50097;status=T;Dbxref="InterPro:IPR000210"
g13231.t1_1	MobiDBLite	protein_match	1	279	.	+	.	date=18-12-2020;Target=g13231.t1_1 1 279;ID=match$1028_1_279;signature_desc=consensus disorder prediction;Name=mobidb-lite;status=T
g13231.t1_1	MobiDBLite	protein_match	2164	2198	.	+	.	date=18-12-2020;Target=g13231.t1_1 2164 2198;ID=match$1029_2164_2198;signature_desc=consensus disorder prediction;Name=mobidb-lite;status=T
g13231.t1_1	MobiDBLite	protein_match	262	276	.	+	.	date=18-12-2020;Target=g13231.t1_1 262 276;ID=match$1030_262_276;signature_desc=consensus disorder prediction;Name=mobidb-lite;status=T
g13231.t1_1	MobiDBLite	protein_match	843	884	.	+	.	date=18-12-2020;Target=g13231.t1_1 843 884;ID=match$1031_843_884;signature_desc=consensus disorder prediction;Name=mobidb-lite;status=T
g13231.t1_1	MobiDBLite	protein_match	2070	2085	.	+	.	date=18-12-2020;Target=g13231.t1_1 2070 2085;ID=match$1032_2070_2085;signature_desc=consensus disorder prediction;Name=mobidb-lite;status=T
g13231.t1_1	MobiDBLite	protein_match	478	598	.	+	.	date=18-12-2020;Target=g13231.t1_1 478 598;ID=match$1033_478_598;signature_desc=consensus disorder prediction;Name=mobidb-lite;status=T
g13231.t1_1	MobiDBLite	protein_match	1939	1966	.	+	.	date=18-12-2020;Target=g13231.t1_1 1939 1966;ID=match$1034_1939_1966;signature_desc=consensus disorder prediction;Name=mobidb-lite;status=T
g13231.t1_1	MobiDBLite	protein_match	949	1030	.	+	.	date=18-12-2020;Target=g13231.t1_1 949 1030;ID=match$1035_949_1030;signature_desc=consensus disorder prediction;Name=mobidb-lite;status=T
g13231.t1_1	MobiDBLite	protein_match	1145	1183	.	+	.	date=18-12-2020;Target=g13231.t1_1 1145 1183;ID=match$1036_1145_1183;signature_desc=consensus disorder prediction;Name=mobidb-lite;status=T
g13231.t1_1	MobiDBLite	protein_match	2130	2198	.	+	.	date=18-12-2020;Target=g13231.t1_1 2130 2198;ID=match$1037_2130_2198;signature_desc=consensus disorder prediction;Name=mobidb-lite;status=T
g13231.t1_1	Coils	protein_match	1106	1126	.	+	.	date=18-12-2020;Target=g13231.t1_1 1106 1126;ID=match$1038_1106_1126;Name=Coil;status=T
g13231.t1_1	MobiDBLite	protein_match	1819	2013	.	+	.	date=18-12-2020;Target=g13231.t1_1 1819 2013;ID=match$1039_1819_2013;signature_desc=consensus disorder prediction;Name=mobidb-lite;status=T
g13231.t1_1	MobiDBLite	protein_match	1827	1844	.	+	.	date=18-12-2020;Target=g13231.t1_1 1827 1844;ID=match$1040_1827_1844;signature_desc=consensus disorder prediction;Name=mobidb-lite;status=T
g13231.t1_1	Coils	protein_match	2337	2342	.	+	.	date=18-12-2020;Target=g13231.t1_1 2337 2342;ID=match$1041_2337_2342;Name=Coil;status=T
g13231.t1_1	MobiDBLite	protein_match	721	758	.	+	.	date=18-12-2020;Target=g13231.t1_1 721 758;ID=match$1042_721_758;signature_desc=consensus disorder prediction;Name=mobidb-lite;status=T
g13231.t1_1	MobiDBLite	protein_match	301	334	.	+	.	date=18-12-2020;Target=g13231.t1_1 301 334;ID=match$1043_301_334;signature_desc=consensus disorder prediction;Name=mobidb-lite;status=T
g13231.t1_1	MobiDBLite	protein_match	845	875	.	+	.	date=18-12-2020;Target=g13231.t1_1 845 875;ID=match$1044_845_875;signature_desc=consensus disorder prediction;Name=mobidb-lite;status=T
g13231.t1_1	MobiDBLite	protein_match	2068	2099	.	+	.	date=18-12-2020;Target=g13231.t1_1 2068 2099;ID=match$1045_2068_2099;signature_desc=consensus disorder prediction;Name=mobidb-lite;status=T
g13231.t1_1	MobiDBLite	protein_match	500	562	.	+	.	date=18-12-2020;Target=g13231.t1_1 500 562;ID=match$1046_500_562;signature_desc=consensus disorder prediction;Name=mobidb-lite;status=T
g13231.t1_1	MobiDBLite	protein_match	612	649	.	+	.	date=18-12-2020;Target=g13231.t1_1 612 649;ID=match$1047_612_649;signature_desc=consensus disorder prediction;Name=mobidb-lite;status=T
g13231.t1_1	MobiDBLite	protein_match	724	746	.	+	.	date=18-12-2020;Target=g13231.t1_1 724 746;ID=match$1048_724_746;signature_desc=consensus disorder prediction;Name=mobidb-lite;status=T
g13231.t1_1	CDD	protein_match	1328	1448	2.32929E-54	+	.	date=18-12-2020;Target=g13231.t1_1 1328 1448;ID=match$1049_1328_1448;signature_desc=BTB2_POZ_BTBD8;Name=cd18286;status=T
g13231.t1_1	MobiDBLite	protein_match	2291	2343	.	+	.	date=18-12-2020;Target=g13231.t1_1 2291 2343;ID=match$1050_2291_2343;signature_desc=consensus disorder prediction;Name=mobidb-lite;status=T
g13231.t1_1	MobiDBLite	protein_match	949	968	.	+	.	date=18-12-2020;Target=g13231.t1_1 949 968;ID=match$1051_949_968;signature_desc=consensus disorder prediction;Name=mobidb-lite;status=T
g13231.t1_1	PANTHER	protein_match	897	2341	0.0	+	.	date=18-12-2020;Target=g13231.t1_1 897 2341;ID=match$1052_897_2341;Name=PTHR22427;status=T
g13231.t1_1	SUPERFAMILY	protein_match	1327	1440	9.42E-19	+	.	date=18-12-2020;Target=g13231.t1_1 1327 1440;ID=match$1053_1327_1440;Name=SSF54695;status=T;Dbxref="InterPro:IPR011333"
g13231.t1_1	PANTHER	protein_match	897	2341	0.0	+	.	date=18-12-2020;Target=g13231.t1_1 897 2341;ID=match$1054_897_2341;Name=PTHR22427:SF7;status=T
g13231.t1_1	MobiDBLite	protein_match	1001	1030	.	+	.	date=18-12-2020;Target=g13231.t1_1 1001 1030;ID=match$1055_1001_1030;signature_desc=consensus disorder prediction;Name=mobidb-lite;status=T
g13231.t1_1	MobiDBLite	protein_match	46	64	.	+	.	date=18-12-2020;Target=g13231.t1_1 46 64;ID=match$1056_46_64;signature_desc=consensus disorder prediction;Name=mobidb-lite;status=T
g13231.t1_1	Pfam	protein_match	1337	1442	3.2E-11	+	.	date=18-12-2020;Target=g13231.t1_1 1337 1442;Ontology_term="GO:0005515";ID=match$1057_1337_1442;signature_desc=BTB/POZ domain;Name=PF00651;status=T;Dbxref="InterPro:IPR000210"
g13231.t1_1	SMART	protein_match	1345	1443	1.6E-13	+	.	date=18-12-2020;Target=g13231.t1_1 1345 1443;Ontology_term="GO:0005515";ID=match$1058_1345_1443;Name=SM00225;status=T;Dbxref="InterPro:IPR000210"
g13231.t1_1	MobiDBLite	protein_match	1873	1890	.	+	.	date=18-12-2020;Target=g13231.t1_1 1873 1890;ID=match$1059_1873_1890;signature_desc=consensus disorder prediction;Name=mobidb-lite;status=T
g13231.t1_1	MobiDBLite	protein_match	65	91	.	+	.	date=18-12-2020;Target=g13231.t1_1 65 91;ID=match$1060_65_91;signature_desc=consensus disorder prediction;Name=mobidb-lite;status=T
g13231.t1_1	MobiDBLite	protein_match	1	20	.	+	.	date=18-12-2020;Target=g13231.t1_1 1 20;ID=match$1061_1_20;signature_desc=consensus disorder prediction;Name=mobidb-lite;status=T
g13231.t1_1	MobiDBLite	protein_match	193	214	.	+	.	date=18-12-2020;Target=g13231.t1_1 193 214;ID=match$1062_193_214;signature_desc=consensus disorder prediction;Name=mobidb-lite;status=T
g13231.t1_1	MobiDBLite	protein_match	126	147	.	+	.	date=18-12-2020;Target=g13231.t1_1 126 147;ID=match$1063_126_147;signature_desc=consensus disorder prediction;Name=mobidb-lite;status=T
g13231.t1_1	MobiDBLite	protein_match	94	120	.	+	.	date=18-12-2020;Target=g13231.t1_1 94 120;ID=match$1064_94_120;signature_desc=consensus disorder prediction;Name=mobidb-lite;status=T
g13231.t1_1	MobiDBLite	protein_match	215	234	.	+	.	date=18-12-2020;Target=g13231.t1_1 215 234;ID=match$1065_215_234;signature_desc=consensus disorder prediction;Name=mobidb-lite;status=T
g13231.t1_1	MobiDBLite	protein_match	2220	2276	.	+	.	date=18-12-2020;Target=g13231.t1_1 2220 2276;ID=match$1066_2220_2276;signature_desc=consensus disorder prediction;Name=mobidb-lite;status=T
g17768.t1_1	.	polypeptide	1	219	.	+	.	ID=g17768.t1_1;md5=bb3f5c3cc96a67f7020e2c96bfc4274a
g17768.t1_1	PANTHER	protein_match	25	218	2.0E-81	+	.	date=18-12-2020;Target=g17768.t1_1 25 218;ID=match$1067_25_218;Name=PTHR12757:SF1;status=T
g17768.t1_1	PANTHER	protein_match	25	218	2.0E-81	+	.	date=18-12-2020;Target=g17768.t1_1 25 218;Ontology_term="GO:0042981";ID=match$1068_25_218;Name=PTHR12757;status=T;Dbxref="InterPro:IPR008477"
g17768.t1_1	Gene3D	protein_match	33	218	1.4E-75	+	.	date=18-12-2020;Target=g17768.t1_1 33 218;ID=match$1069_33_218;Name=G3DSA:1.20.1440.160;status=T;Dbxref="InterPro:IPR038355"
g17768.t1_1	Pfam	protein_match	36	216	1.5E-71	+	.	date=18-12-2020;Target=g17768.t1_1 36 216;Ontology_term="GO:0042981";ID=match$1070_36_216;signature_desc=Domain of unknown function (DUF758);Name=PF05527;status=T;Dbxref="InterPro:IPR008477"
g617.t1_1	.	polypeptide	1	2978	.	+	.	ID=g617.t1_1;md5=cf20b2dfe07fa5e95339f71228136a17
g617.t1_1	MobiDBLite	protein_match	2016	2036	.	+	.	date=18-12-2020;Target=g617.t1_1 2016 2036;ID=match$1071_2016_2036;signature_desc=consensus disorder prediction;Name=mobidb-lite;status=T
g617.t1_1	MobiDBLite	protein_match	921	943	.	+	.	date=18-12-2020;Target=g617.t1_1 921 943;ID=match$1072_921_943;signature_desc=consensus disorder prediction;Name=mobidb-lite;status=T
g617.t1_1	PANTHER	protein_match	463	2781	0.0	+	.	date=18-12-2020;Target=g617.t1_1 463 2781;ID=match$1073_463_2781;Name=PTHR45685:SF1;status=T
g617.t1_1	MobiDBLite	protein_match	2897	2912	.	+	.	date=18-12-2020;Target=g617.t1_1 2897 2912;ID=match$1074_2897_2912;signature_desc=consensus disorder prediction;Name=mobidb-lite;status=T
g617.t1_1	MobiDBLite	protein_match	2746	2779	.	+	.	date=18-12-2020;Target=g617.t1_1 2746 2779;ID=match$1075_2746_2779;signature_desc=consensus disorder prediction;Name=mobidb-lite;status=T
g617.t1_1	MobiDBLite	protein_match	675	719	.	+	.	date=18-12-2020;Target=g617.t1_1 675 719;ID=match$1076_675_719;signature_desc=consensus disorder prediction;Name=mobidb-lite;status=T
g617.t1_1	MobiDBLite	protein_match	632	647	.	+	.	date=18-12-2020;Target=g617.t1_1 632 647;ID=match$1077_632_647;signature_desc=consensus disorder prediction;Name=mobidb-lite;status=T
g617.t1_1	MobiDBLite	protein_match	2879	2978	.	+	.	date=18-12-2020;Target=g617.t1_1 2879 2978;ID=match$1078_2879_2978;signature_desc=consensus disorder prediction;Name=mobidb-lite;status=T
g617.t1_1	MobiDBLite	protein_match	373	393	.	+	.	date=18-12-2020;Target=g617.t1_1 373 393;ID=match$1079_373_393;signature_desc=consensus disorder prediction;Name=mobidb-lite;status=T
g617.t1_1	Coils	protein_match	772	799	.	+	.	date=18-12-2020;Target=g617.t1_1 772 799;ID=match$1080_772_799;Name=Coil;status=T
g617.t1_1	MobiDBLite	protein_match	2168	2189	.	+	.	date=18-12-2020;Target=g617.t1_1 2168 2189;ID=match$1081_2168_2189;signature_desc=consensus disorder prediction;Name=mobidb-lite;status=T
g617.t1_1	MobiDBLite	protein_match	2223	2241	.	+	.	date=18-12-2020;Target=g617.t1_1 2223 2241;ID=match$1082_2223_2241;signature_desc=consensus disorder prediction;Name=mobidb-lite;status=T
g617.t1_1	SMART	protein_match	488	559	1.7E-29	+	.	date=18-12-2020;Target=g617.t1_1 488 559;ID=match$1083_488_559;Name=SM00573;status=T;Dbxref="InterPro:IPR014012"
g617.t1_1	MobiDBLite	protein_match	363	466	.	+	.	date=18-12-2020;Target=g617.t1_1 363 466;ID=match$1084_363_466;signature_desc=consensus disorder prediction;Name=mobidb-lite;status=T
g617.t1_1	MobiDBLite	protein_match	2371	2402	.	+	.	date=18-12-2020;Target=g617.t1_1 2371 2402;ID=match$1085_2371_2402;signature_desc=consensus disorder prediction;Name=mobidb-lite;status=T
g617.t1_1	Coils	protein_match	817	844	.	+	.	date=18-12-2020;Target=g617.t1_1 817 844;ID=match$1086_817_844;Name=Coil;status=T
g617.t1_1	SMART	protein_match	979	1171	3.4E-34	+	.	date=18-12-2020;Target=g617.t1_1 979 1171;ID=match$1087_979_1171;Name=SM00487;status=T;Dbxref="InterPro:IPR014001"
g617.t1_1	MobiDBLite	protein_match	753	768	.	+	.	date=18-12-2020;Target=g617.t1_1 753 768;ID=match$1088_753_768;signature_desc=consensus disorder prediction;Name=mobidb-lite;status=T
g617.t1_1	PANTHER	protein_match	463	2781	0.0	+	.	date=18-12-2020;Target=g617.t1_1 463 2781;ID=match$1089_463_2781;Name=PTHR45685;status=T
g617.t1_1	MobiDBLite	protein_match	2726	2745	.	+	.	date=18-12-2020;Target=g617.t1_1 2726 2745;ID=match$1090_2726_2745;signature_desc=consensus disorder prediction;Name=mobidb-lite;status=T
g617.t1_1	MobiDBLite	protein_match	2599	2617	.	+	.	date=18-12-2020;Target=g617.t1_1 2599 2617;ID=match$1091_2599_2617;signature_desc=consensus disorder prediction;Name=mobidb-lite;status=T
g617.t1_1	ProSiteProfiles	protein_match	1822	1972	18.894	+	.	date=18-12-2020;Target=g617.t1_1 1822 1972;ID=match$1092_1822_1972;signature_desc=Superfamilies 1 and 2 helicase C-terminal domain profile.;Name=PS51194;status=T;Dbxref="InterPro:IPR001650"
g617.t1_1	MobiDBLite	protein_match	2665	2712	.	+	.	date=18-12-2020;Target=g617.t1_1 2665 2712;ID=match$1093_2665_2712;signature_desc=consensus disorder prediction;Name=mobidb-lite;status=T
g617.t1_1	MobiDBLite	protein_match	2879	2896	.	+	.	date=18-12-2020;Target=g617.t1_1 2879 2896;ID=match$1094_2879_2896;signature_desc=consensus disorder prediction;Name=mobidb-lite;status=T
g617.t1_1	ProSiteProfiles	protein_match	487	559	22.576	+	.	date=18-12-2020;Target=g617.t1_1 487 559;ID=match$1095_487_559;signature_desc=HSA domain profile.;Name=PS51204;status=T;Dbxref="InterPro:IPR014012"
g617.t1_1	MobiDBLite	protein_match	29	65	.	+	.	date=18-12-2020;Target=g617.t1_1 29 65;ID=match$1096_29_65;signature_desc=consensus disorder prediction;Name=mobidb-lite;status=T
g617.t1_1	MobiDBLite	protein_match	77	115	.	+	.	date=18-12-2020;Target=g617.t1_1 77 115;ID=match$1097_77_115;signature_desc=consensus disorder prediction;Name=mobidb-lite;status=T
g617.t1_1	MobiDBLite	protein_match	818	839	.	+	.	date=18-12-2020;Target=g617.t1_1 818 839;ID=match$1098_818_839;signature_desc=consensus disorder prediction;Name=mobidb-lite;status=T
g617.t1_1	CDD	protein_match	1810	1942	5.23509E-63	+	.	date=18-12-2020;Target=g617.t1_1 1810 1942;ID=match$1099_1810_1942;signature_desc=SF2_C_SNF;Name=cd18793;status=T
g617.t1_1	Gene3D	protein_match	1779	2021	3.8E-78	+	.	date=18-12-2020;Target=g617.t1_1 1779 2021;ID=match$1100_1779_2021;Name=G3DSA:3.40.50.300;status=T
g617.t1_1	MobiDBLite	protein_match	769	791	.	+	.	date=18-12-2020;Target=g617.t1_1 769 791;ID=match$1101_769_791;signature_desc=consensus disorder prediction;Name=mobidb-lite;status=T
g617.t1_1	MobiDBLite	protein_match	2075	2108	.	+	.	date=18-12-2020;Target=g617.t1_1 2075 2108;ID=match$1102_2075_2108;signature_desc=consensus disorder prediction;Name=mobidb-lite;status=T
g617.t1_1	MobiDBLite	protein_match	2626	2643	.	+	.	date=18-12-2020;Target=g617.t1_1 2626 2643;ID=match$1103_2626_2643;signature_desc=consensus disorder prediction;Name=mobidb-lite;status=T
g617.t1_1	MobiDBLite	protein_match	239	278	.	+	.	date=18-12-2020;Target=g617.t1_1 239 278;ID=match$1104_239_278;signature_desc=consensus disorder prediction;Name=mobidb-lite;status=T
g617.t1_1	SUPERFAMILY	protein_match	1207	1272	1.17E-6	+	.	date=18-12-2020;Target=g617.t1_1 1207 1272;ID=match$1105_1207_1272;Name=SSF52540;status=T;Dbxref="InterPro:IPR027417"
g617.t1_1	MobiDBLite	protein_match	2432	2554	.	+	.	date=18-12-2020;Target=g617.t1_1 2432 2554;ID=match$1106_2432_2554;signature_desc=consensus disorder prediction;Name=mobidb-lite;status=T
g617.t1_1	MobiDBLite	protein_match	658	674	.	+	.	date=18-12-2020;Target=g617.t1_1 658 674;ID=match$1107_658_674;signature_desc=consensus disorder prediction;Name=mobidb-lite;status=T
g617.t1_1	MobiDBLite	protein_match	2953	2978	.	+	.	date=18-12-2020;Target=g617.t1_1 2953 2978;ID=match$1108_2953_2978;signature_desc=consensus disorder prediction;Name=mobidb-lite;status=T
g617.t1_1	Gene3D	protein_match	954	1231	3.5E-96	+	.	date=18-12-2020;Target=g617.t1_1 954 1231;ID=match$1109_954_1231;Name=G3DSA:3.40.50.10810;status=T;Dbxref="InterPro:IPR038718"
g617.t1_1	MobiDBLite	protein_match	2191	2208	.	+	.	date=18-12-2020;Target=g617.t1_1 2191 2208;ID=match$1110_2191_2208;signature_desc=consensus disorder prediction;Name=mobidb-lite;status=T
g617.t1_1	MobiDBLite	protein_match	2285	2314	.	+	.	date=18-12-2020;Target=g617.t1_1 2285 2314;ID=match$1111_2285_2314;signature_desc=consensus disorder prediction;Name=mobidb-lite;status=T
g617.t1_1	Coils	protein_match	1996	2016	.	+	.	date=18-12-2020;Target=g617.t1_1 1996 2016;ID=match$1112_1996_2016;Name=Coil;status=T
g617.t1_1	Pfam	protein_match	998	1272	7.4E-67	+	.	date=18-12-2020;Target=g617.t1_1 998 1272;Ontology_term="GO:0005524","GO:0070615";ID=match$1113_998_1272;signature_desc=SNF2 family N-terminal domain;Name=PF00176;status=T;Dbxref="InterPro:IPR000330"
g617.t1_1	MobiDBLite	protein_match	29	126	.	+	.	date=18-12-2020;Target=g617.t1_1 29 126;ID=match$1114_29_126;signature_desc=consensus disorder prediction;Name=mobidb-lite;status=T
g617.t1_1	MobiDBLite	protein_match	2010	2036	.	+	.	date=18-12-2020;Target=g617.t1_1 2010 2036;ID=match$1115_2010_2036;signature_desc=consensus disorder prediction;Name=mobidb-lite;status=T
g617.t1_1	MobiDBLite	protein_match	861	904	.	+	.	date=18-12-2020;Target=g617.t1_1 861 904;ID=match$1116_861_904;signature_desc=consensus disorder prediction;Name=mobidb-lite;status=T
g617.t1_1	SMART	protein_match	1848	1931	1.1E-24	+	.	date=18-12-2020;Target=g617.t1_1 1848 1931;ID=match$1117_1848_1931;Name=SM00490;status=T;Dbxref="InterPro:IPR001650"
g617.t1_1	Pfam	protein_match	1819	1931	8.1E-20	+	.	date=18-12-2020;Target=g617.t1_1 1819 1931;ID=match$1118_1819_1931;signature_desc=Helicase conserved C-terminal domain;Name=PF00271;status=T;Dbxref="InterPro:IPR001650"
g617.t1_1	MobiDBLite	protein_match	239	275	.	+	.	date=18-12-2020;Target=g617.t1_1 239 275;ID=match$1119_239_275;signature_desc=consensus disorder prediction;Name=mobidb-lite;status=T
g617.t1_1	MobiDBLite	protein_match	2345	2370	.	+	.	date=18-12-2020;Target=g617.t1_1 2345 2370;ID=match$1120_2345_2370;signature_desc=consensus disorder prediction;Name=mobidb-lite;status=T
g617.t1_1	MobiDBLite	protein_match	2337	2554	.	+	.	date=18-12-2020;Target=g617.t1_1 2337 2554;ID=match$1121_2337_2554;signature_desc=consensus disorder prediction;Name=mobidb-lite;status=T
g617.t1_1	CDD	protein_match	983	1205	1.66826E-167	+	.	date=18-12-2020;Target=g617.t1_1 983 1205;ID=match$1122_983_1205;signature_desc=DEXQc_SRCAP;Name=cd18003;status=T
g617.t1_1	MobiDBLite	protein_match	630	956	.	+	.	date=18-12-2020;Target=g617.t1_1 630 956;ID=match$1123_630_956;signature_desc=consensus disorder prediction;Name=mobidb-lite;status=T
g617.t1_1	SUPERFAMILY	protein_match	1103	1977	3.14E-63	+	.	date=18-12-2020;Target=g617.t1_1 1103 1977;ID=match$1124_1103_1977;Name=SSF52540;status=T;Dbxref="InterPro:IPR027417"
g617.t1_1	SUPERFAMILY	protein_match	969	1205	8.67E-64	+	.	date=18-12-2020;Target=g617.t1_1 969 1205;ID=match$1125_969_1205;Name=SSF52540;status=T;Dbxref="InterPro:IPR027417"
g617.t1_1	MobiDBLite	protein_match	406	466	.	+	.	date=18-12-2020;Target=g617.t1_1 406 466;ID=match$1126_406_466;signature_desc=consensus disorder prediction;Name=mobidb-lite;status=T
g617.t1_1	MobiDBLite	protein_match	2593	2795	.	+	.	date=18-12-2020;Target=g617.t1_1 2593 2795;ID=match$1127_2593_2795;signature_desc=consensus disorder prediction;Name=mobidb-lite;status=T
g617.t1_1	MobiDBLite	protein_match	2168	2270	.	+	.	date=18-12-2020;Target=g617.t1_1 2168 2270;ID=match$1128_2168_2270;signature_desc=consensus disorder prediction;Name=mobidb-lite;status=T
g617.t1_1	ProSiteProfiles	protein_match	995	1160	26.045	+	.	date=18-12-2020;Target=g617.t1_1 995 1160;ID=match$1129_995_1160;signature_desc=Superfamilies 1 and 2 helicase ATP-binding type-1 domain profile.;Name=PS51192;status=T;Dbxref="InterPro:IPR014001"
g617.t1_1	Coils	protein_match	2142	2181	.	+	.	date=18-12-2020;Target=g617.t1_1 2142 2181;ID=match$1130_2142_2181;Name=Coil;status=T
g617.t1_1	MobiDBLite	protein_match	840	860	.	+	.	date=18-12-2020;Target=g617.t1_1 840 860;ID=match$1131_840_860;signature_desc=consensus disorder prediction;Name=mobidb-lite;status=T
g617.t1_1	Pfam	protein_match	491	558	1.3E-20	+	.	date=18-12-2020;Target=g617.t1_1 491 558;ID=match$1132_491_558;signature_desc=HSA;Name=PF07529;status=T;Dbxref="InterPro:IPR014012"
g16736.t1_1	.	polypeptide	1	102	.	+	.	ID=g16736.t1_1;md5=ac2033a1535aca724f6e30e2ba27667f
g16736.t1_1	PRINTS	protein_match	36	47	1.3E-9	+	.	date=18-12-2020;Target=g16736.t1_1 36 47;Ontology_term="GO:0042302";ID=match$1133_36_47;signature_desc=Insect cuticle protein signature;Name=PR00947;status=T;Dbxref="InterPro:IPR000618"
g16736.t1_1	PRINTS	protein_match	80	91	1.3E-9	+	.	date=18-12-2020;Target=g16736.t1_1 80 91;Ontology_term="GO:0042302";ID=match$1133_80_91;signature_desc=Insect cuticle protein signature;Name=PR00947;status=T;Dbxref="InterPro:IPR000618"
g16736.t1_1	PRINTS	protein_match	69	80	1.3E-9	+	.	date=18-12-2020;Target=g16736.t1_1 69 80;Ontology_term="GO:0042302";ID=match$1133_69_80;signature_desc=Insect cuticle protein signature;Name=PR00947;status=T;Dbxref="InterPro:IPR000618"
g16736.t1_1	ProSiteProfiles	protein_match	35	102	19.456	+	.	date=18-12-2020;Target=g16736.t1_1 35 102;Ontology_term="GO:0042302";ID=match$1134_35_102;signature_desc=Chitin-binding type R&R domain profile.;Name=PS51155;status=T;Dbxref="InterPro:IPR000618"
g16736.t1_1	Pfam	protein_match	38	94	9.4E-19	+	.	date=18-12-2020;Target=g16736.t1_1 38 94;Ontology_term="GO:0042302";ID=match$1135_38_94;signature_desc=Insect cuticle protein;Name=PF00379;status=T;Dbxref="InterPro:IPR000618"
g16736.t1_1	PANTHER	protein_match	1	96	4.8E-27	+	.	date=18-12-2020;Target=g16736.t1_1 1 96;ID=match$1136_1_96;Name=PTHR10380;status=T
g16736.t1_1	MobiDBLite	protein_match	43	73	.	+	.	date=18-12-2020;Target=g16736.t1_1 43 73;ID=match$1137_43_73;signature_desc=consensus disorder prediction;Name=mobidb-lite;status=T
g16736.t1_1	ProSitePatterns	protein_match	71	96	.	+	.	date=18-12-2020;Target=g16736.t1_1 71 96;ID=match$1138_71_96;signature_desc=Chitin-binding type R&R domain signature.;Name=PS00233;status=T;Dbxref="InterPro:IPR031311"
g16736.t1_1	PANTHER	protein_match	1	96	4.8E-27	+	.	date=18-12-2020;Target=g16736.t1_1 1 96;ID=match$1139_1_96;Name=PTHR10380:SF192;status=T
g16736.t1_1	MobiDBLite	protein_match	45	60	.	+	.	date=18-12-2020;Target=g16736.t1_1 45 60;ID=match$1140_45_60;signature_desc=consensus disorder prediction;Name=mobidb-lite;status=T
g956.t1_1	.	polypeptide	1	476	.	+	.	ID=g956.t1_1;md5=d2f746f7cfef9f09e9d3b5e6f03b4b7d
g956.t1_1	Pfam	protein_match	269	426	5.8E-54	+	.	date=18-12-2020;Target=g956.t1_1 269 426;Ontology_term="GO:0008270";ID=match$1172_269_426;signature_desc=ZPR1 zinc-finger domain;Name=PF03367;status=T;Dbxref="InterPro:IPR004457"
g956.t1_1	Pfam	protein_match	29	186	3.7E-55	+	.	date=18-12-2020;Target=g956.t1_1 29 186;Ontology_term="GO:0008270";ID=match$1172_29_186;signature_desc=ZPR1 zinc-finger domain;Name=PF03367;status=T;Dbxref="InterPro:IPR004457"
g956.t1_1	TIGRFAM	protein_match	31	213	9.9E-30	+	.	date=18-12-2020;Target=g956.t1_1 31 213;Ontology_term="GO:0008270";ID=match$1173_31_213;signature_desc=ZPR1_znf: ZPR1 zinc finger domain;Name=TIGR00310;status=T;Dbxref="InterPro:IPR004457"
g956.t1_1	TIGRFAM	protein_match	269	461	1.0E-42	+	.	date=18-12-2020;Target=g956.t1_1 269 461;Ontology_term="GO:0008270";ID=match$1173_269_461;signature_desc=ZPR1_znf: ZPR1 zinc finger domain;Name=TIGR00310;status=T;Dbxref="InterPro:IPR004457"
g956.t1_1	PANTHER	protein_match	1	466	6.0E-169	+	.	date=18-12-2020;Target=g956.t1_1 1 466;ID=match$1174_1_466;Name=PTHR10876;status=T;Dbxref="InterPro:IPR040141"
g956.t1_1	Gene3D	protein_match	314	455	2.6E-44	+	.	date=18-12-2020;Target=g956.t1_1 314 455;ID=match$1175_314_455;Name=G3DSA:2.60.120.1040;status=T;Dbxref="InterPro:IPR042451"
g956.t1_1	Gene3D	protein_match	75	214	7.2E-47	+	.	date=18-12-2020;Target=g956.t1_1 75 214;ID=match$1175_75_214;Name=G3DSA:2.60.120.1040;status=T;Dbxref="InterPro:IPR042451"
g956.t1_1	SMART	protein_match	29	187	1.5E-75	+	.	date=18-12-2020;Target=g956.t1_1 29 187;Ontology_term="GO:0008270";ID=match$1176_29_187;Name=SM00709;status=T;Dbxref="InterPro:IPR004457"
g956.t1_1	SMART	protein_match	268	427	2.9E-73	+	.	date=18-12-2020;Target=g956.t1_1 268 427;Ontology_term="GO:0008270";ID=match$1176_268_427;Name=SM00709;status=T;Dbxref="InterPro:IPR004457"
g956.t1_1	Gene3D	protein_match	262	312	4.1E-25	+	.	date=18-12-2020;Target=g956.t1_1 262 312;ID=match$1177_262_312;Name=G3DSA:2.20.25.420;status=T;Dbxref="InterPro:IPR042452"
g956.t1_1	Gene3D	protein_match	19	74	9.3E-26	+	.	date=18-12-2020;Target=g956.t1_1 19 74;ID=match$1178_19_74;Name=G3DSA:2.20.25.420;status=T;Dbxref="InterPro:IPR042452"
g1933.t1_1	.	polypeptide	1	362	.	+	.	ID=g1933.t1_1;md5=b2d437880b227e45a13a5d35161448c8
g1933.t1_1	PANTHER	protein_match	90	163	4.5E-56	+	.	date=18-12-2020;Target=g1933.t1_1 90 163;ID=match$1179_90_163;Name=PTHR24390;status=T
g1933.t1_1	SUPERFAMILY	protein_match	254	304	1.52E-12	+	.	date=18-12-2020;Target=g1933.t1_1 254 304;ID=match$1180_254_304;Name=SSF57667;status=T;Dbxref="InterPro:IPR036236"
g1933.t1_1	SMART	protein_match	170	193	0.56	+	.	date=18-12-2020;Target=g1933.t1_1 170 193;ID=match$1181_170_193;Name=SM00355;status=T;Dbxref="InterPro:IPR013087"
g1933.t1_1	SMART	protein_match	18	47	14.0	+	.	date=18-12-2020;Target=g1933.t1_1 18 47;ID=match$1181_18_47;Name=SM00355;status=T;Dbxref="InterPro:IPR013087"
g1933.t1_1	SMART	protein_match	53	75	8.1	+	.	date=18-12-2020;Target=g1933.t1_1 53 75;ID=match$1181_53_75;Name=SM00355;status=T;Dbxref="InterPro:IPR013087"
g1933.t1_1	SMART	protein_match	286	309	0.18	+	.	date=18-12-2020;Target=g1933.t1_1 286 309;ID=match$1181_286_309;Name=SM00355;status=T;Dbxref="InterPro:IPR013087"
g1933.t1_1	SMART	protein_match	113	136	0.066	+	.	date=18-12-2020;Target=g1933.t1_1 113 136;ID=match$1181_113_136;Name=SM00355;status=T;Dbxref="InterPro:IPR013087"
g1933.t1_1	SMART	protein_match	226	246	31.0	+	.	date=18-12-2020;Target=g1933.t1_1 226 246;ID=match$1181_226_246;Name=SM00355;status=T;Dbxref="InterPro:IPR013087"
g1933.t1_1	SMART	protein_match	200	220	16.0	+	.	date=18-12-2020;Target=g1933.t1_1 200 220;ID=match$1181_200_220;Name=SM00355;status=T;Dbxref="InterPro:IPR013087"
g1933.t1_1	SMART	protein_match	258	280	0.0012	+	.	date=18-12-2020;Target=g1933.t1_1 258 280;ID=match$1181_258_280;Name=SM00355;status=T;Dbxref="InterPro:IPR013087"
g1933.t1_1	SMART	protein_match	81	101	12.0	+	.	date=18-12-2020;Target=g1933.t1_1 81 101;ID=match$1181_81_101;Name=SM00355;status=T;Dbxref="InterPro:IPR013087"
g1933.t1_1	SMART	protein_match	141	163	6.8	+	.	date=18-12-2020;Target=g1933.t1_1 141 163;ID=match$1181_141_163;Name=SM00355;status=T;Dbxref="InterPro:IPR013087"
g1933.t1_1	Gene3D	protein_match	138	194	5.0E-8	+	.	date=18-12-2020;Target=g1933.t1_1 138 194;ID=match$1182_138_194;Name=G3DSA:3.30.160.60;status=T
g1933.t1_1	Gene3D	protein_match	78	137	2.4E-9	+	.	date=18-12-2020;Target=g1933.t1_1 78 137;ID=match$1182_78_137;Name=G3DSA:3.30.160.60;status=T
g1933.t1_1	Gene3D	protein_match	6	77	5.1E-6	+	.	date=18-12-2020;Target=g1933.t1_1 6 77;ID=match$1182_6_77;Name=G3DSA:3.30.160.60;status=T
g1933.t1_1	Gene3D	protein_match	195	251	1.1E-7	+	.	date=18-12-2020;Target=g1933.t1_1 195 251;ID=match$1182_195_251;Name=G3DSA:3.30.160.60;status=T
g1933.t1_1	ProSitePatterns	protein_match	115	136	.	+	.	date=18-12-2020;Target=g1933.t1_1 115 136;ID=match$1183_115_136;signature_desc=Zinc finger C2H2 type domain signature.;Name=PS00028;status=T;Dbxref="InterPro:IPR013087"
g1933.t1_1	ProSiteProfiles	protein_match	226	257	8.933	+	.	date=18-12-2020;Target=g1933.t1_1 226 257;ID=match$1184_226_257;signature_desc=Zinc finger C2H2 type domain profile.;Name=PS50157;status=T;Dbxref="InterPro:IPR013087"
g1933.t1_1	ProSitePatterns	protein_match	288	309	.	+	.	date=18-12-2020;Target=g1933.t1_1 288 309;ID=match$1185_288_309;signature_desc=Zinc finger C2H2 type domain signature.;Name=PS00028;status=T;Dbxref="InterPro:IPR013087"
g1933.t1_1	Gene3D	protein_match	252	322	3.3E-14	+	.	date=18-12-2020;Target=g1933.t1_1 252 322;ID=match$1186_252_322;Name=G3DSA:3.30.160.60;status=T
g1933.t1_1	SUPERFAMILY	protein_match	210	267	3.16E-9	+	.	date=18-12-2020;Target=g1933.t1_1 210 267;ID=match$1187_210_267;Name=SSF57667;status=T;Dbxref="InterPro:IPR036236"
g1933.t1_1	ProSiteProfiles	protein_match	286	314	10.18	+	.	date=18-12-2020;Target=g1933.t1_1 286 314;ID=match$1188_286_314;signature_desc=Zinc finger C2H2 type domain profile.;Name=PS50157;status=T;Dbxref="InterPro:IPR013087"
g1933.t1_1	ProSiteProfiles	protein_match	113	136	10.305	+	.	date=18-12-2020;Target=g1933.t1_1 113 136;ID=match$1189_113_136;signature_desc=Zinc finger C2H2 type domain profile.;Name=PS50157;status=T;Dbxref="InterPro:IPR013087"
g1933.t1_1	PANTHER	protein_match	19	96	4.5E-56	+	.	date=18-12-2020;Target=g1933.t1_1 19 96;ID=match$1190_19_96;Name=PTHR24390:SF164;status=T
g1933.t1_1	ProSiteProfiles	protein_match	170	198	10.554	+	.	date=18-12-2020;Target=g1933.t1_1 170 198;ID=match$1191_170_198;signature_desc=Zinc finger C2H2 type domain profile.;Name=PS50157;status=T;Dbxref="InterPro:IPR013087"
g1933.t1_1	ProSitePatterns	protein_match	172	193	.	+	.	date=18-12-2020;Target=g1933.t1_1 172 193;ID=match$1192_172_193;signature_desc=Zinc finger C2H2 type domain signature.;Name=PS00028;status=T;Dbxref="InterPro:IPR013087"
g1933.t1_1	PANTHER	protein_match	90	163	4.5E-56	+	.	date=18-12-2020;Target=g1933.t1_1 90 163;ID=match$1193_90_163;Name=PTHR24390:SF164;status=T
g1933.t1_1	SUPERFAMILY	protein_match	109	153	2.32E-10	+	.	date=18-12-2020;Target=g1933.t1_1 109 153;ID=match$1194_109_153;Name=SSF57667;status=T;Dbxref="InterPro:IPR036236"
g1933.t1_1	PANTHER	protein_match	155	316	4.5E-56	+	.	date=18-12-2020;Target=g1933.t1_1 155 316;ID=match$1195_155_316;Name=PTHR24390;status=T
g1933.t1_1	PANTHER	protein_match	19	96	4.5E-56	+	.	date=18-12-2020;Target=g1933.t1_1 19 96;ID=match$1196_19_96;Name=PTHR24390;status=T
g1933.t1_1	Pfam	protein_match	227	245	0.014	+	.	date=18-12-2020;Target=g1933.t1_1 227 245;ID=match$1197_227_245;signature_desc=Zinc finger, C2H2 type;Name=PF00096;status=T;Dbxref="InterPro:IPR013087"
g1933.t1_1	Pfam	protein_match	113	136	0.0047	+	.	date=18-12-2020;Target=g1933.t1_1 113 136;ID=match$1197_113_136;signature_desc=Zinc finger, C2H2 type;Name=PF00096;status=T;Dbxref="InterPro:IPR013087"
g1933.t1_1	ProSiteProfiles	protein_match	258	285	11.261	+	.	date=18-12-2020;Target=g1933.t1_1 258 285;ID=match$1198_258_285;signature_desc=Zinc finger C2H2 type domain profile.;Name=PS50157;status=T;Dbxref="InterPro:IPR013087"
g1933.t1_1	ProSitePatterns	protein_match	55	75	.	+	.	date=18-12-2020;Target=g1933.t1_1 55 75;ID=match$1199_55_75;signature_desc=Zinc finger C2H2 type domain signature.;Name=PS00028;status=T;Dbxref="InterPro:IPR013087"
g1933.t1_1	ProSitePatterns	protein_match	260	280	.	+	.	date=18-12-2020;Target=g1933.t1_1 260 280;ID=match$1200_260_280;signature_desc=Zinc finger C2H2 type domain signature.;Name=PS00028;status=T;Dbxref="InterPro:IPR013087"
g1933.t1_1	SUPERFAMILY	protein_match	33	88	9.23E-5	+	.	date=18-12-2020;Target=g1933.t1_1 33 88;ID=match$1201_33_88;Name=SSF57667;status=T;Dbxref="InterPro:IPR036236"
g1933.t1_1	SUPERFAMILY	protein_match	139	193	2.5E-6	+	.	date=18-12-2020;Target=g1933.t1_1 139 193;ID=match$1202_139_193;Name=SSF57667;status=T;Dbxref="InterPro:IPR036236"
g1933.t1_1	PANTHER	protein_match	155	316	4.5E-56	+	.	date=18-12-2020;Target=g1933.t1_1 155 316;ID=match$1203_155_316;Name=PTHR24390:SF164;status=T
g6222.t1_1	.	polypeptide	1	1391	.	+	.	ID=g6222.t1_1;md5=9f8e7f6acda81c6793f6e157437cda8e
g6222.t1_1	MobiDBLite	protein_match	1279	1296	.	+	.	date=18-12-2020;Target=g6222.t1_1 1279 1296;ID=match$1204_1279_1296;signature_desc=consensus disorder prediction;Name=mobidb-lite;status=T
g6222.t1_1	ProSiteProfiles	protein_match	99	210	10.353	+	.	date=18-12-2020;Target=g6222.t1_1 99 210;ID=match$1205_99_210;signature_desc=Ig-like domain profile.;Name=PS50835;status=T;Dbxref="InterPro:IPR007110"
g6222.t1_1	MobiDBLite	protein_match	1100	1143	.	+	.	date=18-12-2020;Target=g6222.t1_1 1100 1143;ID=match$1206_1100_1143;signature_desc=consensus disorder prediction;Name=mobidb-lite;status=T
g6222.t1_1	MobiDBLite	protein_match	1341	1361	.	+	.	date=18-12-2020;Target=g6222.t1_1 1341 1361;ID=match$1207_1341_1361;signature_desc=consensus disorder prediction;Name=mobidb-lite;status=T
g6222.t1_1	Gene3D	protein_match	108	216	1.5E-9	+	.	date=18-12-2020;Target=g6222.t1_1 108 216;ID=match$1208_108_216;Name=G3DSA:2.60.40.10;status=T;Dbxref="InterPro:IPR013783"
g6222.t1_1	PANTHER	protein_match	850	976	1.1E-68	+	.	date=18-12-2020;Target=g6222.t1_1 850 976;ID=match$1209_850_976;Name=PTHR10075:SF78;status=T
g6222.t1_1	Gene3D	protein_match	314	371	8.0E-8	+	.	date=18-12-2020;Target=g6222.t1_1 314 371;Ontology_term="GO:0004930","GO:0016020";ID=match$1210_314_371;Name=G3DSA:4.10.1240.10;status=T;Dbxref="InterPro:IPR036445"
g6222.t1_1	ProSiteProfiles	protein_match	290	374	10.827	+	.	date=18-12-2020;Target=g6222.t1_1 290 374;Ontology_term="GO:0004930","GO:0016020";ID=match$1211_290_374;signature_desc=G-protein coupled receptors family 2 profile 1.;Name=PS50227;status=T;Dbxref="InterPro:IPR001879"
g6222.t1_1	SUPERFAMILY	protein_match	214	317	1.21E-11	+	.	date=18-12-2020;Target=g6222.t1_1 214 317;ID=match$1212_214_317;Name=SSF48726;status=T;Dbxref="InterPro:IPR036179"
g6222.t1_1	SMART	protein_match	313	379	0.0083	+	.	date=18-12-2020;Target=g6222.t1_1 313 379;Ontology_term="GO:0004930","GO:0016020";ID=match$1213_313_379;Name=SM00008;status=T;Dbxref="InterPro:IPR001879"
g6222.t1_1	ProSiteProfiles	protein_match	215	307	10.753	+	.	date=18-12-2020;Target=g6222.t1_1 215 307;ID=match$1214_215_307;signature_desc=Ig-like domain profile.;Name=PS50835;status=T;Dbxref="InterPro:IPR007110"
g6222.t1_1	PANTHER	protein_match	64	801	1.1E-68	+	.	date=18-12-2020;Target=g6222.t1_1 64 801;Ontology_term="GO:0005515","GO:0005886","GO:0007155","GO:0007411";ID=match$1215_64_801;Name=PTHR10075;status=T;Dbxref="InterPro:IPR043204"
g6222.t1_1	SMART	protein_match	221	309	1.8E-4	+	.	date=18-12-2020;Target=g6222.t1_1 221 309;ID=match$1216_221_309;Name=SM00409;status=T;Dbxref="InterPro:IPR003599"
g6222.t1_1	SMART	protein_match	119	212	0.0016	+	.	date=18-12-2020;Target=g6222.t1_1 119 212;ID=match$1216_119_212;Name=SM00409;status=T;Dbxref="InterPro:IPR003599"
g6222.t1_1	CDD	protein_match	250	305	8.66502E-4	+	.	date=18-12-2020;Target=g6222.t1_1 250 305;ID=match$1217_250_305;signature_desc=Ig;Name=cd00096;status=T
g6222.t1_1	PANTHER	protein_match	64	801	1.1E-68	+	.	date=18-12-2020;Target=g6222.t1_1 64 801;ID=match$1218_64_801;Name=PTHR10075:SF78;status=T
g6222.t1_1	SUPERFAMILY	protein_match	124	197	6.43E-11	+	.	date=18-12-2020;Target=g6222.t1_1 124 197;ID=match$1219_124_197;Name=SSF48726;status=T;Dbxref="InterPro:IPR036179"
g6222.t1_1	MobiDBLite	protein_match	1224	1270	.	+	.	date=18-12-2020;Target=g6222.t1_1 1224 1270;ID=match$1220_1224_1270;signature_desc=consensus disorder prediction;Name=mobidb-lite;status=T
g6222.t1_1	MobiDBLite	protein_match	1199	1296	.	+	.	date=18-12-2020;Target=g6222.t1_1 1199 1296;ID=match$1221_1199_1296;signature_desc=consensus disorder prediction;Name=mobidb-lite;status=T
g6222.t1_1	Pfam	protein_match	124	196	3.4E-7	+	.	date=18-12-2020;Target=g6222.t1_1 124 196;ID=match$1222_124_196;signature_desc=Immunoglobulin domain;Name=PF13927;status=T
g6222.t1_1	MobiDBLite	protein_match	1199	1217	.	+	.	date=18-12-2020;Target=g6222.t1_1 1199 1217;ID=match$1223_1199_1217;signature_desc=consensus disorder prediction;Name=mobidb-lite;status=T
g6222.t1_1	MobiDBLite	protein_match	1100	1135	.	+	.	date=18-12-2020;Target=g6222.t1_1 1100 1135;ID=match$1224_1100_1135;signature_desc=consensus disorder prediction;Name=mobidb-lite;status=T
g6222.t1_1	Gene3D	protein_match	217	313	1.8E-9	+	.	date=18-12-2020;Target=g6222.t1_1 217 313;ID=match$1225_217_313;Name=G3DSA:2.60.40.10;status=T;Dbxref="InterPro:IPR013783"
g6222.t1_1	PANTHER	protein_match	850	976	1.1E-68	+	.	date=18-12-2020;Target=g6222.t1_1 850 976;Ontology_term="GO:0005515","GO:0005886","GO:0007155","GO:0007411";ID=match$1226_850_976;Name=PTHR10075;status=T;Dbxref="InterPro:IPR043204"
g7087.t1_1	.	polypeptide	1	1013	.	+	.	ID=g7087.t1_1;md5=46331b25e3345e718117aeefccef2884
g7087.t1_1	SMART	protein_match	386	580	3.7E-87	+	.	date=18-12-2020;Target=g7087.t1_1 386 580;Ontology_term="GO:0009190","GO:0035556";ID=match$1227_386_580;Name=SM00044;status=T;Dbxref="InterPro:IPR001054"
g7087.t1_1	SUPERFAMILY	protein_match	1	188	5.75E-49	+	.	date=18-12-2020;Target=g7087.t1_1 1 188;ID=match$1228_1_188;Name=SSF111126;status=T;Dbxref="InterPro:IPR024096"
g7087.t1_1	Pfam	protein_match	419	595	5.3E-67	+	.	date=18-12-2020;Target=g7087.t1_1 419 595;Ontology_term="GO:0009190","GO:0035556";ID=match$1229_419_595;signature_desc=Adenylate and Guanylate cyclase catalytic domain;Name=PF00211;status=T;Dbxref="InterPro:IPR001054"
g7087.t1_1	PANTHER	protein_match	2	615	0.0	+	.	date=18-12-2020;Target=g7087.t1_1 2 615;ID=match$1230_2_615;Name=PTHR45655:SF10;status=T
g7087.t1_1	MobiDBLite	protein_match	912	935	.	+	.	date=18-12-2020;Target=g7087.t1_1 912 935;ID=match$1231_912_935;signature_desc=consensus disorder prediction;Name=mobidb-lite;status=T
g7087.t1_1	Coils	protein_match	360	394	.	+	.	date=18-12-2020;Target=g7087.t1_1 360 394;ID=match$1232_360_394;Name=Coil;status=T
g7087.t1_1	Pfam	protein_match	202	407	9.7E-70	+	.	date=18-12-2020;Target=g7087.t1_1 202 407;Ontology_term="GO:0004383","GO:0006182";ID=match$1233_202_407;signature_desc=Heme NO binding associated;Name=PF07701;status=T;Dbxref="InterPro:IPR011645"
g7087.t1_1	Gene3D	protein_match	196	341	1.4E-27	+	.	date=18-12-2020;Target=g7087.t1_1 196 341;ID=match$1234_196_341;Name=G3DSA:3.30.450.260;status=T;Dbxref="InterPro:IPR042463"
g7087.t1_1	ProSitePatterns	protein_match	529	552	.	+	.	date=18-12-2020;Target=g7087.t1_1 529 552;Ontology_term="GO:0009190","GO:0016849","GO:0035556";ID=match$1235_529_552;signature_desc=Guanylate cyclase signature.;Name=PS00452;status=T;Dbxref="InterPro:IPR018297"
g7087.t1_1	Gene3D	protein_match	1	189	8.1E-59	+	.	date=18-12-2020;Target=g7087.t1_1 1 189;Ontology_term="GO:0020037";ID=match$1236_1_189;Name=G3DSA:3.90.1520.10;status=T;Dbxref="InterPro:IPR038158"
g7087.t1_1	Pfam	protein_match	2	163	2.9E-52	+	.	date=18-12-2020;Target=g7087.t1_1 2 163;Ontology_term="GO:0020037";ID=match$1237_2_163;signature_desc=Haem-NO-binding;Name=PF07700;status=T;Dbxref="InterPro:IPR011644"
g7087.t1_1	ProSiteProfiles	protein_match	424	552	48.562	+	.	date=18-12-2020;Target=g7087.t1_1 424 552;Ontology_term="GO:0009190","GO:0035556";ID=match$1238_424_552;signature_desc=Guanylate cyclase domain profile.;Name=PS50125;status=T;Dbxref="InterPro:IPR001054"
g7087.t1_1	CDD	protein_match	423	595	1.66962E-68	+	.	date=18-12-2020;Target=g7087.t1_1 423 595;Ontology_term="GO:0009190","GO:0035556";ID=match$1239_423_595;signature_desc=CHD;Name=cd07302;status=T;Dbxref="InterPro:IPR001054"
g7087.t1_1	Coils	protein_match	809	829	.	+	.	date=18-12-2020;Target=g7087.t1_1 809 829;ID=match$1240_809_829;Name=Coil;status=T
g7087.t1_1	SUPERFAMILY	protein_match	413	595	4.87E-62	+	.	date=18-12-2020;Target=g7087.t1_1 413 595;ID=match$1241_413_595;Name=SSF55073;status=T;Dbxref="InterPro:IPR029787"
g7087.t1_1	Gene3D	protein_match	415	598	9.1E-77	+	.	date=18-12-2020;Target=g7087.t1_1 415 598;ID=match$1242_415_598;Name=G3DSA:3.30.70.1230;status=T;Dbxref="InterPro:IPR029787"
g7087.t1_1	PANTHER	protein_match	2	615	0.0	+	.	date=18-12-2020;Target=g7087.t1_1 2 615;ID=match$1243_2_615;Name=PTHR45655;status=T
g8580.t1_1	.	polypeptide	1	562	.	+	.	ID=g8580.t1_1;md5=b33153cb61b2ec944fb280b799a8ddfa
g8580.t1_1	CDD	protein_match	26	498	5.07565E-80	+	.	date=18-12-2020;Target=g8580.t1_1 26 498;ID=match$1244_26_498;signature_desc=MFS_MFSD6;Name=cd17335;status=T
g8580.t1_1	Gene3D	protein_match	310	505	1.1E-37	+	.	date=18-12-2020;Target=g8580.t1_1 310 505;ID=match$1245_310_505;Name=G3DSA:1.20.1250.20;status=T
g8580.t1_1	Gene3D	protein_match	19	108	1.3E-10	+	.	date=18-12-2020;Target=g8580.t1_1 19 108;ID=match$1246_19_108;Name=G3DSA:1.20.1250.20;status=T
g8580.t1_1	PANTHER	protein_match	175	514	3.5E-198	+	.	date=18-12-2020;Target=g8580.t1_1 175 514;ID=match$1247_175_514;Name=PTHR16172:SF38;status=T
g8580.t1_1	PANTHER	protein_match	10	113	3.5E-198	+	.	date=18-12-2020;Target=g8580.t1_1 10 113;ID=match$1247_10_113;Name=PTHR16172:SF38;status=T
g8580.t1_1	SUPERFAMILY	protein_match	17	497	3.23E-44	+	.	date=18-12-2020;Target=g8580.t1_1 17 497;ID=match$1248_17_497;Name=SSF103473;status=T;Dbxref="InterPro:IPR036259"
g8580.t1_1	Pfam	protein_match	23	481	5.3E-108	+	.	date=18-12-2020;Target=g8580.t1_1 23 481;ID=match$1249_23_481;signature_desc=MFS_1 like family;Name=PF12832;status=T;Dbxref="InterPro:IPR024989"
g8580.t1_1	PANTHER	protein_match	175	514	3.5E-198	+	.	date=18-12-2020;Target=g8580.t1_1 175 514;ID=match$1250_175_514;Name=PTHR16172;status=T
g8580.t1_1	PANTHER	protein_match	10	113	3.5E-198	+	.	date=18-12-2020;Target=g8580.t1_1 10 113;ID=match$1250_10_113;Name=PTHR16172;status=T
g11058.t1_1	.	polypeptide	1	81	.	+	.	ID=g11058.t1_1;md5=1f5f127d785a3761a07f91308dda434e
g11058.t1_1	Coils	protein_match	79	80	.	+	.	date=18-12-2020;Target=g11058.t1_1 79 80;ID=match$1251_79_80;Name=Coil;status=T
g11058.t1_1	Coils	protein_match	62	63	.	+	.	date=18-12-2020;Target=g11058.t1_1 62 63;ID=match$1252_62_63;Name=Coil;status=T
g2120.t1_1	.	polypeptide	1	89	.	+	.	ID=g2120.t1_1;md5=eb02791876fed1d782bbae50d66924c2
g2120.t1_1	MobiDBLite	protein_match	66	89	.	+	.	date=18-12-2020;Target=g2120.t1_1 66 89;ID=match$1253_66_89;signature_desc=consensus disorder prediction;Name=mobidb-lite;status=T
g5836.t1_1	.	polypeptide	1	186	.	+	.	ID=g5836.t1_1;md5=ed3add538c7213765b47d5281b8af437
g5836.t1_1	PANTHER	protein_match	1	185	1.3E-116	+	.	date=18-12-2020;Target=g5836.t1_1 1 185;ID=match$1254_1_185;Name=PTHR45791;status=T
g5836.t1_1	ProSitePatterns	protein_match	112	124	.	+	.	date=18-12-2020;Target=g5836.t1_1 112 124;ID=match$1255_112_124;signature_desc=EF-hand calcium-binding domain.;Name=PS00018;status=T;Dbxref="InterPro:IPR018247"
g5836.t1_1	SUPERFAMILY	protein_match	1	184	1.48E-34	+	.	date=18-12-2020;Target=g5836.t1_1 1 184;ID=match$1256_1_184;Name=SSF47473;status=T;Dbxref="InterPro:IPR011992"
g5836.t1_1	Gene3D	protein_match	102	185	1.1E-19	+	.	date=18-12-2020;Target=g5836.t1_1 102 185;ID=match$1257_102_185;Name=G3DSA:1.10.238.10;status=T
g5836.t1_1	ProSiteProfiles	protein_match	68	97	7.846	+	.	date=18-12-2020;Target=g5836.t1_1 68 97;Ontology_term="GO:0005509";ID=match$1258_68_97;signature_desc=EF-hand calcium-binding domain profile.;Name=PS50222;status=T;Dbxref="InterPro:IPR002048"
g5836.t1_1	Pfam	protein_match	103	170	8.3E-10	+	.	date=18-12-2020;Target=g5836.t1_1 103 170;Ontology_term="GO:0005509";ID=match$1259_103_170;signature_desc=EF-hand domain pair;Name=PF13499;status=T;Dbxref="InterPro:IPR002048"
g5836.t1_1	ProSiteProfiles	protein_match	99	134	10.357	+	.	date=18-12-2020;Target=g5836.t1_1 99 134;Ontology_term="GO:0005509";ID=match$1260_99_134;signature_desc=EF-hand calcium-binding domain profile.;Name=PS50222;status=T;Dbxref="InterPro:IPR002048"
g5836.t1_1	CDD	protein_match	103	171	4.11229E-8	+	.	date=18-12-2020;Target=g5836.t1_1 103 171;Ontology_term="GO:0005509";ID=match$1261_103_171;signature_desc=EFh;Name=cd00051;status=T;Dbxref="InterPro:IPR002048"
g5836.t1_1	PANTHER	protein_match	1	185	1.3E-116	+	.	date=18-12-2020;Target=g5836.t1_1 1 185;ID=match$1262_1_185;Name=PTHR45791:SF8;status=T
g5836.t1_1	ProSiteProfiles	protein_match	142	177	9.604	+	.	date=18-12-2020;Target=g5836.t1_1 142 177;Ontology_term="GO:0005509";ID=match$1263_142_177;signature_desc=EF-hand calcium-binding domain profile.;Name=PS50222;status=T;Dbxref="InterPro:IPR002048"
g5836.t1_1	Gene3D	protein_match	9	99	3.9E-34	+	.	date=18-12-2020;Target=g5836.t1_1 9 99;ID=match$1264_9_99;Name=G3DSA:1.10.238.10;status=T
g5836.t1_1	ProSitePatterns	protein_match	155	167	.	+	.	date=18-12-2020;Target=g5836.t1_1 155 167;ID=match$1265_155_167;signature_desc=EF-hand calcium-binding domain.;Name=PS00018;status=T;Dbxref="InterPro:IPR018247"
g5836.t1_1	SMART	protein_match	146	174	1.1	+	.	date=18-12-2020;Target=g5836.t1_1 146 174;Ontology_term="GO:0005509";ID=match$1266_146_174;Name=SM00054;status=T;Dbxref="InterPro:IPR002048"
g5836.t1_1	SMART	protein_match	66	94	16.0	+	.	date=18-12-2020;Target=g5836.t1_1 66 94;Ontology_term="GO:0005509";ID=match$1266_66_94;Name=SM00054;status=T;Dbxref="InterPro:IPR002048"
g5836.t1_1	SMART	protein_match	103	131	0.2	+	.	date=18-12-2020;Target=g5836.t1_1 103 131;Ontology_term="GO:0005509";ID=match$1266_103_131;Name=SM00054;status=T;Dbxref="InterPro:IPR002048"
g9440.t1_1	.	polypeptide	1	70	.	+	.	ID=g9440.t1_1;md5=9145a27cb81dbe4bfbee545a3429e925
g9440.t1_1	MobiDBLite	protein_match	34	70	.	+	.	date=18-12-2020;Target=g9440.t1_1 34 70;ID=match$1267_34_70;signature_desc=consensus disorder prediction;Name=mobidb-lite;status=T
g9440.t1_1	MobiDBLite	protein_match	1	70	.	+	.	date=18-12-2020;Target=g9440.t1_1 1 70;ID=match$1268_1_70;signature_desc=consensus disorder prediction;Name=mobidb-lite;status=T
g7982.t1_1	.	polypeptide	1	127	.	+	.	ID=g7982.t1_1;md5=4d5bf47e8f32677f0701c6cc684edc5d
g7982.t1_1	MobiDBLite	protein_match	92	113	.	+	.	date=18-12-2020;Target=g7982.t1_1 92 113;ID=match$1269_92_113;signature_desc=consensus disorder prediction;Name=mobidb-lite;status=T
g7982.t1_1	MobiDBLite	protein_match	56	127	.	+	.	date=18-12-2020;Target=g7982.t1_1 56 127;ID=match$1270_56_127;signature_desc=consensus disorder prediction;Name=mobidb-lite;status=T
g7982.t1_1	MobiDBLite	protein_match	56	79	.	+	.	date=18-12-2020;Target=g7982.t1_1 56 79;ID=match$1271_56_79;signature_desc=consensus disorder prediction;Name=mobidb-lite;status=T
g11066.t1_1	.	polypeptide	1	123	.	+	.	ID=g11066.t1_1;md5=9411c57a5a685fd460ea60070dc9ee23
g11066.t1_1	Pfam	protein_match	10	74	1.4E-20	+	.	date=18-12-2020;Target=g11066.t1_1 10 74;ID=match$1272_10_74;signature_desc=DNA polymerases epsilon N terminal;Name=PF12213;status=T;Dbxref="InterPro:IPR024639"
g11066.t1_1	Gene3D	protein_match	5	75	3.5E-14	+	.	date=18-12-2020;Target=g11066.t1_1 5 75;ID=match$1273_5_75;Name=G3DSA:1.10.8.60;status=T
g13105.t1_1	.	polypeptide	1	255	.	+	.	ID=g13105.t1_1;md5=00c21de3c49428e3df46825bb4af2337
g13105.t1_1	Gene3D	protein_match	3	86	1.4E-32	+	.	date=18-12-2020;Target=g13105.t1_1 3 86;ID=match$1274_3_86;Name=G3DSA:1.10.30.10;status=T;Dbxref="InterPro:IPR036910"
g13105.t1_1	SMART	protein_match	14	86	2.1E-21	+	.	date=18-12-2020;Target=g13105.t1_1 14 86;ID=match$1275_14_86;Name=SM00398;status=T;Dbxref="InterPro:IPR009071"
g13105.t1_1	SMART	protein_match	106	176	5.1E-25	+	.	date=18-12-2020;Target=g13105.t1_1 106 176;ID=match$1275_106_176;Name=SM00398;status=T;Dbxref="InterPro:IPR009071"
g13105.t1_1	Gene3D	protein_match	93	178	5.6E-29	+	.	date=18-12-2020;Target=g13105.t1_1 93 178;ID=match$1276_93_178;Name=G3DSA:1.10.30.10;status=T;Dbxref="InterPro:IPR036910"
g13105.t1_1	PRINTS	protein_match	140	159	4.8E-25	+	.	date=18-12-2020;Target=g13105.t1_1 140 159;ID=match$1277_140_159;signature_desc=High mobility group (HMG1/HMG2) protein signature;Name=PR00886;status=T
g13105.t1_1	PRINTS	protein_match	46	68	4.8E-25	+	.	date=18-12-2020;Target=g13105.t1_1 46 68;ID=match$1277_46_68;signature_desc=High mobility group (HMG1/HMG2) protein signature;Name=PR00886;status=T
g13105.t1_1	PRINTS	protein_match	122	140	4.8E-25	+	.	date=18-12-2020;Target=g13105.t1_1 122 140;ID=match$1277_122_140;signature_desc=High mobility group (HMG1/HMG2) protein signature;Name=PR00886;status=T
g13105.t1_1	PRINTS	protein_match	159	179	4.8E-25	+	.	date=18-12-2020;Target=g13105.t1_1 159 179;ID=match$1277_159_179;signature_desc=High mobility group (HMG1/HMG2) protein signature;Name=PR00886;status=T
g13105.t1_1	Pfam	protein_match	13	84	1.7E-21	+	.	date=18-12-2020;Target=g13105.t1_1 13 84;ID=match$1278_13_84;signature_desc=HMG-box domain;Name=PF09011;status=T;Dbxref="InterPro:IPR009071"
g13105.t1_1	MobiDBLite	protein_match	239	255	.	+	.	date=18-12-2020;Target=g13105.t1_1 239 255;ID=match$1279_239_255;signature_desc=consensus disorder prediction;Name=mobidb-lite;status=T
g13105.t1_1	CDD	protein_match	15	82	2.89176E-17	+	.	date=18-12-2020;Target=g13105.t1_1 15 82;ID=match$1280_15_82;signature_desc=HMGB-UBF_HMG-box;Name=cd01390;status=T
g13105.t1_1	ProSitePatterns	protein_match	47	58	.	+	.	date=18-12-2020;Target=g13105.t1_1 47 58;Ontology_term="GO:0003677","GO:0005634";ID=match$1281_47_58;signature_desc=HMG box A DNA-binding domain signature.;Name=PS00353;status=T;Dbxref="InterPro:IPR017967"
g13105.t1_1	Coils	protein_match	153	177	.	+	.	date=18-12-2020;Target=g13105.t1_1 153 177;ID=match$1282_153_177;Name=Coil;status=T
g13105.t1_1	PANTHER	protein_match	9	252	7.7E-71	+	.	date=18-12-2020;Target=g13105.t1_1 9 252;ID=match$1283_9_252;Name=PTHR48112;status=T
g13105.t1_1	CDD	protein_match	107	171	4.63587E-21	+	.	date=18-12-2020;Target=g13105.t1_1 107 171;ID=match$1284_107_171;signature_desc=HMGB-UBF_HMG-box;Name=cd01390;status=T
g13105.t1_1	ProSiteProfiles	protein_match	15	85	16.665	+	.	date=18-12-2020;Target=g13105.t1_1 15 85;ID=match$1285_15_85;signature_desc=HMG boxes A and B DNA-binding domains profile.;Name=PS50118;status=T;Dbxref="InterPro:IPR009071"
g13105.t1_1	PANTHER	protein_match	9	252	7.7E-71	+	.	date=18-12-2020;Target=g13105.t1_1 9 252;ID=match$1286_9_252;Name=PTHR48112:SF22;status=T
g13105.t1_1	SUPERFAMILY	protein_match	94	177	1.44E-27	+	.	date=18-12-2020;Target=g13105.t1_1 94 177;ID=match$1287_94_177;Name=SSF47095;status=T;Dbxref="InterPro:IPR036910"
g13105.t1_1	MobiDBLite	protein_match	229	255	.	+	.	date=18-12-2020;Target=g13105.t1_1 229 255;ID=match$1288_229_255;signature_desc=consensus disorder prediction;Name=mobidb-lite;status=T
g13105.t1_1	SUPERFAMILY	protein_match	11	88	2.75E-23	+	.	date=18-12-2020;Target=g13105.t1_1 11 88;ID=match$1289_11_88;Name=SSF47095;status=T;Dbxref="InterPro:IPR036910"
g13105.t1_1	ProSiteProfiles	protein_match	107	175	19.711	+	.	date=18-12-2020;Target=g13105.t1_1 107 175;ID=match$1290_107_175;signature_desc=HMG boxes A and B DNA-binding domains profile.;Name=PS50118;status=T;Dbxref="InterPro:IPR009071"
g13105.t1_1	Pfam	protein_match	107	175	4.3E-22	+	.	date=18-12-2020;Target=g13105.t1_1 107 175;ID=match$1291_107_175;signature_desc=HMG (high mobility group) box;Name=PF00505;status=T;Dbxref="InterPro:IPR009071"
g6125.t1_1	.	polypeptide	1	301	.	+	.	ID=g6125.t1_1;md5=01d6914aae06032cc1f14af46a162122
g6125.t1_1	PRINTS	protein_match	86	98	1.4E-39	+	.	date=18-12-2020;Target=g6125.t1_1 86 98;Ontology_term="GO:0005471","GO:0005743","GO:0140021","GO:1990544";ID=match$1292_86_98;signature_desc=Adenine nucleotide translocator signature;Name=PR00927;status=T;Dbxref="InterPro:IPR002113"
g6125.t1_1	PRINTS	protein_match	53	74	1.4E-39	+	.	date=18-12-2020;Target=g6125.t1_1 53 74;Ontology_term="GO:0005471","GO:0005743","GO:0140021","GO:1990544";ID=match$1292_53_74;signature_desc=Adenine nucleotide translocator signature;Name=PR00927;status=T;Dbxref="InterPro:IPR002113"
g6125.t1_1	PRINTS	protein_match	113	126	1.4E-39	+	.	date=18-12-2020;Target=g6125.t1_1 113 126;Ontology_term="GO:0005471","GO:0005743","GO:0140021","GO:1990544";ID=match$1292_113_126;signature_desc=Adenine nucleotide translocator signature;Name=PR00927;status=T;Dbxref="InterPro:IPR002113"
g6125.t1_1	PRINTS	protein_match	215	231	1.4E-39	+	.	date=18-12-2020;Target=g6125.t1_1 215 231;Ontology_term="GO:0005471","GO:0005743","GO:0140021","GO:1990544";ID=match$1292_215_231;signature_desc=Adenine nucleotide translocator signature;Name=PR00927;status=T;Dbxref="InterPro:IPR002113"
g6125.t1_1	PRINTS	protein_match	10	22	1.4E-39	+	.	date=18-12-2020;Target=g6125.t1_1 10 22;Ontology_term="GO:0005471","GO:0005743","GO:0140021","GO:1990544";ID=match$1292_10_22;signature_desc=Adenine nucleotide translocator signature;Name=PR00927;status=T;Dbxref="InterPro:IPR002113"
g6125.t1_1	Gene3D	protein_match	6	300	1.4E-115	+	.	date=18-12-2020;Target=g6125.t1_1 6 300;ID=match$1293_6_300;Name=G3DSA:1.50.40.10;status=T;Dbxref="InterPro:IPR023395"
g6125.t1_1	Pfam	protein_match	210	300	6.3E-15	+	.	date=18-12-2020;Target=g6125.t1_1 210 300;ID=match$1294_210_300;signature_desc=Mitochondrial carrier protein;Name=PF00153;status=T;Dbxref="InterPro:IPR018108"
g6125.t1_1	Pfam	protein_match	115	205	1.7E-23	+	.	date=18-12-2020;Target=g6125.t1_1 115 205;ID=match$1294_115_205;signature_desc=Mitochondrial carrier protein;Name=PF00153;status=T;Dbxref="InterPro:IPR018108"
g6125.t1_1	Pfam	protein_match	8	102	1.6E-23	+	.	date=18-12-2020;Target=g6125.t1_1 8 102;ID=match$1294_8_102;signature_desc=Mitochondrial carrier protein;Name=PF00153;status=T;Dbxref="InterPro:IPR018108"
g6125.t1_1	PANTHER	protein_match	8	299	2.8E-164	+	.	date=18-12-2020;Target=g6125.t1_1 8 299;Ontology_term="GO:0005471","GO:0005743","GO:0140021","GO:1990544";ID=match$1295_8_299;Name=PTHR45635;status=T;Dbxref="InterPro:IPR002113"
g6125.t1_1	PRINTS	protein_match	176	194	7.1E-69	+	.	date=18-12-2020;Target=g6125.t1_1 176 194;Ontology_term="GO:0055085";ID=match$1296_176_194;signature_desc=Mitochondrial carrier protein signature;Name=PR00926;status=T;Dbxref="InterPro:IPR002067"
g6125.t1_1	PRINTS	protein_match	75	95	7.1E-69	+	.	date=18-12-2020;Target=g6125.t1_1 75 95;Ontology_term="GO:0055085";ID=match$1296_75_95;signature_desc=Mitochondrial carrier protein signature;Name=PR00926;status=T;Dbxref="InterPro:IPR002067"
g6125.t1_1	PRINTS	protein_match	219	241	7.1E-69	+	.	date=18-12-2020;Target=g6125.t1_1 219 241;Ontology_term="GO:0055085";ID=match$1296_219_241;signature_desc=Mitochondrial carrier protein signature;Name=PR00926;status=T;Dbxref="InterPro:IPR002067"
g6125.t1_1	PRINTS	protein_match	26	40	7.1E-69	+	.	date=18-12-2020;Target=g6125.t1_1 26 40;Ontology_term="GO:0055085";ID=match$1296_26_40;signature_desc=Mitochondrial carrier protein signature;Name=PR00926;status=T;Dbxref="InterPro:IPR002067"
g6125.t1_1	PRINTS	protein_match	13	26	7.1E-69	+	.	date=18-12-2020;Target=g6125.t1_1 13 26;Ontology_term="GO:0055085";ID=match$1296_13_26;signature_desc=Mitochondrial carrier protein signature;Name=PR00926;status=T;Dbxref="InterPro:IPR002067"
g6125.t1_1	PRINTS	protein_match	128	146	7.1E-69	+	.	date=18-12-2020;Target=g6125.t1_1 128 146;Ontology_term="GO:0055085";ID=match$1296_128_146;signature_desc=Mitochondrial carrier protein signature;Name=PR00926;status=T;Dbxref="InterPro:IPR002067"
g6125.t1_1	ProSiteProfiles	protein_match	214	299	23.2	+	.	date=18-12-2020;Target=g6125.t1_1 214 299;ID=match$1297_214_299;signature_desc=Solute carrier (Solcar) repeat profile.;Name=PS50920;status=T;Dbxref="InterPro:IPR018108"
g6125.t1_1	SUPERFAMILY	protein_match	7	295	1.07E-83	+	.	date=18-12-2020;Target=g6125.t1_1 7 295;ID=match$1298_7_295;Name=SSF103506;status=T;Dbxref="InterPro:IPR023395"
g6125.t1_1	ProSiteProfiles	protein_match	113	203	29.249	+	.	date=18-12-2020;Target=g6125.t1_1 113 203;ID=match$1299_113_203;signature_desc=Solute carrier (Solcar) repeat profile.;Name=PS50920;status=T;Dbxref="InterPro:IPR018108"
g6125.t1_1	ProSiteProfiles	protein_match	8	100	27.726	+	.	date=18-12-2020;Target=g6125.t1_1 8 100;ID=match$1300_8_100;signature_desc=Solute carrier (Solcar) repeat profile.;Name=PS50920;status=T;Dbxref="InterPro:IPR018108"
g6125.t1_1	PANTHER	protein_match	8	299	2.8E-164	+	.	date=18-12-2020;Target=g6125.t1_1 8 299;ID=match$1301_8_299;Name=PTHR45635:SF32;status=T
g10297.t1_1	.	polypeptide	1	623	.	+	.	ID=g10297.t1_1;md5=9c44b6e6b18d59a86fb1412f13a98634
g10297.t1_1	SMART	protein_match	206	500	4.9E-97	+	.	date=18-12-2020;Target=g10297.t1_1 206 500;ID=match$1302_206_500;Name=SM00136;status=T;Dbxref="InterPro:IPR008211"
g10297.t1_1	CDD	protein_match	501	548	8.05677E-11	+	.	date=18-12-2020;Target=g10297.t1_1 501 548;ID=match$1303_501_548;signature_desc=EGF_Lam;Name=cd00055;status=T
g10297.t1_1	MobiDBLite	protein_match	439	461	.	+	.	date=18-12-2020;Target=g10297.t1_1 439 461;ID=match$1304_439_461;signature_desc=consensus disorder prediction;Name=mobidb-lite;status=T
g10297.t1_1	PANTHER	protein_match	200	557	1.5E-98	+	.	date=18-12-2020;Target=g10297.t1_1 200 557;ID=match$1305_200_557;Name=PTHR10574;status=T
g10297.t1_1	SUPERFAMILY	protein_match	502	550	4.6E-10	+	.	date=18-12-2020;Target=g10297.t1_1 502 550;ID=match$1306_502_550;Name=SSF57196;status=T
g10297.t1_1	Gene3D	protein_match	191	457	7.0E-76	+	.	date=18-12-2020;Target=g10297.t1_1 191 457;ID=match$1307_191_457;Name=G3DSA:2.60.120.1490;status=T;Dbxref="InterPro:IPR038684"
g10297.t1_1	ProSiteProfiles	protein_match	502	557	12.597	+	.	date=18-12-2020;Target=g10297.t1_1 502 557;ID=match$1308_502_557;signature_desc=Laminin-type EGF-like (LE) domain profile.;Name=PS50027;status=T;Dbxref="InterPro:IPR002049"
g10297.t1_1	PANTHER	protein_match	200	557	1.5E-98	+	.	date=18-12-2020;Target=g10297.t1_1 200 557;ID=match$1309_200_557;Name=PTHR10574:SF365;status=T
g10297.t1_1	Pfam	protein_match	212	436	1.0E-65	+	.	date=18-12-2020;Target=g10297.t1_1 212 436;ID=match$1310_212_436;signature_desc=Laminin N-terminal (Domain VI);Name=PF00055;status=T;Dbxref="InterPro:IPR008211"
g10297.t1_1	Gene3D	protein_match	486	559	8.7E-23	+	.	date=18-12-2020;Target=g10297.t1_1 486 559;ID=match$1311_486_559;Name=G3DSA:2.10.25.10;status=T
g10297.t1_1	SMART	protein_match	502	555	5.1E-9	+	.	date=18-12-2020;Target=g10297.t1_1 502 555;ID=match$1312_502_555;Name=SM00180;status=T;Dbxref="InterPro:IPR002049"
g10297.t1_1	ProSiteProfiles	protein_match	208	501	46.978	+	.	date=18-12-2020;Target=g10297.t1_1 208 501;ID=match$1313_208_501;signature_desc=Laminin N-terminal domain profile.;Name=PS51117;status=T;Dbxref="InterPro:IPR008211"
g10297.t1_1	Pfam	protein_match	502	550	7.1E-9	+	.	date=18-12-2020;Target=g10297.t1_1 502 550;ID=match$1314_502_550;signature_desc=Laminin EGF domain;Name=PF00053;status=T;Dbxref="InterPro:IPR002049"
g2132.t1_1	.	polypeptide	1	189	.	+	.	ID=g2132.t1_1;md5=f69028d9eb5d7046c0653dc3f49b43f9
g2132.t1_1	MobiDBLite	protein_match	139	158	.	+	.	date=18-12-2020;Target=g2132.t1_1 139 158;ID=match$1315_139_158;signature_desc=consensus disorder prediction;Name=mobidb-lite;status=T
g16981.t1_1	.	polypeptide	1	394	.	+	.	ID=g16981.t1_1;md5=64d116a1132d8b89e2c5bdadd3b6c4ff
g16981.t1_1	ProSiteProfiles	protein_match	283	340	12.036	+	.	date=18-12-2020;Target=g16981.t1_1 283 340;Ontology_term="GO:0005576","GO:0008061";ID=match$1316_283_340;signature_desc=Chitin-binding type-2 domain profile.;Name=PS50940;status=T;Dbxref="InterPro:IPR002557"
g16981.t1_1	Pfam	protein_match	341	392	4.4E-9	+	.	date=18-12-2020;Target=g16981.t1_1 341 392;Ontology_term="GO:0005576","GO:0008061";ID=match$1317_341_392;signature_desc=Chitin binding Peritrophin-A domain;Name=PF01607;status=T;Dbxref="InterPro:IPR002557"
g16981.t1_1	Pfam	protein_match	293	338	7.6E-8	+	.	date=18-12-2020;Target=g16981.t1_1 293 338;Ontology_term="GO:0005576","GO:0008061";ID=match$1317_293_338;signature_desc=Chitin binding Peritrophin-A domain;Name=PF01607;status=T;Dbxref="InterPro:IPR002557"
g16981.t1_1	Pfam	protein_match	2	36	1.6E-5	+	.	date=18-12-2020;Target=g16981.t1_1 2 36;Ontology_term="GO:0005576","GO:0008061";ID=match$1317_2_36;signature_desc=Chitin binding Peritrophin-A domain;Name=PF01607;status=T;Dbxref="InterPro:IPR002557"
g16981.t1_1	Pfam	protein_match	170	225	4.4E-11	+	.	date=18-12-2020;Target=g16981.t1_1 170 225;Ontology_term="GO:0005576","GO:0008061";ID=match$1317_170_225;signature_desc=Chitin binding Peritrophin-A domain;Name=PF01607;status=T;Dbxref="InterPro:IPR002557"
g16981.t1_1	Pfam	protein_match	117	161	1.4E-6	+	.	date=18-12-2020;Target=g16981.t1_1 117 161;Ontology_term="GO:0005576","GO:0008061";ID=match$1317_117_161;signature_desc=Chitin binding Peritrophin-A domain;Name=PF01607;status=T;Dbxref="InterPro:IPR002557"
g16981.t1_1	ProSiteProfiles	protein_match	167	227	13.152	+	.	date=18-12-2020;Target=g16981.t1_1 167 227;Ontology_term="GO:0005576","GO:0008061";ID=match$1318_167_227;signature_desc=Chitin-binding type-2 domain profile.;Name=PS50940;status=T;Dbxref="InterPro:IPR002557"
g16981.t1_1	Gene3D	protein_match	170	233	6.4E-12	+	.	date=18-12-2020;Target=g16981.t1_1 170 233;ID=match$1319_170_233;Name=G3DSA:2.170.140.10;status=T
g16981.t1_1	Gene3D	protein_match	343	394	1.2E-8	+	.	date=18-12-2020;Target=g16981.t1_1 343 394;ID=match$1319_343_394;Name=G3DSA:2.170.140.10;status=T
g16981.t1_1	Gene3D	protein_match	116	163	4.1E-5	+	.	date=18-12-2020;Target=g16981.t1_1 116 163;ID=match$1319_116_163;Name=G3DSA:2.170.140.10;status=T
g16981.t1_1	Gene3D	protein_match	1	40	1.6E-6	+	.	date=18-12-2020;Target=g16981.t1_1 1 40;ID=match$1319_1_40;Name=G3DSA:2.170.140.10;status=T
g16981.t1_1	Gene3D	protein_match	279	342	5.2E-11	+	.	date=18-12-2020;Target=g16981.t1_1 279 342;ID=match$1319_279_342;Name=G3DSA:2.170.140.10;status=T
g16981.t1_1	PANTHER	protein_match	1	161	1.2E-37	+	.	date=18-12-2020;Target=g16981.t1_1 1 161;ID=match$1320_1_161;Name=PTHR23301;status=T
g16981.t1_1	PANTHER	protein_match	175	234	1.2E-37	+	.	date=18-12-2020;Target=g16981.t1_1 175 234;ID=match$1320_175_234;Name=PTHR23301;status=T
g16981.t1_1	ProSiteProfiles	protein_match	341	394	10.957	+	.	date=18-12-2020;Target=g16981.t1_1 341 394;Ontology_term="GO:0005576","GO:0008061";ID=match$1321_341_394;signature_desc=Chitin-binding type-2 domain profile.;Name=PS50940;status=T;Dbxref="InterPro:IPR002557"
g16981.t1_1	MobiDBLite	protein_match	58	112	.	+	.	date=18-12-2020;Target=g16981.t1_1 58 112;ID=match$1322_58_112;signature_desc=consensus disorder prediction;Name=mobidb-lite;status=T
g16981.t1_1	SUPERFAMILY	protein_match	128	161	5.49E-7	+	.	date=18-12-2020;Target=g16981.t1_1 128 161;Ontology_term="GO:0008061";ID=match$1323_128_161;Name=SSF57625;status=T;Dbxref="InterPro:IPR036508"
g16981.t1_1	PANTHER	protein_match	349	393	1.2E-37	+	.	date=18-12-2020;Target=g16981.t1_1 349 393;ID=match$1324_349_393;Name=PTHR23301;status=T
g16981.t1_1	PANTHER	protein_match	292	340	1.2E-37	+	.	date=18-12-2020;Target=g16981.t1_1 292 340;ID=match$1324_292_340;Name=PTHR23301;status=T
g16981.t1_1	ProSiteProfiles	protein_match	114	160	9.321	+	.	date=18-12-2020;Target=g16981.t1_1 114 160;Ontology_term="GO:0005576","GO:0008061";ID=match$1325_114_160;signature_desc=Chitin-binding type-2 domain profile.;Name=PS50940;status=T;Dbxref="InterPro:IPR002557"
g16981.t1_1	SUPERFAMILY	protein_match	341	393	3.92E-10	+	.	date=18-12-2020;Target=g16981.t1_1 341 393;Ontology_term="GO:0008061";ID=match$1326_341_393;Name=SSF57625;status=T;Dbxref="InterPro:IPR036508"
g16981.t1_1	SUPERFAMILY	protein_match	281	345	4.97E-12	+	.	date=18-12-2020;Target=g16981.t1_1 281 345;Ontology_term="GO:0008061";ID=match$1327_281_345;Name=SSF57625;status=T;Dbxref="InterPro:IPR036508"
g16981.t1_1	ProSiteProfiles	protein_match	1	38	9.486	+	.	date=18-12-2020;Target=g16981.t1_1 1 38;Ontology_term="GO:0005576","GO:0008061";ID=match$1328_1_38;signature_desc=Chitin-binding type-2 domain profile.;Name=PS50940;status=T;Dbxref="InterPro:IPR002557"
g16981.t1_1	PANTHER	protein_match	1	161	1.2E-37	+	.	date=18-12-2020;Target=g16981.t1_1 1 161;ID=match$1329_1_161;Name=PTHR23301:SF82;status=T
g16981.t1_1	PANTHER	protein_match	175	234	1.2E-37	+	.	date=18-12-2020;Target=g16981.t1_1 175 234;ID=match$1329_175_234;Name=PTHR23301:SF82;status=T
g16981.t1_1	SMART	protein_match	284	340	5.0E-9	+	.	date=18-12-2020;Target=g16981.t1_1 284 340;Ontology_term="GO:0005576","GO:0008061";ID=match$1330_284_340;Name=SM00494;status=T;Dbxref="InterPro:IPR002557"
g16981.t1_1	SMART	protein_match	168	227	1.6E-9	+	.	date=18-12-2020;Target=g16981.t1_1 168 227;Ontology_term="GO:0005576","GO:0008061";ID=match$1330_168_227;Name=SM00494;status=T;Dbxref="InterPro:IPR002557"
g16981.t1_1	SMART	protein_match	341	394	5.4E-5	+	.	date=18-12-2020;Target=g16981.t1_1 341 394;Ontology_term="GO:0005576","GO:0008061";ID=match$1330_341_394;Name=SM00494;status=T;Dbxref="InterPro:IPR002557"
g16981.t1_1	SMART	protein_match	1	38	34.0	+	.	date=18-12-2020;Target=g16981.t1_1 1 38;Ontology_term="GO:0005576","GO:0008061";ID=match$1330_1_38;Name=SM00494;status=T;Dbxref="InterPro:IPR002557"
g16981.t1_1	SMART	protein_match	115	167	8.9	+	.	date=18-12-2020;Target=g16981.t1_1 115 167;Ontology_term="GO:0005576","GO:0008061";ID=match$1330_115_167;Name=SM00494;status=T;Dbxref="InterPro:IPR002557"
g16981.t1_1	SUPERFAMILY	protein_match	1	45	4.45E-9	+	.	date=18-12-2020;Target=g16981.t1_1 1 45;Ontology_term="GO:0008061";ID=match$1331_1_45;Name=SSF57625;status=T;Dbxref="InterPro:IPR036508"
g16981.t1_1	MobiDBLite	protein_match	39	112	.	+	.	date=18-12-2020;Target=g16981.t1_1 39 112;ID=match$1332_39_112;signature_desc=consensus disorder prediction;Name=mobidb-lite;status=T
g16981.t1_1	SUPERFAMILY	protein_match	170	232	2.51E-12	+	.	date=18-12-2020;Target=g16981.t1_1 170 232;Ontology_term="GO:0008061";ID=match$1333_170_232;Name=SSF57625;status=T;Dbxref="InterPro:IPR036508"
g16981.t1_1	PANTHER	protein_match	349	393	1.2E-37	+	.	date=18-12-2020;Target=g16981.t1_1 349 393;ID=match$1334_349_393;Name=PTHR23301:SF82;status=T
g16981.t1_1	PANTHER	protein_match	292	340	1.2E-37	+	.	date=18-12-2020;Target=g16981.t1_1 292 340;ID=match$1334_292_340;Name=PTHR23301:SF82;status=T
g17695.t1_1	.	polypeptide	1	1095	.	+	.	ID=g17695.t1_1;md5=c246658ef22bcf05a4a9f933fad58269
g17695.t1_1	MobiDBLite	protein_match	336	359	.	+	.	date=18-12-2020;Target=g17695.t1_1 336 359;ID=match$1335_336_359;signature_desc=consensus disorder prediction;Name=mobidb-lite;status=T
g17695.t1_1	MobiDBLite	protein_match	1045	1079	.	+	.	date=18-12-2020;Target=g17695.t1_1 1045 1079;ID=match$1336_1045_1079;signature_desc=consensus disorder prediction;Name=mobidb-lite;status=T
g17695.t1_1	MobiDBLite	protein_match	426	440	.	+	.	date=18-12-2020;Target=g17695.t1_1 426 440;ID=match$1337_426_440;signature_desc=consensus disorder prediction;Name=mobidb-lite;status=T
g17695.t1_1	MobiDBLite	protein_match	126	153	.	+	.	date=18-12-2020;Target=g17695.t1_1 126 153;ID=match$1338_126_153;signature_desc=consensus disorder prediction;Name=mobidb-lite;status=T
g17695.t1_1	MobiDBLite	protein_match	1012	1095	.	+	.	date=18-12-2020;Target=g17695.t1_1 1012 1095;ID=match$1339_1012_1095;signature_desc=consensus disorder prediction;Name=mobidb-lite;status=T
g17695.t1_1	MobiDBLite	protein_match	336	360	.	+	.	date=18-12-2020;Target=g17695.t1_1 336 360;ID=match$1340_336_360;signature_desc=consensus disorder prediction;Name=mobidb-lite;status=T
g17695.t1_1	MobiDBLite	protein_match	75	95	.	+	.	date=18-12-2020;Target=g17695.t1_1 75 95;ID=match$1341_75_95;signature_desc=consensus disorder prediction;Name=mobidb-lite;status=T
g17695.t1_1	MobiDBLite	protein_match	620	672	.	+	.	date=18-12-2020;Target=g17695.t1_1 620 672;ID=match$1342_620_672;signature_desc=consensus disorder prediction;Name=mobidb-lite;status=T
g17695.t1_1	MobiDBLite	protein_match	234	250	.	+	.	date=18-12-2020;Target=g17695.t1_1 234 250;ID=match$1343_234_250;signature_desc=consensus disorder prediction;Name=mobidb-lite;status=T
g17695.t1_1	MobiDBLite	protein_match	447	485	.	+	.	date=18-12-2020;Target=g17695.t1_1 447 485;ID=match$1344_447_485;signature_desc=consensus disorder prediction;Name=mobidb-lite;status=T
g17695.t1_1	MobiDBLite	protein_match	507	569	.	+	.	date=18-12-2020;Target=g17695.t1_1 507 569;ID=match$1345_507_569;signature_desc=consensus disorder prediction;Name=mobidb-lite;status=T
g17695.t1_1	MobiDBLite	protein_match	1	109	.	+	.	date=18-12-2020;Target=g17695.t1_1 1 109;ID=match$1346_1_109;signature_desc=consensus disorder prediction;Name=mobidb-lite;status=T
g17695.t1_1	MobiDBLite	protein_match	187	250	.	+	.	date=18-12-2020;Target=g17695.t1_1 187 250;ID=match$1347_187_250;signature_desc=consensus disorder prediction;Name=mobidb-lite;status=T
g17695.t1_1	MobiDBLite	protein_match	426	485	.	+	.	date=18-12-2020;Target=g17695.t1_1 426 485;ID=match$1348_426_485;signature_desc=consensus disorder prediction;Name=mobidb-lite;status=T
g17695.t1_1	MobiDBLite	protein_match	620	634	.	+	.	date=18-12-2020;Target=g17695.t1_1 620 634;ID=match$1349_620_634;signature_desc=consensus disorder prediction;Name=mobidb-lite;status=T
g17695.t1_1	MobiDBLite	protein_match	507	552	.	+	.	date=18-12-2020;Target=g17695.t1_1 507 552;ID=match$1350_507_552;signature_desc=consensus disorder prediction;Name=mobidb-lite;status=T
g10634.t1_1	.	polypeptide	1	246	.	+	.	ID=g10634.t1_1;md5=67f86f8724197c36e0762d7c22eaaaf4
g10634.t1_1	SUPERFAMILY	protein_match	101	231	2.41E-29	+	.	date=18-12-2020;Target=g10634.t1_1 101 231;ID=match$1351_101_231;Name=SSF47954;status=T;Dbxref="InterPro:IPR036915"
g10634.t1_1	SMART	protein_match	101	230	1.4E-26	+	.	date=18-12-2020;Target=g10634.t1_1 101 230;ID=match$1352_101_230;Name=SM01332;status=T;Dbxref="InterPro:IPR004367"
g10634.t1_1	Pfam	protein_match	101	229	2.9E-27	+	.	date=18-12-2020;Target=g10634.t1_1 101 229;ID=match$1353_101_229;signature_desc=Cyclin, C-terminal domain;Name=PF02984;status=T;Dbxref="InterPro:IPR004367"
g10634.t1_1	CDD	protein_match	1	91	6.77343E-21	+	.	date=18-12-2020;Target=g10634.t1_1 1 91;ID=match$1354_1_91;signature_desc=CYCLIN;Name=cd00043;status=T;Dbxref="InterPro:IPR013763"
g10634.t1_1	SUPERFAMILY	protein_match	1	98	1.38E-37	+	.	date=18-12-2020;Target=g10634.t1_1 1 98;ID=match$1355_1_98;Name=SSF47954;status=T;Dbxref="InterPro:IPR036915"
g10634.t1_1	PANTHER	protein_match	1	240	1.2E-73	+	.	date=18-12-2020;Target=g10634.t1_1 1 240;ID=match$1356_1_240;Name=PTHR10177:SF193;status=T
g10634.t1_1	SMART	protein_match	7	92	7.0E-26	+	.	date=18-12-2020;Target=g10634.t1_1 7 92;ID=match$1357_7_92;Name=SM00385;status=T;Dbxref="InterPro:IPR013763"
g10634.t1_1	SMART	protein_match	105	196	3.1E-11	+	.	date=18-12-2020;Target=g10634.t1_1 105 196;ID=match$1357_105_196;Name=SM00385;status=T;Dbxref="InterPro:IPR013763"
g10634.t1_1	Gene3D	protein_match	100	226	3.1E-82	+	.	date=18-12-2020;Target=g10634.t1_1 100 226;ID=match$1358_100_226;Name=G3DSA:1.10.472.10;status=T
g10634.t1_1	Pfam	protein_match	1	98	2.9E-36	+	.	date=18-12-2020;Target=g10634.t1_1 1 98;ID=match$1359_1_98;signature_desc=Cyclin, N-terminal domain;Name=PF00134;status=T;Dbxref="InterPro:IPR006671"
g10634.t1_1	ProSitePatterns	protein_match	2	33	.	+	.	date=18-12-2020;Target=g10634.t1_1 2 33;ID=match$1360_2_33;signature_desc=Cyclins signature.;Name=PS00292;status=T;Dbxref="InterPro:IPR006671"
g10634.t1_1	PANTHER	protein_match	1	240	1.2E-73	+	.	date=18-12-2020;Target=g10634.t1_1 1 240;ID=match$1361_1_240;Name=PTHR10177;status=T;Dbxref="InterPro:IPR039361"
g10634.t1_1	PIRSF	protein_match	1	239	1.7E-86	+	.	date=18-12-2020;Target=g10634.t1_1 1 239;ID=match$1362_1_239;Name=PIRSF001771;status=T;Dbxref="InterPro:IPR039361"
g10634.t1_1	Gene3D	protein_match	1	99	3.1E-82	+	.	date=18-12-2020;Target=g10634.t1_1 1 99;ID=match$1363_1_99;Name=G3DSA:1.10.472.10;status=T
g10634.t1_1	CDD	protein_match	101	183	4.19129E-12	+	.	date=18-12-2020;Target=g10634.t1_1 101 183;ID=match$1364_101_183;signature_desc=CYCLIN;Name=cd00043;status=T;Dbxref="InterPro:IPR013763"
g6471.t1_1	.	polypeptide	1	1112	.	+	.	ID=g6471.t1_1;md5=66926b1fb4246cf235d1a8c20cb8c8d2
g6471.t1_1	MobiDBLite	protein_match	716	738	.	+	.	date=18-12-2020;Target=g6471.t1_1 716 738;ID=match$1365_716_738;signature_desc=consensus disorder prediction;Name=mobidb-lite;status=T
g6471.t1_1	MobiDBLite	protein_match	936	966	.	+	.	date=18-12-2020;Target=g6471.t1_1 936 966;ID=match$1366_936_966;signature_desc=consensus disorder prediction;Name=mobidb-lite;status=T
g6471.t1_1	MobiDBLite	protein_match	296	322	.	+	.	date=18-12-2020;Target=g6471.t1_1 296 322;ID=match$1367_296_322;signature_desc=consensus disorder prediction;Name=mobidb-lite;status=T
g6471.t1_1	MobiDBLite	protein_match	296	313	.	+	.	date=18-12-2020;Target=g6471.t1_1 296 313;ID=match$1368_296_313;signature_desc=consensus disorder prediction;Name=mobidb-lite;status=T
g6471.t1_1	MobiDBLite	protein_match	716	732	.	+	.	date=18-12-2020;Target=g6471.t1_1 716 732;ID=match$1369_716_732;signature_desc=consensus disorder prediction;Name=mobidb-lite;status=T
g6471.t1_1	MobiDBLite	protein_match	898	995	.	+	.	date=18-12-2020;Target=g6471.t1_1 898 995;ID=match$1370_898_995;signature_desc=consensus disorder prediction;Name=mobidb-lite;status=T
g6471.t1_1	MobiDBLite	protein_match	149	180	.	+	.	date=18-12-2020;Target=g6471.t1_1 149 180;ID=match$1371_149_180;signature_desc=consensus disorder prediction;Name=mobidb-lite;status=T
g6471.t1_1	MobiDBLite	protein_match	420	442	.	+	.	date=18-12-2020;Target=g6471.t1_1 420 442;ID=match$1372_420_442;signature_desc=consensus disorder prediction;Name=mobidb-lite;status=T
g6471.t1_1	MobiDBLite	protein_match	509	554	.	+	.	date=18-12-2020;Target=g6471.t1_1 509 554;ID=match$1373_509_554;signature_desc=consensus disorder prediction;Name=mobidb-lite;status=T
g6471.t1_1	MobiDBLite	protein_match	907	926	.	+	.	date=18-12-2020;Target=g6471.t1_1 907 926;ID=match$1374_907_926;signature_desc=consensus disorder prediction;Name=mobidb-lite;status=T
g6471.t1_1	MobiDBLite	protein_match	967	990	.	+	.	date=18-12-2020;Target=g6471.t1_1 967 990;ID=match$1375_967_990;signature_desc=consensus disorder prediction;Name=mobidb-lite;status=T
g5809.t1_1	.	polypeptide	1	144	.	+	.	ID=g5809.t1_1;md5=24fd7a05781ff2ad7bb9fdc6c48a7344
g5809.t1_1	MobiDBLite	protein_match	50	95	.	+	.	date=18-12-2020;Target=g5809.t1_1 50 95;ID=match$1376_50_95;signature_desc=consensus disorder prediction;Name=mobidb-lite;status=T
g5809.t1_1	MobiDBLite	protein_match	50	64	.	+	.	date=18-12-2020;Target=g5809.t1_1 50 64;ID=match$1377_50_64;signature_desc=consensus disorder prediction;Name=mobidb-lite;status=T
g5809.t1_1	MobiDBLite	protein_match	65	87	.	+	.	date=18-12-2020;Target=g5809.t1_1 65 87;ID=match$1378_65_87;signature_desc=consensus disorder prediction;Name=mobidb-lite;status=T
g5809.t1_1	MobiDBLite	protein_match	111	144	.	+	.	date=18-12-2020;Target=g5809.t1_1 111 144;ID=match$1379_111_144;signature_desc=consensus disorder prediction;Name=mobidb-lite;status=T
g10593.t1_1	.	polypeptide	1	583	.	+	.	ID=g10593.t1_1;md5=84c04ed2329054d8363c588ee8395cb2
g10593.t1_1	MobiDBLite	protein_match	537	559	.	+	.	date=18-12-2020;Target=g10593.t1_1 537 559;ID=match$1380_537_559;signature_desc=consensus disorder prediction;Name=mobidb-lite;status=T
g10593.t1_1	Pfam	protein_match	224	510	1.8E-85	+	.	date=18-12-2020;Target=g10593.t1_1 224 510;Ontology_term="GO:0016021";ID=match$1381_224_510;signature_desc=Lung seven transmembrane receptor;Name=PF06814;status=T;Dbxref="InterPro:IPR009637"
g10593.t1_1	MobiDBLite	protein_match	537	557	.	+	.	date=18-12-2020;Target=g10593.t1_1 537 557;ID=match$1382_537_557;signature_desc=consensus disorder prediction;Name=mobidb-lite;status=T
g10593.t1_1	MobiDBLite	protein_match	564	583	.	+	.	date=18-12-2020;Target=g10593.t1_1 564 583;ID=match$1383_564_583;signature_desc=consensus disorder prediction;Name=mobidb-lite;status=T
g10593.t1_1	PANTHER	protein_match	13	549	2.9E-177	+	.	date=18-12-2020;Target=g10593.t1_1 13 549;Ontology_term="GO:0016021";ID=match$1384_13_549;Name=PTHR21229;status=T;Dbxref="InterPro:IPR009637"
g10593.t1_1	PANTHER	protein_match	13	549	2.9E-177	+	.	date=18-12-2020;Target=g10593.t1_1 13 549;ID=match$1385_13_549;Name=PTHR21229:SF12;status=T
g2231.t1_1	.	polypeptide	1	340	.	+	.	ID=g2231.t1_1;md5=476b44dc697c674f2f53f5891a41363b
g2231.t1_1	PANTHER	protein_match	11	257	3.6E-12	+	.	date=18-12-2020;Target=g2231.t1_1 11 257;ID=match$1386_11_257;Name=PTHR12336;status=T;Dbxref="InterPro:IPR031874"
g11991.t1_1	.	polypeptide	1	108	.	+	.	ID=g11991.t1_1;md5=94c240e61f9a3e1e8d9fcd0b97d72137
g11991.t1_1	MobiDBLite	protein_match	9	33	.	+	.	date=18-12-2020;Target=g11991.t1_1 9 33;ID=match$1387_9_33;signature_desc=consensus disorder prediction;Name=mobidb-lite;status=T
g986.t1_1	.	polypeptide	1	394	.	+	.	ID=g986.t1_1;md5=73c8ae6eead68ea652c9acc47c4c4197
g986.t1_1	SMART	protein_match	342	394	8.2E-16	+	.	date=18-12-2020;Target=g986.t1_1 342 394;Ontology_term="GO:0005576","GO:0008061";ID=match$1388_342_394;Name=SM00494;status=T;Dbxref="InterPro:IPR002557"
g986.t1_1	Gene3D	protein_match	3	291	3.7E-107	+	.	date=18-12-2020;Target=g986.t1_1 3 291;ID=match$1389_3_291;Name=G3DSA:3.20.20.80;status=T
g986.t1_1	SUPERFAMILY	protein_match	179	245	3.14E-20	+	.	date=18-12-2020;Target=g986.t1_1 179 245;ID=match$1390_179_245;Name=SSF54556;status=T;Dbxref="InterPro:IPR029070"
g986.t1_1	ProSitePatterns	protein_match	56	64	.	+	.	date=18-12-2020;Target=g986.t1_1 56 64;Ontology_term="GO:0004553","GO:0005975";ID=match$1391_56_64;signature_desc=Chitinases family 18 active site.;Name=PS01095;status=T;Dbxref="InterPro:IPR001579"
g986.t1_1	Gene3D	protein_match	336	394	1.8E-18	+	.	date=18-12-2020;Target=g986.t1_1 336 394;ID=match$1392_336_394;Name=G3DSA:2.170.140.10;status=T
g986.t1_1	Pfam	protein_match	3	274	4.5E-73	+	.	date=18-12-2020;Target=g986.t1_1 3 274;Ontology_term="GO:0005975";ID=match$1393_3_274;signature_desc=Glycosyl hydrolases family 18;Name=PF00704;status=T;Dbxref="InterPro:IPR001223"
g986.t1_1	ProSiteProfiles	protein_match	341	394	14.395	+	.	date=18-12-2020;Target=g986.t1_1 341 394;Ontology_term="GO:0005576","GO:0008061";ID=match$1394_341_394;signature_desc=Chitin-binding type-2 domain profile.;Name=PS50940;status=T;Dbxref="InterPro:IPR002557"
g986.t1_1	SUPERFAMILY	protein_match	3	293	1.26E-75	+	.	date=18-12-2020;Target=g986.t1_1 3 293;ID=match$1395_3_293;Name=SSF51445;status=T;Dbxref="InterPro:IPR017853"
g986.t1_1	Pfam	protein_match	344	393	1.9E-17	+	.	date=18-12-2020;Target=g986.t1_1 344 393;Ontology_term="GO:0005576","GO:0008061";ID=match$1396_344_393;signature_desc=Chitin binding Peritrophin-A domain;Name=PF01607;status=T;Dbxref="InterPro:IPR002557"
g986.t1_1	SMART	protein_match	1	274	2.8E-84	+	.	date=18-12-2020;Target=g986.t1_1 1 274;Ontology_term="GO:0008061";ID=match$1397_1_274;Name=SM00636;status=T;Dbxref="InterPro:IPR011583"
g986.t1_1	SUPERFAMILY	protein_match	338	393	2.62E-19	+	.	date=18-12-2020;Target=g986.t1_1 338 393;Ontology_term="GO:0008061";ID=match$1398_338_393;Name=SSF57625;status=T;Dbxref="InterPro:IPR036508"
g986.t1_1	Gene3D	protein_match	178	245	3.7E-107	+	.	date=18-12-2020;Target=g986.t1_1 178 245;ID=match$1399_178_245;Name=G3DSA:3.10.50.10;status=T;Dbxref="InterPro:IPR029070"
g986.t1_1	PANTHER	protein_match	2	321	5.9E-103	+	.	date=18-12-2020;Target=g986.t1_1 2 321;ID=match$1400_2_321;Name=PTHR11177;status=T
g986.t1_1	PANTHER	protein_match	2	321	5.9E-103	+	.	date=18-12-2020;Target=g986.t1_1 2 321;ID=match$1401_2_321;Name=PTHR11177:SF360;status=T
g1151.t1_1	.	polypeptide	1	177	.	+	.	ID=g1151.t1_1;md5=b963dae4d84c266ccfb0d7595732169e
g1151.t1_1	Gene3D	protein_match	3	160	4.5E-64	+	.	date=18-12-2020;Target=g1151.t1_1 3 160;ID=match$1402_3_160;Name=G3DSA:1.20.1260.100;status=T;Dbxref="InterPro:IPR038330"
g1151.t1_1	PANTHER	protein_match	6	165	5.8E-64	+	.	date=18-12-2020;Target=g1151.t1_1 6 165;Ontology_term="GO:0016021";ID=match$1403_6_165;Name=PTHR10057;status=T;Dbxref="InterPro:IPR004307"
g1151.t1_1	CDD	protein_match	9	156	8.87046E-61	+	.	date=18-12-2020;Target=g1151.t1_1 9 156;Ontology_term="GO:0016021";ID=match$1404_9_156;signature_desc=TSPO_MBR;Name=cd15904;status=T;Dbxref="InterPro:IPR004307"
g1151.t1_1	PIRSF	protein_match	2	160	7.3E-56	+	.	date=18-12-2020;Target=g1151.t1_1 2 160;Ontology_term="GO:0016021";ID=match$1405_2_160;Name=PIRSF005859;status=T;Dbxref="InterPro:IPR004307"
g1151.t1_1	Pfam	protein_match	12	156	7.5E-52	+	.	date=18-12-2020;Target=g1151.t1_1 12 156;Ontology_term="GO:0016021";ID=match$1406_12_156;signature_desc=TspO/MBR family;Name=PF03073;status=T;Dbxref="InterPro:IPR004307"
g11189.t1_1	.	polypeptide	1	957	.	+	.	ID=g11189.t1_1;md5=023e180b23a0665b0ab73f7dbdcf6eaf
g11189.t1_1	Gene3D	protein_match	645	942	7.2E-13	+	.	date=18-12-2020;Target=g11189.t1_1 645 942;ID=match$1407_645_942;Name=G3DSA:1.25.10.10;status=T;Dbxref="InterPro:IPR011989"
g11189.t1_1	SUPERFAMILY	protein_match	410	939	2.97E-27	+	.	date=18-12-2020;Target=g11189.t1_1 410 939;ID=match$1408_410_939;Name=SSF48371;status=T;Dbxref="InterPro:IPR016024"
g11189.t1_1	Pfam	protein_match	549	882	1.0E-36	+	.	date=18-12-2020;Target=g11189.t1_1 549 882;ID=match$1409_549_882;signature_desc=RNAPII transcription regulator C-terminal;Name=PF12460;status=T;Dbxref="InterPro:IPR024687"
g11189.t1_1	PANTHER	protein_match	5	943	1.4E-171	+	.	date=18-12-2020;Target=g11189.t1_1 5 943;Ontology_term="GO:0097428";ID=match$1410_5_943;Name=PTHR12891;status=T;Dbxref="InterPro:IPR039920"
g11189.t1_1	SUPERFAMILY	protein_match	28	420	6.33E-7	+	.	date=18-12-2020;Target=g11189.t1_1 28 420;ID=match$1411_28_420;Name=SSF48371;status=T;Dbxref="InterPro:IPR016024"
g11189.t1_1	Pfam	protein_match	30	290	1.0E-81	+	.	date=18-12-2020;Target=g11189.t1_1 30 290;ID=match$1412_30_290;signature_desc=Dos2-interacting transcription regulator of RNA-Pol-II;Name=PF14500;status=T;Dbxref="InterPro:IPR029240"
g11770.t1_1	.	polypeptide	1	853	.	+	.	ID=g11770.t1_1;md5=c3e03600a6a5a72c602028017a1b77f3
g11770.t1_1	ProSitePatterns	protein_match	731	751	.	+	.	date=18-12-2020;Target=g11770.t1_1 731 751;ID=match$1413_731_751;signature_desc=Zinc finger C2H2 type domain signature.;Name=PS00028;status=T;Dbxref="InterPro:IPR013087"
g11770.t1_1	Gene3D	protein_match	582	626	1.6E-11	+	.	date=18-12-2020;Target=g11770.t1_1 582 626;ID=match$1414_582_626;Name=G3DSA:3.30.160.60;status=T
g11770.t1_1	Gene3D	protein_match	782	808	2.9E-12	+	.	date=18-12-2020;Target=g11770.t1_1 782 808;ID=match$1415_782_808;Name=G3DSA:3.30.160.60;status=T
g11770.t1_1	SUPERFAMILY	protein_match	349	405	3.51E-20	+	.	date=18-12-2020;Target=g11770.t1_1 349 405;ID=match$1416_349_405;Name=SSF57667;status=T;Dbxref="InterPro:IPR036236"
g11770.t1_1	ProSiteProfiles	protein_match	396	423	15.438	+	.	date=18-12-2020;Target=g11770.t1_1 396 423;ID=match$1417_396_423;signature_desc=Zinc finger C2H2 type domain profile.;Name=PS50157;status=T;Dbxref="InterPro:IPR013087"
g11770.t1_1	Gene3D	protein_match	392	426	9.6E-14	+	.	date=18-12-2020;Target=g11770.t1_1 392 426;ID=match$1418_392_426;Name=G3DSA:3.30.160.60;status=T
g11770.t1_1	PANTHER	protein_match	728	836	4.6E-261	+	.	date=18-12-2020;Target=g11770.t1_1 728 836;ID=match$1419_728_836;Name=PTHR24390:SF168;status=T
g11770.t1_1	Coils	protein_match	143	153	.	+	.	date=18-12-2020;Target=g11770.t1_1 143 153;ID=match$1420_143_153;Name=Coil;status=T
g11770.t1_1	Gene3D	protein_match	427	451	1.2E-10	+	.	date=18-12-2020;Target=g11770.t1_1 427 451;ID=match$1421_427_451;Name=G3DSA:3.30.160.60;status=T
g11770.t1_1	SUPERFAMILY	protein_match	404	453	4.23E-15	+	.	date=18-12-2020;Target=g11770.t1_1 404 453;ID=match$1422_404_453;Name=SSF57667;status=T;Dbxref="InterPro:IPR036236"
g11770.t1_1	ProSiteProfiles	protein_match	368	395	17.142	+	.	date=18-12-2020;Target=g11770.t1_1 368 395;ID=match$1423_368_395;signature_desc=Zinc finger C2H2 type domain profile.;Name=PS50157;status=T;Dbxref="InterPro:IPR013087"
g11770.t1_1	ProSitePatterns	protein_match	759	779	.	+	.	date=18-12-2020;Target=g11770.t1_1 759 779;ID=match$1424_759_779;signature_desc=Zinc finger C2H2 type domain signature.;Name=PS00028;status=T;Dbxref="InterPro:IPR013087"
g11770.t1_1	SUPERFAMILY	protein_match	779	831	4.72E-17	+	.	date=18-12-2020;Target=g11770.t1_1 779 831;ID=match$1425_779_831;Name=SSF57667;status=T;Dbxref="InterPro:IPR036236"
g11770.t1_1	Gene3D	protein_match	339	368	5.9E-12	+	.	date=18-12-2020;Target=g11770.t1_1 339 368;ID=match$1426_339_368;Name=G3DSA:3.30.160.60;status=T
g11770.t1_1	Gene3D	protein_match	730	757	2.5E-7	+	.	date=18-12-2020;Target=g11770.t1_1 730 757;ID=match$1426_730_757;Name=G3DSA:3.30.160.60;status=T
g11770.t1_1	ProSiteProfiles	protein_match	594	621	15.791	+	.	date=18-12-2020;Target=g11770.t1_1 594 621;ID=match$1427_594_621;signature_desc=Zinc finger C2H2 type domain profile.;Name=PS50157;status=T;Dbxref="InterPro:IPR013087"
g11770.t1_1	MobiDBLite	protein_match	82	108	.	+	.	date=18-12-2020;Target=g11770.t1_1 82 108;ID=match$1428_82_108;signature_desc=consensus disorder prediction;Name=mobidb-lite;status=T
g11770.t1_1	SUPERFAMILY	protein_match	589	622	2.82E-8	+	.	date=18-12-2020;Target=g11770.t1_1 589 622;ID=match$1429_589_622;Name=SSF57667;status=T;Dbxref="InterPro:IPR036236"
g11770.t1_1	PANTHER	protein_match	728	836	4.6E-261	+	.	date=18-12-2020;Target=g11770.t1_1 728 836;ID=match$1430_728_836;Name=PTHR24390;status=T
g11770.t1_1	ProSitePatterns	protein_match	342	362	.	+	.	date=18-12-2020;Target=g11770.t1_1 342 362;ID=match$1431_342_362;signature_desc=Zinc finger C2H2 type domain signature.;Name=PS00028;status=T;Dbxref="InterPro:IPR013087"
g11770.t1_1	PANTHER	protein_match	456	623	4.6E-261	+	.	date=18-12-2020;Target=g11770.t1_1 456 623;ID=match$1432_456_623;Name=PTHR24390:SF168;status=T
g11770.t1_1	ProSitePatterns	protein_match	426	448	.	+	.	date=18-12-2020;Target=g11770.t1_1 426 448;ID=match$1433_426_448;signature_desc=Zinc finger C2H2 type domain signature.;Name=PS00028;status=T;Dbxref="InterPro:IPR013087"
g11770.t1_1	MobiDBLite	protein_match	75	197	.	+	.	date=18-12-2020;Target=g11770.t1_1 75 197;ID=match$1434_75_197;signature_desc=consensus disorder prediction;Name=mobidb-lite;status=T
g11770.t1_1	ProSitePatterns	protein_match	787	807	.	+	.	date=18-12-2020;Target=g11770.t1_1 787 807;ID=match$1435_787_807;signature_desc=Zinc finger C2H2 type domain signature.;Name=PS00028;status=T;Dbxref="InterPro:IPR013087"
g11770.t1_1	MobiDBLite	protein_match	140	176	.	+	.	date=18-12-2020;Target=g11770.t1_1 140 176;ID=match$1436_140_176;signature_desc=consensus disorder prediction;Name=mobidb-lite;status=T
g11770.t1_1	ProSiteProfiles	protein_match	785	812	15.168	+	.	date=18-12-2020;Target=g11770.t1_1 785 812;ID=match$1437_785_812;signature_desc=Zinc finger C2H2 type domain profile.;Name=PS50157;status=T;Dbxref="InterPro:IPR013087"
g11770.t1_1	Pfam	protein_match	370	390	8.0E-6	+	.	date=18-12-2020;Target=g11770.t1_1 370 390;ID=match$1438_370_390;signature_desc=Zinc finger, C2H2 type;Name=PF00096;status=T;Dbxref="InterPro:IPR013087"
g11770.t1_1	Pfam	protein_match	340	362	6.0E-4	+	.	date=18-12-2020;Target=g11770.t1_1 340 362;ID=match$1438_340_362;signature_desc=Zinc finger, C2H2 type;Name=PF00096;status=T;Dbxref="InterPro:IPR013087"
g11770.t1_1	Pfam	protein_match	730	751	0.0083	+	.	date=18-12-2020;Target=g11770.t1_1 730 751;ID=match$1438_730_751;signature_desc=Zinc finger, C2H2 type;Name=PF00096;status=T;Dbxref="InterPro:IPR013087"
g11770.t1_1	Pfam	protein_match	757	779	7.4E-7	+	.	date=18-12-2020;Target=g11770.t1_1 757 779;ID=match$1438_757_779;signature_desc=Zinc finger, C2H2 type;Name=PF00096;status=T;Dbxref="InterPro:IPR013087"
g11770.t1_1	Pfam	protein_match	396	418	0.0038	+	.	date=18-12-2020;Target=g11770.t1_1 396 418;ID=match$1438_396_418;signature_desc=Zinc finger, C2H2 type;Name=PF00096;status=T;Dbxref="InterPro:IPR013087"
g11770.t1_1	Pfam	protein_match	594	616	6.0E-4	+	.	date=18-12-2020;Target=g11770.t1_1 594 616;ID=match$1438_594_616;signature_desc=Zinc finger, C2H2 type;Name=PF00096;status=T;Dbxref="InterPro:IPR013087"
g11770.t1_1	Gene3D	protein_match	369	391	1.9E-14	+	.	date=18-12-2020;Target=g11770.t1_1 369 391;ID=match$1439_369_391;Name=G3DSA:3.30.160.60;status=T
g11770.t1_1	PANTHER	protein_match	159	392	4.6E-261	+	.	date=18-12-2020;Target=g11770.t1_1 159 392;ID=match$1440_159_392;Name=PTHR24390:SF168;status=T
g11770.t1_1	PANTHER	protein_match	379	453	4.6E-261	+	.	date=18-12-2020;Target=g11770.t1_1 379 453;ID=match$1440_379_453;Name=PTHR24390:SF168;status=T
g11770.t1_1	MobiDBLite	protein_match	505	589	.	+	.	date=18-12-2020;Target=g11770.t1_1 505 589;ID=match$1441_505_589;signature_desc=consensus disorder prediction;Name=mobidb-lite;status=T
g11770.t1_1	PANTHER	protein_match	456	623	4.6E-261	+	.	date=18-12-2020;Target=g11770.t1_1 456 623;ID=match$1442_456_623;Name=PTHR24390;status=T
g11770.t1_1	MobiDBLite	protein_match	263	333	.	+	.	date=18-12-2020;Target=g11770.t1_1 263 333;ID=match$1443_263_333;signature_desc=consensus disorder prediction;Name=mobidb-lite;status=T
g11770.t1_1	ProSiteProfiles	protein_match	729	756	11.572	+	.	date=18-12-2020;Target=g11770.t1_1 729 756;ID=match$1444_729_756;signature_desc=Zinc finger C2H2 type domain profile.;Name=PS50157;status=T;Dbxref="InterPro:IPR013087"
g11770.t1_1	ProSitePatterns	protein_match	370	390	.	+	.	date=18-12-2020;Target=g11770.t1_1 370 390;ID=match$1445_370_390;signature_desc=Zinc finger C2H2 type domain signature.;Name=PS00028;status=T;Dbxref="InterPro:IPR013087"
g11770.t1_1	ProSiteProfiles	protein_match	813	835	12.424	+	.	date=18-12-2020;Target=g11770.t1_1 813 835;ID=match$1446_813_835;signature_desc=Zinc finger C2H2 type domain profile.;Name=PS50157;status=T;Dbxref="InterPro:IPR013087"
g11770.t1_1	ProSiteProfiles	protein_match	424	453	14.752	+	.	date=18-12-2020;Target=g11770.t1_1 424 453;ID=match$1447_424_453;signature_desc=Zinc finger C2H2 type domain profile.;Name=PS50157;status=T;Dbxref="InterPro:IPR013087"
g11770.t1_1	SMART	protein_match	813	835	0.019	+	.	date=18-12-2020;Target=g11770.t1_1 813 835;ID=match$1448_813_835;Name=SM00355;status=T;Dbxref="InterPro:IPR013087"
g11770.t1_1	SMART	protein_match	757	779	2.6E-5	+	.	date=18-12-2020;Target=g11770.t1_1 757 779;ID=match$1448_757_779;Name=SM00355;status=T;Dbxref="InterPro:IPR013087"
g11770.t1_1	SMART	protein_match	424	448	0.011	+	.	date=18-12-2020;Target=g11770.t1_1 424 448;ID=match$1448_424_448;Name=SM00355;status=T;Dbxref="InterPro:IPR013087"
g11770.t1_1	SMART	protein_match	368	390	1.5E-4	+	.	date=18-12-2020;Target=g11770.t1_1 368 390;ID=match$1448_368_390;Name=SM00355;status=T;Dbxref="InterPro:IPR013087"
g11770.t1_1	SMART	protein_match	594	616	0.0062	+	.	date=18-12-2020;Target=g11770.t1_1 594 616;ID=match$1448_594_616;Name=SM00355;status=T;Dbxref="InterPro:IPR013087"
g11770.t1_1	SMART	protein_match	340	362	0.0062	+	.	date=18-12-2020;Target=g11770.t1_1 340 362;ID=match$1448_340_362;Name=SM00355;status=T;Dbxref="InterPro:IPR013087"
g11770.t1_1	SMART	protein_match	729	751	4.1	+	.	date=18-12-2020;Target=g11770.t1_1 729 751;ID=match$1448_729_751;Name=SM00355;status=T;Dbxref="InterPro:IPR013087"
g11770.t1_1	SMART	protein_match	396	418	0.006	+	.	date=18-12-2020;Target=g11770.t1_1 396 418;ID=match$1448_396_418;Name=SM00355;status=T;Dbxref="InterPro:IPR013087"
g11770.t1_1	SMART	protein_match	785	807	0.07	+	.	date=18-12-2020;Target=g11770.t1_1 785 807;ID=match$1448_785_807;Name=SM00355;status=T;Dbxref="InterPro:IPR013087"
g11770.t1_1	ProSitePatterns	protein_match	815	835	.	+	.	date=18-12-2020;Target=g11770.t1_1 815 835;ID=match$1449_815_835;signature_desc=Zinc finger C2H2 type domain signature.;Name=PS00028;status=T;Dbxref="InterPro:IPR013087"
g11770.t1_1	ProSitePatterns	protein_match	596	616	.	+	.	date=18-12-2020;Target=g11770.t1_1 596 616;ID=match$1450_596_616;signature_desc=Zinc finger C2H2 type domain signature.;Name=PS00028;status=T;Dbxref="InterPro:IPR013087"
g11770.t1_1	Gene3D	protein_match	809	836	1.3E-12	+	.	date=18-12-2020;Target=g11770.t1_1 809 836;ID=match$1451_809_836;Name=G3DSA:3.30.160.60;status=T
g11770.t1_1	ProSiteProfiles	protein_match	340	367	15.791	+	.	date=18-12-2020;Target=g11770.t1_1 340 367;ID=match$1452_340_367;signature_desc=Zinc finger C2H2 type domain profile.;Name=PS50157;status=T;Dbxref="InterPro:IPR013087"
g11770.t1_1	ProSiteProfiles	protein_match	757	784	17.828	+	.	date=18-12-2020;Target=g11770.t1_1 757 784;ID=match$1453_757_784;signature_desc=Zinc finger C2H2 type domain profile.;Name=PS50157;status=T;Dbxref="InterPro:IPR013087"
g11770.t1_1	SUPERFAMILY	protein_match	738	794	1.52E-17	+	.	date=18-12-2020;Target=g11770.t1_1 738 794;ID=match$1454_738_794;Name=SSF57667;status=T;Dbxref="InterPro:IPR036236"
g11770.t1_1	Gene3D	protein_match	758	781	1.7E-15	+	.	date=18-12-2020;Target=g11770.t1_1 758 781;ID=match$1455_758_781;Name=G3DSA:3.30.160.60;status=T
g11770.t1_1	PANTHER	protein_match	379	453	4.6E-261	+	.	date=18-12-2020;Target=g11770.t1_1 379 453;ID=match$1456_379_453;Name=PTHR24390;status=T
g11770.t1_1	PANTHER	protein_match	159	392	4.6E-261	+	.	date=18-12-2020;Target=g11770.t1_1 159 392;ID=match$1456_159_392;Name=PTHR24390;status=T
g11770.t1_1	ProSitePatterns	protein_match	398	418	.	+	.	date=18-12-2020;Target=g11770.t1_1 398 418;ID=match$1457_398_418;signature_desc=Zinc finger C2H2 type domain signature.;Name=PS00028;status=T;Dbxref="InterPro:IPR013087"
g15420.t1_1	.	polypeptide	1	257	.	+	.	ID=g15420.t1_1;md5=0aefb4f2cef5a0730845bfc7d28959ba
g15420.t1_1	ProSitePatterns	protein_match	139	159	.	+	.	date=18-12-2020;Target=g15420.t1_1 139 159;ID=match$1458_139_159;signature_desc=Zinc finger C2H2 type domain signature.;Name=PS00028;status=T;Dbxref="InterPro:IPR013087"
g15420.t1_1	ProSitePatterns	protein_match	83	103	.	+	.	date=18-12-2020;Target=g15420.t1_1 83 103;ID=match$1459_83_103;signature_desc=Zinc finger C2H2 type domain signature.;Name=PS00028;status=T;Dbxref="InterPro:IPR013087"
g15420.t1_1	SUPERFAMILY	protein_match	79	131	5.38E-16	+	.	date=18-12-2020;Target=g15420.t1_1 79 131;ID=match$1460_79_131;Name=SSF57667;status=T;Dbxref="InterPro:IPR036236"
g15420.t1_1	Gene3D	protein_match	160	189	2.9E-8	+	.	date=18-12-2020;Target=g15420.t1_1 160 189;ID=match$1461_160_189;Name=G3DSA:3.30.160.60;status=T
g15420.t1_1	Gene3D	protein_match	111	133	2.3E-12	+	.	date=18-12-2020;Target=g15420.t1_1 111 133;ID=match$1462_111_133;Name=G3DSA:3.30.160.60;status=T
g15420.t1_1	Pfam	protein_match	109	131	0.0014	+	.	date=18-12-2020;Target=g15420.t1_1 109 131;ID=match$1463_109_131;signature_desc=Zinc finger, C2H2 type;Name=PF00096;status=T;Dbxref="InterPro:IPR013087"
g15420.t1_1	Pfam	protein_match	165	188	8.4E-4	+	.	date=18-12-2020;Target=g15420.t1_1 165 188;ID=match$1463_165_188;signature_desc=Zinc finger, C2H2 type;Name=PF00096;status=T;Dbxref="InterPro:IPR013087"
g15420.t1_1	Pfam	protein_match	81	103	4.9E-6	+	.	date=18-12-2020;Target=g15420.t1_1 81 103;ID=match$1463_81_103;signature_desc=Zinc finger, C2H2 type;Name=PF00096;status=T;Dbxref="InterPro:IPR013087"
g15420.t1_1	Pfam	protein_match	137	159	2.1E-5	+	.	date=18-12-2020;Target=g15420.t1_1 137 159;ID=match$1463_137_159;signature_desc=Zinc finger, C2H2 type;Name=PF00096;status=T;Dbxref="InterPro:IPR013087"
g15420.t1_1	ProSitePatterns	protein_match	167	188	.	+	.	date=18-12-2020;Target=g15420.t1_1 167 188;ID=match$1464_167_188;signature_desc=Zinc finger C2H2 type domain signature.;Name=PS00028;status=T;Dbxref="InterPro:IPR013087"
g15420.t1_1	Gene3D	protein_match	134	159	2.2E-15	+	.	date=18-12-2020;Target=g15420.t1_1 134 159;ID=match$1465_134_159;Name=G3DSA:3.30.160.60;status=T
g15420.t1_1	Gene3D	protein_match	79	110	6.6E-12	+	.	date=18-12-2020;Target=g15420.t1_1 79 110;ID=match$1466_79_110;Name=G3DSA:3.30.160.60;status=T
g15420.t1_1	SUPERFAMILY	protein_match	118	174	8.76E-20	+	.	date=18-12-2020;Target=g15420.t1_1 118 174;ID=match$1467_118_174;Name=SSF57667;status=T;Dbxref="InterPro:IPR036236"
g15420.t1_1	MobiDBLite	protein_match	39	71	.	+	.	date=18-12-2020;Target=g15420.t1_1 39 71;ID=match$1468_39_71;signature_desc=consensus disorder prediction;Name=mobidb-lite;status=T
g15420.t1_1	ProSitePatterns	protein_match	111	131	.	+	.	date=18-12-2020;Target=g15420.t1_1 111 131;ID=match$1469_111_131;signature_desc=Zinc finger C2H2 type domain signature.;Name=PS00028;status=T;Dbxref="InterPro:IPR013087"
g15420.t1_1	ProSiteProfiles	protein_match	109	136	16.373	+	.	date=18-12-2020;Target=g15420.t1_1 109 136;ID=match$1470_109_136;signature_desc=Zinc finger C2H2 type domain profile.;Name=PS50157;status=T;Dbxref="InterPro:IPR013087"
g15420.t1_1	MobiDBLite	protein_match	39	66	.	+	.	date=18-12-2020;Target=g15420.t1_1 39 66;ID=match$1471_39_66;signature_desc=consensus disorder prediction;Name=mobidb-lite;status=T
g15420.t1_1	PANTHER	protein_match	76	191	7.9E-82	+	.	date=18-12-2020;Target=g15420.t1_1 76 191;ID=match$1472_76_191;Name=PTHR23226;status=T
g15420.t1_1	ProSiteProfiles	protein_match	81	108	15.313	+	.	date=18-12-2020;Target=g15420.t1_1 81 108;ID=match$1473_81_108;signature_desc=Zinc finger C2H2 type domain profile.;Name=PS50157;status=T;Dbxref="InterPro:IPR013087"
g15420.t1_1	ProSiteProfiles	protein_match	165	193	11.032	+	.	date=18-12-2020;Target=g15420.t1_1 165 193;ID=match$1474_165_193;signature_desc=Zinc finger C2H2 type domain profile.;Name=PS50157;status=T;Dbxref="InterPro:IPR013087"
g15420.t1_1	PANTHER	protein_match	76	191	7.9E-82	+	.	date=18-12-2020;Target=g15420.t1_1 76 191;ID=match$1475_76_191;Name=PTHR23226:SF223;status=T
g15420.t1_1	SMART	protein_match	165	188	0.0057	+	.	date=18-12-2020;Target=g15420.t1_1 165 188;ID=match$1476_165_188;Name=SM00355;status=T;Dbxref="InterPro:IPR013087"
g15420.t1_1	SMART	protein_match	81	103	4.7E-4	+	.	date=18-12-2020;Target=g15420.t1_1 81 103;ID=match$1476_81_103;Name=SM00355;status=T;Dbxref="InterPro:IPR013087"
g15420.t1_1	SMART	protein_match	109	131	0.0017	+	.	date=18-12-2020;Target=g15420.t1_1 109 131;ID=match$1476_109_131;Name=SM00355;status=T;Dbxref="InterPro:IPR013087"
g15420.t1_1	SMART	protein_match	137	159	0.01	+	.	date=18-12-2020;Target=g15420.t1_1 137 159;ID=match$1476_137_159;Name=SM00355;status=T;Dbxref="InterPro:IPR013087"
g15420.t1_1	ProSiteProfiles	protein_match	137	164	14.399	+	.	date=18-12-2020;Target=g15420.t1_1 137 164;ID=match$1477_137_164;signature_desc=Zinc finger C2H2 type domain profile.;Name=PS50157;status=T;Dbxref="InterPro:IPR013087"
g16629.t1_1	.	polypeptide	1	245	.	+	.	ID=g16629.t1_1;md5=533ba89e3778b8ab8459b4e49dcd33ca
g16629.t1_1	Gene3D	protein_match	153	228	8.0E-30	+	.	date=18-12-2020;Target=g16629.t1_1 153 228;ID=match$1478_153_228;Name=G3DSA:3.90.1230.10;status=T
g16629.t1_1	Gene3D	protein_match	121	152	2.5E-13	+	.	date=18-12-2020;Target=g16629.t1_1 121 152;ID=match$1479_121_152;Name=G3DSA:3.90.1230.10;status=T
g16629.t1_1	SUPERFAMILY	protein_match	1	244	4.19E-131	+	.	date=18-12-2020;Target=g16629.t1_1 1 244;Ontology_term="GO:0004517","GO:0006809","GO:0055114";ID=match$1480_1_244;Name=SSF56512;status=T;Dbxref="InterPro:IPR036119"
g16629.t1_1	Pfam	protein_match	1	244	5.1E-126	+	.	date=18-12-2020;Target=g16629.t1_1 1 244;Ontology_term="GO:0004517","GO:0006809","GO:0055114";ID=match$1481_1_244;signature_desc=Nitric oxide synthase, oxygenase domain;Name=PF02898;status=T;Dbxref="InterPro:IPR004030"
g16629.t1_1	Gene3D	protein_match	6	120	4.5E-44	+	.	date=18-12-2020;Target=g16629.t1_1 6 120;ID=match$1482_6_120;Name=G3DSA:3.90.440.10;status=T
g16629.t1_1	PANTHER	protein_match	1	244	4.8E-128	+	.	date=18-12-2020;Target=g16629.t1_1 1 244;ID=match$1483_1_244;Name=PTHR43410;status=T
g8489.t1_1	.	polypeptide	1	203	.	+	.	ID=g8489.t1_1;md5=d85c1c693806ccc9e5326b3cde2f2811
g8489.t1_1	Gene3D	protein_match	165	198	1.4E-75	+	.	date=18-12-2020;Target=g8489.t1_1 165 198;ID=match$1484_165_198;Name=G3DSA:3.30.420.40;status=T
g8489.t1_1	Gene3D	protein_match	102	164	1.4E-75	+	.	date=18-12-2020;Target=g8489.t1_1 102 164;ID=match$1485_102_164;Name=G3DSA:3.30.420.40;status=T
g8489.t1_1	SMART	protein_match	1	202	1.4E-41	+	.	date=18-12-2020;Target=g8489.t1_1 1 202;ID=match$1486_1_202;Name=SM00268;status=T;Dbxref="InterPro:IPR004000"
g8489.t1_1	SUPERFAMILY	protein_match	29	202	1.02E-68	+	.	date=18-12-2020;Target=g8489.t1_1 29 202;ID=match$1487_29_202;Name=SSF53067;status=T;Dbxref="InterPro:IPR043129"
g8489.t1_1	SUPERFAMILY	protein_match	1	34	5.18E-10	+	.	date=18-12-2020;Target=g8489.t1_1 1 34;ID=match$1488_1_34;Name=SSF53067;status=T;Dbxref="InterPro:IPR043129"
g8489.t1_1	CDD	protein_match	2	76	0.0032505	+	.	date=18-12-2020;Target=g8489.t1_1 2 76;ID=match$1489_2_76;signature_desc=NBD_sugar-kinase_HSP70_actin;Name=cd00012;status=T
g8489.t1_1	Pfam	protein_match	41	202	7.4E-62	+	.	date=18-12-2020;Target=g8489.t1_1 41 202;ID=match$1490_41_202;signature_desc=Actin;Name=PF00022;status=T;Dbxref="InterPro:IPR004000"
g8489.t1_1	Pfam	protein_match	1	40	5.0E-10	+	.	date=18-12-2020;Target=g8489.t1_1 1 40;ID=match$1490_1_40;signature_desc=Actin;Name=PF00022;status=T;Dbxref="InterPro:IPR004000"
g8489.t1_1	ProSitePatterns	protein_match	183	191	.	+	.	date=18-12-2020;Target=g8489.t1_1 183 191;ID=match$1491_183_191;signature_desc=Actins signature 2.;Name=PS00432;status=T;Dbxref="InterPro:IPR004001"
g8489.t1_1	Gene3D	protein_match	41	101	1.4E-75	+	.	date=18-12-2020;Target=g8489.t1_1 41 101;ID=match$1492_41_101;Name=G3DSA:3.90.640.10;status=T
g8489.t1_1	PANTHER	protein_match	41	201	4.0E-116	+	.	date=18-12-2020;Target=g8489.t1_1 41 201;ID=match$1493_41_201;Name=PTHR11937;status=T;Dbxref="InterPro:IPR004000"
g8489.t1_1	Gene3D	protein_match	1	19	8.7E-15	+	.	date=18-12-2020;Target=g8489.t1_1 1 19;ID=match$1494_1_19;Name=G3DSA:3.30.420.40;status=T
g8489.t1_1	PANTHER	protein_match	41	201	4.0E-116	+	.	date=18-12-2020;Target=g8489.t1_1 41 201;ID=match$1495_41_201;Name=PTHR11937:SF470;status=T
g8489.t1_1	PANTHER	protein_match	1	40	4.0E-116	+	.	date=18-12-2020;Target=g8489.t1_1 1 40;ID=match$1496_1_40;Name=PTHR11937:SF470;status=T
g8489.t1_1	PANTHER	protein_match	1	40	4.0E-116	+	.	date=18-12-2020;Target=g8489.t1_1 1 40;ID=match$1497_1_40;Name=PTHR11937;status=T;Dbxref="InterPro:IPR004000"
g8489.t1_1	Gene3D	protein_match	20	40	8.7E-15	+	.	date=18-12-2020;Target=g8489.t1_1 20 40;ID=match$1498_20_40;Name=G3DSA:3.30.420.40;status=T
g15091.t1_1	.	polypeptide	1	58	.	+	.	ID=g15091.t1_1;md5=d3c032d9bf5b1a76ef8f05dd9b1419f5
g15091.t1_1	MobiDBLite	protein_match	1	33	.	+	.	date=18-12-2020;Target=g15091.t1_1 1 33;ID=match$1499_1_33;signature_desc=consensus disorder prediction;Name=mobidb-lite;status=T
g9402.t1_1	.	polypeptide	1	145	.	+	.	ID=g9402.t1_1;md5=964d06641b9d67cb18627d62e896099f
g9402.t1_1	Coils	protein_match	36	67	.	+	.	date=18-12-2020;Target=g9402.t1_1 36 67;ID=match$1500_36_67;Name=Coil;status=T
g9402.t1_1	Pfam	protein_match	11	137	1.4E-47	+	.	date=18-12-2020;Target=g9402.t1_1 11 137;Ontology_term="GO:0005198","GO:0006886","GO:0016192","GO:0030130","GO:0030132";ID=match$1501_11_137;signature_desc=Clathrin light chain;Name=PF01086;status=T;Dbxref="InterPro:IPR000996"
g9402.t1_1	PANTHER	protein_match	8	140	3.5E-35	+	.	date=18-12-2020;Target=g9402.t1_1 8 140;ID=match$1502_8_140;Name=PTHR10639:SF7;status=T
g9402.t1_1	MobiDBLite	protein_match	1	61	.	+	.	date=18-12-2020;Target=g9402.t1_1 1 61;ID=match$1503_1_61;signature_desc=consensus disorder prediction;Name=mobidb-lite;status=T
g9402.t1_1	MobiDBLite	protein_match	1	24	.	+	.	date=18-12-2020;Target=g9402.t1_1 1 24;ID=match$1504_1_24;signature_desc=consensus disorder prediction;Name=mobidb-lite;status=T
g9402.t1_1	MobiDBLite	protein_match	26	61	.	+	.	date=18-12-2020;Target=g9402.t1_1 26 61;ID=match$1505_26_61;signature_desc=consensus disorder prediction;Name=mobidb-lite;status=T
g9402.t1_1	ProSitePatterns	protein_match	121	134	.	+	.	date=18-12-2020;Target=g9402.t1_1 121 134;Ontology_term="GO:0005198","GO:0006886","GO:0016192","GO:0030130","GO:0030132";ID=match$1506_121_134;signature_desc=Clathrin light chain signature 2.;Name=PS00581;status=T;Dbxref="InterPro:IPR000996"
g9402.t1_1	Coils	protein_match	69	89	.	+	.	date=18-12-2020;Target=g9402.t1_1 69 89;ID=match$1507_69_89;Name=Coil;status=T
g9402.t1_1	PANTHER	protein_match	8	140	3.5E-35	+	.	date=18-12-2020;Target=g9402.t1_1 8 140;Ontology_term="GO:0005198","GO:0006886","GO:0016192","GO:0030130","GO:0030132";ID=match$1508_8_140;Name=PTHR10639;status=T;Dbxref="InterPro:IPR000996"
g16063.t1_1	.	polypeptide	1	111	.	+	.	ID=g16063.t1_1;md5=56d2d064cfe0e8fd3985ee144fc04c03
g16063.t1_1	PANTHER	protein_match	1	83	5.0E-33	+	.	date=18-12-2020;Target=g16063.t1_1 1 83;ID=match$1509_1_83;Name=PTHR11081:SF51;status=T
g16063.t1_1	SUPERFAMILY	protein_match	2	81	1.05E-19	+	.	date=18-12-2020;Target=g16063.t1_1 2 81;ID=match$1510_2_81;Name=SSF88723;status=T;Dbxref="InterPro:IPR029060"
g16063.t1_1	Pfam	protein_match	1	82	1.6E-21	+	.	date=18-12-2020;Target=g16063.t1_1 1 82;Ontology_term="GO:0004518";ID=match$1511_1_82;signature_desc=XPG N-terminal domain;Name=PF00752;status=T;Dbxref="InterPro:IPR006085"
g16063.t1_1	SMART	protein_match	1	92	3.2E-21	+	.	date=18-12-2020;Target=g16063.t1_1 1 92;Ontology_term="GO:0004518";ID=match$1512_1_92;Name=SM00485;status=T;Dbxref="InterPro:IPR006085"
g16063.t1_1	PANTHER	protein_match	1	83	5.0E-33	+	.	date=18-12-2020;Target=g16063.t1_1 1 83;ID=match$1513_1_83;Name=PTHR11081;status=T;Dbxref="InterPro:IPR006084"
g16063.t1_1	Gene3D	protein_match	1	85	3.6E-27	+	.	date=18-12-2020;Target=g16063.t1_1 1 85;ID=match$1514_1_85;Name=G3DSA:3.40.50.1010;status=T
g10671.t1_1	.	polypeptide	1	1215	.	+	.	ID=g10671.t1_1;md5=199da8adbbd6f984998c36e12f405424
g10671.t1_1	MobiDBLite	protein_match	1131	1215	.	+	.	date=18-12-2020;Target=g10671.t1_1 1131 1215;ID=match$1515_1131_1215;signature_desc=consensus disorder prediction;Name=mobidb-lite;status=T
g10671.t1_1	MobiDBLite	protein_match	561	710	.	+	.	date=18-12-2020;Target=g10671.t1_1 561 710;ID=match$1516_561_710;signature_desc=consensus disorder prediction;Name=mobidb-lite;status=T
g10671.t1_1	MobiDBLite	protein_match	637	694	.	+	.	date=18-12-2020;Target=g10671.t1_1 637 694;ID=match$1517_637_694;signature_desc=consensus disorder prediction;Name=mobidb-lite;status=T
g10671.t1_1	MobiDBLite	protein_match	753	840	.	+	.	date=18-12-2020;Target=g10671.t1_1 753 840;ID=match$1518_753_840;signature_desc=consensus disorder prediction;Name=mobidb-lite;status=T
g10671.t1_1	Gene3D	protein_match	161	324	7.7E-56	+	.	date=18-12-2020;Target=g10671.t1_1 161 324;ID=match$1519_161_324;Name=G3DSA:3.40.50.11500;status=T;Dbxref="InterPro:IPR043153"
g10671.t1_1	PANTHER	protein_match	5	920	3.3E-145	+	.	date=18-12-2020;Target=g10671.t1_1 5 920;ID=match$1520_5_920;Name=PTHR13196:SF14;status=T
g10671.t1_1	Pfam	protein_match	334	375	1.8E-10	+	.	date=18-12-2020;Target=g10671.t1_1 334 375;ID=match$1521_334_375;signature_desc=dDENN domain;Name=PF03455;status=T;Dbxref="InterPro:IPR005112"
g10671.t1_1	PANTHER	protein_match	5	920	3.3E-145	+	.	date=18-12-2020;Target=g10671.t1_1 5 920;Ontology_term="GO:0005085";ID=match$1522_5_920;Name=PTHR13196;status=T;Dbxref="InterPro:IPR040032"
g10671.t1_1	SMART	protein_match	87	272	1.2E-65	+	.	date=18-12-2020;Target=g10671.t1_1 87 272;ID=match$1523_87_272;Name=SM00799;status=T;Dbxref="InterPro:IPR001194"
g10671.t1_1	MobiDBLite	protein_match	906	1016	.	+	.	date=18-12-2020;Target=g10671.t1_1 906 1016;ID=match$1524_906_1016;signature_desc=consensus disorder prediction;Name=mobidb-lite;status=T
g10671.t1_1	Pfam	protein_match	88	271	6.8E-54	+	.	date=18-12-2020;Target=g10671.t1_1 88 271;ID=match$1525_88_271;signature_desc=DENN (AEX-3) domain;Name=PF02141;status=T;Dbxref="InterPro:IPR001194"
g10671.t1_1	MobiDBLite	protein_match	1072	1099	.	+	.	date=18-12-2020;Target=g10671.t1_1 1072 1099;ID=match$1526_1072_1099;signature_desc=consensus disorder prediction;Name=mobidb-lite;status=T
g10671.t1_1	SMART	protein_match	9	84	1.1E-16	+	.	date=18-12-2020;Target=g10671.t1_1 9 84;ID=match$1527_9_84;Name=SM00800;status=T;Dbxref="InterPro:IPR005113"
g10671.t1_1	MobiDBLite	protein_match	882	901	.	+	.	date=18-12-2020;Target=g10671.t1_1 882 901;ID=match$1528_882_901;signature_desc=consensus disorder prediction;Name=mobidb-lite;status=T
g10671.t1_1	MobiDBLite	protein_match	561	624	.	+	.	date=18-12-2020;Target=g10671.t1_1 561 624;ID=match$1529_561_624;signature_desc=consensus disorder prediction;Name=mobidb-lite;status=T
g10671.t1_1	MobiDBLite	protein_match	929	944	.	+	.	date=18-12-2020;Target=g10671.t1_1 929 944;ID=match$1530_929_944;signature_desc=consensus disorder prediction;Name=mobidb-lite;status=T
g10671.t1_1	MobiDBLite	protein_match	484	500	.	+	.	date=18-12-2020;Target=g10671.t1_1 484 500;ID=match$1531_484_500;signature_desc=consensus disorder prediction;Name=mobidb-lite;status=T
g10671.t1_1	MobiDBLite	protein_match	814	830	.	+	.	date=18-12-2020;Target=g10671.t1_1 814 830;ID=match$1532_814_830;signature_desc=consensus disorder prediction;Name=mobidb-lite;status=T
g10671.t1_1	MobiDBLite	protein_match	954	997	.	+	.	date=18-12-2020;Target=g10671.t1_1 954 997;ID=match$1533_954_997;signature_desc=consensus disorder prediction;Name=mobidb-lite;status=T
g10671.t1_1	Pfam	protein_match	32	83	4.1E-7	+	.	date=18-12-2020;Target=g10671.t1_1 32 83;ID=match$1534_32_83;signature_desc=uDENN domain;Name=PF03456;status=T;Dbxref="InterPro:IPR005113"
g10671.t1_1	SMART	protein_match	303	367	2.1E-19	+	.	date=18-12-2020;Target=g10671.t1_1 303 367;ID=match$1535_303_367;Name=SM00801;status=T;Dbxref="InterPro:IPR005112"
g10671.t1_1	Gene3D	protein_match	1	139	9.9E-41	+	.	date=18-12-2020;Target=g10671.t1_1 1 139;ID=match$1536_1_139;Name=G3DSA:3.30.450.200;status=T
g10671.t1_1	ProSiteProfiles	protein_match	14	374	44.384	+	.	date=18-12-2020;Target=g10671.t1_1 14 374;ID=match$1537_14_374;signature_desc=Tripartite DENN domain profile.;Name=PS50211;status=T;Dbxref="InterPro:IPR037516"
g10671.t1_1	MobiDBLite	protein_match	424	543	.	+	.	date=18-12-2020;Target=g10671.t1_1 424 543;ID=match$1538_424_543;signature_desc=consensus disorder prediction;Name=mobidb-lite;status=T
g3254.t1_1	.	polypeptide	1	349	.	+	.	ID=g3254.t1_1;md5=352c4e7eebf00ddcbd7bb67e421f99fe
g3254.t1_1	MobiDBLite	protein_match	307	349	.	+	.	date=18-12-2020;Target=g3254.t1_1 307 349;ID=match$1539_307_349;signature_desc=consensus disorder prediction;Name=mobidb-lite;status=T
g15615.t1_1	.	polypeptide	1	104	.	+	.	ID=g15615.t1_1;md5=e8e5fa3d2f0c56e3721d5b81f1cd4799
g15615.t1_1	MobiDBLite	protein_match	66	87	.	+	.	date=18-12-2020;Target=g15615.t1_1 66 87;ID=match$1540_66_87;signature_desc=consensus disorder prediction;Name=mobidb-lite;status=T
g16161.t1_1	.	polypeptide	1	772	.	+	.	ID=g16161.t1_1;md5=aa439919338a69e0416bf4ee329b0c43
g16161.t1_1	PANTHER	protein_match	11	373	1.1E-298	+	.	date=18-12-2020;Target=g16161.t1_1 11 373;Ontology_term="GO:0016021";ID=match$1541_11_373;Name=PTHR11616;status=T;Dbxref="InterPro:IPR000175"
g16161.t1_1	SUPERFAMILY	protein_match	17	372	4.97E-108	+	.	date=18-12-2020;Target=g16161.t1_1 17 372;ID=match$1542_17_372;Name=SSF161070;status=T;Dbxref="InterPro:IPR037272"
g16161.t1_1	PANTHER	protein_match	374	634	1.1E-298	+	.	date=18-12-2020;Target=g16161.t1_1 374 634;Ontology_term="GO:0016021";ID=match$1543_374_634;Name=PTHR11616;status=T;Dbxref="InterPro:IPR000175"
g16161.t1_1	SUPERFAMILY	protein_match	374	604	1.57E-46	+	.	date=18-12-2020;Target=g16161.t1_1 374 604;ID=match$1544_374_604;Name=SSF161070;status=T;Dbxref="InterPro:IPR037272"
g16161.t1_1	PANTHER	protein_match	687	730	1.1E-298	+	.	date=18-12-2020;Target=g16161.t1_1 687 730;Ontology_term="GO:0016021";ID=match$1545_687_730;Name=PTHR11616;status=T;Dbxref="InterPro:IPR000175"
g16161.t1_1	MobiDBLite	protein_match	681	704	.	+	.	date=18-12-2020;Target=g16161.t1_1 681 704;ID=match$1546_681_704;signature_desc=consensus disorder prediction;Name=mobidb-lite;status=T
g16161.t1_1	PRINTS	protein_match	222	239	1.1E-43	+	.	date=18-12-2020;Target=g16161.t1_1 222 239;Ontology_term="GO:0016021";ID=match$1547_222_239;signature_desc=Sodium/chloride neurotransmitter symporter signature;Name=PR00176;status=T;Dbxref="InterPro:IPR000175"
g16161.t1_1	PRINTS	protein_match	304	324	1.1E-43	+	.	date=18-12-2020;Target=g16161.t1_1 304 324;Ontology_term="GO:0016021";ID=match$1547_304_324;signature_desc=Sodium/chloride neurotransmitter symporter signature;Name=PR00176;status=T;Dbxref="InterPro:IPR000175"
g16161.t1_1	PRINTS	protein_match	97	123	1.1E-43	+	.	date=18-12-2020;Target=g16161.t1_1 97 123;Ontology_term="GO:0016021";ID=match$1547_97_123;signature_desc=Sodium/chloride neurotransmitter symporter signature;Name=PR00176;status=T;Dbxref="InterPro:IPR000175"
g16161.t1_1	PRINTS	protein_match	25	46	1.1E-43	+	.	date=18-12-2020;Target=g16161.t1_1 25 46;Ontology_term="GO:0016021";ID=match$1547_25_46;signature_desc=Sodium/chloride neurotransmitter symporter signature;Name=PR00176;status=T;Dbxref="InterPro:IPR000175"
g16161.t1_1	PRINTS	protein_match	550	570	1.1E-43	+	.	date=18-12-2020;Target=g16161.t1_1 550 570;Ontology_term="GO:0016021";ID=match$1547_550_570;signature_desc=Sodium/chloride neurotransmitter symporter signature;Name=PR00176;status=T;Dbxref="InterPro:IPR000175"
g16161.t1_1	PRINTS	protein_match	54	73	1.1E-43	+	.	date=18-12-2020;Target=g16161.t1_1 54 73;Ontology_term="GO:0016021";ID=match$1547_54_73;signature_desc=Sodium/chloride neurotransmitter symporter signature;Name=PR00176;status=T;Dbxref="InterPro:IPR000175"
g16161.t1_1	PRINTS	protein_match	510	530	1.1E-43	+	.	date=18-12-2020;Target=g16161.t1_1 510 530;Ontology_term="GO:0016021";ID=match$1547_510_530;signature_desc=Sodium/chloride neurotransmitter symporter signature;Name=PR00176;status=T;Dbxref="InterPro:IPR000175"
g16161.t1_1	MobiDBLite	protein_match	681	709	.	+	.	date=18-12-2020;Target=g16161.t1_1 681 709;ID=match$1548_681_709;signature_desc=consensus disorder prediction;Name=mobidb-lite;status=T
g16161.t1_1	PANTHER	protein_match	11	373	1.1E-298	+	.	date=18-12-2020;Target=g16161.t1_1 11 373;ID=match$1549_11_373;Name=PTHR11616:SF269;status=T
g16161.t1_1	PANTHER	protein_match	687	730	1.1E-298	+	.	date=18-12-2020;Target=g16161.t1_1 687 730;ID=match$1549_687_730;Name=PTHR11616:SF269;status=T
g16161.t1_1	MobiDBLite	protein_match	739	759	.	+	.	date=18-12-2020;Target=g16161.t1_1 739 759;ID=match$1550_739_759;signature_desc=consensus disorder prediction;Name=mobidb-lite;status=T
g16161.t1_1	ProSitePatterns	protein_match	41	55	.	+	.	date=18-12-2020;Target=g16161.t1_1 41 55;Ontology_term="GO:0016021";ID=match$1551_41_55;signature_desc=Sodium:neurotransmitter symporter family signature 1.;Name=PS00610;status=T;Dbxref="InterPro:IPR000175"
g16161.t1_1	ProSiteProfiles	protein_match	16	609	74.512	+	.	date=18-12-2020;Target=g16161.t1_1 16 609;Ontology_term="GO:0016021";ID=match$1552_16_609;signature_desc=Sodium:neurotransmitter symporter family profile.;Name=PS50267;status=T;Dbxref="InterPro:IPR000175"
g16161.t1_1	ProSitePatterns	protein_match	123	143	.	+	.	date=18-12-2020;Target=g16161.t1_1 123 143;Ontology_term="GO:0016021";ID=match$1553_123_143;signature_desc=Sodium:neurotransmitter symporter family signature 2.;Name=PS00754;status=T;Dbxref="InterPro:IPR000175"
g16161.t1_1	CDD	protein_match	18	569	6.59016E-154	+	.	date=18-12-2020;Target=g16161.t1_1 18 569;ID=match$1554_18_569;signature_desc=SLC6sbd;Name=cd10324;status=T
g16161.t1_1	Pfam	protein_match	17	372	1.6E-110	+	.	date=18-12-2020;Target=g16161.t1_1 17 372;Ontology_term="GO:0016021";ID=match$1555_17_372;signature_desc=Sodium:neurotransmitter symporter family;Name=PF00209;status=T;Dbxref="InterPro:IPR000175"
g16161.t1_1	Pfam	protein_match	374	605	4.0E-44	+	.	date=18-12-2020;Target=g16161.t1_1 374 605;Ontology_term="GO:0016021";ID=match$1555_374_605;signature_desc=Sodium:neurotransmitter symporter family;Name=PF00209;status=T;Dbxref="InterPro:IPR000175"
g16161.t1_1	PANTHER	protein_match	374	634	1.1E-298	+	.	date=18-12-2020;Target=g16161.t1_1 374 634;ID=match$1556_374_634;Name=PTHR11616:SF269;status=T
g12268.t1_1	.	polypeptide	1	562	.	+	.	ID=g12268.t1_1;md5=5ce6823b9437634f2f059a889da0e6fd
g12268.t1_1	MobiDBLite	protein_match	186	265	.	+	.	date=18-12-2020;Target=g12268.t1_1 186 265;ID=match$1557_186_265;signature_desc=consensus disorder prediction;Name=mobidb-lite;status=T
g12268.t1_1	PANTHER	protein_match	491	561	5.0E-39	+	.	date=18-12-2020;Target=g12268.t1_1 491 561;ID=match$1558_491_561;Name=PTHR23235:SF46;status=T
g12268.t1_1	SMART	protein_match	530	554	7.7E-4	+	.	date=18-12-2020;Target=g12268.t1_1 530 554;ID=match$1559_530_554;Name=SM00355;status=T;Dbxref="InterPro:IPR013087"
g12268.t1_1	SMART	protein_match	500	524	0.03	+	.	date=18-12-2020;Target=g12268.t1_1 500 524;ID=match$1559_500_524;Name=SM00355;status=T;Dbxref="InterPro:IPR013087"
g12268.t1_1	Gene3D	protein_match	524	561	3.6E-14	+	.	date=18-12-2020;Target=g12268.t1_1 524 561;ID=match$1560_524_561;Name=G3DSA:3.30.160.60;status=T
g12268.t1_1	MobiDBLite	protein_match	398	492	.	+	.	date=18-12-2020;Target=g12268.t1_1 398 492;ID=match$1561_398_492;signature_desc=consensus disorder prediction;Name=mobidb-lite;status=T
g12268.t1_1	MobiDBLite	protein_match	250	265	.	+	.	date=18-12-2020;Target=g12268.t1_1 250 265;ID=match$1562_250_265;signature_desc=consensus disorder prediction;Name=mobidb-lite;status=T
g12268.t1_1	ProSiteProfiles	protein_match	500	529	15.147	+	.	date=18-12-2020;Target=g12268.t1_1 500 529;ID=match$1563_500_529;signature_desc=Zinc finger C2H2 type domain profile.;Name=PS50157;status=T;Dbxref="InterPro:IPR013087"
g12268.t1_1	SUPERFAMILY	protein_match	511	561	5.46E-15	+	.	date=18-12-2020;Target=g12268.t1_1 511 561;ID=match$1564_511_561;Name=SSF57667;status=T;Dbxref="InterPro:IPR036236"
g12268.t1_1	MobiDBLite	protein_match	316	335	.	+	.	date=18-12-2020;Target=g12268.t1_1 316 335;ID=match$1565_316_335;signature_desc=consensus disorder prediction;Name=mobidb-lite;status=T
g12268.t1_1	ProSiteProfiles	protein_match	530	559	12.902	+	.	date=18-12-2020;Target=g12268.t1_1 530 559;ID=match$1566_530_559;signature_desc=Zinc finger C2H2 type domain profile.;Name=PS50157;status=T;Dbxref="InterPro:IPR013087"
g12268.t1_1	MobiDBLite	protein_match	186	217	.	+	.	date=18-12-2020;Target=g12268.t1_1 186 217;ID=match$1567_186_217;signature_desc=consensus disorder prediction;Name=mobidb-lite;status=T
g12268.t1_1	ProSitePatterns	protein_match	532	554	.	+	.	date=18-12-2020;Target=g12268.t1_1 532 554;ID=match$1568_532_554;signature_desc=Zinc finger C2H2 type domain signature.;Name=PS00028;status=T;Dbxref="InterPro:IPR013087"
g12268.t1_1	MobiDBLite	protein_match	416	459	.	+	.	date=18-12-2020;Target=g12268.t1_1 416 459;ID=match$1569_416_459;signature_desc=consensus disorder prediction;Name=mobidb-lite;status=T
g12268.t1_1	ProSitePatterns	protein_match	502	524	.	+	.	date=18-12-2020;Target=g12268.t1_1 502 524;ID=match$1570_502_524;signature_desc=Zinc finger C2H2 type domain signature.;Name=PS00028;status=T;Dbxref="InterPro:IPR013087"
g12268.t1_1	PANTHER	protein_match	491	561	5.0E-39	+	.	date=18-12-2020;Target=g12268.t1_1 491 561;ID=match$1571_491_561;Name=PTHR23235;status=T
g12268.t1_1	Gene3D	protein_match	501	523	2.4E-10	+	.	date=18-12-2020;Target=g12268.t1_1 501 523;ID=match$1572_501_523;Name=G3DSA:3.30.160.60;status=T
g2594.t1_1	.	polypeptide	1	180	.	+	.	ID=g2594.t1_1;md5=443b59fefd7dc67e5131ea1added3fc1
g2594.t1_1	ProSitePatterns	protein_match	160	174	.	+	.	date=18-12-2020;Target=g2594.t1_1 160 174;ID=match$1573_160_174;signature_desc=Trp-Asp (WD) repeats signature.;Name=PS00678;status=T;Dbxref="InterPro:IPR019775"
g2594.t1_1	Coils	protein_match	69	69	.	+	.	date=18-12-2020;Target=g2594.t1_1 69 69;ID=match$1574_69_69;Name=Coil;status=T
g15672.t1_1	.	polypeptide	1	597	.	+	.	ID=g15672.t1_1;md5=3e7c30a3d63ab3225fedcff416c3dc51
g15672.t1_1	Pfam	protein_match	393	585	1.5E-71	+	.	date=18-12-2020;Target=g15672.t1_1 393 585;ID=match$1575_393_585;signature_desc=D-glucuronyl C5-epimerase C-terminus;Name=PF06662;status=T;Dbxref="InterPro:IPR010598"
g15672.t1_1	PANTHER	protein_match	29	596	2.8E-233	+	.	date=18-12-2020;Target=g15672.t1_1 29 596;Ontology_term="GO:0015012","GO:0047464";ID=match$1576_29_596;Name=PTHR13174;status=T;Dbxref="InterPro:IPR039721"
g15680.t1_1	.	polypeptide	1	397	.	+	.	ID=g15680.t1_1;md5=e08478c12e6debdcbc9a927ae2e81488
g15680.t1_1	PANTHER	protein_match	2	229	9.5E-45	+	.	date=18-12-2020;Target=g15680.t1_1 2 229;ID=match$1577_2_229;Name=PTHR13115;status=T
g15680.t1_1	PANTHER	protein_match	2	229	9.5E-45	+	.	date=18-12-2020;Target=g15680.t1_1 2 229;ID=match$1578_2_229;Name=PTHR13115:SF8;status=T
g15680.t1_1	MobiDBLite	protein_match	118	179	.	+	.	date=18-12-2020;Target=g15680.t1_1 118 179;ID=match$1579_118_179;signature_desc=consensus disorder prediction;Name=mobidb-lite;status=T
g15680.t1_1	Coils	protein_match	102	122	.	+	.	date=18-12-2020;Target=g15680.t1_1 102 122;ID=match$1580_102_122;Name=Coil;status=T
g15680.t1_1	Gene3D	protein_match	287	396	2.2E-31	+	.	date=18-12-2020;Target=g15680.t1_1 287 396;ID=match$1581_287_396;Name=G3DSA:3.40.20.10;status=T;Dbxref="InterPro:IPR029006"
g15680.t1_1	SUPERFAMILY	protein_match	309	391	2.71E-24	+	.	date=18-12-2020;Target=g15680.t1_1 309 391;ID=match$1582_309_391;Name=SSF55753;status=T
g15680.t1_1	ProSiteProfiles	protein_match	245	391	18.342	+	.	date=18-12-2020;Target=g15680.t1_1 245 391;Ontology_term="GO:0003779";ID=match$1583_245_391;signature_desc=ADF-H domain profile.;Name=PS51263;status=T;Dbxref="InterPro:IPR002108"
g15680.t1_1	Coils	protein_match	55	82	.	+	.	date=18-12-2020;Target=g15680.t1_1 55 82;ID=match$1584_55_82;Name=Coil;status=T
g15680.t1_1	MobiDBLite	protein_match	118	146	.	+	.	date=18-12-2020;Target=g15680.t1_1 118 146;ID=match$1585_118_146;signature_desc=consensus disorder prediction;Name=mobidb-lite;status=T
g15680.t1_1	CDD	protein_match	299	390	5.19429E-36	+	.	date=18-12-2020;Target=g15680.t1_1 299 390;Ontology_term="GO:0015629","GO:0030042";ID=match$1586_299_390;signature_desc=ADF_cofilin_like;Name=cd11286;status=T;Dbxref="InterPro:IPR017904"
g15680.t1_1	Pfam	protein_match	309	389	8.0E-23	+	.	date=18-12-2020;Target=g15680.t1_1 309 389;Ontology_term="GO:0003779";ID=match$1587_309_389;signature_desc=Cofilin/tropomyosin-type actin-binding protein;Name=PF00241;status=T;Dbxref="InterPro:IPR002108"
g15680.t1_1	SMART	protein_match	270	391	7.4E-25	+	.	date=18-12-2020;Target=g15680.t1_1 270 391;Ontology_term="GO:0003779";ID=match$1588_270_391;Name=SM00102;status=T;Dbxref="InterPro:IPR002108"
g18014.t1_1	.	polypeptide	1	225	.	+	.	ID=g18014.t1_1;md5=8981687acd51baa2f559b9b430a3fd10
g18014.t1_1	Pfam	protein_match	130	212	2.4E-21	+	.	date=18-12-2020;Target=g18014.t1_1 130 212;ID=match$1589_130_212;signature_desc=DM4/DM12 family;Name=PF07841;status=T;Dbxref="InterPro:IPR006631"
g18014.t1_1	PANTHER	protein_match	9	222	1.3E-75	+	.	date=18-12-2020;Target=g18014.t1_1 9 222;ID=match$1590_9_222;Name=PTHR21398:SF20;status=T
g18014.t1_1	PANTHER	protein_match	9	222	1.3E-75	+	.	date=18-12-2020;Target=g18014.t1_1 9 222;ID=match$1591_9_222;Name=PTHR21398;status=T
g18014.t1_1	SMART	protein_match	125	219	2.4E-22	+	.	date=18-12-2020;Target=g18014.t1_1 125 219;ID=match$1592_125_219;Name=SM00718;status=T;Dbxref="InterPro:IPR006631"
g12373.t1_1	.	polypeptide	1	445	.	+	.	ID=g12373.t1_1;md5=5bf86e3e65cdc328c788060b822cf48d
g12373.t1_1	Pfam	protein_match	184	423	1.4E-11	+	.	date=18-12-2020;Target=g12373.t1_1 184 423;Ontology_term="GO:0016021","GO:0050909";ID=match$1593_184_423;signature_desc=7tm Chemosensory receptor;Name=PF08395;status=T;Dbxref="InterPro:IPR013604"
g12373.t1_1	PANTHER	protein_match	185	421	9.1E-13	+	.	date=18-12-2020;Target=g12373.t1_1 185 421;Ontology_term="GO:0016021","GO:0050909";ID=match$1594_185_421;Name=PTHR21143;status=T;Dbxref="InterPro:IPR013604"
g926.t1_1	.	polypeptide	1	1010	.	+	.	ID=g926.t1_1;md5=42c80c578e9203434cb37da5cc77d048
g926.t1_1	ProSiteProfiles	protein_match	595	626	9.305	+	.	date=18-12-2020;Target=g926.t1_1 595 626;Ontology_term="GO:0005515";ID=match$1595_595_626;signature_desc=Trp-Asp (WD) repeats profile.;Name=PS50082;status=T;Dbxref="InterPro:IPR001680"
g926.t1_1	ProSiteProfiles	protein_match	694	914	20.883	+	.	date=18-12-2020;Target=g926.t1_1 694 914;Ontology_term="GO:0005515";ID=match$1596_694_914;signature_desc=Trp-Asp (WD) repeats circular profile.;Name=PS50294;status=T;Dbxref="InterPro:IPR017986"
g926.t1_1	SUPERFAMILY	protein_match	594	947	6.54E-53	+	.	date=18-12-2020;Target=g926.t1_1 594 947;Ontology_term="GO:0005515";ID=match$1597_594_947;Name=SSF50978;status=T;Dbxref="InterPro:IPR036322"
g926.t1_1	SMART	protein_match	687	725	3.2E-6	+	.	date=18-12-2020;Target=g926.t1_1 687 725;Ontology_term="GO:0005515";ID=match$1598_687_725;Name=SM00320;status=T;Dbxref="InterPro:IPR001680"
g926.t1_1	SMART	protein_match	587	627	1.9E-5	+	.	date=18-12-2020;Target=g926.t1_1 587 627;Ontology_term="GO:0005515";ID=match$1598_587_627;Name=SM00320;status=T;Dbxref="InterPro:IPR001680"
g926.t1_1	SMART	protein_match	866	905	0.39	+	.	date=18-12-2020;Target=g926.t1_1 866 905;Ontology_term="GO:0005515";ID=match$1598_866_905;Name=SM00320;status=T;Dbxref="InterPro:IPR001680"
g926.t1_1	SMART	protein_match	819	861	45.0	+	.	date=18-12-2020;Target=g926.t1_1 819 861;Ontology_term="GO:0005515";ID=match$1598_819_861;Name=SM00320;status=T;Dbxref="InterPro:IPR001680"
g926.t1_1	SMART	protein_match	728	767	1.6E-8	+	.	date=18-12-2020;Target=g926.t1_1 728 767;Ontology_term="GO:0005515";ID=match$1598_728_767;Name=SM00320;status=T;Dbxref="InterPro:IPR001680"
g926.t1_1	SMART	protein_match	769	811	1.0	+	.	date=18-12-2020;Target=g926.t1_1 769 811;Ontology_term="GO:0005515";ID=match$1598_769_811;Name=SM00320;status=T;Dbxref="InterPro:IPR001680"
g926.t1_1	MobiDBLite	protein_match	84	110	.	+	.	date=18-12-2020;Target=g926.t1_1 84 110;ID=match$1599_84_110;signature_desc=consensus disorder prediction;Name=mobidb-lite;status=T
g926.t1_1	MobiDBLite	protein_match	646	680	.	+	.	date=18-12-2020;Target=g926.t1_1 646 680;ID=match$1600_646_680;signature_desc=consensus disorder prediction;Name=mobidb-lite;status=T
g926.t1_1	ProSiteProfiles	protein_match	734	768	11.478	+	.	date=18-12-2020;Target=g926.t1_1 734 768;Ontology_term="GO:0005515";ID=match$1601_734_768;signature_desc=Trp-Asp (WD) repeats profile.;Name=PS50082;status=T;Dbxref="InterPro:IPR001680"
g926.t1_1	MobiDBLite	protein_match	84	282	.	+	.	date=18-12-2020;Target=g926.t1_1 84 282;ID=match$1602_84_282;signature_desc=consensus disorder prediction;Name=mobidb-lite;status=T
g926.t1_1	ProSiteProfiles	protein_match	694	727	11.979	+	.	date=18-12-2020;Target=g926.t1_1 694 727;Ontology_term="GO:0005515";ID=match$1603_694_727;signature_desc=Trp-Asp (WD) repeats profile.;Name=PS50082;status=T;Dbxref="InterPro:IPR001680"
g926.t1_1	MobiDBLite	protein_match	479	517	.	+	.	date=18-12-2020;Target=g926.t1_1 479 517;ID=match$1604_479_517;signature_desc=consensus disorder prediction;Name=mobidb-lite;status=T
g926.t1_1	PANTHER	protein_match	426	995	1.8E-231	+	.	date=18-12-2020;Target=g926.t1_1 426 995;ID=match$1605_426_995;Name=PTHR14221:SF53;status=T
g926.t1_1	MobiDBLite	protein_match	155	282	.	+	.	date=18-12-2020;Target=g926.t1_1 155 282;ID=match$1606_155_282;signature_desc=consensus disorder prediction;Name=mobidb-lite;status=T
g926.t1_1	PANTHER	protein_match	426	995	1.8E-231	+	.	date=18-12-2020;Target=g926.t1_1 426 995;ID=match$1607_426_995;Name=PTHR14221;status=T;Dbxref="InterPro:IPR040324"
g926.t1_1	MobiDBLite	protein_match	646	661	.	+	.	date=18-12-2020;Target=g926.t1_1 646 661;ID=match$1608_646_661;signature_desc=consensus disorder prediction;Name=mobidb-lite;status=T
g926.t1_1	ProSiteProfiles	protein_match	595	636	8.835	+	.	date=18-12-2020;Target=g926.t1_1 595 636;Ontology_term="GO:0005515";ID=match$1609_595_636;signature_desc=Trp-Asp (WD) repeats circular profile.;Name=PS50294;status=T;Dbxref="InterPro:IPR017986"
g926.t1_1	Pfam	protein_match	881	905	0.04	+	.	date=18-12-2020;Target=g926.t1_1 881 905;Ontology_term="GO:0005515";ID=match$1610_881_905;signature_desc=WD domain, G-beta repeat;Name=PF00400;status=T;Dbxref="InterPro:IPR001680"
g926.t1_1	Pfam	protein_match	597	626	0.0035	+	.	date=18-12-2020;Target=g926.t1_1 597 626;Ontology_term="GO:0005515";ID=match$1610_597_626;signature_desc=WD domain, G-beta repeat;Name=PF00400;status=T;Dbxref="InterPro:IPR001680"
g926.t1_1	Pfam	protein_match	692	724	4.8E-4	+	.	date=18-12-2020;Target=g926.t1_1 692 724;Ontology_term="GO:0005515";ID=match$1610_692_724;signature_desc=WD domain, G-beta repeat;Name=PF00400;status=T;Dbxref="InterPro:IPR001680"
g926.t1_1	Pfam	protein_match	730	767	0.0011	+	.	date=18-12-2020;Target=g926.t1_1 730 767;Ontology_term="GO:0005515";ID=match$1610_730_767;signature_desc=WD domain, G-beta repeat;Name=PF00400;status=T;Dbxref="InterPro:IPR001680"
g11282.t1_1	.	polypeptide	1	230	.	+	.	ID=g11282.t1_1;md5=0323e2b9802cc6e916ce2f4d6d5c49b6
g11282.t1_1	Gene3D	protein_match	94	115	3.4E-11	+	.	date=18-12-2020;Target=g11282.t1_1 94 115;ID=match$1611_94_115;Name=G3DSA:3.40.50.2300;status=T
g11282.t1_1	SUPERFAMILY	protein_match	145	199	4.02E-5	+	.	date=18-12-2020;Target=g11282.t1_1 145 199;ID=match$1612_145_199;Name=SSF53850;status=T
g11282.t1_1	Pfam	protein_match	145	194	2.6E-8	+	.	date=18-12-2020;Target=g11282.t1_1 145 194;Ontology_term="GO:0004970","GO:0016020";ID=match$1613_145_194;signature_desc=Ligated ion channel L-glutamate- and glycine-binding site;Name=PF10613;status=T;Dbxref="InterPro:IPR019594"
g11282.t1_1	Gene3D	protein_match	116	136	3.4E-11	+	.	date=18-12-2020;Target=g11282.t1_1 116 136;ID=match$1614_116_136;Name=G3DSA:3.40.50.2300;status=T
g11282.t1_1	Gene3D	protein_match	144	202	3.0E-12	+	.	date=18-12-2020;Target=g11282.t1_1 144 202;ID=match$1615_144_202;Name=G3DSA:3.40.190.10;status=T
g11282.t1_1	SMART	protein_match	155	203	0.0045	+	.	date=18-12-2020;Target=g11282.t1_1 155 203;Ontology_term="GO:0004970","GO:0016020";ID=match$1616_155_203;Name=SM00918;status=T;Dbxref="InterPro:IPR019594"
g15664.t1_1	.	polypeptide	1	74	.	+	.	ID=g15664.t1_1;md5=7d85dc8ac4457deb315aec45a3b4dd1c
g15664.t1_1	MobiDBLite	protein_match	1	74	.	+	.	date=18-12-2020;Target=g15664.t1_1 1 74;ID=match$1617_1_74;signature_desc=consensus disorder prediction;Name=mobidb-lite;status=T
g5796.t1_1	.	polypeptide	1	143	.	+	.	ID=g5796.t1_1;md5=780a34249ddf10ca511d192e68e7b405
g5796.t1_1	PANTHER	protein_match	65	136	3.6E-14	+	.	date=18-12-2020;Target=g5796.t1_1 65 136;ID=match$1618_65_136;Name=PTHR36694:SF6;status=T
g5796.t1_1	PANTHER	protein_match	65	136	3.6E-14	+	.	date=18-12-2020;Target=g5796.t1_1 65 136;ID=match$1619_65_136;Name=PTHR36694;status=T
g5796.t1_1	PANTHER	protein_match	17	54	3.6E-14	+	.	date=18-12-2020;Target=g5796.t1_1 17 54;ID=match$1619_17_54;Name=PTHR36694;status=T
g5796.t1_1	PANTHER	protein_match	17	54	3.6E-14	+	.	date=18-12-2020;Target=g5796.t1_1 17 54;ID=match$1620_17_54;Name=PTHR36694:SF6;status=T
g1836.t1_1	.	polypeptide	1	62	.	+	.	ID=g1836.t1_1;md5=3a1102782571d65aa5482a648742a057
g1836.t1_1	MobiDBLite	protein_match	38	55	.	+	.	date=18-12-2020;Target=g1836.t1_1 38 55;ID=match$1621_38_55;signature_desc=consensus disorder prediction;Name=mobidb-lite;status=T
g1836.t1_1	MobiDBLite	protein_match	33	62	.	+	.	date=18-12-2020;Target=g1836.t1_1 33 62;ID=match$1622_33_62;signature_desc=consensus disorder prediction;Name=mobidb-lite;status=T
g6579.t1_1	.	polypeptide	1	191	.	+	.	ID=g6579.t1_1;md5=119a6eb5204990be0cf6a363dafca679
g6579.t1_1	PANTHER	protein_match	12	184	4.4E-41	+	.	date=18-12-2020;Target=g6579.t1_1 12 184;ID=match$1623_12_184;Name=PTHR12859:SF1;status=T
g6579.t1_1	Pfam	protein_match	14	163	9.2E-37	+	.	date=18-12-2020;Target=g6579.t1_1 14 163;ID=match$1624_14_163;signature_desc=PRA1 family protein;Name=PF03208;status=T;Dbxref="InterPro:IPR004895"
g6579.t1_1	PANTHER	protein_match	12	184	4.4E-41	+	.	date=18-12-2020;Target=g6579.t1_1 12 184;ID=match$1625_12_184;Name=PTHR12859;status=T
g7120.t1_1	.	polypeptide	1	784	.	+	.	ID=g7120.t1_1;md5=5a44e2c039494c17225e683bd306d8af
g7120.t1_1	CDD	protein_match	518	570	7.17405E-33	+	.	date=18-12-2020;Target=g7120.t1_1 518 570;ID=match$1626_518_570;signature_desc=SH3_SGSM3;Name=cd11813;status=T;Dbxref="InterPro:IPR035833"
g7120.t1_1	ProSiteProfiles	protein_match	589	752	26.754	+	.	date=18-12-2020;Target=g7120.t1_1 589 752;ID=match$1627_589_752;signature_desc=RUN domain profile.;Name=PS50826;status=T;Dbxref="InterPro:IPR004012"
g7120.t1_1	PANTHER	protein_match	23	417	1.5E-206	+	.	date=18-12-2020;Target=g7120.t1_1 23 417;ID=match$1628_23_417;Name=PTHR22957:SF296;status=T
g7120.t1_1	SUPERFAMILY	protein_match	121	284	2.35E-40	+	.	date=18-12-2020;Target=g7120.t1_1 121 284;ID=match$1629_121_284;Name=SSF47923;status=T;Dbxref="InterPro:IPR035969"
g7120.t1_1	Gene3D	protein_match	258	382	5.4E-25	+	.	date=18-12-2020;Target=g7120.t1_1 258 382;ID=match$1630_258_382;Name=G3DSA:1.10.472.80;status=T
g7120.t1_1	ProSiteProfiles	protein_match	139	330	33.265	+	.	date=18-12-2020;Target=g7120.t1_1 139 330;ID=match$1631_139_330;signature_desc=TBC/rab GAP domain profile.;Name=PS50086;status=T;Dbxref="InterPro:IPR000195"
g7120.t1_1	PANTHER	protein_match	23	417	1.5E-206	+	.	date=18-12-2020;Target=g7120.t1_1 23 417;ID=match$1632_23_417;Name=PTHR22957;status=T
g7120.t1_1	Gene3D	protein_match	506	569	3.7E-19	+	.	date=18-12-2020;Target=g7120.t1_1 506 569;ID=match$1633_506_569;Name=G3DSA:2.30.30.40;status=T
g7120.t1_1	Gene3D	protein_match	156	253	1.1E-26	+	.	date=18-12-2020;Target=g7120.t1_1 156 253;ID=match$1634_156_253;Name=G3DSA:1.10.8.270;status=T
g7120.t1_1	Gene3D	protein_match	117	155	5.1E-5	+	.	date=18-12-2020;Target=g7120.t1_1 117 155;ID=match$1635_117_155;Name=G3DSA:1.10.10.750;status=T
g7120.t1_1	SUPERFAMILY	protein_match	512	575	6.56E-19	+	.	date=18-12-2020;Target=g7120.t1_1 512 575;Ontology_term="GO:0005515";ID=match$1636_512_575;Name=SSF50044;status=T;Dbxref="InterPro:IPR036028"
g7120.t1_1	Gene3D	protein_match	570	758	1.7E-43	+	.	date=18-12-2020;Target=g7120.t1_1 570 758;ID=match$1637_570_758;Name=G3DSA:1.20.58.900;status=T;Dbxref="InterPro:IPR037213"
g7120.t1_1	SMART	protein_match	688	750	1.9E-19	+	.	date=18-12-2020;Target=g7120.t1_1 688 750;ID=match$1638_688_750;Name=SM00593;status=T;Dbxref="InterPro:IPR004012"
g7120.t1_1	SMART	protein_match	136	353	1.0E-51	+	.	date=18-12-2020;Target=g7120.t1_1 136 353;ID=match$1639_136_353;Name=SM00164;status=T;Dbxref="InterPro:IPR000195"
g7120.t1_1	Pfam	protein_match	597	748	4.1E-33	+	.	date=18-12-2020;Target=g7120.t1_1 597 748;ID=match$1640_597_748;signature_desc=RUN domain;Name=PF02759;status=T;Dbxref="InterPro:IPR004012"
g7120.t1_1	PRINTS	protein_match	531	546	4.2E-5	+	.	date=18-12-2020;Target=g7120.t1_1 531 546;Ontology_term="GO:0005515";ID=match$1641_531_546;signature_desc=SH3 domain signature;Name=PR00452;status=T;Dbxref="InterPro:IPR001452"
g7120.t1_1	PRINTS	protein_match	517	527	4.2E-5	+	.	date=18-12-2020;Target=g7120.t1_1 517 527;Ontology_term="GO:0005515";ID=match$1641_517_527;signature_desc=SH3 domain signature;Name=PR00452;status=T;Dbxref="InterPro:IPR001452"
g7120.t1_1	PRINTS	protein_match	559	571	4.2E-5	+	.	date=18-12-2020;Target=g7120.t1_1 559 571;Ontology_term="GO:0005515";ID=match$1641_559_571;signature_desc=SH3 domain signature;Name=PR00452;status=T;Dbxref="InterPro:IPR001452"
g7120.t1_1	PANTHER	protein_match	495	657	1.5E-206	+	.	date=18-12-2020;Target=g7120.t1_1 495 657;ID=match$1642_495_657;Name=PTHR22957:SF296;status=T
g7120.t1_1	SUPERFAMILY	protein_match	597	751	2.09E-11	+	.	date=18-12-2020;Target=g7120.t1_1 597 751;ID=match$1643_597_751;Name=SSF140741;status=T;Dbxref="InterPro:IPR037213"
g7120.t1_1	Pfam	protein_match	520	565	1.8E-11	+	.	date=18-12-2020;Target=g7120.t1_1 520 565;Ontology_term="GO:0005515";ID=match$1644_520_565;signature_desc=SH3 domain;Name=PF00018;status=T;Dbxref="InterPro:IPR001452"
g7120.t1_1	ProSiteProfiles	protein_match	514	573	25.899	+	.	date=18-12-2020;Target=g7120.t1_1 514 573;Ontology_term="GO:0005515";ID=match$1645_514_573;signature_desc=Src homology 3 (SH3) domain profile.;Name=PS50002;status=T;Dbxref="InterPro:IPR001452"
g7120.t1_1	PANTHER	protein_match	495	657	1.5E-206	+	.	date=18-12-2020;Target=g7120.t1_1 495 657;ID=match$1646_495_657;Name=PTHR22957;status=T
g7120.t1_1	SMART	protein_match	517	572	1.6E-19	+	.	date=18-12-2020;Target=g7120.t1_1 517 572;Ontology_term="GO:0005515";ID=match$1647_517_572;Name=SM00326;status=T;Dbxref="InterPro:IPR001452"
g7120.t1_1	Pfam	protein_match	143	347	8.6E-46	+	.	date=18-12-2020;Target=g7120.t1_1 143 347;ID=match$1648_143_347;signature_desc=Rab-GTPase-TBC domain;Name=PF00566;status=T;Dbxref="InterPro:IPR000195"
g7120.t1_1	SUPERFAMILY	protein_match	267	377	1.6E-17	+	.	date=18-12-2020;Target=g7120.t1_1 267 377;ID=match$1649_267_377;Name=SSF47923;status=T;Dbxref="InterPro:IPR035969"
g12035.t1_1	.	polypeptide	1	132	.	+	.	ID=g12035.t1_1;md5=1a44d3aedd527de6bc9b8985a0c654f6
g12035.t1_1	PANTHER	protein_match	1	131	3.9E-23	+	.	date=18-12-2020;Target=g12035.t1_1 1 131;ID=match$1650_1_131;Name=PTHR12336;status=T;Dbxref="InterPro:IPR031874"
g12035.t1_1	Pfam	protein_match	51	130	3.1E-18	+	.	date=18-12-2020;Target=g12035.t1_1 51 130;ID=match$1651_51_130;signature_desc=Cuticle protein;Name=PF15955;status=T;Dbxref="InterPro:IPR031874"
g6430.t1_1	.	polypeptide	1	744	.	+	.	ID=g6430.t1_1;md5=d421667b349ccbde8761791d098e13fd
g6430.t1_1	Gene3D	protein_match	1	159	5.0E-48	+	.	date=18-12-2020;Target=g6430.t1_1 1 159;ID=match$1652_1_159;Name=G3DSA:3.40.50.620;status=T;Dbxref="InterPro:IPR014729"
g6430.t1_1	MobiDBLite	protein_match	368	404	.	+	.	date=18-12-2020;Target=g6430.t1_1 368 404;ID=match$1653_368_404;signature_desc=consensus disorder prediction;Name=mobidb-lite;status=T
g6430.t1_1	Gene3D	protein_match	174	341	1.3E-60	+	.	date=18-12-2020;Target=g6430.t1_1 174 341;ID=match$1654_174_341;Name=G3DSA:3.40.50.620;status=T;Dbxref="InterPro:IPR014729"
g6430.t1_1	ProSiteProfiles	protein_match	419	463	7.199	+	.	date=18-12-2020;Target=g6430.t1_1 419 463;ID=match$1655_419_463;signature_desc=Clip domain profile.;Name=PS51888;status=T;Dbxref="InterPro:IPR022700"
g6430.t1_1	ProSiteProfiles	protein_match	484	739	25.723	+	.	date=18-12-2020;Target=g6430.t1_1 484 739;Ontology_term="GO:0004252","GO:0006508";ID=match$1656_484_739;signature_desc=Serine proteases, trypsin domain profile.;Name=PS50240;status=T;Dbxref="InterPro:IPR001254"
g6430.t1_1	CDD	protein_match	1	135	1.64232E-79	+	.	date=18-12-2020;Target=g6430.t1_1 1 135;ID=match$1657_1_135;signature_desc=CCT;Name=cd02174;status=T;Dbxref="InterPro:IPR041723"
g6430.t1_1	Gene3D	protein_match	609	728	3.7E-60	+	.	date=18-12-2020;Target=g6430.t1_1 609 728;ID=match$1658_609_728;Name=G3DSA:2.40.10.10;status=T;Dbxref="InterPro:IPR043504"
g6430.t1_1	CDD	protein_match	494	737	1.95127E-54	+	.	date=18-12-2020;Target=g6430.t1_1 494 737;Ontology_term="GO:0004252","GO:0006508";ID=match$1659_494_737;signature_desc=Tryp_SPc;Name=cd00190;status=T;Dbxref="InterPro:IPR001254"
g6430.t1_1	SMART	protein_match	483	734	1.2E-46	+	.	date=18-12-2020;Target=g6430.t1_1 483 734;Ontology_term="GO:0004252","GO:0006508";ID=match$1660_483_734;Name=SM00020;status=T;Dbxref="InterPro:IPR001254"
g6430.t1_1	MobiDBLite	protein_match	371	390	.	+	.	date=18-12-2020;Target=g6430.t1_1 371 390;ID=match$1661_371_390;signature_desc=consensus disorder prediction;Name=mobidb-lite;status=T
g6430.t1_1	Gene3D	protein_match	497	735	3.7E-60	+	.	date=18-12-2020;Target=g6430.t1_1 497 735;ID=match$1662_497_735;Name=G3DSA:2.40.10.10;status=T;Dbxref="InterPro:IPR043504"
g6430.t1_1	SUPERFAMILY	protein_match	2	121	1.26E-23	+	.	date=18-12-2020;Target=g6430.t1_1 2 121;ID=match$1663_2_121;Name=SSF52374;status=T
g6430.t1_1	SUPERFAMILY	protein_match	201	334	3.31E-25	+	.	date=18-12-2020;Target=g6430.t1_1 201 334;ID=match$1664_201_334;Name=SSF52374;status=T
g6430.t1_1	Coils	protein_match	339	359	.	+	.	date=18-12-2020;Target=g6430.t1_1 339 359;ID=match$1665_339_359;Name=Coil;status=T
g6430.t1_1	PANTHER	protein_match	351	743	4.2E-188	+	.	date=18-12-2020;Target=g6430.t1_1 351 743;ID=match$1666_351_743;Name=PTHR24260:SF28;status=T
g6430.t1_1	Pfam	protein_match	205	294	2.5E-15	+	.	date=18-12-2020;Target=g6430.t1_1 205 294;Ontology_term="GO:0003824","GO:0009058";ID=match$1667_205_294;signature_desc=Cytidylyltransferase-like;Name=PF01467;status=T;Dbxref="InterPro:IPR004821"
g6430.t1_1	Pfam	protein_match	1	118	3.0E-23	+	.	date=18-12-2020;Target=g6430.t1_1 1 118;Ontology_term="GO:0003824","GO:0009058";ID=match$1667_1_118;signature_desc=Cytidylyltransferase-like;Name=PF01467;status=T;Dbxref="InterPro:IPR004821"
g6430.t1_1	TIGRFAM	protein_match	1	57	9.2E-15	+	.	date=18-12-2020;Target=g6430.t1_1 1 57;Ontology_term="GO:0003824","GO:0009058";ID=match$1668_1_57;signature_desc=cyt_tran_rel: cytidyltransferase-like domain;Name=TIGR00125;status=T;Dbxref="InterPro:IPR004821"
g6430.t1_1	TIGRFAM	protein_match	202	269	7.6E-20	+	.	date=18-12-2020;Target=g6430.t1_1 202 269;Ontology_term="GO:0003824","GO:0009058";ID=match$1668_202_269;signature_desc=cyt_tran_rel: cytidyltransferase-like domain;Name=TIGR00125;status=T;Dbxref="InterPro:IPR004821"
g6430.t1_1	Pfam	protein_match	494	734	5.3E-39	+	.	date=18-12-2020;Target=g6430.t1_1 494 734;Ontology_term="GO:0004252","GO:0006508";ID=match$1669_494_734;signature_desc=Trypsin;Name=PF00089;status=T;Dbxref="InterPro:IPR001254"
g6430.t1_1	PRINTS	protein_match	586	600	1.8E-8	+	.	date=18-12-2020;Target=g6430.t1_1 586 600;Ontology_term="GO:0004252","GO:0006508";ID=match$1670_586_600;signature_desc=Chymotrypsin serine protease family (S1) signature;Name=PR00722;status=T;Dbxref="InterPro:IPR001314"
g6430.t1_1	PRINTS	protein_match	683	695	1.8E-8	+	.	date=18-12-2020;Target=g6430.t1_1 683 695;Ontology_term="GO:0004252","GO:0006508";ID=match$1670_683_695;signature_desc=Chymotrypsin serine protease family (S1) signature;Name=PR00722;status=T;Dbxref="InterPro:IPR001314"
g6430.t1_1	PRINTS	protein_match	517	532	1.8E-8	+	.	date=18-12-2020;Target=g6430.t1_1 517 532;Ontology_term="GO:0004252","GO:0006508";ID=match$1670_517_532;signature_desc=Chymotrypsin serine protease family (S1) signature;Name=PR00722;status=T;Dbxref="InterPro:IPR001314"
g6430.t1_1	PANTHER	protein_match	351	743	4.2E-188	+	.	date=18-12-2020;Target=g6430.t1_1 351 743;ID=match$1671_351_743;Name=PTHR24260;status=T
g6430.t1_1	CDD	protein_match	200	349	1.27865E-82	+	.	date=18-12-2020;Target=g6430.t1_1 200 349;ID=match$1672_200_349;signature_desc=ECT;Name=cd02173;status=T
g6430.t1_1	SUPERFAMILY	protein_match	461	737	1.51E-61	+	.	date=18-12-2020;Target=g6430.t1_1 461 737;ID=match$1673_461_737;Name=SSF50494;status=T;Dbxref="InterPro:IPR009003"
[truncated: 211,296 more rows]
